# Supplementary material for: Food Risk Analysis: Towards a Better Understanding of „Hazard” and „Risk” in EU food legislation
Source: Preprints.org preprint supplement (doi:10.20944/preprints202306.1556.v1), 2023-06-21
Supplement: Supplementary file 1 [file supplementary]

## Sheet: REG 625-2017
Old version
Language	Term	Location (doc page)	English	Translation	Observation	EU-FORA fellow reply
GA	hazard	-	-	-	-	-
Language	Term	Location (doc page)	English	Translation	Observation	EU-FORA fellow reply
GA	risk	50	4. Notwithstanding paragraphs 1 and 3, the competent authorities at border control posts and other points of entry into the Union shall perform official controls on the following whenever they have reason to believe that their entry into the Union may pose a risk to human, animal or plant health, animal welfare or, as regards GMOs and plant protection products, also to the environment:	4. D’ainneoin mhír 1 agus mhír 3, déanfaidh na húdaráis inniúla ag poist rialaithe teorann agus ag pointí teacht isteach eile san Aontas rialuithe oifigiúla ar an méid seo a leanas nuair atá cúis acu a chreidiúint go bhféadfaidís sláinte an duine, ainmhithe nó plandaí nó leas ainmhithe a chur i mbaol nó, maidir le OGManna agus táirgí cosanta plandaí, agus an comhshaol, freisin, a chur i mbaol:	Is "risk" translated as "may affect" ("a chur i mbaol")? Is the translation acceptable?
GA	risk	67	(g) plant products which, on account of their subsequent destination, may give rise to the risk of spreading infectious or contagious animal diseases;	(g) táirgí plandaí a d’fhéadfadh, i ngeall ar a gceann scríbe, galair thógálacha ghabhálacha a leathadh;	Is the word "risk" ("riosca")is missing from the Gaelic version? Is the translation acceptable?
New version
Language	Term	Location (doc page)	English	Translation	Observation	EU-FORA fellow reply
GA	hazard	21	(iii) audits of good hygiene practices and procedures based on HACCP principles;	(iii) iniúchtaí ar dhea-chleachtais sláinteachais agus ar nósanna imeachta atá bunaithe ar phrionsabal na bpointí criticiúla rialaithe ar anailís guaise (HACCP);	Is "hazard" ("guaise") used in the translation "the principle of critical control points of hazard analysis" ("phrionsabal na bpointí criticiúla rialaithe ar anailís guaise")? Is the translation acceptable?
Language	Term	Location (doc page)	English	Translation	Observation	EU-FORA fellow reply
GA	risk	47	4. Notwithstanding paragraphs 1 and 3, the competent authorities at border control posts and other points of entry into the Union shall perform official controls on the following whenever they have reason to believe that their entry into the Union may pose a risk to human, animal or plant health, animal welfare or, as regards GMOs and plant protection products, also to the environment:	4. D’ainneoin mhír 1 agus mhír 3, déanfaidh na húdaráis inniúla ag poist rialaithe teorann agus ag pointí teacht isteach eile san Aontas rialuithe oifigiúla ar an méid seo a leanas nuair atá cúis acu a chreidiúint go bhféadfaidís sláinte an duine, ainmhithe nó plandaí nó leas ainmhithe a chur i mbaol nó, maidir le OGManna agus táirgí cosanta plandaí, agus an comhshaol, freisin, a chur i mbaol:	The word "risk" ("riosca") does not appear in translation. Is the translation acceptable?
GA	risk	70	(g) plant products which, on account of their subsequent destination, may give rise to the risk of spreading infectious or contagious animal diseases;	(g) táirgí plandaí a d’fhéadfadh, i ngeall ar a gceann scríbe, galair thógálacha ghabhálacha a leathadh;	he word "risk" ("riosca") does not appear in translation. Is the translation acceptable?

## Sheet: Other GA Translations
	Hazard	Hazard (other synonims - dictionary)	Hazardous	Hazard Analysis	Risk	Risk (other synonims - dictionary)	Risk Analysis	Risk Assessment	Risk Assessor	Observations
Ireland	guais	mbagairtí; ghuaiseanna; guaiseanna	ghuaiseacha	anailís guaise	riosca	-	anailís riosca	measúnú riosca	measúnóir riosca
