# Supplementary material for: Food Risk Analysis: Towards a Better Understanding of „Hazard” and „Risk” in EU food legislation
Source: Preprints.org preprint supplement (doi:10.20944/preprints202306.1556.v1), 2023-06-21
Supplement: Supplementary file 2 [file Supplementary Material 2.xlsx]

## Sheet: Sheet1
Country	Participant	Hazard	Hazard (other synonims - dictionary)	Hazardous	Hazard Analysis	Risk	Risk (other synonims - dictionary)	Risk Analysis	Risk Assessment	Risk Assessor	Observations
Bulgaria
	Expert	опасност		опасен;опасни	анализ на опасностите	риск	риск; риска; рисковете; рискови	анализ на риска	оценка на риска	Оценител на риска
	Participant	Hazard	Hazard (other synonims - dictionary)	Hazardous	Hazard Analysis	Risk	Risk (other synonims - dictionary)	Risk Analysis	Risk Assessment	Risk Assessor	Observations
Spain
	Expert	peligro	amenaza, riesgo	peligroso	análisis de peligro/ análisis de riesgo	riesgo	peligro, amenaza, contingencia	análisis de riesgos	evaluacíon de riesgo	evaluador/asesor de riesgo	"contingencia" is not advisable to be used
	Expert	peligro	alerta, amenaza, riesgo	peligroso	análisis de peligro/ análisis de riesgo	riesgo	peligro, amenaza, daño, contingencia	análisis de riesgos	evaluación del riesgo	evaluador/asesor de riesgos	"contingencia" is not advisable to be used
	Participant	Hazard	Hazard (other synonims - dictionary)	Hazardous	Hazard Analysis	Risk	Risk (other synonims - dictionary)	Risk Analysis	Risk Assessment	Risk Assessor	Observations
Germany
	Expert	Gefahr		gefährlich	Gefahrenanalyse	Risiko		Risikoanalyse	Risikobewertung	Risikobewerter
	Participant	Hazard	Hazard (other synonims - dictionary)	Hazardous	Hazard Analysis	Risk	Risk (other synonims - dictionary)	Risk Analysis	Risk Assessment	Risk Assessor	Observations
Estonia
	Expert	oht	hädaoht	ohtude; ohu; ohutegurist	ohuanalüüs	risk	riisiko; riske	riskianalüüs	riskihindamisel	riskihindaja	The synonym for 'hazard' is colloquial and would not be used in risk assessment. It would translate as 'threat' or 'danger'. The synonym for 'risk' is anachronistic. Also, lay people would sometimes use the terms for 'hazard' and 'risk' interchangeably, although they are not synonyms according to dictionaries.
	Participant	Hazard	Hazard (other synonims - dictionary)	Hazardous	Hazard Analysis	Risk	Risk (other synonims - dictionary)	Risk Analysis	Risk Assessment	Risk Assessor	Observations
Greece
	Expert	πηγής κινδύνου; παραγόντων κινδύνου	φοβερά; κίνδυνος	επικίνδυνος; επικίνδυνων	ανάλυση κινδύνου	κινδύνου	κίνδυνο; κινδύνων; κίνδυνος	ανάλυση κινδύνου	εκτίμηση κινδύνου; αξιολόγηση του κινδύνου	αξιολογητής κινδύνου	There is not a good distinction between hazard and risk in this language. For example, "source of risk" is used for hazard.
	Participant	Hazard	Hazard (other synonims - dictionary)	Hazardous	Hazard Analysis	Risk	Risk (other synonims - dictionary)	Risk Analysis	Risk Assessment	Risk Assessor	Observations
Ireland
	Expert	guais	mbagairtí; ghuaiseanna; guaiseanna	ghuaiseacha	dadansoddi peryglon	riosca		anailís riosca	measúnú riosca	measúnóir riosca
	Participant	Hazard	Hazard (other synonims - dictionary)	Hazardous	Hazard Analysis	Risk	Risk (other synonims - dictionary)	Risk Analysis	Risk Assessment	Risk Assessor	Observations
Ireland/UK
	Expert	hazard				risk		risk analysis	risk assessment	risk assessor
	Participant	Hazard	Hazard (other synonims - dictionary)	Hazardous	Hazard Analysis	Risk	Risk (other synonims - dictionary)	Risk Analysis	Risk Assessment	Risk Assessor	Observations
France
	Expert	danger		dangereux	analyse de/du danger	risque		analyse de(s) risque(s)	évaluation des risque	évaluateur•trice de risques
	Participant	Hazard	Hazard (other synonims - dictionary)	Hazardous	Hazard Analysis	Risk	Risk (other synonims - dictionary)	Risk Analysis	Risk Assessment	Risk Assessor	Observations
Italy
	Expert	pericolo				rischio		analisi del rischio	valutazione del rischio
	Expert	pericolo				rischio		analisi del rischio	valutazione del rischio
	Expert	pericolo				rischio		analisi del rischio	valutazione del rischio
	Participant	Hazard	Hazard (other synonims - dictionary)	Hazardous	Hazard Analysis	Risk	Risk (other synonims - dictionary)	Risk Analysis	Risk Assessment	Risk Assessor	Observations
Latvia
	Expert	apdraudējumu	briesmas; draudi; draudiem	bīstams; bīstami, bīstamo		riska	riska; risku; riskiem; risks	riska analīze	riska novērtēšana	riska novērtētājs
	Participant	Hazard	Hazard (other synonims - dictionary)	Hazardous	Hazard Analysis	Risk	Risk (other synonims - dictionary)	Risk Analysis	Risk Assessment	Risk Assessor	Observations
The Netherlands
	Expert	gevaar	gevaren	gevaarlijke	gevarenanalyse	risico	risicofactoren	risico analyse	risicobeoordeling;risico-evaluatie	risicobeoordelaar
	Participant	Hazard	Hazard (other synonims - dictionary)	Hazardous	Hazard Analysis	Risk	Risk (other synonims - dictionary)	Risk Analysis	Risk Assessment	Risk Assessor	Observations
Poland
	Expert	zagrożenie	niebezpieczeństwo, groźba, ryzyko	zagrazajacy, niebezpieczny, groźny, szkodliwy	analiza zagrozen	ryzyko	niebezpieczeństwo, zagrożenie, groźba	analiza ryzyka	ocena ryzyka	osoba oceniajaca ryzyko
	Participant	Hazard	Hazard (other synonims - dictionary)	Hazardous	Hazard Analysis	Risk	Risk (other synonims - dictionary)	Risk Analysis	Risk Assessment	Risk Assessor	Observations
Portugal
	Expert	perigo	risco, ameaça	perigoso	análise de perigo	risco	perigo, ameaça	análise de risco	avaliação de risco	avaliador de risco
	Expert	perigo	ameaça; risco	perigoso	análise de perigos	risco	perigo	análise de risco	avaliação de risco	avaliador de risco	https://www.asae.gov.pt/ ; http://www.insa.pt/
	Participant	Hazard	Hazard (other synonims - dictionary)	Hazardous	Hazard Analysis	Risk	Risk (other synonims - dictionary)	Risk Analysis	Risk Assessment	Risk Assessor	Observations
Romania
	Expert	pericol	nevoie; primejdie; risc (rar)	periculos (adj.)	analiza pericolelor	risc	primejdie; pagubă posibilă; pericol posibil; eveniment probabil, generator de pierderi; Pericol eventual, mai mult sau mai puțin previzibil	analiza de risc	evaluare de risc	evaluator de risc
	Participant	Hazard	Hazard (other synonims - dictionary)	Hazardous	Hazard Analysis	Risk	Risk (other synonims - dictionary)	Risk Analysis	Risk Assessment	Risk Assessor	Observations
Slovenia
	Expert	nevarnosti		nevarnih		tveganje			oceno tveganja
Country	Participant	Hazard	Hazard (other synonims - dictionary)	Hazardous	Hazard Analysis	Risk	Risk (other synonims - dictionary)	Risk Analysis	Risk Assessment	Risk Assessor	Observations
Czech Republic
	Expert	nebezpečí	hrozbám	nebezpečný	analýza nebezpečí	riziko	rizicích	analýza rizika“	hodnocením rizik;posouzení rizika	hodnotitel rizik
Country	Participant	Hazard	Hazard (other synonims - dictionary)	Hazardous	Hazard Analysis	Risk	Risk (other synonims - dictionary)	Risk Analysis	Risk Assessment	Risk Assessor	Observations
Croatia
	Expert	opasnost	prijetnje	opasan; opasnih	analiza opasnosti	rizika; rizicima; rizičnog; rizika		analiza rizika	procjena rizika	pročjenitelj rizika
Country	Participant	Hazard	Hazard (other synonims - dictionary)	Hazardous	Hazard Analysis	Risk	Risk (other synonims - dictionary)	Risk Analysis	Risk Assessment	Risk Assessor	Observations
Denmark
	Expert	fare		farligt; farlige	fareanalyse	risiko; risic; risiciene; risikofaktorer; risikostyring; sundhedsrisici; risikovurdering; risikokommunikation		risikoanalyse	risikovurdering	risikovurderer
Country	Participant	Hazard	Hazard (other synonims - dictionary)	Hazardous	Hazard Analysis	Risk	Risk (other synonims - dictionary)	Risk Analysis	Risk Assessment	Risk Assessor	Observations
Hungary
	Expert	veszély		veszélyes	veszélyelemzés	kockázat	kockázatok	kockázatelemzés	kockázatértékelés; kockázatértékelésen	kockázatértékelő
Country	Participant	Hazard	Hazard (other synonims - dictionary)	Hazardous	Hazard Analysis	Risk	Risk (other synonims - dictionary)	Risk Analysis	Risk Assessment	Risk Assessor	Observations
Lithuania
	Expert	pavojus		pavojingas	pavojaus analizė	rizika		rizikos analizė	rizikos vertinimas; rizikos įvertinimu	rizikos vertintojas
Country	Participant	Hazard	Hazard (other synonims - dictionary)	Hazardous	Hazard Analysis	Risk	Risk (other synonims - dictionary)	Risk Analysis	Risk Assessment	Risk Assessor	Observations
Malta
	Expert	periklu	ttheddid; perikli; tal-perikoli; ta' perikoli	perikoluż; perikolużi	analiżi tal-periklu	riskju	ir-riskji	analiżi tar-riskju	valutazzjoni tar-riskju	assessur tar-riskju
Country	Participant	Hazard	Hazard (other synonims - dictionary)	Hazardous	Hazard Analysis	Risk	Risk (other synonims - dictionary)	Risk Analysis	Risk Assessment	Risk Assessor	Observations
Slovakia
	Expert	nebezpečenstva	ohrozenie; ohrozenia; hrozbám; nebezpečenstvo;	nebezpečný; nebezpečných	analýza nebezpečenstva	riziko	rizikami; rizík; riziko; riziku; rizikami; rizikách; riziká; rizikové; tveganji	analýza rizík	posúdenie rizík	hodnotiteľ rizika; hodnotení rizika
Country	Participant	Hazard	Hazard (other synonims - dictionary)	Hazardous	Hazard Analysis	Risk	Risk (other synonims - dictionary)	Risk Analysis	Risk Assessment	Risk Assessor	Observations
Finland
	Expert	vaaralla	vaara; vaaroihin; vaaran; uhkien; vaarat	vaarallinen; vaarallisten	vaara -analyysi	riski	riskeiltä; riskejä; riskeistä; riskiin; riskeihin; riskit; riskitekijät; riskeihin; riskiä; riskinarviointi	riskianalyysi	riskin arviointi; riskinarviointimenettelyt	riskinarvioija
Country	Participant	Hazard	Hazard (other synonims - dictionary)	Hazardous	Hazard Analysis	Risk	Risk (other synonims - dictionary)	Risk Analysis	Risk Assessment	Risk Assessor	Observations
Sweeden
	Expert	fara		farliga	faroanalys	risk		riskanalys	riskbedömning	riskbedömare
