# Supplementary material for: Food Risk Analysis: Towards a Better Understanding of „Hazard” and „Risk” in EU food legislation
Source: Preprints.org preprint supplement (doi:10.20944/preprints202306.1556.v1), 2023-06-21
Supplement: Supplementary file 3 [file BG.xlsx]

## Sheet: REG 178-2002
Language	Term	Location (doc page)	English	Translation	Observation	EU-FORA fellow reply
BG	hazard	5	(59) A system for rapid alert already exists in the framework of Council Directive 92/59/EEC of 29 June 1992 on general product safety (1). The scope of the existing system includes food and industrial products but not feed. Recent food crises have demonstrated the need to set up an improved and broadened rapid alert system covering food and feed. This revised system should be managed by the Comm…	(59) В рамките на Директива 92/59/ЕИО на Съвета от 29 юни 1992 г. относно общата безопасност на продуктите (1) вече съществува система за бързо предупреждение. Съществуващата система включва храни и промишлени продукти, но не и фуражи. Неотдавна възникналите продоволствени кризи показаха необходимостта от изграждане на подобрена и разширена система за бързо предупреждение, която да включва храни …	Is "emergency" translated as "hazard" ("опасност") in "radiological emergency"? Is the translation acceptable?
Old version
Language	Term	Location (doc page)	English	Translation	Observation	EU-FORA fellow reply
BG	risk	2	(15) Networking of laboratories of excellence, at regional and/or interregional level, with the aim of ensuring continuous monitoring of food safety, could play an important role in the prevention of potential health risks for citizens.	(15) Свързването в мрежа на първокласни лаборатории на регионално и/или междурегионално равнище, с цел осигуряване на непрекъснато наблюдение и контрол на безопасността на храните, би могло да изиграе важна роля в предотвратяването на потенциални опасности за здравето на гражданите.	Is "risk" translated as "hazard" ("опасности") in "health risks"?
BG	risk	2	(17) Where food law is aimed at the reduction, elimination or avoidance of a risk to health, the three interconnected components of risk analysis — risk assessment, risk management, and risk communication — provide a systematic methodology for the determination of effective, proportionate and targeted measures or other actions to protect health.	(17) Когато законодателството в областта на храните е насочено към намаляване, премахване или избягване на опасност за здравето, трите взаимосвързани компонента на анализа на риска, а именно оценка на риска, управление на риска и обмяна на информация за риска, осигуряват систематична методология за определянето на ефективни, съразмерни и целеви мерки или други действия за опазване на здравето.	Is "risk" translated as "hazard" ("опасности") in " elimination or avoidance of a risk to health"?
BG	risk	2	(22) Food safety and the protection of consumer's interests is of increasing concern to the general public, non-governmental organisations, professional associations, international trading partners and trade organisations. It is necessary to ensure that consumer confidence and the confidence of trading partners is secured through the open and transparent development of food law and through public…	(22) Безопасността на храните и защитата на интересите на потребителите представляват нарастваща грижа за широката общественост, неправителствените организации, професионалните сдружения, международните търговски партньори и търговските организации. Необходимо е да се гарантира доверието на потребителите и търговските партньори чрез открито и прозрачно разработване на законодателство в областта н…	Is "risk" translated as "hazard" ("опасности") in "that a food may present a risk to health"?
New version
Language	Term	Location (doc page)	English	Translation	Observation	EU-FORA fellow reply
BG	hazard	-	-	-	-
Language	Term	Location (doc page)	English	Translation	Observation	EU-FORA fellow reply
BG	risk	-	-	-	-

## Sheet: REG 852-2004
Old version
Language	Term	Location (doc page)	English	Translation	Observation	EU-FORA fellow reply
BG	hazard	2	(10) Food hazards present at the level of primary production should be identified and adequately controlled to ensure the achievement of the objectives of this Regulation. However, in the case of the direct supply of small quantities of primary products, by the food business operator producing them, to the final consumer or to a local retail establishment, it is appropriate to protect public heal…	(10) За да се гарантира постигането на целите на настоящия регламент, следва да се идентифицират и контролират по подходящ начин хранителните рискове, които съществуват на ниво първично производство. При директната доставка обаче на малки количества първични продукти от техния производител до крайния потребител или местния обект за търговия на дребно, е уместно общественото здраве да се опазва чр…	Is "hazards" translated as "risks" ("рискове") in "food hazards"?
	hazard	2	(17) The setting of objectives such as pathogen reduction targets or performance standards may guide the implementation of hygiene rules. It is therefore necessary to provide procedures for that purpose. Such objectives would supplement existing food law, such as Council Regulation (EEC) No 315/93 of 8 February 1993 laying down Community procedures for contaminants in food 1 , which provides for …	(17) Поставянето на цели като например намаляване на патогените или изпълнение по определени стандарти може да ръководи прилагането на хигиенни правила. Необходимо е следователно за тази цел да се предвидят съответни процедури. Подобни цели биха допълнили съществуващото законодателство за храните като например Регламент (ЕИО) № 315/93 на Съвета от 8 февруари 1993 г. относно определяне на процедур…	Is "unsafe" translated with the word expressing "risk" ("опасни")? Is that acceptable?
New version
Language	Term	Location (doc page)	English	Translation	Observation	EU-FORA fellow reply
BG	risk	2	(16) Flexibility is also appropriate to enable the continued use of traditional methods at any of the stages of production, processing or distribution of food and in relation to structural requirements for establishments. Flexibility is particularly important for regions that are subject to special geographical constraints, including the outermost regions referred to in Article 299(2) of the Trea…	(16) Гъвкавостта е също подходяща за създаване на възможност за продължаване използването на традиционни методи на който и да е етап от производството, преработката или разпространението на храни, както и по отношение на структурните изисквания за обектите. Гъвкавостта е особено важна за региони, които са обект на специални географски ограничения, включително и най-отдалечените региони, посочени …	Is "compromised" translated with the word expressing "risk" ("риск")? Is that acceptable?
Language	Term	Location (doc page)	English	Translation	Observation	EU-FORA fellow reply
BG	hazard	-	-	-	-	-
Language	Term	Location (doc page)	English	Translation	Observation	EU-FORA fellow reply
BG	risk	-	-	-	-	-

## Sheet: REG 853-2004
Old version
Language	Term	Location (doc page)	English	Translation	Observation	EU-FORA fellow reply
BG	hazard	1	(7) The requirement in Regulation (EC) No /2004 ∗ whereby food business operators carrying out any stage of production, processing and distribution of food after primary production and associated operations must put in place, implement and maintain procedures based on hazard analysis and critical control point (HACCP) principles also permits simplification.	(7) Изискването в Регламент (ЕО) № 852/2004, с което предприятията за хранителни продукти, които извършват един от етапите на производство, преработка и разпределение на храни след първичното производство и свързаните с него операции, се задължават да въведат, прилагат и поддържат процедури, основани на принципите на анализ на риска и критичната контролна точка, също дава възможност за опростяван…	Is "hazard" translated as "risk" ("риска") in "hazard analysis and critical control point (HACCP)"?
BG	hazard	16	SECTION II: OBJECTIVES OF HACCP-BASED PROCEDURES	РАЗДЕЛ II: ЦЕЛИ НА ПРОЦЕДУРИТЕ, ОСНОВАНИ НА АНАЛИЗ НА РИСКА И КРИТИЧНАТА КОНТРОЛНА ТОЧКА (НАССР)	Is "hazard" translated as "risk" ("риска") in "hazard analysis and critical control point (HACCP)"?
BG	hazard	55	4. Frogs and snails must be subjected to an organoleptic examination carried out by sampling. If that examination indicates that they might present a hazard, they must not be used for human consumption.	1. Жабите и охлювите трябва да бъдат убити в обект, чиято конструкция, вътрешно разпределение и оборудване са съобразени с тази цел.	Is "hazard" translated as "risk" ("риск") in "present a hazard"?
BG	hazard	55	6. After killing, snails' hepato-pancreas must, if it might present a hazard, be removed and not be used for human consumption.	6. След умъртвяването на охлювите трябва да се отстрани хепато-панкреаса, ако носи риск, и да не се използва за човешка консумация.	Is "hazard" translated as "risk" ("риск") in "present a hazard"?
Language	Term	Location (doc page)	English	Translation	Observation	EU-FORA fellow reply
BG	risk	-	-	-	-	-
New version
Language	Term	Location (doc page)	English	Translation	Observation	EU-FORA fellow reply
BG	hazard	-	-	-	-	-
Language	Term	Location (doc page)	English	Translation	Observation	EU-FORA fellow reply
BG	risk	-	-	-	-	-

## Sheet: REG 625-2017
Old version
Language	Term	Location (doc page)	English	Translation	Observation	EU-FORA fellow reply
BG	hazard	-	-	-	-	-
Language	Term	Location (doc page)	English	Translation	Observation	EU-FORA fellow reply
BG	risk	5	(31) The competent authorities should ensure that the staff responsible for official controls does not disclose information acquired during the performance of those controls where that information is covered by professional secrecy. Unless there is an overriding interest to justify disclosure, professional secrecy should include information which would undermine the purpose of inspections, invest…	(31) Компетентните органи следва да гарантират, че служителите, отговарящи за официалния контрол, не оповестяват информация, придобита по време на неговото извършване, когато тази информация представлява професионална тайна. Освен ако не съществува висш интерес, който оправдава оповестяването, професионалната тайна следва да обхваща информацията, която би могла да възпрепятства постигането на цел…	Is "risk" translated as "hazard" in "risk for health" ("а опасност за здравето")?
BG	risk	14	(85) It is important for the performance of effective official controls and other official activities that the competent authorities in the Member States, the Commission and, where relevant, operators be able to exchange data and information related to official controls or results therefrom rapidly and efficiently. Several information systems are established by Union legislation and managed by th…	(85) От значение за извършването на ефективен официален контрол и други официални дейности е компетентните органи в държавите членки, Комисията и, когато е целесъобразно, операторите, да имат възможност да обменят бързо и ефикасно данни и информация, свързани с официалния контрол, както и резултатите от него. Няколко информационни системи са установени от законодателството на Съюза и се управлява…	Is "risk" translated as "hazard" in "risk to human " ("опасност за здравето")?
New version
Language	Term	Location (doc page)	English	Translation	Observation	EU-FORA fellow reply
BG	hazard	-	-	-	-	-
Language	Term	Location (doc page)	English	Translation	Observation	EU-FORA fellow reply
BG	risk	-	-	-	-	-

## Sheet: REG 1381-2019
Single version
Language	Term	Location (doc page)	English	Translation	Observation	EU-FORA fellow reply
BG	hazard	-	-	-	-	-
Language	Term	Location (doc page)	English	Translation	Observation	EU-FORA fellow reply
BG	risk	-	-	-	-	-
