# Supplementary material for: Food Risk Analysis: Towards a Better Understanding of „Hazard” and „Risk” in EU food legislation
Source: Preprints.org preprint supplement (doi:10.20944/preprints202306.1556.v1), 2023-06-21
Supplement: Supplementary file 3 [file supplementary]

## 5<sup>th</sup> European Food Risk Assessment Fellowship cohort 2021-2022

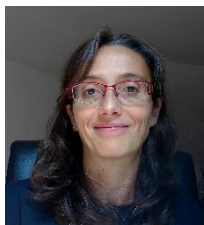

**Cristina Alonso Andicoberry, EU-FORA Programme Manager**

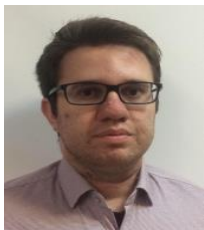

**Plamen Panayotov, EFSA Trainee**

Contact: [EU-FORA@efsa.europa.eu](mailto:EU-FORA@efsa.europa.eu)

| HOSTING ORGANISATION                                                                                                                                                              | COUNTRY | WORK PROGRAMME                                                                                                  | FELLOW                                                                                                                           | FROM     |
|-----------------------------------------------------------------------------------------------------------------------------------------------------------------------------------|---------|-----------------------------------------------------------------------------------------------------------------|----------------------------------------------------------------------------------------------------------------------------------|----------|
|  <p>Risiken erkennen – Gesundheit schützen<br/>Federal Institute for Risk Assessment (BfR)</p> | Germany | The use of NAM and omics data in risk assessment                                                                |  <p><b>Andrea Miccoli</b></p>               | Italy    |
|                                                                                                                                                                                   |         | Insects in food and their relevance regarding allergenicity assessment                                          |  <p><b>Lidia Delgado Calvo-Flores</b></p>   | Spain    |
|                                                                                                                                                                                   |         | Risk Assessment of Food Contact Materials                                                                       |  <p><b>Otilia Carvalho</b></p>              | Portugal |
|  <p>Institute of Agriculture and food biotechnology (IBPRS-PIB)</p>                            | Poland  | Risk assessment of contaminants in foods retailed by a large international food distributor in Poland.          |  <p><b>Chiara Balbo</b></p>                 | Italy    |
|                                                                                                                                                                                   |         | Microbiological risk assessment of traditional food of animal origin produced in short supply chains in Poland. |  <p><b>Constantine Richard Stefanou</b></p> | Greece   |

| HOSTING ORGANISATION                                                                                                                                                                       | COUNTRY | WORK PROGRAMME                                                                                                                                                | FELLOW                                                                                                                    | FROM   |
|--------------------------------------------------------------------------------------------------------------------------------------------------------------------------------------------|---------|---------------------------------------------------------------------------------------------------------------------------------------------------------------|---------------------------------------------------------------------------------------------------------------------------|--------|
|  <p><b>Institute of Marine Research (IMR) &amp; Norwegian Institute of Public Health (NIPH)</b></p>       | Norway  | Developing a framework for open and FAIR data management practices for next generation risk- and benefit assessment of fish and seafood                       |  <p><b>Javier Pineda Pampliega</b></p> | Spain  |
|  <p><b>Instituto Nacional de Investigación y Tecnología agraria y alimentaria (INIA)</b></p>              | Spain   | Impact of drinking water treatment processes on the residues of plant protection products for consumer risk assessment. Theoretical and experimental studies. |  <p><b>Angela Mari</b></p>             | Italy  |
|  <p><b>National Food Institute, Technical University of Denmark (DTU Food)</b></p>                      | Denmark | Allergenicity risk assessment                                                                                                                                 |  <p><b>Biase Liguori</b></p>         | Italy  |
|  <p><b>National Research Council of Italy Institute of biochemistry and cell biology (CNR-IBBC)</b></p> | Italy   | Environmental Modifiers causing Neurodegeneration (EMOgen)                                                                                                    |  <p><b>Ana Guillem Amat</b></p>      | Spain  |
|                                                                                                                                                                                            |         | Risk assessment of honeybee stressors based on in silico analysis of molecular interactions                                                                   |  <p><b>Monica del Águila</b></p>     | Spain  |
|                                                                                                                                                                                            |         | Use of biosensors for rapid and sensitive detection of pesticides in food samples for Food Safety Chemical Risk Assessment.                                   |  <p><b>Vasiliki Garefalaki</b></p>   | Greece |
|  <p><b>National Research Council of Italy Institute of Sciences of Food Productions (CNR-ISPA)</b></p>  | Italy   | Risk Assessment/Risk Communication: understanding the context and addressing Priorities of the future — a learning-by-doing approach                          |  <p><b>Frederic Bayer</b></p>        | France |

| HOSTING ORGANISATION                                                                                                                                                                     | COUNTRY | WORK PROGRAMME                                                                                                                | FELLOW                                                                                                                  | FROM    |
|------------------------------------------------------------------------------------------------------------------------------------------------------------------------------------------|---------|-------------------------------------------------------------------------------------------------------------------------------|-------------------------------------------------------------------------------------------------------------------------|---------|
|  <p><b>UNIVERSIDAD DE BURGOS</b></p> <p>Universidad de Burgos (UBU)</p>                                 | Spain   | Risk assessment of enteric viruses along the food chain and in the population                                                 |  <p><b>Kevin Hunt</b></p>            | Ireland |
|                                                                                                                                                                                          |         |                                                                                                                               |  <p><b>Monika Trzaskowska</b></p>    | Poland  |
|  <p><b>Universidad Politécnica de Cartagena</b></p> <p>Universidad Politecnica de Cartagena (UPCT)</p> | Spain   | Training in tools to develop Risk ranking and Quantitative microbial risk assessment along the food chain of Spanish products |  <p><b>Alessandro Zambon</b></p>    | Italy   |
|  <p><b>UNIVERSITÀ DI PARMA</b></p> <p>Università degli Studi di Parma (UNIPR)</p>                     | Italy   | Changes in terms of risk/benefit of shifting diets towards healthier and more sustainable dietary models                      |  <p><b>Octavian Mihalache</b></p>  | Romania |
|                                                                                                                                                                                          |         |                                                                                                                               |  <p><b>Alik Kalmpourtzidou</b></p> | Greece  |
|                                                                                                                                                                                          | France  | Innovative in vitro approaches to toxicological investigations of mycotoxins effects                                          |  <p><b>Beatriz Arce López</b></p>  | Spain   |

| HOSTING ORGANISATION                                                                                                                                                                                                                            | COUNTRY  | WORK PROGRAMME                                                                                             | FELLOW                                                                                                                                                                                                                                  | FROM                        |
|-------------------------------------------------------------------------------------------------------------------------------------------------------------------------------------------------------------------------------------------------|----------|------------------------------------------------------------------------------------------------------------|-----------------------------------------------------------------------------------------------------------------------------------------------------------------------------------------------------------------------------------------|-----------------------------|
|  <p>University of Granada (INYTA/UGR)</p>                                                                                                                      | Spain    | Microbiota analysis for risk assessment of xenobiotics and its potential impact on dysbiosis and endocrine |  <p>Antonios Ampatzoglou</p>  <p>Agnieszka Gruszecka-Kosowska</p> | <p>Greece</p> <p>Poland</p> |
|   <p>University of Maribor &amp; Josef Stefan Institute (UM &amp; JSI)</p> | Slovenia | Implementation of matrix effects into chemical food contaminant risk assessment                            |  <p>Ana-Andreea Cioca</p>                                                                                                                          | Romania                     |
|  <p>University of Veterinary Medicine Budapest (UVMB)</p>                                                                                                    | Hungary  | Emerging risk identification by applying data analytical tools                                             |  <p>Elisa Palmas</p>                                                                                                                               | Italy                       |
