# Supplementary material for: Food Risk Analysis: Towards a Better Understanding of „Hazard” and „Risk” in EU food legislation
Source: Preprints.org preprint supplement (doi:10.20944/preprints202306.1556.v1), 2023-06-21
Supplement: Supplementary file 4 [file CS.xlsx]

## Sheet: REG 178-2002
Old version
Language	Term	Location (doc page)	English	Translation	Observation	EFSA Focal Point
CS	hazard	10	6. Where any food which is unsafe is part of a batch, lot or consignment of food of the same class or description, it shall be presumed that all the food in that batch, lot or consignment is also unsafe, unless following a detailed assessment there is no evidence that the rest of the batch, lot or consignment is unsafe.	6. Pokud je nebezpečná potravina součástí dávky, šarže nebo zásilky potravin zařazených do stejné kategorie nebo odpovídajících stejnému popisu, předpokládá se, že všechny potraviny v dané dávce, šarži nebo zásilce rovněž nejsou bezpečné, pokud důkladné šetření neprokáže, že neexistují důkazy o tom, že zbytek dávky, šarže nebo zásilky není bezpečný	Is "unsafe" translated as"hazardous" ("nebezpečná")? Is the translation acceptable?
CS	hazard	11	3. Where a feed which has been identified as not satisfying the feed safety requirement is part of a batch, lot or consignment of feed of the same class or description, it shall be presumed that all of the feed in that batch, lot or consignment is so affected, unless following a detailed assessment there is no evidence that the rest of the batch, lot or consignment fails to satisfy the feed safet…	3. Pokud krmivo, u něhož bylo zjištěno, že nesplňuje požadavek na bezpečnost krmiv, tvoří součást dávky, šarže nebo zásilky krmiv zařazených do stejné kategorie nebo odpovídajících stejnému popisu, předpokládá se, že všechna krmiva v dané dávce, šarži nebo zásilce jsou rovněž nebezpečná, pokud důkladné šetření neprokáže, že neexistují důkazy o tom, že zbytek dávky, šarže nebo zásilky nesplňuje po…	Is "unsafe" translated as"hazardous" ("nebezpečná")? Is the translation acceptable?
Language	Term	Location (doc page)	English	Translation	Observation	EFSA Focal Point
CS	risk	5	(60) Recent food safety incidents have demonstrated the need to establish appropriate measures in emergency situations ensuring that all foods, whatever their type and origin, and all feed should be subject to common measures in the event of a serious risk to human health, animal health or the environment. Such a comprehensive approach to emergency food safety measures should allow effective acti…	(60) Nedávné události související s bezpečností potravin ukázaly potřebu stanovit vhodná opatření pro mimořádné situace, která zajistí, aby se v případě vážného ohrožení lidského zdraví, zdraví zvířat nebo životního prostředí vztahovala na všechny potraviny bez ohledu na druh a původ a na všechna krmiva společná opatření. Tento komplexní přístup k mimořádným opatřením v oblasti bezpečnosti potrav…	Is "risk" translated as "threat" ("ohrožení") in "risk to human health"? Is the translation acceptable?
CS	risk	13	(h) to provide scientific and technical assistance, when requested to do so by the Commission, in the crisis management procedures implemented by the Commission with regard to the safety of food and feed;	h) na žádost Komise poskytovat vědeckou a technickou pomoc v rámci postupů řízení rizika používaných Komisí v souvislosti s bezpečností potravin a krmiv;	Are "crisis management procedures" translated as "risk management procedures" ("postupů řízení rizika používaných")? Is the translation acceptable?
CS	risk	21	a) any measure they adopt which is aimed at restricting the placing on the market or forcing the withdrawal from the market or the recall of food or feed in order to protect human health and requiring rapid action;	a) všechna opatření, která přijmou s cílem omezit uvádění potraviny nebo krmiva na trh nebo prosadit jejich stažení z trhu nebo zpětné převzetí, pokud již byly dodány spotřebitelům, z důvodu ochrany lidského zdraví před rizikem, které vyžaduje rychlé jednání;	Is "in order to protect human health" translated as "for reasons of protection human health in the face of the risk" ("z důvodu ochrany lidského zdraví před rizikem")? Is this an addition in the Czech version? Is the translation acceptable?
New version
Language	Term	Location (doc page)	English	Translation	Observation	EFSA Focal Point
CS	hazard	11	6. Where any food which is unsafe is part of a batch, lot or consignment of food of the same class or description, it shall be presumed that all the food in that batch, lot or consignment is also unsafe, unless following a detailed assessment there is no evidence that the rest of the batch, lot or consignment is unsafe.	6. Pokud je nebezpečná potravina součástí dávky, šarže nebo zásilky potravin zařazených do stejné kategorie nebo odpovídajících stejnému popisu, předpokládá se, že všechny potraviny v dané dávce, šarži nebo zásilce rovněž nejsou bezpečné, pokud důkladné šetření neprokáže, že neexistují důkazy o tom, že zbytek dávky, šarže nebo zásilky není bezpečný	Is "unsafe" translated with the word used fo "hazard" ("nebezpečná" in "food which is unsafe")?
Language	Term	Location (doc page)	English	Translation	Observation	EFSA Focal Point
CS	risk	16	to provide scientific and technical assistance, when requested to do so by the Commission, in the crisis management procedures implemented by the Commission with regard to the safety of food and feed;	na žádost Komise poskytovat vědeckou a technickou pomoc v rámci postupů řízení rizika používaných Komisí v souvislosti s bezpečností potravin a krmiv;	Are "crisis management procedures" translated as "risk management procedures" ("postupů řízení rizika používaných")? Is the translation acceptable?
CS	risk	40	a) any measure they adopt which is aimed at restricting the placing on the market or forcing the withdrawal from the market or the recall of food or feed in order to protect human health and requiring rapid action;	a) všechna opatření, která přijmou s cílem omezit uvádění potraviny nebo krmiva na trh nebo prosadit jejich stažení z trhu nebo zpětné převzetí, pokud již byly dodány spotřebitelům, z důvodu ochrany lidského zdraví před rizikem, které vyžaduje rychlé jednání;	Is "in order to protect human health" translated as "for reasons of protection of human health in the face of the risk" ("z důvodu ochrany lidského zdraví před rizikem")? Is the translation acceptable?

## Sheet: REG 852-2004
Old version
Language	Term	Location (doc page)	English	Translation	Observation	EFSA Focal Point
CS	hazard	5	Hazard analysis and critical control points	Analýza rizika a kritické kontrolní body	Is "hazard" translated as "risk ("Analýza rizika") in "hazard food safety hazards"?
CS	hazard	5	(a) identifying any hazards that must be prevented, eliminated or reduced to acceptable levels;	a) v identifikaci všech rizik, kterým musí být předcházeno nebo která musí být vyloučena či omezena na přijatelnou úroveň,	Is "hazard" translated as "risk" ("rizik") in "identifying any hazards"?
CS	hazard	5	(b) identifying the critical control points at the step or steps at which control is essential to prevent or eliminate a hazard or to reduce it to acceptable levels;	b) v identifikaci kritických kontrolních bodů na úrovních, v nichž je kontrola nezbytná pro předcházení riziku, pro jeho vyloučení nebo pro jeho omezení na přijatelnou úroveň	Is "hazard" translated as "risk" ("riziku") in "eliminate a hazard"?
CS	hazard	6	(c) establishing critical limits at critical control points which separate acceptability from unacceptability for the prevention, elimination or reduction of identified hazards;	c) ve stanovení kritických limitů v kritických kontrolních bodech, které s ohledem na předcházení identifikovanému riziku, jeho vyloučení nebo jeho omezení oddělují přijatelnost a nepřijatelnost,	Is "hazard" translated as "risk" ("riziku") in "identified hazards"?
CS	hazard	9	(c) explain the reasons for the adaptation, including, where relevant, by providing a summary of the hazard analysis carried out and any measures to be taken to ensure that the adaptation will not compromise the objectives of this Regulation;	c) vysvětlí důvody pro přizpůsobení a případně předloží souhrn provedené analýzy rizik a všech opatření, která mají být přijata s cílem zajistit, aby přizpůsobení neohrožovalo dosahování cílů tohoto nařízení, a	Is "hazard" translated as "risk" ("riziku") in "hazard analysis"?
CS	hazard	11	3. Notwithstanding the general duty laid down in paragraph 2, food business operators are to comply with appropriate Community and national legislative provisions relating to the control of hazards in primary production and associated operations, including:	3. Aniž jsou dotčeny obecné povinnosti stanovené v bodě 2, musí provozovatelé potravinářských podniků dodržovat příslušné právní předpisy Společenství a vnitrostátní právní předpisy týkající se omezování rizik v prvovýrobě a souvisejících postupech, včetně	Is "hazards" translated as "risk" ("rizik") in "control of hazards"?
CS	hazard	12	7. Food business operators are to keep and retain records relating to measures put in place to control hazards in an appropriate manner and for an appropriate period, commensurate with the nature and size of the food business. Food business operators are to make relevant information contained in these records available to the competent authority and receiving food business operators on request.	7. Provozovatelé potravinářských podniků vedou a uchovávají vhodným způsobem a po přiměřenou dobu záznamy o opatřeních přijatých pro omezování rizik odpovídajících typu a velikosti potravinářského podniku. Provozovatelé potravinářských podniků zpřístupní příslušné informace z těchto záznamů příslušnému orgánu a provozovatelům potravinářských podniků, kteří jsou jejich odběrateli, na jejich žádost.	Is "hazards" translated as "risk" ("rizicích") in "control hazards"?
CS	hazard	17	5. Steam used directly in contact with food is not to contain any substance that presents a hazard to health or is likely to contaminate the food.	5. Pára používaná v přímém styku s potravinou nesmí obsahovat žádnou látku, která představuje zdravotní riziko nebo může potravinu kontaminovat.	Is "hazard" translated as "risk" ("riziko") in "hazard to health"?
Language	Term	Location (doc page)	English	Translation	Observation	EFSA Focal Point
CS	risk	-	-	-	-
New version
Language	Term	Location (doc page)	English	Translation	Observation	EFSA Focal Point
CS	hazard	5	Hazard analysis and critical control points	Analýza rizika a kritické kontrolní body	Is "hazard analysis" translated as "risk analysis" ("Analýza rizika")?
CS	hazard	5	(a) identifying any hazards that must be prevented, eliminated or reduced to acceptable levels;	a) v identifikaci všech rizik, kterým musí být předcházeno nebo která musí být vyloučena či omezena na přijatelnou úroveň,	Is "hazard" translated as "risk" ("rizik")?
CS	hazard	5	(b) identifying the critical control points at the step or steps at which control is essential to prevent or eliminate a hazard or to reduce it to acceptable levels;	a) v identifikaci všech rizik, kterým musí být předcházeno nebo která musí být vyloučena či omezena na přijatelnou úroveň,	Is "hazard" translated as "risk" ("riziku")?
CS	hazard	5	(c) establishing critical limits at critical control points which separate acceptability from unacceptability for the prevention, elimination or reduction of identified hazards;	c) ve stanovení kritických limitů v kritických kontrolních bodech, které s ohledem na předcházení identifikovanému riziku, jeho vyloučení nebo jeho omezení oddělují přijatelnost a nepřijatelnost,	Is "hazard" translated as "risk" ("riziku")?
CS	hazard	11	(c) explain the reasons for the adaptation, including, where relevant, by providing a summary of the hazard analysis carried out and any measures to be taken to ensure that the adaptation will not compromise the objectives of this Regulation;	c) vysvětlí důvody pro přizpůsobení a případně předloží souhrn provedené analýzy rizik a všech opatření, která mají být přijata s cílem zajistit, aby přizpůsobení neohrožovalo dosahování cílů tohoto nařízení, a	Is "hazard" translated as "risk" ("riziku")?
CS	hazard	14	3. Notwithstanding the general duty laid down in paragraph 2, food business operators are to comply with appropriate Community and national legislative provisions relating to the control of hazards in primary production and associated operations, including:	3. Aniž jsou dotčeny obecné povinnosti stanovené v bodě 2, musí provozovatelé potravinářských podniků dodržovat příslušné právní předpisy Společenství a vnitrostátní právní předpisy týkající se omezování rizik v prvovýrobě a souvisejících postupech, včetně	Is "hazards" translated as "risk" ("rizik")?
CS	hazard	15	7. Food business operators are to keep and retain records relating to measures put in place to control hazards in an appropriate manner and for an appropriate period, commensurate with the nature and size of the food business. Food business operators are to make relevant information contained in these records available to the competent authority and receiving food business operators on request.	7. Provozovatelé potravinářských podniků vedou a uchovávají vhodným způsobem a po přiměřenou dobu záznamy o opatřeních přijatých pro omezování rizik odpovídajících typu a velikosti potravinářského podniku. Provozovatelé potravinářských podniků zpřístupní příslušné informace z těchto záznamů příslušnému orgánu a provozovatelům potravinářských podniků, kteří jsou jejich odběrateli, na jejich žádost.	Is "hazards" translated as "risk" ("rizicích") in "control hazards"?
CS	hazard	22	5. Steam used directly in contact with food is not to contain any substance that presents a hazard to health or is likely to contaminate the food.	5. Pára používaná v přímém styku s potravinou nesmí obsahovat žádnou látku, která představuje zdravotní riziko nebo může potravinu kontaminovat.	Is "hazard" translated as "risk" ("riziko") in "hazard to health"?
Language	Term	Location (doc page)	English	Translation	Observation	EFSA Focal Point
CS	risk	-	-	-	-	-

## Sheet: REG 853-2004
Old version
Language	Term	Location (doc page)	English	Translation	Observation	EFSA Focal Point
CS	hazard	1	(2) Certain foodstuffs may present specific hazards to human health, requiring the setting of specific hygiene rules. This is particularly the case for food of animal origin, in which microbiological and chemical hazards have frequently been reported.	(2) Určité potraviny mohou představovat zvláštní rizika pro lidské zdraví, a vyžadují tedy stanovení zvláštních hygienických pravidel. To platí zejména pro potraviny živočišného původu, u nichž jsou často hlášena mikrobiologická a chemická rizika.	Is "hazard" translated as "risk" ("rizika") in "microbiological and chemical hazards"?
CS	hazard	1	(7) The requirement in Regulation (EC) No /2004 ∗ whereby food business operators carrying out any stage of production, processing and distribution of food after primary production and associated operations must put in place, implement and maintain procedures based on hazard analysis and critical control point (HACCP) principles also permits simplification.	(7) Zjednodušení je umožněno také požadavkem nařízení (ES) č. 852/2004, podle něhož musí provozovatelé potravinářských podniků provádějící činnosti v jakékoli fázi výroby, zpracování a distribuce potravin navazující na prvovýrobu a související postupy zavést postupy založené na analýze rizik a zásadách kritických kontrolních bodů (HACCP), provádět a udržovat je.	Is "hazard" translated as "risk" ("rizika") in "hazard analysis"?
CS	hazard	2	(22) In order to ensure proper inspection of hunted wild game placed on the Community market, bodies of hunted animals and their viscera should be presented for official post-mortem nspection at a game-handling establishment. However, to preserve certain hunting traditions without prejudicing food safety, it is appropriate to provide for training for hunters who place wild game on the market for …	(22) S cílem zajistit řádnou kontrolu ulovené volně žijící zvěře uváděné na trh Společenství by měla být těla ulovených zvířat a jejich vnitřnosti předloženy k úřední prohlídce po porážce v zařízení pro zpracování zvěřiny. Aby však byly zachovány určité myslivecké (lovecké) tradice a nebyla ohrožena bezpečnost potravin, je vhodné zajistit školení myslivců (lovců), kteří uvádějí volně žijící zvěř …	Is "hazard" translated as "risk" ("riziko") in "identify no anomalies or hazards"?
CS	hazard	8	(c) explain the reasons for the adaptation, including, where relevant, by providing a summary of the hazard analysis carried out and any measures to be taken to ensure that the adaptation will not compromise the objectives of this Regulation;	c) vysvětlí důvody pro přizpůsobení a případně předloží souhrn provedené analýzy rizika a všech opatření, která mají být přijata s cílem zajistit, aby přizpůsobení neohrozilo cíle tohoto nařízení,	Is "hazard" translated as "risk" ("riziko") in "hazard analysis"?
CS	hazard	9	8) to specify criteria for determining when epidemiological data indicate that a fishing ground does not present a health hazard with regard to the presence of parasites and, consequently, for determining when the competent authority may authorise food business operators not to freeze fishery products in accordance with Annex III, Section VIII, Chapter III, Part D;	8. upřesnit kritéria, podle kterých lze stanovit, kdy podle epidemiologických údajů nepředstavuje rybolovný revír zdravotní riziko, pokud jde o přítomnost parazitů, a podle kterých tedy může příslušný orgán povolit, aby provozovatelé potravinářských podniků nemuseli podle části D kapitoly III oddílu VIII přílohy III zmrazovat produkty rybolovu;	Is "hazard" translated as "risk" ("riziko")?
CS	hazard	46	1. Food business operators operating slaughterhouses must ensure that the procedures that they have put in place in accordance with the general requirements of Article 5 of Regulation (EC) No 852/2004 meet the requirements that the hazard analysis shows to be necessary and the specific requirements listed in point 2	1. Provozovatelé potravinářských podniků provozující jatky se musí ujistit, že postupy, které zavedli v souladu s obecnými požadavky článku 5 nařízení (ES) č. 852/2004, splňují požadavky, které jsou podle analýzy rizika nezbytné, a zvláštní požadavky uvedené v bodě 2.	Is "hazard" translated as "risk" ("riziko")?
CS	risk	46	(i) there are epidemiological data available indicating that the fishing grounds of origin do not present a health hazard with regard to the presence of parasites; and	a) jsou k dispozici epidemiologické údaje, podle kterých rybolovný revír, z něhož produkty pocházejí, nepředstavuje zdravotní riziko, pokud jde o přítomnost parazitů,	Is "hazard" translated as "risk" ("riziko") in "health hazard"?
CS	risk	54	5. After breaking, each particle of the liquid egg must undergo processing as quickly as possible to eliminate microbiological hazards or to reduce them to an acceptable level. A batch that has been insufficiently processed may immediately undergo processing again in the same establishment if this processing renders it fit for human consumption. Where a batch is found to be unfit for human consum…	5. Po vytlučení musí být všechny složky vejce zpracovány co nejdříve, aby se vyloučilo mikrobiologické riziko nebo aby se snížilo na přijatelnou úroveň. Šarže, která byla nedostatečně zpracována, může být ihned opět zpracována v tomtéž zařízení, pokud ji toto zpracování učiní vhodnou pro lidskou spotřebu. Prokáže-li se, že tato šarže není vhodná k lidské spotřebě, musí být denaturována, aby bylo …	Is "hazard" translated as "risk" ("riziko") in "microbiological hazards"?
CS	risk	55	4. Frogs and snails must be subjected to an organoleptic examination carried out by sampling. If that examination indicates that they might present a hazard, they must not be used for human consumption.	4. U žab a hlemýžďů musí být provedeno vyšetření organoleptických vlastností na odebraných vzorcích. Pokud se při tomto vyšetření zjistí, že mohou představovat riziko, nesmí být použiti k lidské spotřebě.	Is "hazard" translated as "risk" ("riziko") in "present a hazard"?
CS	risk	55	6. After killing, snails' hepato-pancreas must, if it might present a hazard, be removed and not be used for human consumption.	6. Po usmrcení musí být hlemýžďům odstraněn hepatopankreas, pokud by mohl přestavovat riziko, a nesmí být použit k lidské spotřebě.	Is "hazard" translated as "risk" ("riziko") in "present a hazard"?
Language	Term	Location (doc page)	English	Translation	Observation	EFSA Focal Point
CS	risk	29	(a) the animals cannot be transported, to avoid any risk for the handler or to protect the welfare of the animals;	a) zvířata nelze přepravovat, aby nebyla ohrožena obsluha nebo aby byly chráněny dobré životní podmínky zvířat;	Is "risk" translated as "threat" ("ohrožena")? Is this translation acceptable?
New version
Language	Term	Location (doc page)	English	Translation	Observation	EFSA Focal Point
CS	H-R	12	(c) explain the reasons for the adaptation, including, where relevant, by providing a summary of the hazard analysis carried out and any measures to be taken to ensure that the adaptation will not compromise the objectives of this Regulation;	c) vysvětlí důvody pro přizpůsobení a případně předloží souhrn provedené analýzy rizika a všech opatření, která mají být přijata s cílem zajistit, aby přizpůsobení neohrozilo cíle tohoto nařízení,	Is "hazard" translated as "risk" ("rizika")? Is this translation acceptable?
CS	H-R	21	1. Food business operators operating slaughterhouses must ensure that the procedures that they have put in place in accordance with the general requirements of Article 5 of Regulation (EC) No 852/2004 meet the requirements that the hazard analysis shows to be necessary and the specific requirements listed in point 2.	1. Provozovatelé potravinářských podniků provozující jatky se musí ujistit, že postupy, které zavedli v souladu s obecnými požadavky článku 5 nařízení (ES) č. 852/2004, splňují požadavky, které jsou podle analýzy rizika nezbytné, a zvláštní požadavky uvedené v bodě 2.	Is "hazard" translated as "risk" ("rizika")? Is this translation acceptable?
Language	Term	Location (doc page)	English	Translation	Observation	EFSA Focal Point
CS	risk	-	-	-	-

## Sheet: REG 625-2017
Old version
Language	Term	Location (doc page)	English	Translation	Observation	EFSA Focal Point
CS	hazard	29	(d) an assessment of procedures on good manufacturing practices, good hygiene practices, good farming practices, and of procedures based on the principles of hazard analysis critical control points (HACCP);	(d) posouzení postupů pro správnou výrobní praxi, správnou hygienickou praxi a správnou zemědělskou praxi a postupů založených na zásadách analýzy rizik a kritických kontrolních bodů (HACCP);	Is "hazard" translated as "risk" ("rizik") in "hazard analysis"?
Language	Term	Location (doc page)	English	Translation	Observation	EFSA Focal Point
CS	risk	-	-	-	-	-
New version
Language	Term	Location (doc page)	English	Translation	Observation	EFSA Focal Point
CS	hazard	18	(d) an assessment of procedures on good manufacturing practices, good hygiene practices, good farming practices, and of procedures based on the principles of hazard analysis critical control points (HACCP);	(d) posouzení postupů pro správnou výrobní praxi, správnou hygienickou praxi a správnou zemědělskou praxi a postupů založených na zásadách analýzy rizik a kritických kontrolních bodů (HACCP);	Is "hazard" translated as "risk" ("rizik") in "hazard analysis"?
Language	Term	Location (doc page)	English	Translation	Observation	EFSA Focal Point
CS	risk	-	-	-	-	-

## Sheet: REG 1381-2019
Single version
Language	Term	Location (doc page)	English	Translation	Observation	EFSA Focal Point
CS	hazard	3	Authorisation procedures are based on the principle that it is for the applicant or the notifier to prove that the subject matter of an application or notification complies with Union requirements. That principle is based on the premise that human health, animal health and, where relevant, the environment are better protected where the burden of proof is on the applicant or the notifier since it …	Postupy povolování jsou založeny na zásadě, že je na žadateli nebo oznamovateli, aby prokázal, že předmět žádosti či oznámení splňuje požadavky Unie. Tato zásada vychází z předpokladu, že lidské zdraví, zdraví zvířat a případně životní prostředí, jsou lépe chráněny, pokud důkazní břemeno nese žadatel nebo oznamovatel, neboť ten musí prokázat, že předmět uvedený v jeho žádosti nebo oznámení je bez…	Is "unsafe" translated as "hazard" (" nebezpečný")?
Language	Term	Location (doc page)	English	Translation	Observation	EFSA Focal Point
CS	risk	3	-	-	-	-
