# Supplementary material for: Food Risk Analysis: Towards a Better Understanding of „Hazard” and „Risk” in EU food legislation
Source: Preprints.org preprint supplement (doi:10.20944/preprints202306.1556.v1), 2023-06-21
Supplement: Supplementary file 5 [file DA.xlsx]

## Sheet: REG 178-2002
Old version
Language	Term	Location (doc page)	English	Translation	Observation	EFSA Focal Point
DA	hazard	2	(15) Networking of laboratories of excellence, at regional and/or interregional level, with the aim of ensuring continuous monitoring of food safety, could play an important role in the prevention of potential health risks for citizens.	(15) Netværk af ansete laboratorier på regionalt og/eller interregionalt plan, som skal sikre konstant overvågning af fødevaresikkerheden, vil kunne spille en vigtig rolle i forebyggelsen af mulige sundhedsfarer for borgerne.	Is "risk" translated as "hazard"("fødevaresikkerheden") in "health risks"?
DA	hazard	3	(28) Experience has shown that the functioning of the internal market in food or feed can be jeopardised where it is impossible to trace food and feed. It is therefore necessary to establish a comprehensive system of traceability within food and feed businesses so that targeted and accurate withdrawals can be undertaken or information given to consumers or control officials, thereby avoiding the …	(28) Erfaringen viser, at det indre marked for fødevarer eller foder kan bringes i fare, hvis det er umuligt at spore fødevarer og foder. Det er derfor nødvendigt at indføre et omfattende sporingssystem inden for fødevare-og foderstofvirksomheder, således at der i tilfælde af fødevaresikkerhedsproblemer kan iværksættes målrettet og præcis tilbagetrækning fra markedet, eller således at forbrugerne…	Is "jeoperdised" translated with the word for "hazard" ("fare")? Is the translation acceptable?
DA	hazard	5	(59) A system for rapid alert already exists in the framework of Council Directive 92/59/EEC of 29 June 1992 on general product safety (1). The scope of the existing system includes food and industrial products but not feed. Recent food crises have demonstrated the need to set up an improved and broadened rapid alert system covering food and feed. This revised system should be managed by the Comm…	(59) Der eksisterer allerede et hurtigt varslingssystem inden for rammerne af Rådets direktiv 92/59/EØF af 29. juni 1992 om produktsikkerhed i almindelighed (1). Anvendelsesområdet for det eksisterende system omfatter fødevarer og industriprodukter, men ikke foder. Den seneste fødevarekrise har vist, at der er behov for at indføre et forbedret og udvidet system for hurtig varsling omfattende føde…	Is "emergency" translated as "hazard" ("strålingsfare) in "radiological emergency"? Is the translation acceptable?
Language	Term	Location (doc page)	English	Translation	Observation	EFSA Focal Point
DA	risk	4	(44) The Authority should cooperate closely with competent bodies in the Member States if it is to operate effectively. An Advisory Forum should be created in order to advise the Executive Director, to constitute a mechanism of exchange of information, and to ensure close cooperation in particular with regard to the networking system. Cooperation and appropriate exchange of information should als…	(44) Autoriteten bør, for at den kan fungere effektivt, samarbejde snævert med de kompetente myndigheder i medlemsstaterne. Der bør oprettes et rådgivende forum, som skal rådgive den administrerende direktør, formidle udveksling af oplysninger og sikre et tæt samarbejde, navnlig i relation til netværkssystemet. Samarbejde og passende udveksling af oplysninger bør også begrænse risikoen for diverg…	Is "minimise the potential of diverging" translated as "limit the risk of diverging" (" begrænse risikoen for divergerende")? Is the translation acceptable?
New version
Language	Term	Location (doc page)	English	Translation	Observation	EFSA Focal Point
DA	hazard	-	-	-	-	-
Language	Term	Location (doc page)	English	Translation	Observation	EFSA Focal Point
DA	risk	-	-	-	-	-

## Sheet: REG 852-2004
Old version
Language	Term	Location (doc page)	English	Translation	Observation	EFSA Focal Point
DA	hazard	4	(10) Food hazards present at the level of primary production should be identified and adequately controlled to ensure the achievement of the objectives of this Regulation. However, in the case of the direct supply of small quantities of primary products, by the food business operator producing them, to the final consumer or to a local retail establishment, it is appropriate to protect public heal…	(10) De fødevarerisici, der findes i primærproduktionen, bør identificeres og kontrolleres, så det sikres, at målene i forordningen nås. For så vidt angår direkte levering af små mængder primærprodukter fra fødevarevirksomheden til den endelige forbruger eller en lokal detailvirksomhed, er det hensigtsmæssigt at beskytte folkesundheden gennem national lovgivning, især på grund af det nære forhold…	Is "hazard" translated as "risk" ("fødevarerisici") in "food hazards"?
DA	hazard	4	(11) The application of hazard analysis and critical control point (HACCP) principles to primary production is not yet generally feasible. However, guides to good practice should encourage the use of appropriate hygiene practices at farm level. Where necessary, specific hygiene rules for primary production should supplement these guides. It is appropriate for the hygiene requirements applicable t…	(11) Det er endnu ikke praktisk muligt generelt at anvende principperne om risikoanalyse og kritiske kontrolpunkter (HACCP) i primærproduktionen. Imidlertid bør retningslinjer for god praksis tilskynde til hensigtsmæssig hygiejnemæssig praksis på bedriftsplan. Særlige hygiejnebestemmelser vedrørende primærproduktionen bør om fornødent supplere disse retningslinjer. Det er hensigtsmæssigt, at de h…	Is "hazard" translated as "risk" ("risikoanalyse") in "hazard analysis"?
DA	hazard	10	(a) ‘food hygiene’, hereinafter called ‘hygiene’, means the measures and conditions necessary to control hazards and to ensure fitness for human consumption of a foodstuff taking into account its intended use;	a) »fødevarehygiejne«, i det følgende benævnt »hygiejne«: foranstaltninger og betingelser, der er nødvendige for at kontrollere risici ogsikre, at en fødevare er egnet til konsum, hvis den anvendes som tilsigtet	Is "hazard" translated as "risk" ("risiko") in "control hazards"?
DA	hazard	11	(f) ‘contamination’ means the presence or introduction of a hazard	f) »kontaminering«: forekomst eller opståen af en risiko	Is "hazard" translated as "risk" ("risiko") in "introduction of a hazard"?
DA	hazard	15	Hazard analysis and critical control points	Risikoanalyse og kritiske kontrolpunkter	Is "hazard analysis" translated as "risk analysis" ("Risikoanalyse")?
DA	hazard	15	(a) identifying any hazards that must be prevented, eliminated or reduced to acceptable levels;	a) identificere risici, som skal forebygges, fjernes eller reduceres til et acceptabelt niveau	Is "hazards" translated as "risk" ("risici") in "any hazards"?
DA	hazard	15	(b) identifying the critical control points at the step or steps at which control is essential to prevent or eliminate a hazard or to reduce it to acceptable levels;	b) identificere de kritiske kontrolpunkter på det eller de produktionstrin, hvor det er vigtigt at have produktionen under kontrol for at forebygge eller fjerne en risiko eller reducere den til et acceptabelt niveau	Is "hazard" translated as "risk" ("risiko") in "eliminate a hazard"?
DA	hazard	16	(c) establishing critical limits at critical control points which separate acceptability from unacceptability for the prevention, elimination or reduction of identified hazards;	c) fastsætte kritiske grænser på kritiske kontrolpunkter, som adskiller acceptable forhold fra uacceptable forhold, med henblik på at forebygge, fjerne eller reducere identificerede risici	Is "hazards" translated as "risk" ("risici") in "identified hazards"?
DA	hazard	26	(c) explain the reasons for the adaptation, including, where relevant, by providing a summary of the hazard analysis carried out and any measures to be taken to ensure that the adaptation will not compromise the objectives of this Regulation;	c) en begrundelse for tilpasningen, herunder, når det er relevant, en sammenfatning af den gennemførte risikoanalyse, og af alle foranstaltninger, der skal træffes for at sikre, at tilpasningen ikke tilsidesætter forordningens mål,	Is "hazard analysis" translated as "risk analysis" ("Risikoanalyse") in "hazard analysis"?
DA	hazard	32	3. Notwithstanding the general duty laid down in paragraph 2, food business operators are to comply with appropriate Community and national legislative provisions relating to the control of hazards in primary production and associated operations, including:	3. Uanset den generelle forpligtelse i punkt 2 skal ledere af en fødevarevirksomhed overholde de relevante bestemmelser i EF-lovgivningen og den nationale lovgivning om kontrol med risici inden for primærproduktion og dermed forbundne aktiviteter, herunder:	Is "hazards" translated as "risk" ("risici") in "control of hazards"?
DA	hazard	35	7. Food business operators are to keep and retain records relating to measures put in place to control hazards in an appropriate manner and for an appropriate period, commensurate with the nature and size of the food business. Food business operators are to make relevant information contained in these records available to the competent authority and receiving food business operators on request	7. Ledere af fødevarevirksomheder skal føre og opbevare journaler over foranstaltninger, som er truffet for at kontrollere fødevarerisici på en passende måde og i et passende tidsrum, og som svarer til virksomhedens art og størrelse. Virksomhedslederne skal på begæring stille de relevante oplysninger i sådanne journaler til rådighed for den kompetente myndighed og den fødevarevirksomhed, der modt…	Is "hazards" translated as "risks" in ("fødevarerisici") in "control hazards"?
DA	hazard	37	1. National and Community guides referred to in Articles 7 to 9 of this Regulation should contain guidance on good hygiene practice for the control of hazards in primary production and associated operations.	1. Nationale retningslinjer og EF-retningslinjer som omhandlet i artikel 7-9 I denne forordning bør indeholde en vejledning i god hygiejnepraksis for kontrol med risici inden for primærproduktion og dermed forbundne aktiviteter	Is "hazards" translated as "risk" ("risici") in "control of hazards"?
DA	hazard	37	2. Guides to good hygiene practice should include appropriate information on hazards that may arise in primary production and associated operations and actions to control hazards, including relevant measures set out in Community and national legislation or national and Community programmes. Examples of such hazards and measures may include:	2. Retningslinjerne for god hygiejnepraksis bør omfatte passende oplysninger om risici, der kan opstå inden for primærproduktion og dermed forbundne aktiviteter, og foranstaltninger til kontrol med risici, herunder relevante foranstaltninger i EF-lovgivningen og den nationale lovgivning eller nationale programmer og EF-programmer. Sådanne risici og foranstaltninger kan f. eks. være:	Is "hazards" translated as "risk" ("risici") in "control hazards" and "such hazards"?
Language	Term	Location (doc page)	English	Translation	Observation	EFSA Focal Point
DA	risk	50	2. No person suffering from, or being a carrier of a disease likely to be transmitted through food or afflicted, for example, with infected wounds, skin infections, sores or diarrhoea is to be permitted to handle food or enter any food-handling area in any capacity if there is any likelihood of direct or indirect contamination. Any person so affected and employed in a food business and who is lik…	2. Ingen, som lider af eller er bærer af en sygdom, der kan overføres gennem fødevarer, eller som f.eks. har inficerede sår, hudinfektioner, almindelige sår eller diarré, må håndtere fødevarer eller have adgang til et sted, hvor der håndteres fødevarer, hvis der er nogen risiko for direkte eller indirekte kontaminering. En person med ovennævnte lidelser, der er ansat i en fødevarevirksomhed, og s…	Is "likelihood of direct and indirect contamination" translated as risk of direct and indirect contamination" ("risiko for direkte eller indirekte kontaminering")? Is the tranlsation acceptable? Should it be translated "sandsynligheden for direkte og indirekte kontaminering" or in another way?
DA	risk	51	5. Raw materials, ingredients, intermediate products and finished products likely to support the reproduction of pathogenic micro-organisms or the formation of toxins are not to be kept at temperatures that might result in a risk to health. The cold chain is not to be interrupted. However, limited periods outside temperature control are permitted, to accommodate the practicalities of handling dur…	5. Råvarer, ingredienser, halvfabrikata og færdigvarer, som kan fremme reproduktion af patogene mikroorganismer eller dannelse af toksiner, må ikke opbevares ved temperaturer, der kan medføre sundhedsfare. Kølekæden må ikke afbrydes. Der kan dog tillades korte perioder uden temperaturkontrol, når det af praktiske hensyn er nødvendigt under håndtering i forbindelse med tilberedning, transport, opb…	Is "risk" translated as "hazard" ("sundhedsfare") in "risk to health"?
DA	risk	51	6. Where foodstuffs are to be held or served at chilled temperatures they are to be cooled as quickly as possible following the heat-processing stage, or final preparation stage if no heat process is applied, to a temperature which does not result in a risk to health.	6. Hvis fødevarer skal opbevares eller serveres ved lave temperaturer, skal de snarest muligt efter varmebehandlingen eller den endelige tilberedning, hvis der ikke foretages varmebehandling, nedkøles til en temperatur, som ikke indebærer nogen sundhedsfare.	Is "risk" translated as "hazard" ("sundhedsfare") in "risk to health"?
DA	risk	52	7. The thawing of foodstuffs is to be undertaken in such a way as to minimise the risk of growth of pathogenic microorganisms or the formation of toxins in the foods. During thawing, foods are to be subjected to temperatures that would not result in a risk to health. Where run-off liquid from the thawing process may present a risk to health it is to be adequately drained. Following thawing, food …	6. Hvis fødevarer skal opbevares eller serveres ved lave temperaturer, skal de snarest muligt efter varmebehandlingen eller den endelige tilberedning, hvis der ikke foretages varmebehandling, nedkøles til en temperatur, som ikke indebærer nogen sundhedsfare.	Is "risk" translated as "hazard" ("sundhedsfare") in "risk to health"?
New version
Language	Term	Location (doc page)	English	Translation	Observation	EFSA Focal Point
DA	hazard	3	(a) ‘food hygiene’, hereinafter called ‘hygiene’, means the measures and conditions necessary to control hazards and to ensure fitness for human consumption of a foodstuff taking into account its intended use;	a) »fødevarehygiejne«, i det følgende benævnt »hygiejne«: foranstaltninger og betingelser, der er nødvendige for at kontrollere risici ogsikre, at en fødevare er egnet til konsum, hvis den anvendes som tilsigtet	Is "hazards" translated as "risks" ("risiko") in "control hazards"?
DA	hazard	3	(f) ‘contamination’ means the presence or introduction of a hazard	f) »kontaminering«: forekomst eller opståen af en risiko	Is "hazard" translated as "risk" ("risiko")?
DA	hazard	5	Hazard analysis and critical control points	Risikoanalyse og kritiske kontrolpunkter	Is "hazard" translated as "risk" ("Risikoanalyse") in "hazard analysis"?
DA	hazard	5	(a) identifying any hazards that must be prevented, eliminated or reduced to acceptable levels;	a) identificere risici, som skal forebygges, fjernes eller reduceres til et acceptabelt niveau	Is "hazards" translated as "risk" ("risici") in "any hazards"?
DA	hazard	5	(b) identifying the critical control points at the step or steps at which control is essential to prevent or eliminate a hazard or to reduce it to acceptable levels;	b) identificere de kritiske kontrolpunkter på det eller de produktionstrin, hvor det er vigtigt at have produktionen under kontrol for at forebygge eller fjerne en risiko eller reducere den til et acceptabelt niveau	Is "hazard" translated as "risk" ("risiko") in "eliminate a hazard"?
DA	hazard	5	(c) establishing critical limits at critical control points which separate acceptability from unacceptability for the prevention, elimination or reduction of identified hazards;	c) fastsætte kritiske grænser på kritiske kontrolpunkter, som adskiller acceptable forhold fra uacceptable forhold, med henblik på at forebygge, fjerne eller reducere identificerede risici	Is "hazards" translated as "risk" ("risici") in "identified hazards"?
DA	hazard	11	(c) explain the reasons for the adaptation, including, where relevant, by providing a summary of the hazard analysis carried out and any measures to be taken to ensure that the adaptation will not compromise the objectives of this Regulation;	c) en begrundelse for tilpasningen, herunder, når det er relevant, en sammenfatning af den gennemførte risikoanalyse, og af alle foranstaltninger, der skal træffes for at sikre, at tilpasningen ikke tilsidesætter forordningens mål,	Is "hazard" translated as "risk" ("Risikoanalyse") in "hazard analysis"?
DA	hazard	14	3. Notwithstanding the general duty laid down in paragraph 2, food business operators are to comply with appropriate Community and national legislative provisions relating to the control of hazards in primary production and associated operations, including:	3. Uanset den generelle forpligtelse i punkt 2 skal ledere af en fødevarevirksomhed overholde de relevante bestemmelser i EF-lovgivningen og den nationale lovgivning om kontrol med risici inden for primærproduktion og dermed forbundne aktiviteter, herunder:	Is "hazards" translated as "risk" ("risici") in "control of hazards"?
DA	hazard	15	7. Food business operators are to keep and retain records relating to measures put in place to control hazards in an appropriate manner and for an appropriate period, commensurate with the nature and size of the food business. Food business operators are to make relevant information contained in these records available to the competent authority and receiving food business operators on request	7. Ledere af fødevarevirksomheder skal føre og opbevare journaler over foranstaltninger, som er truffet for at kontrollere fødevarerisici på en passende måde og i et passende tidsrum, og som svarer til virksomhedens art og størrelse. Virksomhedslederne skal på begæring stille de relevante oplysninger i sådanne journaler til rådighed for den kompetente myndighed og den fødevarevirksomhed, der modt…	Is "hazards" translated as "risks" ("fødevarerisici") in "control hazards"?
DA	hazard	16	1. National and Community guides referred to in Articles 7 to 9 of this Regulation should contain guidance on good hygiene practice for the control of hazards in primary production and associated operations.	1. Nationale retningslinjer og EF-retningslinjer som omhandlet i artikel 7-9 I denne forordning bør indeholde en vejledning i god hygiejnepraksis for kontrol med risici inden for primærproduktion og dermed forbundne aktiviteter	Is "hazards" translated as "risk" ("risici") in "control of hazards"?
DA	hazard	16	2. Guides to good hygiene practice should include appropriate information on hazards that may arise in primary production and associated operations and actions to control hazards, including relevant measures set out in Community and national legislation or national and Community programmes. Examples of such hazards and measures may include:	2. Retningslinjerne for god hygiejnepraksis bør omfatte passende oplysninger om risici, der kan opstå inden for primærproduktion og dermed forbundne aktiviteter, og foranstaltninger til kontrol med risici, herunder relevante foranstaltninger i EF-lovgivningen og den nationale lovgivning eller nationale programmer og EF-programmer. Sådanne risici og foranstaltninger kan f. eks. være:	Is "hazards" translated as "risk" ("risici") in "information on hazards"?
Language	Term	Location (doc page)	English	Translation	Observation	EFSA Focal Point
DA	risk	22	2. No person suffering from, or being a carrier of a disease likely to be transmitted through food or afflicted, for example, with infected wounds, skin infections, sores or diarrhoea is to be permitted to handle food or enter any food-handling area in any capacity if there is any likelihood of direct or indirect contamination. Any person so affected and employed in a food business and who is lik…	2. Ingen, som lider af eller er bærer af en sygdom, der kan overføres gennem fødevarer, eller som f.eks. har inficerede sår, hudinfektioner, almindelige sår eller diarré, må håndtere fødevarer eller have adgang til et sted, hvor der håndteres fødevarer, hvis der er nogen risiko for direkte eller indirekte kontaminering. En person med ovennævnte lidelser, der er ansat i en fødevarevirksomhed, og s…	Is "likelihood of direct and indirect contamination" translated as risk of direct and indirect contamination" ("risiko for direkte eller indirekte kontaminering")? Is it acceptable? Should it be translated "sandsynligheden for direkte og indirekte kontaminering" or in another way?
DA	risk	23	5. Raw materials, ingredients, intermediate products and finished products likely to support the reproduction of pathogenic micro-organisms or the formation of toxins are not to be kept at temperatures that might result in a risk to health. The cold chain is not to be interrupted. However, limited periods outside temperature control are permitted, to accommodate the practicalities of handling dur…	5. Råvarer, ingredienser, halvfabrikata og færdigvarer, som kan fremme reproduktion af patogene mikroorganismer eller dannelse af toksiner, må ikke opbevares ved temperaturer, der kan medføre sundhedsfare. Kølekæden må ikke afbrydes. Der kan dog tillades korte perioder uden temperaturkontrol, når det af praktiske hensyn er nødvendigt under håndtering i forbindelse med tilberedning, transport, opb…	Is "risk" translated as "hazard" ("sundhedsfare") in "risk to health"?
DA	risk	23	6. Where foodstuffs are to be held or served at chilled temperatures they are to be cooled as quickly as possible following the heat-processing stage, or final preparation stage if no heat process is applied, to a temperature which does not result in a risk to health.	6. Hvis fødevarer skal opbevares eller serveres ved lave temperaturer, skal de snarest muligt efter varmebehandlingen eller den endelige tilberedning, hvis der ikke foretages varmebehandling, nedkøles til en temperatur, som ikke indebærer nogen sundhedsfare.	Is "risk" translated as "hazard" ("sundhedsfare") in "risk to health"?
DA	risk	23	7. The thawing of foodstuffs is to be undertaken in such a way as to minimise the risk of growth of pathogenic microorganisms or the formation of toxins in the foods. During thawing, foods are to be subjected to temperatures that would not result in a risk to health. Where run-off liquid from the thawing process may present a risk to health it is to be adequately drained. Following thawing, food …	7. Fødevarer skal optøs på en sådan måde, at der er mindst mulig risiko for vækst af patogene mikroorganismer eller dannelse af toksiner i fødevarerne. Under optøningen skal fødevarerne opbevares ved temperaturer, der ikke medfører sundhedsfare. Dryp fra optøningen, der kan være sundhedsfarlig, skal ledes bort. Efter optøningen skal fødevarerne håndteres på en sådan måde, at der er mindst mulig r…	Is "risk" translated as "hazard" ("sundhedsfare") in "risk to health"?

## Sheet: REG 853-2004
Old version
Language	Term	Location (doc page)	English	Translation	Observation	EFSA Focal Point
DA	hazard	2	(2) Certain foodstuffs may present specific hazards to human health, requiring the setting of specific hygiene rules. This is particularly the case for food of animal origin, in which microbiological and chemical hazards have frequently been reported.	(2) Nogle fødevarer kan udgøre særlige risici for menneskers sundhed, hvorfor der bør fastsættes særlige hygiejnebestemmelser. Dette gælder især animalske fødevarer, i forbindelse med hvilke der har været hyppige indberetninger af mikrobiologiske og kemiske risici.	Is "hazard" translated as "risk" ("risici") in " microbiological and chemical hazards"?
DA	hazard	3	(7) The requirement in Regulation (EC) No /2004 ∗ whereby food business operators carrying out any stage of production, processing and distribution of food after primary production and associated operations must put in place, implement and maintain procedures based on hazard analysis and critical control point (HACCP) principles also permits simplification.	(7) Kravet i forordning (EF) nr. .../2004* om, at ledere af fødevarevirksomheder, der udfører et hvilket som helst stadium i produktionen, forarbejdningen og distributionen af fødevarer efter primærproduktionen og dertil knyttede operationer, skal udarbejde, gennemføre og videreføre procedurer, der bygger på HACCP-principperne (Hazard Analysis Critical Control Point), giver ligeledes mulighed for…	Is "hazard analysis and critical control point (HACCP) translated as "HACCP-principperne (Hazard Analysis Critical Control Point)"? Is the translation acceptable?
DA	hazard	7	(19) Flexibility is appropriate to enable the continued use of traditional methods at any of the stages of production, processing or distribution of food and in relation to structural requirements for establishments. Flexibility is particularly important for regions that are subject to special geographical constraints, including the outermost regions referred to in Article 299(2) of the Treaty. H…	(19) Der er også behov for fleksibilitet for at muliggøre fortsat brug af traditionelle metoder i produktions-, forarbejdnings- eller distributionsleddet og i forbindelse med de strukturelle krav til virksomhederne. Fleksibilitet er af særlig betydning for regioner med særlige geografiske vanskeligheder, herunder regioner i den yderste periferi som omhandlet i traktatens artikel 299, stk. 2. Flek…	Is "compromise food hygiene" translated as "food safety hazard" ("fødevaresikkerheden i fare")? Is the translation acceptable?
DA	hazard	8	(22) In order to ensure proper inspection of hunted wild game placed on the Community market, bodies of hunted animals and their viscera should be presented for official post-mortem inspection at a game-handling establishment. However, to preserve certain hunting traditions without prejudicing food safety, it is appropriate to provide for training for hunters who place wild game on the market for…	(22) For at sikre korrekt inspektion af nedlagt vildtlevende vildt, der markedsføres i Fællesskabet, bør kroppe af nedlagte dyr og deres organer forevises til offentlig inspektion på en vildthåndteringsvirksomhed. For at bevare visse jagttraditioner uden derved at bringe fødevaresikkerheden i fare, er det dog tilstrækkeligt at give adgang til uddannelse for jægere, der markedsfører vildtlevende v…	Is "hazards" translated as "risks" ("risici") in "no anomalies or hazards"?
DA	hazard	12	(c) explain the reasons for the adaptation, including, where relevant, by providing a summary of the hazard analysis carried out and any measures to be taken to ensure that the adaptation will not compromise the objectives of this Regulation;	c) en begrundelse for tilpasningen, bl.a., når det er relevant, en sammenfatning af den gennemførte risikoanalyse, og af alle foranstaltninger, der skal træffes for at sikre, at tilpasningen ikke tilsidesætter denne forordnings målsætninger,	Is "hazard" translated as "risk" in "hazard analysis" ("risikoanalysen")?
DA	hazard	8	(23) This Regulation should establish criteria for raw milk pending the adoption of new requirements for its placing on the market. These criteria should be trigger values, implying that, in the event of any overshooting, food business operators are to take corrective action and to notify the competent authority. The criteria should not be maximum figures beyond which raw milk cannot be placed on…	(23) Denne forordning bør opstille kriterier for rå mælk, indtil der er vedtaget nye krav for markedsføring heraf. Disse kriterier bør være tærskelværdier, hvilket indebærer, at hvis de overskrides, træffer lederne af fødevarevirksomheder korrigerende foranstaltninger og underretter den kompetente myndighed. Kriterierne bør ikke være grænseværdier, hvis overskridelse betyder, at den rå mælk ikke …	Is " safely be used for human consumption" translated as "without risk can be used for human consumption" ("uden risiko kan anvendes til konsum")? Is the translation acceptable?
DA	hazard	26	(c) explain the reasons for the adaptation, including, where relevant, by providing a summary of the hazard analysis carried out and any measures to be taken to ensure that the adaptation will not compromise the objectives of this Regulation; and	c) en begrundelse for tilpasningen, bl.a., når det er relevant, en sammenfatning af den gennemførte risikoanalyse, og af alle foranstaltninger, der skal træffes for at sikre, at tilpasningen ikke tilsidesætter denne forordnings målsætninger, og	Is "hazard" translated as "risk" ("risikoanalysen") in "hazard analysis"?
DA	hazard	43	1. Food business operators operating slaughterhouses must ensure that the procedures that they have put in place in accordance with the general requirements of Article 5 of Regulation (EC) No …/2004 ∗ meet the requirements that the hazard analysis shows to be necessary and the specific requirements listed in paragraph 2.	1. Ledere af fødevarevirksomheder, som driver slagterier, skal sørge for, at de procedurer, som de har indført i overensstemmelse med de generelle krav i artikel 5 i forordning (EF) nr. .../2004*, opfylder de specifikke krav i punkt 2, der ifølge risikoanalysen viser sig at være påkrævede.	Is "hazard" translated as "risk" ("risikoanalysen") in "hazard analysis"?
DA	hazard	49	1. (a) Slaughterhouses must have adequate and hygienic lairage facilities or, climate permitting, waiting pens that are easy to clean and disinfect. These facilities must be equipped for watering the animals and, if necessary, feeding them. The drainage of the wastewater must not compromise food safety.	1. a) slagterier skal have egnede, hygiejniske opstaldningsforhold eller, hvis klimaforholdene tillader det, ventefolde, der er lette at rengøre og desinficere. Anlæggene skal have faciliteter til vanding og om nødvendigt fodring af dyrene. Bortledningen af spildevand må ikke bringe fødevaresikkerheden i fare	Is the word for "hazard" used in "must not compromise food safety" ("må ikke bringe fødevaresikkerheden i fare")? Is the translation acceptable?
DA	hazard	108	6. Where fish are headed and/or gutted on board, such operations must be carried out hygienically as soon as possible after capture, and the fishery products must be washed immediately. The viscera and parts that may constitute a danger to public health must be removed as soon as possible and kept apart from fishery products intended for human consumption. Livers and roes intended for human consu…	6. Hovedskæring og/eller rensning om bord skal foregå på hygiejnisk måde snarest muligt efter fangst, og fiskevarerne skal vaskes omgående. Indvolde og dele, der kan udgøre en fare for folkesundheden, skal fjernes hurtigst muligt og holdes adskilt fra fiskevarer til konsum. Lever, rogn og mælke til konsum skal køles og opbevares i is ved en temperatur, der nærmer sig temperaturen for smeltende is…	Is "danger" translated as "hazard" ("fare")? Is the translation acceptable?
DA	hazard	77	5. After breaking, each particle of the liquid egg must undergo processing as quickly as possible to eliminate microbiological hazards or to reduce them to an acceptable level. A batch that has been insufficiently processed may immediately undergo processing again in the same establishment if this processing renders it fit for human consumption. Where a batch is found to be unfit for human consum…	5. Efter udslåning skal alle det flydende ægs bestanddele forarbejdes snarest muligt for at eliminere mikrobiologiske risici eller reducere dem til et acceptabelt niveau. Et parti, som er blevet forarbejdet utilstrækkeligt, kan omgående underkastes en ny forarbejdning på samme virksomhed, forudsat at denne nye forarbejdning gør det egnet til konsum. Hvis det konstateres, at et parti er uegnet til…	Is "hazard" translated as "risk" (risici") in "microbiological hazards"?
DA	hazard	136	4. Frogs and snails must be subjected to an organoleptic examination carried out by sampling. If that examination indicates that they might present a hazard, they must not be used for human consumption.	4. Der skal foretages en stikprøvevis organoleptisk undersøgelse af frøer og snegle. Hvis undersøgelsen viser, at de udgør en risiko, må de ikke anvendes til konsum	Is "hazard" translated as "risk" (risiko") in "present a hazards"?
DA	hazard	137	6. After killing, snails' hepato-pancreas must, if it might present a hazard, be removed and not be used for human consumption.	6. Snegles hepatopankreas skal fjernes efter aflivning, hvis den udgør en risiko, og må ikke anvendes til konsum.	Is "hazard" translated as "risk" (risiko") in "present a hazards"?
Language	Term	Location (doc page)	English	Translation	Observation	EFSA Focal Point
DA	risk	76	2. The trained person must carry out an examination of the body, and of any viscera removed, to identify any characteristics that may indicate that the meat presents a health risk. The examination must take place as soon as possible after killing.	2. Efter at vildtet er nedlagt, skal en uddannet person undersøge kroppen og udtagne organer for tegn på, at kødet kan være sundhedsfarligt. Undersøgelsen skal foretages snarest muligt efter nedlæggelsen.	Is "risks" translated as "hazardous" ("sundhedsfarligt") in "health risks"?
DA	risk	78	1. The trained person must carry out an examination to identify any characteristics that may indicate that the meat presents a health risk. The examination must take place as soon as possible after killing	1. Den uddannede person skal udføre en undersøgelse for tegn på, at kødet kan være sundhedsfarligt. Undersøgelsen skal foretages snarest muligt efter nedlæggelsen.	Is "risks" translated as "hazardous" ("sundhedsfarligt") in "health risks"?
DA	risk	145	(a) all ruminant bone material derived from animals born, reared or slaughtered in countries or regions classified as having a low incidence of BSE in accordance with Community legislation is subjected to a process which ensures that all bone material is finely crushed and degreased with hot water and treated with dilute hydrochloric acid (at minimum concentration of 4% and pH < 1.5) over a perio…	a) alt knoglemateriale fra drøvtyggere, der er født, opdrættet eller slagtet i lande eller områder, som ifølge EF-retsforskrifterne er klassificeret som udsat for lav BSE-risiko, knuses fint og affedtes med hedt vand og behandles med fortyndet saltsyre (med en minimumskoncentration på 4% og en pH-værdi 12,5) i mindst 20 dage med sterilisering ved 138-140 ºC i fire sekunder, eller en godkendt lige…	Is "low incidence of BSE" translated as "BSE risk" ("BSE-risiko")? Is the translation acceptable?
New version
Language	Term	Location (doc page)	English	Translation	Observation	EFSA Focal Point
DA	hazard	18	(d) an assessment of procedures on good manufacturing practices, good hygiene practices, good farming practices, and of procedures based on the principles of hazard analysis critical control points (HACCP);	d) vurdering af procedurer for god fremstillingspraksis, god hygiejnepraksis og godt landmandskab samt af procedurer baseret på HACCP-principperne (Hazard Analysis Critical Control Points)	Is "hazard analysis critical control points (HACCP)" translated as "HACCP principle and in English "Hazard Analysis Critical Control Points" ("HACCP-principperne (Hazard Analysis Critical Control Points)")? It this translation acceptable?
DA	hazard	94	With a view to conducting Union-wide targeted assessment of the state of application of the rules referred to in Article 1(2) or establishing the prevalence of certain hazards across the Union, the Commission may adopt implementing acts concerning:	Med henblik på at foretage en EU-dækkende målrettet vurdering af anvendelsen af de regler, der er omhandlet i artikel 1, stk. 2, eller bestemme prævalensen af visse risici i hele Unionen kan Kommissionen vedtage gennemførelsesretsakter vedrørende:	Was "hazard" translated "risk" ("risici") in "certain hazards"?
DA	hazard	94	(b) the organisation, on an ad hoc basis, of the collection of data and information in relation to the application of a specific set of the rules referred to in Article 1(2) or regarding the prevalence of certain hazards.	b) tilrettelæggelsen på ad hoc-basis af indsamlingen af data og oplysninger i forbindelse med anvendelsen af et bestemt af de regelsæt, der er omhandlet i artikel 1, stk. 2, eller vedrørende prævalensen af visse risici	Was "hazard" translated "risk" ("risici") in "certain hazards"?
Language	Term	Location (doc page)	English	Translation	Observation	EFSA Focal Point
DA	risk	-	-	-	-	-

## Sheet: REG 625-2017
Old version
Language	Term	Location (doc page)	English	Translation	Observation	EFSA Focal Point
DA	hazard	29	(d) an assessment of procedures on good manufacturing practices, good hygiene practices, good farming practices, and of procedures based on the principles of hazard analysis critical control points (HACCP);	d) vurdering af procedurer for god fremstillingspraksis, god hygiejnepraksis og godt landmandskab samt af procedurer baseret på HACCP-principperne (Hazard Analysis Critical Control Points)	Is the "principles of hazard analysis critical control points (HACCP)" translated as "HACCP-principperne" and English "(Hazard Analysis Critical Control Points)"? Is the translation acceptable?
DA	hazard	84	With a view to conducting Union-wide targeted assessment of the state of application of the rules referred to in Article 1(2) or establishing the prevalence of certain hazards across the Union, the Commission may adopt implementing acts concerning:	Med henblik på at foretage en EU-dækkende målrettet vurdering af anvendelsen af de regler, der er omhandlet i artikel 1, stk. 2, eller bestemme prævalensen af visse risici i hele Unionen kan Kommissionen vedtage gennemførelsesretsakter vedrørende:	Is "hazard" translated "risk" ("risici") in "certain risks"?
DA	hazard	84	(b) the organisation, on an ad hoc basis, of the collection of data and information in relation to the application of a specific set of the rules referred to in Article 1(2) or regarding the prevalence of certain hazards.	b) tilrettelæggelsen på ad hoc-basis af indsamlingen af data og oplysninger i forbindelse med anvendelsen af et bestemt af de regelsæt, der er omhandlet i artikel 1, stk. 2, eller vedrørende prævalensen af visse risici	Is "hazard" translated "risk" ("risici") in "certain risks"?
Language	Term	Location (doc page)	English	Translation	Observation	EFSA Focal Point
DA	risk	-	-	-	-	-
New version
Language	Term	Location (doc page)	English	Translation	Observation	EFSA Focal Point
DA	hazard	18	(d) an assessment of procedures on good manufacturing practices, good hygiene practices, good farming practices, and of procedures based on the principles of hazard analysis critical control points (HACCP);	d) vurdering af procedurer for god fremstillingspraksis, god hygiejnepraksis og godt landmandskab samt af procedurer baseret på HACCP-principperne (Hazard Analysis Critical Control Points)	Is "hazard analysis critical control points (HACCP);" translated as "HACCP-principperne" and English "(Hazard Analysis Critical Control Points)" Is the translation acceptable?
DA	hazard	94	With a view to conducting Union-wide targeted assessment of the state of application of the rules referred to in Article 1(2) or establishing the prevalence of certain hazards across the Union, the Commission may adopt implementing acts concerning:	Med henblik på at foretage en EU-dækkende målrettet vurdering af anvendelsen af de regler, der er omhandlet i artikel 1, stk. 2, eller bestemme prævalensen af visse risici i hele Unionen kan Kommissionen vedtage gennemførelsesretsakter vedrørende:	Was "hazard" translated "risk" ("risici") in "certain hazards"?
DA	hazard	94	(b) the organisation, on an ad hoc basis, of the collection of data and information in relation to the application of a specific set of the rules referred to in Article 1(2) or regarding the prevalence of certain hazards.	b) tilrettelæggelsen på ad hoc-basis af indsamlingen af data og oplysninger i forbindelse med anvendelsen af et bestemt af de regelsæt, der er omhandlet i artikel 1, stk. 2, eller vedrørende prævalensen af visse risici.	Was "hazard" translated "risk" ("risici") in "certain hazards"?
Language	Term	Location (doc page)	English	Translation	Observation	EFSA Focal Point
DA	risk	-	-	-	-	-

## Sheet: REG 1381-2019
Single version
Language	Term	Location (doc page)	English	Translation	Observation	EFSA Focal Point
DA	hazard	5	(28) It is therefore necessary to strengthen the transparency of the risk assessment in a proactive manner. All scientific data and information supporting requests for authorisations or for approvals under Union law as well as other requests for scientific output should be made publicly available in a proactive manner and be easily accessible as early as possible in the risk assessment process. H…	(28) Det er derfor nødvendigt at styrke åbenheden i risikovurderingen på en proaktiv måde. Alle videnskabelige data og oplysninger til støtte for anmodninger om tilladelse eller godkendelse i henhold til EU-retten samt andre anmodninger om videnskabelige resultater bør gøres offentligt tilgængelige på en proaktiv måde og være lettilgængelige så tidligt som muligt i risikovurderingsprocessen. En s…	Is the translation correct? Is "disclosed data and information" translated using the word for "hazard" ("fare")?
Language	Term	Location (doc page)	English	Translation	Observation	EFSA Focal Point
DA	risk	-	-	-	-	-
