# Supplementary material for: Food Risk Analysis: Towards a Better Understanding of „Hazard” and „Risk” in EU food legislation
Source: Preprints.org preprint supplement (doi:10.20944/preprints202306.1556.v1), 2023-06-21
Supplement: Supplementary file 6 [file DE.xlsx]

## Sheet: REG 178-2002
Old version
Language	Term	Location (doc page)	English	Translation	Observation	EU-FORA fellow reply
DE	hazard	-	-	-	-	-
Language	Term	Location (doc page)	English	Translation	Observation	EU-FORA fellow reply
DE	risk	5	(60) Recent food safety incidents have demonstrated the need to establish appropriate measures in emergency situations ensuring that all foods, whatever their type and origin, and all feed should be subject to common measures in the event of a serious risk to human health, animal health or the environment. Such a comprehensive approach to emergency food safety measures should allow effective acti…	(60) Vorkommnisse im Zusammenhang mit der Lebensmittelsicherheit in jüngerer Zeit haben gezeigt, dass es notwendig ist, geeignete Maßnahmen für Notfallsituationen festzulegen, wonach auf alle Lebensmittel unabhängig von ihrer Art und Herkunft und alle Futtermittel bei einer ernsthaften Gefährdung der Gesundheit von Mensch und Tier und der Umwelt einheitliche Verfahren angewandt werden können. Dur…	Is "risk" translated as "hazard" ("Gefährdung ") in "risk to human health" ? Is this acceptable?
	risk	12	3. A feed business operator shall immediately inform the competent authorities if it considers or has reason to believe that a feed which it placed on the market may not satisfy the feed safety requirements. It shall inform the competent authorities of the action taken to prevent risk arising from the use of that feed and shall not prevent or discourage any person from cooperating, in accordance …	(3) Erkennt ein Futtermittelunternehmer oder hat er Grund zu der Annahme, dass ein von ihm in Verkehr gebrachtes Futtermittel möglicherweise die Anforderungen an die Futtermittelsicherheit nicht erfüllt, teilt er dies unverzüglich den zuständigen Behörden mit. Der Unternehmer unterrichtet die zuständigen Behörden über die Maßnahmen, die getroffen worden sind, um eine Gefährdung durch die Verwendu…	Is "risk" translated as "hazard" ("Gefährdung ") in "eliminate a risk"? Is this acceptable?
New version
Language	Term	Location (doc page)	English	Translation	Observation	EU-FORA fellow reply
DE	hazard	14	3. A feed business operator shall immediately inform the competent authorities if it considers or has reason to believe that a feed which it placed on the market may not satisfy the feed safety requirements. It shall inform the competent authorities of the action taken to prevent risk arising from the use of that feed and shall not prevent or discourage any person from cooperating, in accordance …	(3) Erkennt ein Futtermittelunternehmer oder hat er Grund zu der Annahme, dass ein von ihm in Verkehr gebrachtes Futtermittel möglicherweise die Anforderungen an die Futtermittelsicherheit nicht erfüllt, teilt er dies unverzüglich den zuständigen Behörden mit. Der Unternehmer unterrichtet die zuständigen Behörden über die Maßnahmen, die getroffen worden sind, um eine Gefährdung durch die Verwendu…	Is "risk" translated as "hazard" ("Gefährdung ") in "eliminate a risk"? Is this acceptable?
DE	hazard	25	2. The Authority shall consult stakeholders and the public on the basis of the non-confidential version of the application or notification made public by the Authority in accordance with Articles 38 to 39e, and immediately after such disclosure to the public, in order to identify whether other relevant scientific data or studies are available on the subject matter concerned by the application or …	(2) Die Behörde konsultiert die Interessenträger und die Öffentlichkeit auf der Grundlage der nicht vertraulichen Fassung des Antrags oder der Anmeldung, die von der Behörde gemäß den Artikeln 38 bis 39e öffentlich gemacht wurde, unverzüglich nach dieser Offenlegung, um festzustellen, ob zu dem Gegenstand des Antrags oder der Anmeldung andere relevante wissenschaftliche Daten oder Studien verfügb…	Is "risk" translated as "hazard" ("Gefahr") in "there is a risk that"? Is this acceptable?
Language	Term	Location (doc page)	English	Translation	Observation	EU-FORA fellow reply
DE	risk	-	-	-	-	-

## Sheet: REG 852-2004
Old version
Language	Term	Location (doc page)	English	Translation	Observation	EU-FORA fellow reply
DE	hazard	45	(f) adequate arrangements and/or facilities for the hygienic storage and disposal of hazardous and/or inedible substances and waste (whether liquid or solid) are to be available;	f) es müssen angemessene Vorrichtungen und/oder Einrichtungen zur hygienischen Lagerung und Entsorgung von gesundheitlich bedenklichen und/ oder ungenießbaren (flüssigen und festen) Stoffen und Abfällen vorhanden sein;	Is "hazardous" translated as "questionable" ("gesundheitlich bedenklichen und/oder ungenießbaren flüssigen und festen) Stoffen") in "hazardous and/or inedible substances"? Is the translation acceptable? Should it be translated as "gefährliche stoffe" or in another way? Is this acceptable?
DE	hazard	46	2. Receptacles in vehicles and/or containers are not to be used for transporting anything other than foodstuffs where this may result in contamination.	2. Transportbehälter und/oder Container müssen ausschließlich der Beförderung von Lebensmitteln vorbehalten bleiben, wenn die Gefahr von Kontamination besteht.	Is "may result in contamination" translated as "in danger of contamination" ("die Gefahr von Kontamination")? Is the translation acceptable? Should it be translated in another way? Is this acceptable?
Language	Term	Location (doc page)	English	Translation	Observation	EU-FORA fellow reply
DE	risk	46	2. Receptacles in vehicles and/or containers are not to be used for transporting anything other than foodstuffs where this may result in contamination.	2. Transportbehälter und/oder Container müssen ausschließlich der Beförderung von Lebensmitteln vorbehalten bleiben, wenn die Gefahr von Kontamination besteht.	Is "may result in contamination" translated as "hazard of contamination" ("Gefahr von Kontamination")?Is the translation acceptable? Should it be translated "Kontaminationsrisikon" or in another way? Is this acceptable?
DE	risk	51	5. Raw materials, ingredients, intermediate products and finished products likely to support the reproduction of pathogenic micro-organisms or the formation of toxins are not to be kept at temperatures that might result in a risk to health. The cold chain is not to be interrupted. However, limited periods outside temperature control are permitted, to accommodate the practicalities of handling dur…	5. Rohstoffe, Zutaten, Zwischenerzeugnisse und Enderzeugnisse, die die Vermehrung pathogener Mikroorganismen oder die Bildung von Toxinen fördern können, dürfen nicht bei Temperaturen aufbewahrt werden, die einer Gesundheitsgefährdung Vorschub leisten könnten. Die Kühlkette darf nicht unterbrochen werden. Es darf jedoch für begrenzte Zeit von den Temperaturvorgaben abgewichen werden, sofern dies …	Is "risk" translated as "hazard" ("Gesundheitsgefährdung") in "risk to health"? Is this acceptable?
DE	risk	52	2. Wrapping materials are to be stored in such a manner that they are not exposed to a risk of contamination	2. Umhüllungen müssen so gelagert werden, dass sie nicht kontaminiert werden können.	Is the word "risk" missing from the German version? Is this acceptable?
New version
Language	Term	Location (doc page)	English	Translation	Observation	EU-FORA fellow reply
DE	hazard	19	(f) adequate arrangements and/or facilities for the hygienic storage and disposal of hazardous and/or inedible substances and waste (whether liquid or solid) are to be available;	f) es müssen angemessene Vorrichtungen und/oder Einrichtungen zur hygienischen Lagerung und Entsorgung von gesundheitlich bedenklichen und/ oder ungenießbaren (flüssigen und festen) Stoffen und Abfällen vorhanden sein;	Is "hazardous and/or inedible substances" translated as "questionable substances" ("gesundheitlich bedenklichen und/oder ungenießbaren flüssigen und festen) Stoffen")? Is this acceptable? Should it be translated as "gefährliche stoffe" or in another way? Is this acceptable?
DE	hazard	19	2. Receptacles in vehicles and/or containers are not to be used for transporting anything other than foodstuffs where this may result in contamination.	2. Transportbehälter und/oder Container müssen ausschließlich der Beförderung von Lebensmitteln vorbehalten bleiben, wenn die Gefahr von Kontamination besteht.	Is "may result in contamination" translated as "in danger of contamination" ("die Gefahr von Kontamination")? Is this acceptable? Should it be translated as "gefährliche stoffe" or in another way?
Language	Term	Location (doc page)	English	Translation	Observation	EU-FORA fellow reply
DE	risk	22	When clean water is used, adequate facilities and procedures are to be available for its supply to ensure that such use is not a source of contamination for the foodstuff.	Wird sauberes Wasser verwendet, so müssen für die Versorgung hiermit angemessene Einrichtungen und Verfahren zur Verfügung stehen, um zu gewährleisten, dass eine solche Verwendung kein Kontaminationsrisiko für die Lebensmittel darstellt.	Is "source" translated as "risk" ("Kontaminationsrisiko") in "source of contamination"? Is this acceptable?
DE	risk	23	5. Raw materials, ingredients, intermediate products and finished products likely to support the reproduction of pathogenic micro-organisms or the formation of toxins are not to be kept at temperatures that might result in a risk to health. The cold chain is not to be interrupted. However, limited periods outside temperature control are permitted, to accommodate the practicalities of handling dur…	5. Rohstoffe, Zutaten, Zwischenerzeugnisse und Enderzeugnisse, die die Vermehrung pathogener Mikroorganismen oder die Bildung von Toxinen fördern können, dürfen nicht bei Temperaturen aufbewahrt werden, die einer Gesundheitsgefährdung Vorschub leisten könnten. Die Kühlkette darf nicht unterbrochen werden. Es darf jedoch für begrenzte Zeit von den Temperaturvorgaben abgewichen werden, sofern dies …	Is "risk" translated as "hazard" ("Gesundheitsgefährdung") in "risk to health"? Is this acceptable?
DE	risk	24	2. Wrapping materials are to be stored in such a manner that they are not exposed to a risk of contamination	2. Umhüllungen müssen so gelagert werden, dass sie nicht kontaminiert werden können.	Is the word "risk" missing from the German version? Is this acceptable? Is this acceptable?

## Sheet: REG 853-2004
Old version
Language	Term	Location (doc page)	English	Translation	Observation	EU-FORA fellow reply
DE	hazard	-	-	-	-	-
Language	Term	Location (doc page)	English	Translation	Observation	EU-FORA fellow reply
DE	risk	76	2. The trained person must carry out an examination of the body, and of any viscera removed, to identify any characteristics that may indicate that the meat presents a health risk. The examination must take place as soon as possible after killing	2. Die kundige Person muss den Wildkörper und alle ausgenommenen Eingeweide auf Merkmale hin untersuchen, die darauf schließen lassen, dass das Fleisch gesundheitlich bedenklich sein könnte. Die Untersuchung muss so bald wie möglich nach dem Erlegen stattfinden.	Is "risk" translated as "questionable" ("bedenklich") in "risk to health"? Is this acceptable?
DE	risk	78	1. The trained person must carry out an examination to identify any characteristics that may indicate that the meat presents a health risk. The examination must take place as soon as possible after killing.	1. Die kundige Person muss den Wildkörper auf Merkmale hin untersuchen, die darauf schließen lassen, dass das Fleisch gesundheitlich bedenklich sein könnte. Die Untersuchung muss so bald wie möglich nach dem Erlegen stattfinden.	Is "risk" translated as "questionable" ("bedenklich") in "risk to health"? Is this acceptable?
DE	risk	117	(b) is stored in such a manner that it is not exposed to a risk of contamination;	b) so gelagert wird, dass es nicht kontaminiert werden kann	Is the word "risk" missing in the German version? Is the translation acceptable? Is this acceptable?
New version
Language	Term	Location (doc page)	English	Translation	Observation	EU-FORA fellow reply
DE	hazard	-	-	-	-	-
Language	Term	Location (doc page)	English	Translation	Observation	EU-FORA fellow reply
DE	risk	44	1. The trained person must carry out an examination to identify any characteristics that may indicate that the meat presents a health risk. The examination must take place as soon as possible after killing.	1. Die kundige Person muss den Wildkörper auf Merkmale hin untersuchen, die darauf schließen lassen, dass das Fleisch gesundheitlich bedenklich sein könnte. Die Untersuchung muss so bald wie möglich nach dem Erlegen stattfinden.	Is "risk" translated as "questionable" ("bedenklich") in "risk to health"? Is this acceptable?
DE	risk	68	(b) is stored in such a manner that it is not exposed to a risk of contamination;	b) so gelagert wird, dass es nicht kontaminiert werden kann	Is the word "risk" missing in the German version? Is the translation acceptable? Is this acceptable?
DE	risk	82	(a) all ruminant bone material derived from animals born, reared or slaughtered in countries or regions with a controlled or undetermined BSE risk in accordance with Community legislation is subjected to a process which ensures that all bone material is finely crushed and degreased with hot water and treated with dilute hydrochloric acid (at minimum concentration of 4 % and pH < 1,5) over a perio…	a) Knochenmaterial von Wiederkäuern, die in Ländern oder Regionen geboren, aufgezogen oder geschlachtet wurden, die nach dem geltenden Gemeinschaftsrecht eine kontrollierte oder unbestimmte BSE-Inzidenz aufweisen, ist einem Verarbeitungsprozess zu unterziehen, bei dem das gesamte Knochenmaterial fein vermahlen, mit heißem Wasser entfettet und mindestens 2 Tage lang mit verdünnter Salzsäure (minde…	Is the word "risk" missing in the German version? Is the translation acceptable? Is this acceptable?
DE	risk	87	must ensure that the treatment of the raw materials used eliminates any animal or public health risk.	müssen sicherstellen, dass durch die Behandlung der verwendeten Rohstoffe jegliche Gefahr für die Gesundheit von Mensch oder Tier ausgeschlossen wird.	Is "risk" translated as "hazard" ("Gefahr) in "health risk"? Is this acceptable?

## Sheet: REG 625-2017
Old version
Language	Term	Location (doc page)	English	Translation	Observation	EU-FORA fellow reply
DE	hazard	2	(6) Transmissible animal diseases, including by micro-organisms that have developed resistance to antimicrobials, may have a significant impact on public health, food and feed safety, and animal health and welfare. In order to ensure high standards of animal and public health in the Union, rules on animal health measures and on feed and food safety are laid down at Union level. Compliance with th…	(6) Übertragbare Tierseuchen, einschließlich durch Mikroorganismen, die eine Antibiotikaresistenz entwickelt haben, können beträchtliche Auswirkungen auf die öffentliche Gesundheit, die Lebens- und Futtermittelsicherheit sowie die Tiergesundheit und den Tierschutz haben. Um ein hohes Gesundheitsniveau bei Mensch und Tier in der Union sicherzustellen, wurden auf Unionsebene Vorschriften für Tierge…	Is "threat" translated as "hazard" ("Gefahr") in "against the rising threats from Antimicrobial Resistance"?
DE	hazard	60	(i) arrangements to comply with relevant biosecurity standards in order to prevent the spread of diseases into the Union.	Regelungen, um die einschlägigen Normen für den Schutz vor biologischen Gefahren (biosecurity standards) zu erfüllen und so die Einschleppung von Krankheiten in die Union zu verhindern.	Is the translation correct? Is this part an addition "Standards for protection against biological hazards" ("Normen zum Schutz vor biologischen Gefahren")?
DE	hazard	79	(f) where relevant, be equipped to comply with relevant biosecurity standards.	f) sind gegebenenfalls so ausgestattet, dass sie die einschlägigen Normen zum Schutz vor biologischen Gefahren (biosecurity standards) erfüllen.	Is this part an addition in the German version "Standards for protection against biological hazards" ("Normen zum Schutz vor biologischen Gefahren")? Is the translation acceptable?
Language	Term	Location (doc page)	English	Translation	Observation	EU-FORA fellow reply
DE	risk	67	(g) plant products which, on account of their subsequent destination, may give rise to the risk of spreading infectious or contagious animal diseases;	Pflanzenerzeugnisse, die aufgrund ihrer anschließenden Bestimmung infektiöse oder ansteckende Tierkrankheiten verbreiten können;	Is the word "risk" is missing from the German version? Is the translation acceptable?
DE	risk	72	(b) the mechanisms and technical arrangements to ensure the issuance of accurate and reliable official certificates, and prevent risk of fraud;	b) die Verfahren und die technischen Regelungen, um die Ausstellung präziser und verlässlicher amtlicher Bescheinigungen zu gewährleisten und Betrug zu vermeiden;	Is the word "risk" is missing from the German version? Is the translation acceptable?
New version
Language	Term	Location (doc page)	English	Trans;ation	Observation	EU-FORA fellow reply
DE	hazard	60	(i) arrangements to comply with relevant biosecurity standards in order to prevent the spread of diseases into the Union.	Regelungen, um die einschlägigen Normen für den Schutz vor biologischen Gefahren (biosecurity standards) zu erfüllen und so die Einschleppung von Krankheiten in die Union zu verhindern.	Is this part an addition in the German version "Standards for protection against biological hazards" ("Normen zum Schutz vor biologischen Gefahren")? Is the translation acceptable?
DE	hazard	79	(f) where relevant, be equipped to comply with relevant biosecurity standards.	f) sind gegebenenfalls so ausgestattet, dass sie die einschlägigen Normen zum Schutz vor biologischen Gefahren (biosecurity standards) erfüllen.	Is this part an addition in the German version "Standards for protection against biological hazards" ("Normen zum Schutz vor biologischen Gefahren")? Is the translation acceptable?
Language	Term	Location (doc page)	English		Observation	EU-FORA fellow reply
DE	risk	44	1. The trained person must carry out an examination to identify any characteristics that may indicate that the meat presents a health risk. The examination must take place as soon as possible after killing.	1. Die kundige Person muss den Wildkörper auf Merkmale hin untersuchen, die darauf schließen lassen, dass das Fleisch gesundheitlich bedenklich sein könnte. Die Untersuchung muss so bald wie möglich nach dem Erlegen stattfinden.	Is "risk" translated as "questionable" ("bedenklich") in "risk to health"? Is this acceptable?
DE	risk	68	(b) is stored in such a manner that it is not exposed to a risk of contamination;	b) so gelagert wird, dass es nicht kontaminiert werden kann	Is the word "risk" is missing from the German version? Is the translation acceptable?
DE	risk	70	(g) plant products which, on account of their subsequent destination, may give rise to the risk of spreading infectious or contagious animal diseases;	Pflanzenerzeugnisse, die aufgrund ihrer anschließenden Bestimmung infektiöse oder ansteckende Tierkrankheiten verbreiten können;	Is the word "risk" is missing from the German version? Is the translation acceptable?
DE	risk	77	(b) the mechanisms and technical arrangements to ensure the issuance of accurate and reliable official certificates, and prevent risk of fraud;	b) die Verfahren und die technischen Regelungen, um die Ausstellung präziser und verlässlicher amtlicher Bescheinigungen zu gewährleisten und Betrug zu vermeiden;	Is the word "risk" is missing from the German version? Is the translation acceptable?

## Sheet: REG 1381-2019
Single version
Language	Term	Location (doc page)	English	Translation	Observation	EU-FORA fellow reply
DE	hazard	-	-	-	-	-
Language	Term	Location (doc page)	English	Translation	Observation	EU-FORA fellow reply
DE	risk	4	(24) There are certain public concerns about the Authority's assessment in the area of authorisation procedures being primarily based on industry studies. It is of utmost importance that the Authority carry out searches in scientific literature to be able to consider other data and studies existing on the subject matter submitted to its assessment. In order to provide an additional level of guara…	(24) In der Öffentlichkeit gibt es gewisse Bedenken, dass sich von der Behörde im Hinblick auf Zulassungsverfahren durchgeführte Bewertungen in erster Linie auf Studien der Industrie stützen. Es ist von größter Bedeutung, dass die Behörde Recherchen in der wissenschaftlichen Literatur durchführt, um andere Daten und Studien zu dem zu bewertenden Gegenstand prüfen zu können. Als zusätzliche Gewähr…	Is "risk" translated as "hazard" in "Where there is a risk that the results of a public consultation cannot be given proper consideration because of the applicable deadlines, it is appropriate to provide for a limited extension of those deadlines. "? Is this acceptable?
DE	risk	12	2. The Authority shall consult stakeholders and the public on the basis of the non-confidential version of the application or notification made public by the Authority in accordance with Articles 38 to 39e, and immediately after such disclosure to the public, in order to identify whether other relevant scientific data or studies are available on the subject matter concerned by the application or …	(2) Die Behörde konsultiert die Interessenträger und die Öffentlichkeit auf der Grundlage der nicht vertraulichen Fassung des Antrags oder der Anmeldung, die von der Behörde gemäß den Artikeln 38 bis 39e öffentlich gemacht wurde, unverzüglich nach dieser Offenlegung, um festzustellen, ob zu dem Gegenstand des Antrags oder der Anmeldung andere relevante wissenschaftliche Daten oder Studien verfügb…	Is "risk" translated as "hazard" in "In duly justified cases, where there is a risk that the results of the public consultation performed in accordance with this paragraph cannot be given proper consideration because of the applicable time limits within which the Authority is required to deliver its scientific output, those time limits may be extended for a maximum period of seven weeks."? Is thi…
