# Supplementary material for: Food Risk Analysis: Towards a Better Understanding of „Hazard” and „Risk” in EU food legislation
Source: Preprints.org preprint supplement (doi:10.20944/preprints202306.1556.v1), 2023-06-21
Supplement: Supplementary file 7 [file EL.xlsx]

## Sheet: REG 178-2002
Old version
Language	Term	Location (doc page)	English	Translation	Observation	EU-FORA fellow reply
EL	hazard	8	14. ‘hazard’ means a biological, chemical or physical agent in, or condition of, food or feed with the potential to cause an adverse health effect;	14. «πηγή κινδύνου»: ένας βιολογικός, χηµικός ή φυσικός παράγοντας στα τρόφιµα ή τις ζωοτροφές ή µια κατάσταση των τροφίµων, που έχει τη δυνατότητα να προκαλέσει αρνητικές συνέπειες στην υγεία,	Is "hazard" translated as "source of risk" ("πηγής κινδύνου")? Is the translation acceptable?
EL	hazard	15	(f) the Panel on biological hazards;	στ) η οµάδα µε θέµα τις βιολογικές πηγές κινδύνου	Is "hazard" translated as "source of risk" ("πηγής κινδύνου")? Is the translation acceptable?
Language	Term	Location (doc page)	English	Translation	Observation	EU-FORA fellow reply
EL	risk	13	(h) to provide scientific and technical assistance, when requested to do so by the Commission, in the crisis management procedures implemented by the Commission with regard to the safety of food and feed;	η) παρέχει επιστηµονική και τεχνική βοήθεια στην Επιτροπή όταν αυτή το ζητά, κατά τις διαδικασίες διαχείρισης του κινδύνου που διεξάγει η Επιτροπή όσον αφορά την ασφάλεια των τροφίµων και των ζωοτροφών,	Is "crisis" translated as "risk" ("κινδύνου") in "crisis management" ("διαχείρισης του κινδύνου")? Is the translation acceptable?
New version
Language	Term	Location (doc page)	English	Translation	Observation	EU-FORA fellow reply
EL	hazard	4	14. ‘hazard’ means a biological, chemical or physical agent in, or condition of, food or feed with the potential to cause an adverse health effect;	14. «πηγή κινδύνου»: ένας βιολογικός, χημικός ή φυσικός παράγοντας στα τρόφιμα ή τις ζωοτροφές ή μια κατάσταση των τροφίμων, που έχει τη δυνατότητα να προκαλέσει αρνητικές συνέπειες στην υγεία,	Is "hazard" translated as "source of risk/danger" ("πηγής του κινδύνου"? Is the translation acceptable?
EL	hazard	20	(f) the Panel on biological hazards;	στ) η οµάδα µε θέµα τις βιολογικές πηγές κινδύνου	Is "hazard" translated as "source of risk" ("πηγής κινδύνου")? Is the translation acceptable?
Language	Term	Location (doc page)	English	Translation	Observation	EU-FORA fellow reply
EL	risk	16	(h) to provide scientific and technical assistance, when requested to do so by the Commission, in the crisis management procedures implemented by the Commission with regard to the safety of food and feed;	η) παρέχει επιστηµονική και τεχνική βοήθεια στην Επιτροπή όταν αυτή το ζητά, κατά τις διαδικασίες διαχείρισης του κινδύνου που διεξάγει η Επιτροπή όσον αφορά την ασφάλεια των τροφίµων και των ζωοτροφών,	Is "crisis" translated as "risk" ("κινδύνου") in "crisis management" ("διαχείρισης του κινδύνου")?Is the translation acceptable?

## Sheet: REG 852-2004
Old version
Language	Term	Location (doc page)	English	Translation	Observation	EU-FORA fellow reply
EL	hazard	4	(10) Food hazards present at the level of primary production should be identified and adequately controlled to ensure the achievement of the objectives of this Regulation. However, in the case of the direct supply of small quantities of primary products, by the food business operator producing them, to the final consumer or to a local retail establishment, it is appropriate to protect public heal…	(10) Οι πηγές κινδύνου στα τρόφιµα οι οποίες ενυπάρχουν στο επίπεδο της πρωτογενούς παραγωγής θα πρέπει να εντοπίζονται και να ελέγχονται καταλλήλως για να εξασφαλίζεται η επίτευξη των στόχων του παρόντος κανονισµού. Ωστόσο, στην περίπτωση άµεσης προµήθειας µικρών ποσοτήτων πρωτογενών προϊόντων, από τον υπεύθυνο επιχείρησης τροφίµων που τα παράγει, στον τελικό καταναλωτή ή σε τοπικά καταστήµατα λ…	Is "hazard" translated as "source of danger/hazard" ("πηγές κινδύνου") in "food hazards"?
EL	hazard	4	(11) The application of hazard analysis and critical control point (HACCP) principles to primary production is not yet generally feasible. However, guides to good practice should encourage the use of appropriate hygiene practices at farm level. Where necessary, specific hygiene rules for primary production should supplement these guides. It is appropriate for the hygiene requirements applicable t…	(11) ∆εν είναι ακόµη γενικώς εφικτή η εφαρµογή των αρχών της ανάλυσης κινδύνων και κρίσιµων σηµείων ελέγχου (HACCP) στην πρωτογενή παραγωγή. Ωστόσο, οι οδηγοί ορθής πρακτικής θα πρέπει να ενθαρρύνουν τη χρήση κατάλληλων πρακτικών υγιεινής σε επίπεδο αγροκτήµατος. Κατά περίπτωση, οι οδηγοί αυτοί θα πρέπει να συµπληρώνονται µε ειδικούς κανόνες υγιεινής για την πρωτογενή παραγωγή. Είναι σκόπιµο να δ…	Is "hazard analysis" translated as "risk analysis" ("ανάλυσης κινδύνου") in "hazard analysis"?
EL	hazard	10	(a) ‘food hygiene’, hereinafter called ‘hygiene’, means the measures and conditions necessary to control hazards and to ensure fitness for human consumption of a foodstuff taking into account its intended use;	α) «υγιεινή των τροφίμων», εφεξής καλούμενη «υγιεινή»: τα μέτρα και οι όροι που είναι αναγκαία για τον έλεγχο των πηγών κινδύνου και για την εξασφάλιση της καταλληλότητας των τροφίμων για ανθρώπινη κατανάλωση, λαμβανομένης υπόψη της σκοπούμενης χρήσης τους·	Is "hazard" translated as "source of danger/hazard" ("πηγές κινδύνου") in "food hazards"?
EL	hazard	11	(f) ‘contamination’ means the presence or introduction of a hazard;	στ) «μόλυνση»: η παρουσία ή η εισαγωγή πηγών κινδύνου·	Is "hazard" translated as "source of danger/hazard" ("πηγές κινδύνου") in "food hazards"?
EL	hazard	11	(l) ‘hermetically sealed container’ means a container that is designed and intended to be secure against the entry of hazards;	ιβ) «ερμητικά σφραγισμένο δοχείο»: το δοχείο που είναι σχεδιασμένο και προορίζεται να παρέχει ασφάλεια κατά της εισόδου πηγών κινδύνου·	Is "hazard" translated as "source of danger/hazard" ("πηγές κινδύνου") in "food hazards"?
EL	hazard	15	Hazard analysis and critical control points	Ανάλυση κινδύνων και κρίσιμα σημεία ελέγχου	Is "hazard analysis" translated as "risk analysis" ("ανάλυσης κινδύνου") n "hazard analysis"?
EL	hazard	15	(a) identifying any hazards that must be prevented, eliminated or reduced to acceptable levels;	α) να εντοπίζονται οι τυχόν πηγές κινδύνου οι οποίες πρέπει να προληφθούν, να εξαλειφθούν ή να μειωθούν σε αποδεκτά επίπεδα·	Is "hazard" translated as "source of danger/hazard" ("πηγές κινδύνου") in "food hazards"?
EL	hazard	15	(b) identifying the critical control points at the step or steps at which control is essential to prevent or eliminate a hazard or to reduce it to acceptable levels;	β) να εντοπίζονται τα κρίσιμα σημεία ελέγχου στο ή στα στάδια στα οποία ο έλεγχος είναι ουσιαστικής σημασίας για την πρόληψη ή την εξάλειψη μιας πηγής κινδύνου ή τη μείωσή της σε αποδεκτά επίπεδα·	Is "hazard" translated as "source of danger/hazard" ("πηγές κινδύνου") in "food hazards"?
EL	hazard	16	(c) establishing critical limits at critical control points which separate acceptability from unacceptability for the prevention, elimination or reduction of identified hazards;	γ) να καθορίζονται κρίσιμα όρια στα κρίσιμα σημεία ελέγχου, με τα οποία χωρίζεται το αποδεκτό από το μη αποδεκτό όσον αφορά την πρόληψη, την εξάλειψη ή τη μείωση των εντοπιζόμενων πηγών κινδύνου·	Is "hazard" translated as "source of danger/hazard" ("πηγές κινδύνου") in "food hazards"?
EL	hazard	26	(c) explain the reasons for the adaptation, including, where relevant, by providing a summary of the hazard analysis carried out and any measures to be taken to ensure that the adaptation will not compromise the objectives of this Regulation;	γ) εξηγεί τους λόγους της προσαρμογής επισυνάπτοντας, ενδεχομένως, περίληψη της ανάλυσης κινδύνου που έχει διενεργηθεί και των τυχόν μέτρων που πρέπει να ληφθούν ώστε να εξασφαλισθεί ότι η προσαρμογή δεν θέτει σε κίνδυνο τους στόχους του παρόντος κανονισμού	Is "hazard" translated as "source of danger/hazard" ("πηγές κινδύνου") in "food hazards"?
EL	hazard	32	3. Notwithstanding the general duty laid down in paragraph 2, food business operators are to comply with appropriate Community and national legislative provisions relating to the control of hazards in primary production and associated operations, including:	3. Παρά τη γενική υποχρέωση που προβλέπεται στο σημείο 2, οι υπεύθυνοι επιχειρήσεων τροφίμων πρέπει να τηρούν τις κατάλληλες κοινοτικές και εθνικές νομοθετικές διατάξεις που αφορούν τον έλεγχο των πηγών κινδύνου στην πρωτογενή παραγωγή και τις συναφείς εργασίες, συμπεριλαμβανομένων:	Is "hazard" translated as "source of danger/hazard" ("πηγές κινδύνου") in "food hazards"?
EL	hazard	33	(g) to store and handle waste and hazardous substances so as to prevent contamination;	ζ) η αποθήκευση και ο χειρισμός των αποβλήτων και των επικίνδυνων ουσιών να γίνονται έτσι ώστε να προλαμβάνεται η μόλυνση	Is "hazardous substances translated as "risky substances" ("επικίνδυνων ουσιών") in "hazardous substances"?
EL	hazard	34	(f) to store and handle wastes and hazardous substances so as to prevent contamination;	στ) η αποθήκευση και ο χειρισμός των αποβλήτων και των επικίνδυνων ουσιών να γίνεται έτσι ώστε να προλαμβάνεται η μόλυνση και	Is "hazardous substances translated as "risky substances" ("επικίνδυνων ουσιών") in "hazardous substances"?
EL	hazard	35	7. Food business operators are to keep and retain records relating to measures put in place to control hazards in an appropriate manner and for an appropriate period, commensurate with the nature and size of the food business. Food business operators are to make relevant information contained in these records available to the competent authority and receiving food business operators on request.	7. Οι υπεύθυνοι επιχειρήσεων τροφίμων καταρτίζουν καταλλήλως και τηρούν επί κατάλληλο χρονικό διάστημα, ανάλογο με τη φύση και το μέγεθος της επιχείρησης τροφίμων, αρχεία σχετικά με τα μέτρα που λαμβάνονται για τον έλεγχο των πηγών κινδύνου. Οι υπεύθυνοι θέτουν στη διάθεση των αρμόδιων αρχών και των υπευθύνων επιχειρήσεων τροφίμων που παραλαμβάνουν τα προϊόντα τους, τα στοιχεία που περιλαμβάνοντα…	Is "hazard" translated as "source of danger/hazard" ("πηγές κινδύνου") in "food hazards"?
EL	hazard	37	1. National and Community guides referred to in Articles 7 to 9 of this Regulation should contain guidance on good hygiene practice for the control of hazards in primary production and associated operations.	1. Οι εθνικοί και οι κοινοτικοί οδηγοί που αναφέρονται στα άρθρα 7 έως 9 του παρόντος κανονισμού θα πρέπει να περιλαμβάνουν οδηγίες σχετικά με την ορθή πρακτική υγιεινής για τον έλεγχο των πηγών κινδύνου κατά την πρωτογενή παραγωγή και τις συναφείς εργασίες.	Is "hazard" translated as "source of danger/hazard" ("πηγές κινδύνου") in "food hazards"?
EL	hazard	37	2. Guides to good hygiene practice should include appropriate information on hazards that may arise in primary production and associated operations and actions to control hazards, including relevant measures set out in Community and national legislation or national and Community programmes. Examples of such hazards and measures may include:	2. Οι οδηγοί ορθής υγιεινής πρακτικής θα πρέπει να περιλαμβάνουν τις δέουσες πληροφορίες σχετικά με τις πηγές κινδύνου που είναι δυνατόν να προκύψουν κατά την πρωτογενή παραγωγή και τις συναφείς εργασίες και τις δράσεις για τον έλεγχο των πηγών κινδύνου, καθώς και τα δέοντα μέτρα που προβλέπονται από την κοινοτική και την εθνική νομοθεσία ή από τα εθνικά και κοινοτικά προγράμματα. Στους κινδύνους…	Is "hazard" translated as "source of danger/hazard" ("πηγές κινδύνου") in "food hazards"?
EL	hazard	45	(f) adequate arrangements and/or facilities for the hygienic storage and disposal of hazardous and/or inedible substances and waste (whether liquid or solid) are to be available;	στ) πρέπει να υπάρχουν κατάλληλες διατάξεις ή/και εγκαταστάσεις για την υγιεινή αποθήκευση και διάθεση των επικίνδυνων ή/και μη βρώσιμων στερεών ή υγρών ουσιών και αποβλήτων·	Is "hazardous and/or inedible substances" translated as "questionable substances" ("επικίνδυνων ουσιών") in "hazardous and/or inedible substances"?
EL	hazard	49	5. Steam used directly in contact with food is not to contain any substance that presents a hazard to health or is likely to contaminate the food	5. Ο ατμός που χρησιμοποιείται σε άμεση επαφή με τρόφιμα πρέπει να είναι απαλλαγμένος από κάθε ουσία που παρουσιάζει κίνδυνο για την υγεία ή ενδέχεται να μολύνει τα τρόφιμα.	Is "hazards" translated as "danger" (κίνδυνο) in "hazard to health"?
EL	hazard	52	8. Hazardous and/or inedible substances, including animal feed, are to be adequately labelled and stored in separate and secure containers.	8. Οι επικίνδυνες ή/και μη εδώδιμες ουσίες, συμπεριλαμβανομένων των ζωοτροφών, πρέπει να φέρουν την κατάλληλη επισήμανση και να αποθηκεύονται σε χωριστά και ασφαλή δοχεία.	Is "hazardous" translated as "risky" ("επικίνδυνες") in "hazardous and/or inedible substances"?
Language	Term	Location (doc page)	English	Translation	Observation	EU-FORA fellow reply
EL	risk	50	2. No person suffering from, or being a carrier of a disease likely to be transmitted through food or afflicted, for example, with infected wounds, skin infections, sores or diarrhoea is to be permitted to handle food or enter any food-handling area in any capacity if there is any likelihood of direct or indirect contamination. Any person so affected and employed in a food business and who is lik…	2. Απαγορεύεται ο χειρισμός των τροφίμων και η με οποιαδήποτε ιδιότητα είσοδος σε χώρους εργασίας με τρόφιμα οποιουδήποτε προσώπου πάσχει από νόσημα ή είναι φορέας νοσήματος που μεταδίδεται διά των τροφών ή προσώπου με μολυσμένα τραύματα ή πάσχει από δερματική μόλυνση, έλκη ή διάρροια, εάν υφίσταται κίνδυνος άμεσης ή έμμεσης μόλυνσης. Κάθε πρόσωπο απασχολούμενο σε επιχείρηση τροφίμων το οποίο έχε…	Is "likelihood of direct and indirect contamination" translated as "immediate danger" ("κίνδυνος άμεσης")? Is it appropriate? Should it be translated "πιθανότητα άμεσης και έμμεσης μόλυνση"?
New version
Language	Term	Location (doc page)	English	Translation	Observation	EU-FORA fellow reply
EL	hazard	3	(a) ‘food hygiene’, hereinafter called ‘hygiene’, means the measures and conditions necessary to control hazards and to ensure fitness for human consumption of a foodstuff taking into account its intended use;	α) «υγιεινή των τροφίμων», εφεξής καλούμενη «υγιεινή»: τα μέτρα και οι όροι που είναι αναγκαία για τον έλεγχο των πηγών κινδύνου και για την εξασφάλιση της καταλληλότητας των τροφίμων για ανθρώπινη κατανάλωση, λαμβανομένης υπόψη της σκοπούμενης χρήσης τους·	Is "hazard" translated as "source of danger/hazard" ("πηγές κινδύνου") in "food hazards"?
EL	hazard	3	(f) ‘contamination’ means the presence or introduction of a hazard;	στ) «μόλυνση»: η παρουσία ή η εισαγωγή πηγών κινδύνου·	Is "hazard" translated as "source of danger/hazard" ("πηγές κινδύνου") in "food hazards"?
EL	hazard	3	(l) ‘hermetically sealed container’ means a container that is designed and intended to be secure against the entry of hazards;	ιβ) «ερμητικά σφραγισμένο δοχείο»: το δοχείο που είναι σχεδιασμένο και προορίζεται να παρέχει ασφάλεια κατά της εισόδου πηγών κινδύνου·	Is "hazard" translated as "risk" ("ανάλυσης κινδύνου") in "entry of hazards"?
EL	hazard	5	Hazard analysis and critical control points	Ανάλυση κινδύνων και κρίσιμα σημεία ελέγχου	Is "hazard" translated as "source of danger/hazard" ("πηγές κινδύνου") in "food hazards"?
EL	hazard	5	(a) identifying any hazards that must be prevented, eliminated or reduced to acceptable levels;	α) να εντοπίζονται οι τυχόν πηγές κινδύνου οι οποίες πρέπει να προληφθούν, να εξαλειφθούν ή να μειωθούν σε αποδεκτά επίπεδα·	Is "hazard" translated as "source of danger/hazard" ("πηγές κινδύνου") in "food hazards"?
EL	hazard	5	(b) identifying the critical control points at the step or steps at which control is essential to prevent or eliminate a hazard or to reduce it to acceptable levels;	β) να εντοπίζονται τα κρίσιμα σημεία ελέγχου στο ή στα στάδια στα οποία ο έλεγχος είναι ουσιαστικής σημασίας για την πρόληψη ή την εξάλειψη μιας πηγής κινδύνου ή τη μείωσή της σε αποδεκτά επίπεδα·	Is "hazard" translated as "source of danger/hazard" ("πηγές κινδύνου") in "food hazards"?
EL	hazard	5	(c) establishing critical limits at critical control points which separate acceptability from unacceptability for the prevention, elimination or reduction of identified hazards;	γ) να καθορίζονται κρίσιμα όρια στα κρίσιμα σημεία ελέγχου, με τα οποία χωρίζεται το αποδεκτό από το μη αποδεκτό όσον αφορά την πρόληψη, την εξάλειψη ή τη μείωση των εντοπιζόμενων πηγών κινδύνου·	Is "hazard" translated as "source of danger/hazard" ("πηγές κινδύνου") in "food hazards"?
EL	hazard	11	(c) explain the reasons for the adaptation, including, where relevant, by providing a summary of the hazard analysis carried out and any measures to be taken to ensure that the adaptation will not compromise the objectives of this Regulation;	γ) εξηγεί τους λόγους της προσαρμογής επισυνάπτοντας, ενδεχομένως, περίληψη της ανάλυσης κινδύνου που έχει διενεργηθεί και των τυχόν μέτρων που πρέπει να ληφθούν ώστε να εξασφαλισθεί ότι η προσαρμογή δεν θέτει σε κίνδυνο τους στόχους του παρόντος κανονισμού	Is "hazard" translated as "source of danger/hazard" ("πηγές κινδύνου") in "food hazards"?
EL	hazard	14	3. Notwithstanding the general duty laid down in paragraph 2, food business operators are to comply with appropriate Community and national legislative provisions relating to the control of hazards in primary production and associated operations, including:	3. Παρά τη γενική υποχρέωση που προβλέπεται στο σημείο 2, οι υπεύθυνοι επιχειρήσεων τροφίμων πρέπει να τηρούν τις κατάλληλες κοινοτικές και εθνικές νομοθετικές διατάξεις που αφορούν τον έλεγχο των πηγών κινδύνου στην πρωτογενή παραγωγή και τις συναφείς εργασίες, συμπεριλαμβανομένων:	Is "hazard" translated as "source of danger/hazard" ("πηγές κινδύνου") in "food hazards"?
EL	hazard	15	(f) to store and handle wastes and hazardous substances so as to prevent contamination;	στ) η αποθήκευση και ο χειρισμός των αποβλήτων και των επικίνδυνων ουσιών να γίνεται έτσι ώστε να προλαμβάνεται η μόλυνση και	Is "hazardous" translated as "questionable" ("επικίνδυνων ουσιών") in "hazardous and/or inedible substances"?
EL	hazard	15	7. Food business operators are to keep and retain records relating to measures put in place to control hazards in an appropriate manner and for an appropriate period, commensurate with the nature and size of the food business. Food business operators are to make relevant information contained in these records available to the competent authority and receiving food business operators on request.	7. Οι υπεύθυνοι επιχειρήσεων τροφίμων καταρτίζουν καταλλήλως και τηρούν επί κατάλληλο χρονικό διάστημα, ανάλογο με τη φύση και το μέγεθος της επιχείρησης τροφίμων, αρχεία σχετικά με τα μέτρα που λαμβάνονται για τον έλεγχο των πηγών κινδύνου. Οι υπεύθυνοι θέτουν στη διάθεση των αρμόδιων αρχών και των υπευθύνων επιχειρήσεων τροφίμων που παραλαμβάνουν τα προϊόντα τους, τα στοιχεία που περιλαμβάνοντα…	Is "hazard" translated as "source of danger/hazard" ("πηγές κινδύνου") in "food hazards"?
EL	hazard	15	1. National and Community guides referred to in Articles 7 to 9 of this Regulation should contain guidance on good hygiene practice for the control of hazards in primary production and associated operations.	1. Οι εθνικοί και οι κοινοτικοί οδηγοί που αναφέρονται στα άρθρα 7 έως 9 του παρόντος κανονισμού θα πρέπει να περιλαμβάνουν οδηγίες σχετικά με την ορθή πρακτική υγιεινής για τον έλεγχο των πηγών κινδύνου κατά την πρωτογενή παραγωγή και τις συναφείς εργασίες.	Is "hazard" translated as "source of danger/hazard" ("πηγές κινδύνου") in "food hazards"?
EL	hazard	15	2. Guides to good hygiene practice should include appropriate information on hazards that may arise in primary production and associated operations and actions to control hazards, including relevant measures set out in Community and national legislation or national and Community programmes. Examples of such hazards and measures may include:	2. Οι οδηγοί ορθής υγιεινής πρακτικής θα πρέπει να περιλαμβάνουν τις δέουσες πληροφορίες σχετικά με τις πηγές κινδύνου που είναι δυνατόν να προκύψουν κατά την πρωτογενή παραγωγή και τις συναφείς εργασίες και τις δράσεις για τον έλεγχο των πηγών κινδύνου, καθώς και τα δέοντα μέτρα που προβλέπονται από την κοινοτική και την εθνική νομοθεσία ή από τα εθνικά και κοινοτικά προγράμματα. Στους κινδύνους…	Is "hazard" translated as "source of danger/hazard" ("πηγές κινδύνου") in "food hazards"?
EL	hazard	19	(f) adequate arrangements and/or facilities for the hygienic storage and disposal of hazardous and/or inedible substances and waste (whether liquid or solid) are to be available;	στ) πρέπει να υπάρχουν κατάλληλες διατάξεις ή/και εγκαταστάσεις για την υγιεινή αποθήκευση και διάθεση των επικίνδυνων ή/και μη βρώσιμων στερεών ή υγρών ουσιών και αποβλήτων·	Is "hazardous" translated as "questionable" ("επικίνδυνων ουσιών") in "hazardous and/or inedible substances"?
EL	hazard	22	5. Steam used directly in contact with food is not to contain any substance that presents a hazard to health or is likely to contaminate the food	5. Ο ατμός που χρησιμοποιείται σε άμεση επαφή με τρόφιμα πρέπει να είναι απαλλαγμένος από κάθε ουσία που παρουσιάζει κίνδυνο για την υγεία ή ενδέχεται να μολύνει τα τρόφιμα.	Is "hazard" translated as "source of danger/hazard" ("πηγές κινδύνου") in "food hazards"?
EL	hazard	24	(c) awareness of food safety hazards and of the importance of food safety and hygiene by all employees in the business;	γ) ευαισθητοποίηση σχετικά με τους κινδύνους για την ασφάλεια των τροφίμων και τη σημασία της ασφάλειας και της υγιεινής των τροφίμων από όλους τους εργαζομένους στην επιχείρηση·	Is "hazard" translated as "source of danger/hazard" ("πηγές κινδύνου") in "food hazards"?
Language	Term	Location (doc page)	English	Translation	Observation	EU-FORA fellow reply
EL	risk	22	2. No person suffering from, or being a carrier of a disease likely to be transmitted through food or afflicted, for example, with infected wounds, skin infections, sores or diarrhoea is to be permitted to handle food or enter any food-handling area in any capacity if there is any likelihood of direct or indirect contamination. Any person so affected and employed in a food business and who is lik…	2. Απαγορεύεται ο χειρισμός των τροφίμων και η με οποιαδήποτε ιδιότητα είσοδος σε χώρους εργασίας με τρόφιμα οποιουδήποτε προσώπου πάσχει από νόσημα ή είναι φορέας νοσήματος που μεταδίδεται διά των τροφών ή προσώπου με μολυσμένα τραύματα ή πάσχει από δερματική μόλυνση, έλκη ή διάρροια, εάν υφίσταται κίνδυνος άμεσης ή έμμεσης μόλυνσης. Κάθε πρόσωπο απασχολούμενο σε επιχείρηση τροφίμων το οποίο έχε…	Is "likelihood of direct and indirect contamination" translated as "immediate risk" ("κίνδυνος άμεσης")? Is it acceptable? Should it be translated "πιθανότητα άμεσης και έμμεσης μόλυνση" or in another way?
EL	risk	23	8. Hazardous and/or inedible substances, including animal feed, are to be adequately labelled and stored in separate and secure containers.	8. Οι επικίνδυνες ή/και μη εδώδιμες ουσίες, συμπεριλαμβανομένων των ζωοτροφών, πρέπει να φέρουν την κατάλληλη επισήμανση και να αποθηκεύονται σε χωριστά και ασφαλή δοχεία.	Is "hazardous" translated as "risky" ("εδώδιμες ουσίες" in "hazardous and/or inedible substance")?

## Sheet: REG 853-2004
Old version
Language	Term	Location (doc page)	English	Translation	Observation	EU-FORA fellow reply
EL	hazard	2	(2) Certain foodstuffs may present specific hazards to human health, requiring the setting of specific hygiene rules. This is particularly the case for food of animal origin, in which microbiological and chemical hazards have frequently been reported.	(2) Ορισµένα τρόφιµα ενδέχεται να παρουσιάζουν ειδικούς κινδύνους για την ανθρώπινη υγεία, οι οποίοι απαιτούν τη θέσπιση ειδικών κανόνων υγιεινής. Αυτό συµβαίνει ιδίως για τα τρόφιµα ζωικής προέλευσης, στα οποία έχουν διαπιστωθεί συχνά µικροβιολογικοί και χηµικοί κίνδυνοι.	Is "hazards" translated as "risks" ("κινδύνους/κίνδυνοι) in "hazards to human health" and "microbiological and chemical hazards"?
EL	hazard	3	(7) The requirement in Regulation (EC) No /2004 ∗ whereby food business operators carrying out any stage of production, processing and distribution of food after primary production and associated operations must put in place, implement and maintain procedures based on hazard analysis and critical control point (HACCP) principles also permits simplification.	(7) Η απαίτηση του κανονισµού (ΕΚ) αριθ. /2004∗ να θεσπίζουν, να εφαρµόζουν και να διατηρούν οι υπεύθυνοι επιχειρήσεων τροφίµων, οι οποίοι σε οποιοδήποτε στάδιο παράγουν, µεταποιούν και διανέµουν τρόφιµα µετά την πρωτογενή παραγωγή και εκτελούν συναφείς εργασίες, διαδικασίες βασιζόµενες στις αρχές ανάλυσης κινδύνου και κρίσιµων σηµείων ελέγχου (HACCP), συµβάλλει επίσης στην απλούστευση.	Is "hazard" translated as "risks ("κινδύνου) in "hazard analysis"?
EL	hazard	8	(22) In order to ensure proper inspection of hunted wild game placed on the Community market, bodies of hunted animals and their viscera should be presented for official post-mortem inspection at a game-handling establishment. However, to preserve certain hunting traditions without prejudicing food safety, it is appropriate to provide for training for hunters who place wild game on the market for…	(22) Προκειµένου να εξασφαλισθεί η κατάλληλη επιθεώρηση των αγρίων θηραµάτων που διατίθενται στην κοινοτική αγορά, τα σώµατα και τα εντόσθια των θηραµάτων, θα πρέπει να προσκοµίζονται για επίσηµη υγειονοµική επιθεώρηση, µετά τη σφαγή, σε κέντρο διαχείρισης θηραµάτων. Εντούτοις, για να διατηρηθούν ορισµένες κυνηγετικές παραδόσεις χωρίς να τεθεί σε κίνδυνο η διατροφική ασφάλεια, είναι σκόπιµο να πρ…	Is "hazards" translated as "risks" ("κινδύνους) in "anomalies or hazards"?
EL	hazard	25	3. Member States may, without compromising achievement of the objectives of this Regulation, adopt, in accordance with paragraphs 4 to 8, national measures adapting the requirements laid down in Annex III.	3. Τα κράτη µέλη δύνανται, χωρίς να τίθεται σε κίνδυνο η επίτευξη των στόχων του παρόντος κανονισµού, να θεσπίζουν σύµφωνα µε τις παραγράφους 4 έως 8, εθνικά µέτρα για την προσαρµογή των απαιτήσεων που καθορίζονται στο Παράρτηµα ΙΙΙ.	Is "compromising" translated using the word for "risk" ("κίνδυνο")? Is the translation acceptable?
EL	hazard	26	(c) explain the reasons for the adaptation, including, where relevant, by providing a summary of the hazard analysis carried out and any measures to be taken to ensure that the adaptation will not compromise the objectives of this Regulation; and	(γ) εξηγεί τους λόγους της προσαρµογής, επισυνάπτοντας, εφ’ όσον χρειάζεται, µια περίληψη της ανάλυσης κινδύνου που έχει διενεργηθεί καθώς και τα τυχόν µέτρα που πρέπει να ληφθούν ώστε να εξασφαλισθεί ότι η προσαρµογή δεν θέτει σε κίνδυνο τους στόχους του κανονισµού, και	Is "hazard" translated as "risk" ("κινδύνου ") in "hazard analysis"?
EL	hazard	28	8) to specify criteria for determining when epidemiological data indicate that a fishing ground does not present a health hazard with regard to the presence of parasites and, consequently, for determining when the competent authority may authorise food business operators not to freeze fishery products in accordance with Annex III, Section VIII, Chapter III, Part D;	8) να καθορισθούν κριτήρια που ορίζουν πότε τα επιδηµιολογικά δεδοµένα δείχνουν ότι ένας τόπος αλίευσης δεν παρουσιάζει κίνδυνο για την υγεία ως προς την ύπαρξη παρασίτων και, κατά συνέπεια, πότε η αρµόδια αρχή δύναται να επιτρέπει στους υπεύθυνους επιχειρήσεων τροφίµων να µην καταψύξουν αλιευτικά προϊόντα σύµφωνα µε το Παράρτηµα ΙΙΙ, Τµήµα VIII, Κεφάλαιο ΙΙΙ, µέρος ∆,	Is "hazard" translated as "risk" ("κινδύνο") in "health hazard"?
EL	hazard	43	1. Food business operators operating slaughterhouses must ensure that the procedures that they have put in place in accordance with the general requirements of Article 5 of Regulation (EC) No …/2004 ∗ meet the requirements that the hazard analysis shows to be necessary and the specific requirements listed in paragraph 2.	1. Οι υπεύθυνοι επιχειρήσεων τροφίµων που λειτουργούν σφαγεία εξασφαλίζουν ότι υπάρχουν διαδικασίες σύµφωνα µε τις γενικές απαιτήσεις του άρθρου 5 του κανονισµού (ΕΚ) αριθ. …/2004 * , οι οποίες πληρούν τις απαιτήσεις που κρίνονται αναγκαίες ύστερα από την ανάλυση κινδύνου καθώς και τις ειδικές απαιτήσεις του σηµείου 2	Is "hazard" translated as "risk" ("κινδύνου ") in "hazard analysis"?
EL	hazard	96	(c) Any water intake must be situated in a position that avoids contamination of the water supply	(γ) Οι τυχόν αγωγοί άντλησης νερού πρέπει να βρίσκονται σε θέση τέτοια, ώστε να αποφεύγεται ο κίνδυνος µόλυνσης του αντλούµενου νερού.	Is the word "risk" used in the Greek version to express "avoids contamination"? Is the translation acceptable?
EL	hazard	114	(a) epidemiological data are available indicating that the fishing grounds of origin do not present a health hazard with regard to the presence of parasites; and	(α) τα διαθέσιµα επιδηµιολογικά δεδοµένα δείχνουν ότι τα αλιευτικά πεδία καταγωγής δεν παρουσιάζουν κίνδυνο για την υγεία ως προς την ύπαρξη παρασίτων, και	Is "hazard" translated as "risk" ("κινδύνο") in "health hazard"?
EL	hazard	134	5. After breaking, each particle of the liquid egg must undergo processing as quickly as possible to eliminate microbiological hazards or to reduce them to an acceptable level. A batch that has been insufficiently processed may immediately undergo processing again in the same establishment if this processing renders it fit for human consumption. Where a batch is found to be unfit for human consum…	5. μετά το σπάσιμο, κάθε μέρος του αυγού σε υγρή κατάσταση πρέπει να υποβάλλεται σε μεταποίηση το ταχύτερο δυνατόν για την εξάλειψη των μικροβιολογικών κινδύνων ή τη μείωσή τους σε αποδεκτά επίπεδα. Μια παρτίδα που έχει υποστεί ανεπαρκή μεταποίηση μπορεί να υποβάλλεται αμέσως και πάλι σε μεταποίηση στην ίδια εγκατάσταση, υπό τον όρο ότι η νέα αυτή μεταποίηση θα την καταστήσει κατάλληλη για κατανά…	Is "hazards" translated as "risks" ("κινδύνων" in "microbiological hazards"?
EL	hazard	136	4. Frogs and snails must be subjected to an organoleptic examination carried out by sampling. If that examination indicates that they might present a hazard, they must not be used for human consumption.	4. οι βάτραχοι και τα σαλιγκάρια πρέπει να υποβάλλονται σε οργανοληπτική εξέταση με δειγματοληψία. Εάν η εξέταση αυτή δείξει ότι ενδέχεται να περικλείουν κάποιον κίνδυνο, δεν πρέπει να χρησιμοποιούνται για ανθρώπινη κατανάλωση·	Is "hazard" translated as "risk" ("κινδύνο") in "present a hazard"?
EL	hazard	137	6. After killing, snails' hepato-pancreas must, if it might present a hazard, be removed and not be used for human consumption	6. μετά τη θανάτωση το ήπαρ - πάγκρεας των σαλιγκαριών πρέπει, αν ενδέχεται να περικλείει κάποιον κίνδυνο, να αφαιρείται και να μην χρησιμοποιείται για ανθρώπινη κατανάλωση	Is "hazard" translated as "risk" ("κινδύνο") in "present a hazard"?
Language	Term	Location (doc page)	English	Translation	Observation	EU-FORA fellow reply
EL	risk	134	2. Eggs must be broken in a manner that minimises contamination, in particular by ensuring adequate separation from other operations. Cracked eggs must be processed as soon as possible.	2. τα αυγά πρέπει να σπάζονται κατά τρόπο ώστε να ελαχιστοποιείται ο κίνδυνος μόλυνσης, ιδίως διασφαλίζοντας κατάλληλο διαχωρισμό από άλλες εργασίες. Τα ραγισμένα αυγά πρέπει να μεταποιούνται το συντομότερο δυνατό·	Is the word "risk" ("κίνδυνος") used in the Greek translation for expressing "minimises contamination"? Is the translation acceptable?
New version
Language	Term	Location (doc page)	English	Translation	Observation	EU-FORA fellow reply
EL	hazard	11	(i) the criteria for determining when epidemiological data indicate that a fishing ground does not present a health hazard with regard to the presence of parasites and, consequently, for determining when the competent authority may authorise food business operators not to freeze fishery products in accordance with Annex III, Section VIII, Chapter III, Part D;	θ) τον καθορισμό κριτηρίων που ορίζουν πότε τα επιδημιολογικά δεδομένα δείχνουν ότι ένας τόπος αλίευσης δεν παρουσιάζει κίνδυνο για την υγεία ως προς την ύπαρξη παρασίτων και, κατά συνέπεια, πότε η αρμόδια αρχή δύναται να επιτρέπει στους υπεύθυνους επιχειρήσεων τροφίμων να μην καταψύξουν αλιευτικά προϊόντα σύμφωνα με το παράρτημα III τμήμα VIII κεφάλαιο III μέρος Δ·	Is "hazard" translated as "risk" ("κινδύνο") in "health hazard"?
EL	hazard	11	3. Member States may, without compromising achievement of the objectives of this Regulation, adopt, in accordance with paragraphs 4 to 8, national measures adapting the requirements laid down in Annex III.	3. Τα κράτη μέλη δύνανται, χωρίς να τίθεται σε κίνδυνο η επίτευξη των στόχων του παρόντος κανονισμού, να θεσπίζουν σύμφωνα με τις παραγράφους 4 έως 8, εθνικά μέτρα για την προσαρμογή των απαιτήσεων που καθορίζονται στο παράρτημα ΙΙΙ.	Is "compromising" translated as "risk" ("κίνδυνο")? Is the translation acceptable?
EL	hazard	12	(c) explain the reasons for the adaptation, including, where relevant, by providing a summary of the hazard analysis carried out and any measures to be taken to ensure that the adaptation will not compromise the objectives of this Regulation;	γ) εξηγεί τους λόγους της προσαρμογής, επισυνάπτοντας, εφόσον χρειάζεται, μια περίληψη της ανάλυσης κινδύνου που έχει διενεργηθεί καθώς και τα τυχόν μέτρα που πρέπει να ληφθούν ώστε να εξασφαλισθεί ότι η προσαρμογή δεν θέτει σε κίνδυνο τους στόχους του κανονισμού,	Is "hazard" translated as "risk" ("κινδύνου") in "hazard analysis"?
EL	hazard	21	1. Food business operators operating slaughterhouses must ensure that the procedures that they have put in place in accordance with the general requirements of Article 5 of Regulation (EC) No 852/2004 meet the requirements that the hazard analysis shows to be necessary and the specific requirements listed in point 2.	1. Οι υπεύθυνοι επιχειρήσεων τροφίμων που λειτουργούν σφαγεία εξασφαλίζουν ότι υπάρχουν διαδικασίες σύμφωνα με τις γενικές απαιτήσεις του άρθρου 5 του κανονισμού (ΕΚ) αριθ. 852/2004, οι οποίες πληρούν τις απαιτήσεις που κρίνονται αναγκαίες ύστερα από την ανάλυση κινδύνου καθώς και τις ειδικές απαιτήσεις του σημείου 2.	Is "hazard" translated as risk ("κινδύνου") in "hazard analysis"?
EL	hazard	66	(i) there are epidemiological data available indicating that the fishing grounds of origin do not present a health hazard with regard to the presence of parasites; and	i) τα διαθέσιμα επιδημιολογικά δεδομένα δείχνουν ότι τα αλιευτικά πεδία καταγωγής δεν παρουσιάζουν κίνδυνο για την υγεία ως προς την ύπαρξη παρασίτων, και	Is "hazard" translated as "risk" ("κινδύνο") in "health hazard"?
EL	hazard	66	(d) derived from fish farming, cultured from embryos and have been fed exclusively on a diet that cannot contain viable parasites that present a health hazard, and one of the following requirements is complied with:	δ) προέρχονται από ιχθυοκαλλιέργεια εμβρύων και έχουν τραφεί αποκλειστικά με τροφές που δεν είναι δυνατόν να περιέχουν βιώσιμα παράσιτα που παρουσιάζουν κίνδυνο για την υγεία, και ικανοποιείται μία από τις ακόλουθες απαιτήσεις:	Is "hazard" translated as "risk" ("κινδύνο") in "health hazard"?
EL	hazard	66	(ii) the food business operator verifies through procedures, approved by the competent authority, that the fishery products do not represent a health hazard with regard to the presence of viable parasites	ii) ο υπεύθυνος της επιχείρησης τροφίμων επιβεβαιώνει, μέσω διαδικασιών εγκεκριμένων από την αρμόδια αρχή, ότι τα αλιευτικά προϊόντα δεν παρουσιάζουν κίνδυνο για την υγεία ως προς την ύπαρξη βιώσιμων παρασίτων.	Is "hazard" translated as "risk" ("κινδύνο") in "health hazard"?
EL	hazard	66	(b) Before placing on the market fishery products referred to in points 3(c) and (d) which have not undergone the freezing treatment or which are not intended to undergo before consumption a treatment that kills viable parasites that present a health hazard, a food business operator must ensure that the fishery products originate from a fishing ground or fish farming which complies with the speci…	β) Πριν από τη διάθεση στην αγορά των προϊόντων αλιείας που αναφέρονται στα σημεία 3 γ) και δ) τα οποία δεν έχουν υποβληθεί σε επεξεργασία κατάψυξης ή δεν πρόκειται να υποβληθούν πριν από την κατανάλωση σε επεξεργασία για την καταστροφή των βιώσιμων παρασίτων που παρουσιάζουν κίνδυνο για την υγεία, ο υπεύθυνος της επιχείρησης τροφίμων πρέπει να εξασφαλίζει ότι τα αλιευτικά προϊόντα προέρχονται απ…	Is "hazard" translated as "risk" ("κινδύνο") in "health hazard"?
EL	hazard	77	5. After breaking, each particle of the liquid egg must undergo processing as quickly as possible to eliminate microbiological hazards or to reduce them to an acceptable level. A batch that has been insufficiently processed may immediately undergo processing again in the same establishment if this processing renders it fit for human consumption. Where a batch is found to be unfit for human consum…	5. μετά το σπάσιμο, κάθε μέρος του αυγού σε υγρή κατάσταση πρέπει να υποβάλλεται σε μεταποίηση το ταχύτερο δυνατόν για την εξάλειψη των μικροβιολογικών κινδύνων ή τη μείωσή τους σε αποδεκτά επίπεδα. Μια παρτίδα που έχει υποστεί ανεπαρκή μεταποίηση μπορεί να υποβάλλεται αμέσως και πάλι σε μεταποίηση στην ίδια εγκατάσταση, υπό τον όρο ότι η νέα αυτή μεταποίηση θα την καταστήσει κατάλληλη για κατανά…	Is "hazards" translated as "risks" ("κινδύνων" in "microbiological hazards"?
EL	hazard	78	4. Frogs and snails must be subjected to an organoleptic examination carried out by sampling. If that examination indicates that they might present a hazard, they must not be used for human consumption.	4. οι βάτραχοι και τα σαλιγκάρια πρέπει να υποβάλλονται σε οργανοληπτική εξέταση με δειγματοληψία. Εάν η εξέταση αυτή δείξει ότι ενδέχεται να περικλείουν κάποιον κίνδυνο, δεν πρέπει να χρησιμοποιούνται για ανθρώπινη κατανάλωση·	Is "hazard" translated as "risk" ("κινδύνο") in "present a hazard"?
EL	hazard	78	6. After killing, snails' hepato-pancreas must, if it might present a hazard, be removed and not be used for human consumption	6. μετά τη θανάτωση το ήπαρ - πάγκρεας των σαλιγκαριών πρέπει, αν ενδέχεται να περικλείει κάποιον κίνδυνο, να αφαιρείται και να μην χρησιμοποιείται για ανθρώπινη κατανάλωση	Is "hazard" translated as "risk" ("κινδύνο") in "present a hazard"?
Language	Term	Location (doc page)	English	Translation	Observation	EU-FORA fellow reply
EL	hazard	12	(c) explain the reasons for the adaptation, including, where relevant, by providing a summary of the hazard analysis carried out and any measures to be taken to ensure that the adaptation will not compromise the objectives of this Regulation;	γ) εξηγεί τους λόγους της προσαρμογής, επισυνάπτοντας, εφόσον χρειάζεται, μια περίληψη της ανάλυσης κινδύνου που έχει διενεργηθεί καθώς και τα τυχόν μέτρα που πρέπει να ληφθούν ώστε να εξασφαλισθεί ότι η προσαρμογή δεν θέτει σε κίνδυνο τους στόχους του κανονισμού,	Is "compromise" translated as risk ("κίνδυνο")? Is the translation acceptable?
EL	hazard	25	1. (a) Slaughterhouses must have adequate and hygienic lairage facilities or, climate permitting, waiting pens that are easy to clean and disinfect. These facilities must be equipped for watering the animals and, if necessary, feeding them. The drainage of the wastewater must not compromise food safety	1. α) Τα σφαγεία υποχρεούνται να διαθέτουν κατάλληλους και υγιεινούς χώρους σταβλισμού ή, εάν οι κλιματολογικές συνθήκες το επιτρέπουν, μαντριά για την παραμονή των ζώων που να καθαρίζονται και να απολυμαίνονται εύκολα. Οι χώροι αυτοί πρέπει να είναι εξοπλισμένοι κατάλληλα για το πότισμα των ζώων και, εάν χρειάζεται, για τη σίτισή τους. Η αποχέτευση των υγρών αποβλήτων δεν πρέπει να θέτει σε κίνδ…	Is "compromise" translated as risk ("κίνδυνο")? Is the translation acceptable?
EL	risk	77	2. Eggs must be broken in a manner that minimises contamination, in particular by ensuring adequate separation from other operations. Cracked eggs must be processed as soon as possible.	2. τα αυγά πρέπει να σπάζονται κατά τρόπο ώστε να ελαχιστοποιείται ο κίνδυνος μόλυνσης, ιδίως διασφαλίζοντας κατάλληλο διαχωρισμό από άλλες εργασίες. Τα ραγισμένα αυγά πρέπει να μεταποιούνται το συντομότερο δυνατό·	Is the word "risk" ("κίνδυνος") used in the Greek translation for expressing "minimises contamination"? Is the translation acceptable?

## Sheet: REG 625-2017
Old version
Language	Term	Location (doc page)	English	Translation	Observation	EU-FORA fellow reply
EL	hazard	2	(6) Transmissible animal diseases, including by micro-organisms that have developed resistance to antimicrobials, may have a significant impact on public health, food and feed safety, and animal health and welfare. In order to ensure high standards of animal and public health in the Union, rules on animal health measures and on feed and food safety are laid down at Union level. Compliance with th…	(6) Οι μεταδοτικές νόσοι των ζώων, μεταξύ άλλων μέσω των μικροοργανισμών που έχουν αναπτύξει μικροβιακή αντοχή, μπορούν να έχουν σημαντικές επιπτώσεις στη δημόσια υγεία, στην ασφάλεια των τροφίμων και των ζωοτροφών, στην υγεία των ζώων και στην καλή διαβίωση των ζώων. Προκειμένου να εξασφαλιστούν υψηλά πρότυπα υγείας των ζώων και δημόσιας υγείας στην Ένωση, οι κανόνες σχετικά με τα μέτρα για την …	Is "threats" translated using the word for "risk" ("κινδύνου")? Is the translation acceptable?
EL	hazrad	5	(25) Union agri-food chain legislation entrusts additionally the competent authorities of the Member States with specialised tasks to be carried out for the protection of animal health, plant health and animal welfare and for the protection of the environment in relation to GMOs and plant protection products. Those tasks are the public interest activities which the competent authorities of the Me…	(25) Η νομοθεσία της Ένωσης για την αγροδιατροφική αλυσίδα αναθέτει επιπλέον στις αρμόδιες αρχές των κρατών μελών εξειδικευμένα καθήκοντα τα οποία πρέπει να εκτελούν για την προστασία της υγείας των ζώων, της υγείας των φυτών και της καλής μεταχείρισης των ζώων, και για την προστασία του περιβάλλοντος από τους ΓΤΟ και τα φυτοπροστατευτικά προϊόντα. Τα καθήκοντα αυτά είναι δραστηριότητες δημόσιου …	Is "hazard" translated as "risk factor" ("παραγόντων κινδύνου")?
EL	hazard	20	(23) ‘hazard’ means any agent or condition with the potential to have an adverse effect on human, animal or plant health, animal welfare or the environment;	23) «παράγοντας κινδύνου»: οποιοσδήποτε παράγοντας ή κατάσταση που έχει δυνητικά δυσμενή επίδραση στην υγεία των ανθρώπων, των ζώων ή των φυτών, στην καλή μεταχείριση των ζώων ή στο περιβάλλον;	Is "hazard" translated as "risk factor" ("παραγόντων κινδύνου")?
EL	hazard	29	(d) an assessment of procedures on good manufacturing practices, good hygiene practices, good farming practices, and of procedures based on the principles of hazard analysis critical control points (HACCP);	δ) αξιολόγηση των διαδικασιών που αφορούν τις ορθές βιομηχανικές πρακτικές, τις ορθές πρακτικές υγιεινής, τις ορθές γεωργικές πρακτικές και των διαδικασιών που βασίζονται στις αρχές του συστήματος;	Is "hazard" translated as "risk factor" ("παραγόντων κινδύνου") in "hazard analysis"?
EL	hazard	33	(a) specific requirements for the performance of official controls and the uniform minimum frequency of those official controls, having regard to the specific hazards and risks which exist in relation to each product of animal origin and the different processes it undergoes, where a minimum level of official controls is necessary to respond to recognised uniform hazards and risks which might be p…	α) ειδικές απαιτήσεις για τη διενέργεια των επίσημων ελέγχων και την ενιαία ελάχιστη συχνότητα των εν λόγω επίσημων ελέγχων, λαμβανομένων υπόψη των ειδικών παραγόντων κινδύνου και των κινδύνων που υφίστανται σε σχέση με κάθε προϊόν ζωικής προέλευσης και των διαφόρων επεξεργασιών στις οποίες υποβάλλεται, όταν απαιτείται ελάχιστο επίπεδο επίσημων ελέγχων για την αντιμετώπιση αναγνωρισμένων ενιαίων …	Is "hazard" translated as "risk factor" ("παραγόντων κινδύνου") in "hazards and risks"?
EL	hazard	33	(f) specific requirements for the performance of official controls and the uniform minimum frequency for those official controls on raw milk, milk products and fishery products, where a minimum level of official controls is necessary to respond to recognised uniform hazards and risks they might pose.	στ) ειδικές απαιτήσεις για τη διενέργεια των επίσημων ελέγχων και ενιαία ελάχιστη συχνότητα των εν λόγω επίσημων ελέγχων όσον αφορά το νωπό γάλα, τα γαλακτοκομικά προϊόντα και τα αλιευτικά προϊόντα, όταν απαιτείται ένα ελάχιστο επίπεδο επίσημων ελέγχων για την αντιμετώπιση αναγνωρισμένων ενιαίων παραγόντων κινδύνου και κινδύνων που μπορεί να ενέχουν.	Is "hazard" translated as "risk factor" ("παραγόντων κινδύνου") in "hazards and risks"?
EL	hazard	34	(a) specific requirements for the performance of official controls, including, where appropriate, the range of samples and the stage of production, processing and distribution where the samples are to be taken in compliance with the methods to be used for sampling and laboratory analyses established in accordance with points (a) and (b) of Article 34(6), having regard to the specific hazards and …	α) ειδικές απαιτήσεις για τη διενέργεια επίσημων ελέγχων, συμπεριλαμβανομένων, κατά περίπτωση, του φάσματος δειγμάτων και του σταδίου παραγωγής, μεταποίησης και διανομής κατά το οποίο πρόκειται να ληφθούν τα δείγματα σύμφωνα με τις μεθόδους που πρέπει να χρησιμοποιούνται για τη δειγματοληψία και τις εργαστηριακές αναλύσεις που θεσπίζονται δυνάμει του άρθρου 34 παράγραφος 6 στοιχεία α) και β), λαμ…	Is "hazard" translated as "risk factor" ("παραγόντων κινδύνου") in "hazards and risks"?
EL	hazard	34	(a) uniform minimum frequency of such official controls, having regard to the hazards and risks related to substances referred to in paragraph 1	α) ενιαία ελάχιστη συχνότητα των εν λόγω επίσημων ελέγχων, λαμβανομένων υπόψη των παραγόντων κινδύνου και των κινδύνων που σχετίζονται με τις αναφερόμενες στην παράγραφο 1 ουσίες·	Is "hazard" translated as "risk factor" ("παραγόντων κινδύνου") in "hazards and risks"?
EL	hazard	34	(a) specific requirements for the performance of official controls on animals, products of animal origin and germinal products to respond to recognised hazards and risks to human and animal health by means of official controls performed to verify compliance with disease prevention and control measures laid down in accordance with the rules referred to in point (d) of Article 1(2);	α) ειδικές απαιτήσεις για τη διενέργεια επίσημων ελέγχων στα ζώα, στα προϊόντα ζωικής προέλευσης και στο ζωικό αναπαραγωγικό υλικό για την αντιμετώπιση αναγνωρισμένων παραγόντων κινδύνου και κινδύνων για την υγεία των ανθρώπων και των ζώων μέσω επίσημων ελέγχων που διενεργούνται ώστε να εξακριβωθεί η συμμόρφωση με τα μέτρα πρόληψης και ελέγχου των νόσων τα οποία καθορίζονται σύμφωνα με τους κανόν…	Is "hazard" translated as "risk factor" ("παραγόντων κινδύνου") in "hazards and risks"?
EL	hazard	34	(b) specific requirements for the performance of official controls on animal by-products and derived products to respond to specific hazards and risks to human and animal health by means of official controls performed to verify compliance with the rules referred to in point (e) of Article 1(2);	β) ειδικές απαιτήσεις για τη διενέργεια επίσημων ελέγχων στα ζωικά υποπροϊόντα και στα παράγωγα προϊόντα για την αντιμετώπιση συγκεκριμένων παραγόντων κινδύνου και κινδύνων για την υγεία των ανθρώπων και των ζώων μέσω επίσημων ελέγχων που διενεργούνται ώστε να εξακριβωθεί η συμμόρφωση με τους κανόνες που αναφέρονται στο άρθρο 1 παράγραφος 2 στοιχείο ε)·	Is "hazard" translated as "risk factor" ("παραγόντων κινδύνου") in "hazards and risks"?
EL	hazard	34	a) uniform minimum frequency of such official controls on animals, products of animal origin and germinal products where a minimum level of official controls is necessary to respond to recognised uniform hazards and risks to human and animal health by means of official controls performed to verify compliance with disease prevention and control measures laid down in accordance with the rules refer…	α) ενιαία ελάχιστη συχνότητα των εν λόγω επίσημων ελέγχων στα ζώα, στα προϊόντα ζωικής προέλευσης και στο ζωικό αναπαραγωγικό υλικό, όταν απαιτείται ελάχιστο επίπεδο επίσημων ελέγχων για την αντιμετώπιση αναγνωρισμένων ενιαίων παραγόντων κινδύνου και κινδύνων για την υγεία των ανθρώπων και των ζώων μέσω επίσημων ελέγχων που διενεργούνται ώστε να εξακριβωθεί η συμμόρφωση με τα μέτρα πρόληψης και ε…	Is "hazard" translated as "risk factor" ("παραγόντων κινδύνου") in "hazards and risks"?
EL	hazard	34	(b) uniform minimum frequency of such official controls on animal-by-products and derived products where a minimum level of official controls is necessary to respond to specific hazards and risks to human and animal health by means of official controls performed to verify compliance with the rules referred to in point (e) of Article 1(2).	β) ενιαία ελάχιστη συχνότητα των εν λόγω επίσημων ελέγχων στα ζωικά υποπροϊόντα και στα παράγωγα προϊόντα, όταν απαιτείται ελάχιστο επίπεδο επίσημων ελέγχων για την αντιμετώπιση συγκεκριμένων παραγόντων κινδύνου και κινδύνων για την υγεία των ανθρώπων και των ζώων μέσω επίσημων ελέγχων που διενερ	Is "hazard" translated as "risk factor" ("παραγόντων κινδύνου") in "hazards and risks"?
EL	hazard	37	a) specific requirements for the performance of such official controls on the introduction into and movement in the Union of particular plants, plant products, and other objects subject to the rules referred to in point (g) of Article 1(2), to respond to recognised hazards and risks to plant health in relation to specific plants, plant products and other objects of a particular origin or provenan…	α) ειδικές απαιτήσεις για τη διενέργεια τέτοιων επίσημων ελέγχων σχετικά με την είσοδο και τη διακίνηση στην Ένωση συγκεκριμένων φυτών, φυτικών προϊόντων, και άλλων αντικειμένων που υπόκεινται στους κανόνες οι οποίοι αναφέρονται στο άρθρο 1 παράγραφος 2 στοιχείο ζ), για την αντιμετώπιση αναγνωρισμένων παραγόντων κινδύνου και κινδύνων για την υγεία των φυτών που συνδέονται με συγκεκριμένα φυτά, φυ…	Is "hazard" translated as "risk factor" ("παραγόντων κινδύνου") in "hazards and risks"?
EL	hazard	37	(a) uniform minimum frequency of such official controls, where a minimum level of official control is necessary to respond to recognised uniform hazards and risks to plant health in relation to specific plants, plant products and other objects of a particular origin or provenance;	α) ενιαία ελάχιστη συχνότητα των εν λόγω επίσημων ελέγχων, όταν απαιτείται ένα ελάχιστο επίπεδο επίσημων ελέγχων για την αντιμετώπιση αναγνωρισμένων ενιαίων παραγόντων κινδύνου και κινδύνων για την υγεία των φυτών που συνδέονται με συγκεκριμένα φυτά, φυτικά προϊόντα και άλλα αντικείμενα συγκεκριμένης καταγωγής ή προέλευσης·	Is "hazard" translated as "risk factor" ("παραγόντων κινδύνου") in "hazards and risks"?
EL	hazard	38	(a) specific requirements for the performance of official controls to respond to recognised uniform hazards and risks of:	α) ειδικές απαιτήσεις για τη διενέργεια επίσημων ελέγχων για την αντιμετώπιση αναγνωρισμένων ενιαίων παραγόντων κινδύνου και κινδύνων:	Is "hazard" translated as "risk factor" ("παραγόντων κινδύνου") in "hazards and risks"?
EL	hazard	38	3. The Commission may, by means of implementing acts, lay down rules on uniform practical arrangements for the performance of the official controls referred to in paragraph 1, taking into account the need to ensure a minimum level of official controls to prevent practices that infringe those rules regarding uniform minimum frequency of such official controls where a minimum level of official cont…	3. Μέσω εκτελεστικών πράξεων η Επιτροπή μπορεί να θεσπίζει κανόνες για ενιαίες πρακτικές ρυθμίσεις για τη διενέργεια των επίσημων ελέγχων που αναφέρονται στην παράγραφο 1, λαμβάνοντας υπόψη την ανάγκη να εξασφαλιστεί ελάχιστο επίπεδο επίσημων ελέγχων ώστε να εμποδιστούν πρακτικές που παραβιάζουν τους κανόνες οι οποίοι αφορούν την ενιαία ελάχιστη συχνότητα των εν λόγω επίσημων ελέγχων, όταν απαιτε…	Is "hazard" translated as "risk factor" ("παραγόντων κινδύνου") in "hazards and risks"?
EL	hazard	39	a) specific requirements for the performance of such official controls to respond to recognised uniform hazards and risks which might be posed by plant protection products, concerning the manufacture, placing on the market, entry into the Union, labelling, packaging, transport, storage and use of plant protection products to ensure their safe and sustainable use and to combat their illegal trade;…	α) ειδικές απαιτήσεις για τη διενέργεια των εν λόγω επίσημων ελέγχων για την αντιμετώπιση αναγνωρισμένων ενιαίων παραγόντων κινδύνου και κινδύνων που ενδέχεται να προκαλούνται από φυτοπροστατευτικά προϊόντα όσον αφορά την παρασκευή, τη διάθεση στην αγορά, την είσοδο στην Ένωση, την επισήμανση, τη συσκευασία, τη μεταφορά, την αποθήκευση και τη χρήση φυτοπροστατευτικών προϊόντων, ώστε να εξασφαλίζε…	Is "hazard" translated as "risk factor" ("παραγόντων κινδύνου") in "hazards and risks"?
EL	hazard	39	(a) uniform minimum frequency of such official controls, where a minimum level of official control is necessary to respond to recognised uniform hazards and risks which might be posed by plant protection products, concerning the manufacture, placing on the market, entry into the Union, labelling, packaging, transport, storage and use of plant protection products to ensure their safe and sustainab…	α) ενιαία ελάχιστη συχνότητα των εν λόγω επίσημων ελέγχων, όταν απαιτείται ελάχιστο επίπεδο επίσημων ελέγχων για την αντιμετώπιση αναγνωρισμένων ενιαίων παραγόντων κινδύνου και κινδύνων που ενδέχεται να προκαλούνται από φυτοπροστατευτικά προϊόντα όσον αφορά την παρασκευή, τη διάθεση στην αγορά, την είσοδο στην Ένωση, την επισήμανση, τη συσκευασία, τη μεταφορά, την αποθήκευση και τη χρήση φυτοπροσ…	Is "hazard" translated as "risk factor" ("παραγόντων κινδύνου" in "hazards and risks"?
EL	hazard	41	(a) uniform specific requirements for the performance of official controls to respond to the specific hazards and risks which exist in relation to each category of food and feed and the different processes it undergoes; and	α) ενιαίες ειδικές απαιτήσεις για τη διενέργεια επίσημων ελέγχων για την αντιμετώπιση των ειδικών παραγόντων κινδύνου και κινδύνων που σχετίζονται με κάθε κατηγορία τροφίμων και ζωοτροφών και τις διάφορες επεξεργασίες στις οποίες υποβάλλονται· και	Is "hazard" translated as "risk factor" ("παραγόντων κινδύνου" in "hazards and risks"?
EL	hazard	41	2. The Commission may, by means of implementing acts, lay down rules on uniform practical arrangements on official controls performed on certain categories of food or feed to verify compliance with the rules referred to in points (a) to (e) of Article 1(2) to address newly identified risks which may arise through food or feed to human or animal health or, in relation to GMOs and plant protection …	2. Μέσω εκτελεστικών πράξεων η Επιτροπή μπορεί να θεσπίζει κανόνες για ενιαίες πρακτικές ρυθμίσεις για τους επίσημους ελέγχους που διενεργούνται σε ορισμένες κατηγορίες τροφίμων ή ζωοτροφών ώστε να εξακριβωθεί η συμμόρφωση με τους κανόνες που αναφέρονται στο άρθρο 1 παράγραφος 2 στοιχεία α) έως ε) για την αντιμετώπιση πρόσφατα εντοπισθέντων κινδύνων τους οποίους ενδεχομένως προκαλούν τα τρόφιμα ή…	Is "hazard" translated as "risk factor" ("παραγόντων κινδύνου" in "hazards and risks"?
EL	hazard	44	2. Where relevant, appropriate and technically feasible, having regard in particular to the prevalence and distribution of the hazard in the animals or goods, to the perishability of the samples or the goods and to the amount of available substrate, the competent authorities shall:	2. Εφόσον είναι σκόπιμο, ενδεδειγμένο και τεχνικά εφικτό λαμβανομένων υπόψη, ειδικότερα, του επιπολασμού και της κατανομής του παράγοντα κινδύνου στα ζώα ή στα αγαθά, του ευαλλοίωτου χαρακτήρα των δειγμάτων ή των αγαθών και της ποσότητας του διαθέσιμου υποστρώματος, οι αρμόδιες αρχές:	Is hazard translated as risk factor ("παραγόντων κινδύνου" in "hazard in the animals"?
EL	hazard	84	With a view to conducting Union-wide targeted assessment of the state of application of the rules referred to in Article 1(2) or establishing the prevalence of certain hazards across the Union, the Commission may adopt implementing acts concerning	Η Επιτροπή, προκειμένου να διενεργήσει στοχευμένη αξιολόγηση σε ολόκληρη την Ένωση σχετικά με την κατάσταση της εφαρμογής των κανόνων που αναφέρονται στο άρθρο 1 παράγραφος 2 ή να προσδιορίσει την επικράτηση ορισμένων παραγόντων κινδύνου στο σύνολο της Ένωσης, δύναται να εκδώσει εκτελεστικές πράξεις σχετικά με:	Is risk factor translated like hazard ("παράγοντες κινδύνου" in "certain hazards"?
EL	hazard	91	(c) the performance by the competent authorities of the third country of adequate official controls and other activities to assess the presence of hazards for human, animal or plant health, for animal welfare or, in relation to GMOs and plant protection products, also for the environment;	γ) τη διενέργεια εκ μέρους των αρμόδιων αρχών της τρίτης χώρας επαρκών επίσημων ελέγχων και άλλων δραστηριοτήτων για την αξιολόγηση της παρουσίας παραγόντων κινδύνου για την υγεία των ανθρώπων, των ζώων ή των φυτών, για την καλή μεταχείριση των ζώων ή, σε σχέση με τους ΓΤΟ και τα φυτοπροστατευτικά προϊόντα, και για το περιβάλλον·	Is hazard translated as risk factor ("παραγόντων κινδύνου") in "presence of hazards"?
EL	hazard	91	(d) the regularity and rapidity of information supplied by the third country on the presence of hazards for human, animal or plant health, for animal welfare or, in relation to GMOs and plant protection products, also for the environment;	δ) την τακτικότητα και την ταχύτητα των πληροφοριών που παρέχονται από την τρίτη χώρα σχετικά με την παρουσία παραγόντων κινδύνου για την υγεία των ανθρώπων, των ζώων ή των φυτών, για την καλή μεταχείριση των ζώων ή επίσης για το περιβάλλον σε σχέση με τους ΓΤΟ και τα φυτοπροστατευτικά προϊόντα·	Is hazard translated as risk factor ("παραγόντων κινδύνου") in "presence of hazards"?
EL	hazard	115	5. The hazards in the production, processing and distribution of animals and goods	5. Οι παράγοντες κινδύνου κατά την παραγωγή, μεταποίηση και διανομή ζώων και αγαθών	Is hazard translated as risk factor ("παραγόντων κινδύνου") in "hazards in the production"?
Language	Term	Location (doc page)	English	Translation	Observation	EU-FORA fellow reply
EL	risk	-	-	-	-
New version
Language	Term	Location (doc page)	English	Translation	Observation	EU-FORA fellow reply
EL	hazard	6	(23) ‘hazard’ means any agent or condition with the potential to have an adverse effect on human, animal or plant health, animal welfare or the environment;	(23) «παράγοντας κινδύνου»: οποιοσδήποτε παράγοντας ή κατάσταση που έχει δυνητικά δυσμενή επίδραση στην υγεία των ανθρώπων, των ζώων ή των φυτών, στην καλή μεταχείριση των ζώων ή στο περιβάλλον·	Is "hazard" translated as "risk factor" ("παραγόντων κινδύνου")?
EL	hazard	18	(d) an assessment of procedures on good manufacturing practices, good hygiene practices, good farming practices, and of procedures based on the principles of hazard analysis critical control points (HACCP);	δ) αξιολόγηση των διαδικασιών που αφορούν τις ορθές βιομηχανικές πρακτικές, τις ορθές πρακτικές υγιεινής, τις ορθές γεωργικές πρακτικές και των διαδικασιών που βασίζονται στις αρχές του συστήματος ανάλυσης παραγόντων κινδύνου και κρίσιμων σημείων ελέγχου (hazard analysis critical control points — «HACCP»)·	Is "hazard" translated as "risk factor" ("παραγόντων κινδύνου") in "hazard analysis" and English (hazard analysis critical control points — «HACCP»)? Is the translation acceptable?
EL	hazard	24	(a) specific requirements for the performance of official controls and the uniform minimum frequency of those official controls, having regard to the specific hazards and risks which exist in relation to each product of animal origin and the different processes it undergoes, where a minimum level of official controls is necessary to respond to recognised uniform hazards and risks which might be p…	α) ειδικές απαιτήσεις για τη διενέργεια των επίσημων ελέγχων και την ενιαία ελάχιστη συχνότητα των εν λόγω επίσημων ελέγχων, λαμβανομένων υπόψη των ειδικών παραγόντων κινδύνου και των κινδύνων που υφίστανται σε σχέση με κάθε προϊόν ζωικής προέλευσης και των διαφόρων επεξεργασιών στις οποίες υποβάλλεται, όταν απαιτείται ελάχιστο επίπεδο επίσημων ελέγχων για την αντιμετώπιση αναγνωρισμένων ενιαίων …	Is "hazard" translated as "risk factor" ("παραγόντων κινδύνου" in "hazards and risks"?
EL	hazard	23	(f) specific requirements for the performance of official controls and the uniform minimum frequency for those official controls on raw milk, milk products and fishery products, where a minimum level of official controls is necessary to respond to recognised uniform hazards and risks they might pose.	στ) ειδικές απαιτήσεις για τη διενέργεια των επίσημων ελέγχων και ενιαία ελάχιστη συχνότητα των εν λόγω επίσημων ελέγχων όσον αφορά το νωπό γάλα, τα γαλακτοκομικά προϊόντα και τα αλιευτικά προϊόντα, όταν απαιτείται ένα ελάχιστο επίπεδο επίσημων ελέγχων για την αντιμετώπιση αναγνωρισμένων ενιαίων παραγόντων κινδύνου και κινδύνων που μπορεί να ενέχουν.	Is "hazard" translated as "risk factor" ("παραγόντων κινδύνου") in "hazards and risks"?
EL	hazard	25	(a) specific requirements for the performance of official controls, including, where appropriate, the range of samples and the stage of production, processing and distribution where the samples are to be taken in compliance with the methods to be used for sampling and laboratory analyses established in accordance with points (a) and (b) of Article 34(6), having regard to the specific hazards and …	α) ειδικές απαιτήσεις για τη διενέργεια επίσημων ελέγχων, συμπεριλαμβανομένων, κατά περίπτωση, του φάσματος δειγμάτων και του σταδίου παραγωγής, μεταποίησης και διανομής κατά το οποίο πρόκειται να ληφθούν τα δείγματα σύμφωνα με τις μεθόδους που πρέπει να χρησιμοποιούνται για τη δειγματοληψία και τις εργαστηριακές αναλύσεις που θεσπίζονται δυνάμει του άρθρου 34 παράγραφος 6 στοιχεία α) και β), λαμ…	Is "hazard" translated as "risk factor" ("παραγόντων κινδύνου") in "hazards and risks"?
EL	hazard	25	(a) uniform minimum frequency of such official controls, having regard to the hazards and risks related to substances referred to in paragraph 1	α) ενιαία ελάχιστη συχνότητα των εν λόγω επίσημων ελέγχων, λαμβανομένων υπόψη των παραγόντων κινδύνου και των κινδύνων που σχετίζονται με τις αναφερόμενες στην παράγραφο 1 ουσίες·	Is "hazard" translated as "risk factor" ("παραγόντων κινδύνου") in "hazards and risks"?
EL	hazard	25	(a) specific requirements for the performance of official controls on animals, products of animal origin and germinal products to respond to recognised hazards and risks to human and animal health by means of official controls performed to verify compliance with disease prevention and control measures laid down in accordance with the rules referred to in point (d) of Article 1(2);	α) ειδικές απαιτήσεις για τη διενέργεια επίσημων ελέγχων στα ζώα, στα προϊόντα ζωικής προέλευσης και στο ζωικό αναπαραγωγικό υλικό για την αντιμετώπιση αναγνωρισμένων παραγόντων κινδύνου και κινδύνων για την υγεία των ανθρώπων και των ζώων μέσω επίσημων ελέγχων που διενεργούνται ώστε να εξακριβωθεί η συμμόρφωση με τα μέτρα πρόληψης και ελέγχου των νόσων τα οποία καθορίζονται σύμφωνα με τους κανόν…	Is "hazard" translated as "risk factor" ("παραγόντων κινδύνου") in "hazards and risks"?
EL	hazard	25	(b) specific requirements for the performance of official controls on animal by-products and derived products to respond to specific hazards and risks to human and animal health by means of official controls performed to verify compliance with the rules referred to in point (e) of Article 1(2);	β) ειδικές απαιτήσεις για τη διενέργεια επίσημων ελέγχων στα ζωικά υποπροϊόντα και στα παράγωγα προϊόντα για την αντιμετώπιση συγκεκριμένων παραγόντων κινδύνου και κινδύνων για την υγεία των ανθρώπων και των ζώων μέσω επίσημων ελέγχων που διενεργούνται ώστε να εξακριβωθεί η συμμόρφωση με τους κανόνες που αναφέρονται στο άρθρο 1 παράγραφος 2 στοιχείο ε)·	Is "hazard" translated as "risk factor" ("παραγόντων κινδύνου") in "hazards and risks"?
EL	hazard	26	(a) uniform minimum frequency of such official controls on animals, products of animal origin and germinal products where a minimum level of official controls is necessary to respond to recognised uniform hazards and risks to human and animal health by means of official controls performed to verify compliance with disease prevention and control measures laid down in accordance with the rules refe…	α) ενιαία ελάχιστη συχνότητα των εν λόγω επίσημων ελέγχων στα ζώα, στα προϊόντα ζωικής προέλευσης και στο ζωικό αναπαραγωγικό υλικό, όταν απαιτείται ελάχιστο επίπεδο επίσημων ελέγχων για την αντιμετώπιση αναγνωρισμένων ενιαίων παραγόντων κινδύνου και κινδύνων για την υγεία των ανθρώπων και των ζώων μέσω επίσημων ελέγχων που διενεργούνται ώστε να εξακριβωθεί η συμμόρφωση με τα μέτρα πρόληψης και ε…	Is "hazard" translated as "risk factor" ("παραγόντων κινδύνου") in "hazards and risks"?
EL	hazard	26	(b) uniform minimum frequency of such official controls on animal-by-products and derived products where a minimum level of official controls is necessary to respond to specific hazards and risks to human and animal health by means of official controls performed to verify compliance with the rules referred to in point (e) of Article 1(2).	β) ενιαία ελάχιστη συχνότητα των εν λόγω επίσημων ελέγχων στα ζωικά υποπροϊόντα και στα παράγωγα προϊόντα, όταν απαιτείται ελάχιστο επίπεδο επίσημων ελέγχων για την αντιμετώπιση συγκεκριμένων παραγόντων κινδύνου και κινδύνων για την υγεία των ανθρώπων και των ζώων μέσω επίσημων ελέγχων που διενερ	Is "hazard" translated as "risk factor" ("παραγόντων κινδύνου") in "hazards and risks"?
EL	hazard	29	a) specific requirements for the performance of such official controls on the introduction into and movement in the Union of particular plants, plant products, and other objects subject to the rules referred to in point (g) of Article 1(2), to respond to recognised hazards and risks to plant health in relation to specific plants, plant products and other objects of a particular origin or provenan…	α) ειδικές απαιτήσεις για τη διενέργεια τέτοιων επίσημων ελέγχων σχετικά με την είσοδο και τη διακίνηση στην Ένωση συγκεκριμένων φυτών, φυτικών προϊόντων, και άλλων αντικειμένων που υπόκεινται στους κανόνες οι οποίοι αναφέρονται στο άρθρο 1 παράγραφος 2 στοιχείο ζ), για την αντιμετώπιση αναγνωρισμένων παραγόντων κινδύνου και κινδύνων για την υγεία των φυτών που συνδέονται με συγκεκριμένα φυτά, φυ…	Is "hazard" translated as "risk factor" ("παραγόντων κινδύνου") in "hazards and risks"?
EL	hazard	29	(a) uniform minimum frequency of such official controls, where a minimum level of official control is necessary to respond to recognised uniform hazards and risks to plant health in relation to specific plants, plant products and other objects of a particular origin or provenance;	α) ενιαία ελάχιστη συχνότητα των εν λόγω επίσημων ελέγχων, όταν απαιτείται ένα ελάχιστο επίπεδο επίσημων ελέγχων για την αντιμετώπιση αναγνωρισμένων ενιαίων παραγόντων κινδύνου και κινδύνων για την υγεία των φυτών που συνδέονται με συγκεκριμένα φυτά, φυτικά προϊόντα και άλλα αντικείμενα συγκεκριμένης καταγωγής ή προέλευσης·	Is "hazard" translated as "risk factor" ("παραγόντων κινδύνου") in "hazards and risks"?
EL	hazard	30	(a) specific requirements for the performance of official controls to respond to recognised uniform hazards and risks of:	α) ειδικές απαιτήσεις για τη διενέργεια επίσημων ελέγχων για την αντιμετώπιση αναγνωρισμένων ενιαίων παραγόντων κινδύνου και κινδύνων:	Is "hazard" translated as "risk factor" ("παραγόντων κινδύνου") in "hazards and risks"?
EL	hazard	31	(2) Regulation (EU) No 649/2012 of the European Parliament and of the Council of 4 July 2012 concerning the export and import of hazardous chemicals (OJ L 201, 27.7.2012, p. 60).	(2) Κανονισμός (ΕΕ) αριθ. 649/2012 του Ευρωπαϊκού Κοινοβουλίου και του Συμβουλίου, της 4ης Ιουλίου 2012, σχετικά με τις εξαγωγές και εισαγωγές επικίνδυνων χημικών προϊόντων (ΕΕ L 201 της 27.7.2012, σ. 60).	Is "hazardous| translated as "dangerous" ("επικίνδυνων")?
EL	hazard	32	3. The Commission may, by means of implementing acts, lay down rules on uniform practical arrangements for the performance of the official controls referred to in paragraph 1, taking into account the need to ensure a minimum level of official controls to prevent practices that infringe those rules regarding uniform minimum frequency of such official controls where a minimum level of official cont…	3. Μέσω εκτελεστικών πράξεων η Επιτροπή μπορεί να θεσπίζει κανόνες για ενιαίες πρακτικές ρυθμίσεις για τη διενέργεια των επίσημων ελέγχων που αναφέρονται στην παράγραφο 1, λαμβάνοντας υπόψη την ανάγκη να εξασφαλιστεί ελάχιστο επίπεδο επίσημων ελέγχων ώστε να εμποδιστούν πρακτικές που παραβιάζουν τους κανόνες οι οποίοι αφορούν την ενιαία ελάχιστη συχνότητα των εν λόγω επίσημων ελέγχων, όταν απαιτε…	Is "hazard" translated as "risk factor" ("παραγόντων κινδύνου") in "hazards and risks"?
EL	hazard	32	a) specific requirements for the performance of such official controls to respond to recognised uniform hazards and risks which might be posed by plant protection products, concerning the manufacture, placing on the market, entry into the Union, labelling, packaging, transport, storage and use of plant protection products to ensure their safe and sustainable use and to combat their illegal trade;…	α) ειδικές απαιτήσεις για τη διενέργεια των εν λόγω επίσημων ελέγχων για την αντιμετώπιση αναγνωρισμένων ενιαίων παραγόντων κινδύνου και κινδύνων που ενδέχεται να προκαλούνται από φυτοπροστατευτικά προϊόντα όσον αφορά την παρασκευή, τη διάθεση στην αγορά, την είσοδο στην Ένωση, την επισήμανση, τη συσκευασία, τη μεταφορά, την αποθήκευση και τη χρήση φυτοπροστατευτικών προϊόντων, ώστε να εξασφαλίζε…	Is "hazard" translated as "risk factor" ("παραγόντων κινδύνου") in "hazards and risks"?
EL	hazard	32	(a) uniform minimum frequency of such official controls, where a minimum level of official control is necessary to respond to recognised uniform hazards and risks which might be posed by plant protection products, concerning the manufacture, placing on the market, entry into the Union, labelling, packaging, transport, storage and use of plant protection products to ensure their safe and sustainab…	α) ενιαία ελάχιστη συχνότητα των εν λόγω επίσημων ελέγχων, όταν απαιτείται ελάχιστο επίπεδο επίσημων ελέγχων για την αντιμετώπιση αναγνωρισμένων ενιαίων παραγόντων κινδύνου και κινδύνων που ενδέχεται να προκαλούνται από φυτοπροστατευτικά προϊόντα όσον αφορά την παρασκευή, τη διάθεση στην αγορά, την είσοδο στην Ένωση, την επισήμανση, τη συσκευασία, τη μεταφορά, την αποθήκευση και τη χρήση φυτοπροσ…	Is "hazard" translated as "risk factor" ("παραγόντων κινδύνου") in "hazards and risks"?
EL	hazard	34	(a) uniform specific requirements for the performance of official controls to respond to the specific hazards and risks which exist in relation to each category of food and feed and the different processes it undergoes; and	α) ενιαίες ειδικές απαιτήσεις για τη διενέργεια επίσημων ελέγχων για την αντιμετώπιση των ειδικών παραγόντων κινδύνου και κινδύνων που σχετίζονται με κάθε κατηγορία τροφίμων και ζωοτροφών και τις διάφορες επεξεργασίες στις οποίες υποβάλλονται· και	Is "hazard" translated as "risk factor" ("παραγόντων κινδύνου") in "hazards and risks"?
EL	hazard	35	2. The Commission may, by means of implementing acts, lay down rules on uniform practical arrangements on official controls performed on certain categories of food or feed to verify compliance with the rules referred to in points (a) to (e) of Article 1(2) to address newly identified risks which may arise through food or feed to human or animal health or, in relation to GMOs and plant protection …	2. Μέσω εκτελεστικών πράξεων η Επιτροπή μπορεί να θεσπίζει κανόνες για ενιαίες πρακτικές ρυθμίσεις για τους επίσημους ελέγχους που διενεργούνται σε ορισμένες κατηγορίες τροφίμων ή ζωοτροφών ώστε να εξακριβωθεί η συμμόρφωση με τους κανόνες που αναφέρονται στο άρθρο 1 παράγραφος 2 στοιχεία α) έως ε) για την αντιμετώπιση πρόσφατα εντοπισθέντων κινδύνων τους οποίους ενδεχομένως προκαλούν τα τρόφιμα ή…	Is "hazard" translated as "risk factor" ("παραγόντων κινδύνου") in "hazards and risks"?
EL	hazard	39	2. Where relevant, appropriate and technically feasible, having regard in particular to the prevalence and distribution of the hazard in the animals or goods, to the perishability of the samples or the goods and to the amount of available substrate, the competent authorities shall:	2. Εφόσον είναι σκόπιμο, ενδεδειγμένο και τεχνικά εφικτό λαμβανομένων υπόψη, ειδικότερα, του επιπολασμού και της κατανομής του παράγοντα κινδύνου στα ζώα ή στα αγαθά, του ευαλλοίωτου χαρακτήρα των δειγμάτων ή των αγαθών και της ποσότητας του διαθέσιμου υποστρώματος, οι αρμόδιες αρχές:	Is "hazard" translated as "risk factor" ("παραγόντων κινδύνου") in "hazard in the animals"?
EL	hazard	94	With a view to conducting Union-wide targeted assessment of the state of application of the rules referred to in Article 1(2) or establishing the prevalence of certain hazards across the Union, the Commission may adopt implementing acts concerning	Η Επιτροπή, προκειμένου να διενεργήσει στοχευμένη αξιολόγηση σε ολόκληρη την Ένωση σχετικά με την κατάσταση της εφαρμογής των κανόνων που αναφέρονται στο άρθρο 1 παράγραφος 2 ή να προσδιορίσει την επικράτηση ορισμένων παραγόντων κινδύνου στο σύνολο της Ένωσης, δύναται να εκδώσει εκτελεστικές πράξεις σχετικά με:	Is "hazard" translated as "risk factor" ("παραγόντων κινδύνου") in "certain hazards"?
EL	hazard	103	(c) the performance by the competent authorities of the third country of adequate official controls and other activities to assess the presence of hazards for human, animal or plant health, for animal welfare or, in relation to GMOs and plant protection products, also for the environment;	γ) τη διενέργεια εκ μέρους των αρμόδιων αρχών της τρίτης χώρας επαρκών επίσημων ελέγχων και άλλων δραστηριοτήτων για την αξιολόγηση της παρουσίας παραγόντων κινδύνου για την υγεία των ανθρώπων, των ζώων ή των φυτών, για την καλή μεταχείριση των ζώων ή, σε σχέση με τους ΓΤΟ και τα φυτοπροστατευτικά προϊόντα, και για το περιβάλλον·	Is "hazard" translated as "risk factor" ("παραγόντων κινδύνου") in "hazards for human"?
EL	hazard	103	(d) the regularity and rapidity of information supplied by the third country on the presence of hazards for human, animal or plant health, for animal welfare or, in relation to GMOs and plant protection products, also for the environment;	δ) την τακτικότητα και την ταχύτητα των πληροφοριών που παρέχονται από την τρίτη χώρα σχετικά με την παρουσία παραγόντων κινδύνου για την υγεία των ανθρώπων, των ζώων ή των φυτών, για την καλή μεταχείριση των ζώων ή επίσης για το περιβάλλον σε σχέση με τους ΓΤΟ και τα φυτοπροστατευτικά προϊόντα·	Is "hazard" translated as "risk factor" ("παραγόντων κινδύνου") in "hazards for human"?
EL	hazard	136	5. The hazards in the production, processing and distribution of animals and goods	5. Οι παράγοντες κινδύνου κατά την παραγωγή, μεταποίηση και διανομή ζώων και αγαθών	Is "hazard" translated as "risk factor" ("παραγόντων κινδύνου") in "hazards in production"?
Language	Term	Location (doc page)	English	Translation	Observation	EU-FORA fellow reply
EL	risk	-	-	-	-

## Sheet: REG 1381-2019
Single version
Language	Term	Location (doc page)	English	Translation	Observation	EU-FORA fellow reply
EL	hazard	2	(6) Given the ambiguity in the public perception of the difference between hazard and risk, risk communication should endeavour to clarify that distinction and thereby ensure that such distinction is better understood by the general public.	(6) Δεδομένης της ασάφειας που επικρατεί στην αντίληψη του κοινού σχετικά με τη διαφορά μεταξύ πηγής κινδύνου και κινδύνου, η ενημέρωση σχετικά με τον κίνδυνο θα πρέπει να επιδιώκει να αποσαφηνίσει αυτήν τη διάκριση και, κατ' αυτόν τον τρόπο, να διασφαλίσει την καλύτερη κατανόησή της από το ευρύ κοινό.	Is hazard translated as "source of risk" in "hazard and risk"?
EL	hazard	2	(10) The general plan on risk communication should identify the key factors to be taken into account when considering the type and level of risk communication activities needed, such as the different levels of risk, the nature of the risk and its potential impact on human health, animal health and, where relevant, the environment, who and what are directly or indirectly affected by the risk, the …	(10) Το γενικό σχέδιο για την ενημέρωση σχετικά με τον κίνδυνο θα πρέπει να προσδιορίζει τους βασικούς παράγοντες που πρέπει να συνεκτιμώνται κατά την εξέταση του είδους και του επιπέδου των απαιτούμενων δραστηριοτήτων ενημέρωσης σχετικά με τον κίνδυνο, όπως τα διαφορετικά επίπεδα κινδύνου, η φύση του κινδύνου και ο δυνητικός του αντίκτυπος στη δημόσια υγεία, την υγεία των ζώων και, κατά περίπτωσ…	Is hazard translated as "source of risk" in "exposure to a hazard"?
EL	hazard	5	(28) It is therefore necessary to strengthen the transparency of the risk assessment in a proactive manner. All scientific data and information supporting requests for authorisations or for approvals under Union law as well as other requests for scientific output should be made publicly available in a proactive manner and be easily accessible as early as possible in the risk assessment process. H…	(28) Είναι, επομένως, απαραίτητο να ενισχυθεί η διαφάνεια της διαδικασίας αξιολόγησης του κινδύνου με προδραστικό τρόπο. Όλα τα επιστημονικά δεδομένα και όλες οι επιστημονικές πληροφορίες που υποστηρίζουν τις αιτήσεις έγκρισης ή άδειας βάσει της ενωσιακής νομοθεσίας, καθώς και άλλα αιτήματα για επιστημονικά αποτελέσματα θα πρέπει να δημοσιοποιούνται προδραστικά και να είναι εύκολα προσβάσιμα, σε …	Is the word for "hazard" ("κίνδυνο") used to translate "jeoperdising" in "without jeopardising the proactive character of disclosure to the public and the easy public access to the disclosed data and information." ? Is the translation acceptable?
Language	Term	Location (doc page)	English	Translation	Observation	EU-FORA fellow reply
EL	risk	-	-	-	-
