# Supplementary material for: Food Risk Analysis: Towards a Better Understanding of „Hazard” and „Risk” in EU food legislation
Source: Preprints.org preprint supplement (doi:10.20944/preprints202306.1556.v1), 2023-06-21
Supplement: Supplementary file 8 [file EN.xlsx]

## Sheet: REG 178-2002
Old version
Language	Term	Location (doc page)	English	Translation	Observation	EU-FORA fellow reply
EN	hazard	-	-	-	-	-
Language	Term	Location (doc page)	English	Translation	Observation	EU-FORA fellow reply
EN	risk	-	-	-	-	-
New version
Language	Term	Location (doc page)	English	Translation	Observation	EU-FORA fellow reply
EN	hazard	-	-	-	-	-
Language	Term	Location (doc page)	English	Translation	Observation	EU-FORA fellow reply
EN	risk	-	-	-	-	-

## Sheet: REG 852-2004
Old version
Language	Term	Location (doc page)	English	Translation	Observation	EU-FORA fellow reply
EN	hazard	-	-	-	-	-
Language	Term	Location (doc page)	English	Translation	Observation	EU-FORA fellow reply
EN	risk	-	-	-	-	-
New version
Language	Term	Location (doc page)	English	Translation	Observation	EU-FORA fellow reply
EN	hazard	-	-	-	-	-
Language	Term	Location (doc page)	English	Translation	Observation	EU-FORA fellow reply
EN	risk	-	-	-	-	-

## Sheet: REG 853-2004
Old version
Language	Term	Location (doc page)	English	Translation	Observation	EU-FORA fellow reply
EN	hazard	-	-	-	-	-
Language	Term	Location (doc page)	English	Translation	Observation	EU-FORA fellow reply
EN	risk	-	-	-	-	-
New version
Language	Term	Location (doc page)	English	Translation	Observation	EU-FORA fellow reply
EN	hazard	-	-	-	-	-
Language	Term	Location (doc page)	English	Translation	Observation	EU-FORA fellow reply
EN	risk	-	-	-	-	-

## Sheet: REG 625-2017
Old version
Language	Term	Location (doc page)	English	Translation	Observation	EU-FORA fellow reply
EN	hazard	-	-	-	-	-
Language	Term	Location (doc page)	English	Translation	Observation	EU-FORA fellow reply
EN	risk	-	-	-	-	-
New version
Language	Term	Location (doc page)	English	Translation	Observation	EU-FORA fellow reply
EN	hazard	-	-	-	-	-
Language	Term	Location (doc page)	English	Translation	Observation	EU-FORA fellow reply
EN	risk	-	-	-	-	-

## Sheet: REG 1381-2019
Single version
Language	Term	Location (doc page)	English	Translation	Observation	EU-FORA fellow reply
EN	hazard	-	-	-	-	-
Language	Term	Location (doc page)	English	Translation	Observation	EU-FORA fellow reply
EN	risk	-	-	-	-	-
