# Supplementary material for: Food Risk Analysis: Towards a Better Understanding of „Hazard” and „Risk” in EU food legislation
Source: Preprints.org preprint supplement (doi:10.20944/preprints202306.1556.v1), 2023-06-21
Supplement: Supplementary file 9 [file ES.xlsx]

## Sheet: REG 178-2002
Old version
Language	Term	Location (doc page)	English	Translation	Observation	EU-FORA fellow reply
ES	hazard	-	-	-	-
Language	Term	Location (doc page)	English	Translation	Observation	EU-FORA fellow reply
ES	risk	7	10. ‘risk analysis’ means a process consisting of three interconnected components: risk assessment, risk management and risk communication;	10) «Análisis del riesgo», un proceso formado por tres elementos interrelacionados: determinación del riesgo, gestión del riesgo y comunicación del riesgo	Is "risk assessment" translated as "risk determination" ("determinación del riesgo")? Is the translation acceptable? Should it be translated "evaluación de riesgos/asesoramiento de riesgos" or in another way?
ES	risk	8	12. ‘risk management’ means the process, distinct from risk assessment, of weighing policy alternatives in consultation with interested parties, considering risk assessment and other legitimate factors, and, if need be, selecting appropriate prevention and control options;	12) «Gestión del riesgo», el proceso, distinto del anterior, consistente en sopesar las alternativas políticas en consulta con las partes interesadas, teniendo en cuenta la determinación del riesgo y otros factores pertinentes, y, si es necesario	Is "risk assessment" translated as "risk determination" ("determinación del riesgo")? Is the translation acceptable? Should it be translated "evaluación de riesgos/asesoramiento de riesgos" or in another way?
ES	risk	8	13. ‘risk communication’ means the interactive exchange of information and opinions throughout the risk analysis process as regards hazards and risks, risk-related factors and risk perceptions, among risk assessors, risk managers, consumers, feed and food businesses, the academic community and other interested parties, including the explanation of risk assessment findings and the basis of risk ma…	13) «Comunicación del riesgo», el intercambio interactivo, a lo largo de todo el proceso de análisis del riesgo, de información y opiniones en relación con los factores de peligro y los riesgos, los factores relacionados con el riesgo y las percepciones del riesgo, que se establece entre los responsables de la determinación y los responsables de la gestión del riesgo, los consumidores, las empres…	Is "risk assessment" translated as "risk determination" ("determinación del riesgo")? Is the translation acceptable? Should it be translated "evaluación de riesgos/asesoramiento de riesgos" or in another way?
ES	risk	8	2. Risk assessment shall be based on the available scientific evidence and undertaken in an independent, objective and transparent manner.	2. La determinación del riesgo se basará en las pruebas científicas disponibles y se efectuará de una manera independiente, objetiva y transparente.	Is "risk assessment" translated as "risk determination" ("determinación del riesgo")? Is the translation acceptable? Should it be translated "evaluación de riesgos/asesoramiento de riesgos" or in another way?
ES	risk	8	3. Risk management shall take into account the results of risk assessment, and in particular, the opinions of the Authority referred to in Article 22, other factors legitimate to the matter under consideration and the precautionary principle where the conditions laid down in Article 7(1) are relevant, in order to achieve the general objectives of food law established in Article 5	3. Con objeto de alcanzar los objetivos generales de la legislación alimentaria establecidos en el artículo 5, la gestión del riesgo tendrá en cuenta los resultados de la determinación del riesgo y, en particular, los dictámenes de la Autoridad Europea de Seguridad Alimentaria mencionada en el artículo 22, el principio de cautela cuando sean pertinentes las condiciones mencionadas en el apartado …	Is "risk assessment" translated as "risk determination" ("determinación del riesgo")? Is the translation acceptable? Should it be translated "evaluación de riesgos/asesoramiento de riesgos" or in another way?
ES	risk	9	2. Measures adopted on the basis of paragraph 1 shall be proportionate and no more restrictive of trade than is required to achieve the high level of health protection chosen in the Community, regard being had to technical and economic feasibility and other factors regarded as legitimate in the matter under consideration. The measures shall be reviewed within a reasonable period of time, dependin…	2. Las medidas adoptadas con arreglo al apartado 1 serán proporcionadas y no restringirán el comercio más de lo requerido para alcanzar el nivel elevado de protección de la salud por el que ha optado la Comunidad, teniendo en cuenta la viabilidad técnica y económica y otros factores considerados legítimos para el problema en cuestión. Estas medidas serán revisadas en un plazo de tiempo razonable,…	Is "risk assessment" translated as "risk determination" ("determinación del riesgo")? Is the translation acceptable? Should it be translated "evaluación de riesgos/asesoramiento de riesgos" or in another way?
ES	risk	13	8. The Authority, Commission and Member States shall cooperate to promote the effective coherence between risk assessment, risk management and risk communication functions.	8. La Autoridad, la Comisión y los Estados miembros cooperarán para propiciar la coherencia efectiva entre las funciones de determinación del riesgo, gestión del riesgo y comunicación del riesgo.	Is "risk assessment" translated as "risk determination" ("determinación del riesgo")? Is the translation acceptable? Should it be translated "evaluación de riesgos/asesoramiento de riesgos" or in another way?
ES	risk	13	(c) to provide scientific and technical support to the Commission in the areas within its mission and, when so requested, in the interpretation and consideration of risk assessment opinions;	c) proporcionará a la Comisión apoyo científico y técnico en los ámbitos comprendidos en su cometido y, si así se le solicita, en la interpretación y el examen de los dictámenes de determinación del riesgo;	Is "risk assessment" translated as "risk determination" ("determinación del riesgo")? Is the translation acceptable? Should it be translated "evaluación de riesgos/asesoramiento de riesgos" or in another way?
New version
Language	Term	Location (doc page)	English	Translation	Observation	EU-FORA fellow reply
ES	hazard	-	-	-	-
Language	Term	Location (doc page)	English	Translation	Observation	EU-FORA fellow reply
ES	risk	4	10. ‘risk analysis’ means a process consisting of three interconnected components: risk assessment, risk management and risk communication;	10) «Análisis del riesgo», un proceso formado por tres elementos interrelacionados: determinación del riesgo, gestión del riesgo y comunicación del riesgo	Is "risk assessment" translated as "risk determination" ("determinación del riesgo")? Is the translation acceptable? Should it be translated "evaluación de riesgos/asesoramiento de riesgos" or in another way?
ES	risk	4	12. ‘risk management’ means the process, distinct from risk assessment, of weighing policy alternatives in consultation with interested parties, considering risk assessment and other legitimate factors, and, if need be, selecting appropriate prevention and control options;	12) «Gestión del riesgo», el proceso, distinto del anterior, consistente en sopesar las alternativas políticas en consulta con las partes interesadas, teniendo en cuenta la determinación del riesgo y otros factores pertinentes, y, si es necesario	Is "risk assessment" translated as "risk determination" ("determinación del riesgo")? Is the translation acceptable? Should it be translated "evaluación de riesgos/asesoramiento de riesgos" or in another way?
ES	risk	4	13. ‘risk communication’ means the interactive exchange of information and opinions throughout the risk analysis process as regards hazards and risks, risk-related factors and risk perceptions, among risk assessors, risk managers, consumers, feed and food businesses, the academic community and other interested parties, including the explanation of risk assessment findings and the basis of risk ma…	13) «Comunicación del riesgo», el intercambio interactivo, a lo largo de todo el proceso de análisis del riesgo, de información y opiniones en relación con los factores de peligro y los riesgos, los factores relacionados con el riesgo y las percepciones del riesgo, que se establece entre los responsables de la determinación y los responsables de la gestión del riesgo, los consumidores, las empres…	Is "risk assessment" translated as "risk determination" ("determinación del riesgo")? Is the translation acceptable? Should it be translated "evaluación de riesgos/asesoramiento de riesgos" or in another way?
ES	risk	6	2. Risk assessment shall be based on the available scientific evidence and undertaken in an independent, objective and transparent manner.	2. La determinación del riesgo se basará en las pruebas científicas disponibles y se efectuará de una manera independiente, objetiva y transparente.	Is "risk assessment" translated as "risk determination" ("determinación del riesgo")? Is this appropriate? Should it be translated "evaluación de riesgos/asesoramiento de riesgos" or in another way?
ES	risk	6	3. Risk management shall take into account the results of risk assessment, and in particular, the opinions of the Authority referred to in Article 22, other factors legitimate to the matter under consideration and the precautionary principle where the conditions laid down in Article 7(1) are relevant, in order to achieve the general objectives of food law established in Article 5	3. Con objeto de alcanzar los objetivos generales de la legislación alimentaria establecidos en el artículo 5, la gestión del riesgo tendrá en cuenta los resultados de la determinación del riesgo y, en particular, los dictámenes de la Autoridad Europea de Seguridad Alimentaria mencionada en el artículo 22, el principio de cautela cuando sean pertinentes las condiciones mencionadas en el apartado …	Is there an addition to the translation in the form of "Con objeto de alcanzar los objetivos generales de la legislación alimentaria establecidos en el artículo 5"?Is "risk assessment" translated as "risk determination" ("determinación del riesgo")? Is this appropriate?Should it be translated "evaluación de riesgos/asesoramiento de riesgos"?
ES	risk	6	2. Measures adopted on the basis of paragraph 1 shall be proportionate and no more restrictive of trade than is required to achieve the high level of health protection chosen in the Community, regard being had to technical and economic feasibility and other factors regarded as legitimate in the matter under consideration. The measures shall be reviewed within a reasonable period of time, dependin…	2. Las medidas adoptadas con arreglo al apartado 1 serán proporcionadas y no restringirán el comercio más de lo requerido para alcanzar el nivel elevado de protección de la salud por el que ha optado la Comunidad, teniendo en cuenta la viabilidad técnica y económica y otros factores considerados legítimos para el problema en cuestión. Estas medidas serán revisadas en un plazo de tiempo razonable,…	Is "risk assessment" translated as "risk determination" ("determinación del riesgo")? Is the translation acceptable? Should it be translated "evaluación de riesgos/asesoramiento de riesgos"?
ES	risk	8	(b) provide transparent information at each stage of the risk analysis process from the framing of requests for scientific advice to the provision of risk assessment and the adoption of risk management decisions, including information on how risk management decisions were reached and which factors were considered;	b) dar información transparente en cada fase del proceso de análisis del riesgo, desde la petición de asesoramiento científico hasta el dictamen de determinación del riesgo y la toma de decisiones de gestión del riesgo, en particular información sobre cómo se llegó a las decisiones de gestión del riesgo y qué factores se consideraron;	Is "risk assessment" translated as "risk determination" ("determinación del riesgo")? Is the translation acceptable? Should it be translated "evaluación de riesgos/asesoramiento de riesgos" or in another way?
ES	risk	15	8. The Authority, Commission and Member States shall cooperate to promote the effective coherence between risk assessment, risk management and risk communication functions.	8. La Autoridad, la Comisión y los Estados miembros cooperarán para propiciar la coherencia efectiva entre las funciones de determinación del riesgo, gestión del riesgo y comunicación del riesgo.	Is "risk assessment" translated as "risk determination" ("determinación del riesgo")? Is the translation acceptable? Should it be translated "evaluación de riesgos/asesoramiento de riesgos" or in another way?
ES	risk	15	(c) to provide scientific and technical support to the Commission in the areas within its mission and, when so requested, in the interpretation and consideration of risk assessment opinions;	c) proporcionará a la Comisión apoyo científico y técnico en los ámbitos comprendidos en su cometido y, si así se le solicita, en la interpretación y el examen de los dictámenes de determinación del riesgo;	Is "risk assessment" translated as "risk determination" ("determinación del riesgo")? Is the translation acceptable? Should it be translated "evaluación de riesgos/asesoramiento de riesgos" or in another way?
ES	risk	25	6. Where the Authority detects, during its risk assessment, that studies notified in accordance with paragraph 2 or 3 are not included in the corresponding application or notification in full, and in the absence of a valid justification of the applicant or notifier to that effect, the applicable time limits within which the Authority is required to deliver its scientific output shall be suspended…	6. Cuando la Autoridad detecte, durante su determinación del riesgo, que estudios que se hayan notificado de conformidad con lo dispuesto en los apartados 2 o 3 no se han incluido en su totalidad en la solicitud o notificación correspondiente, y en ausencia de una justificación válida del solicitante o notificante al respecto, se suspenderán los plazos en los que se requiere a la Autoridad que em…	Is "risk assessment" translated as "risk determination" ("determinación del riesgo")? Is the translation acceptable? Should it be translated "evaluación de riesgos/asesoramiento de riesgos"?
ES	risk	25	1. Where the relevant Union law provides that an approval or an authorisation, including by means of a notification, may be renewed, the potential applicant or notifier for the renewal shall notify the Authority of the studies it intends to perform for that purpose, including information on how the various studies are to be carried out to ensure compliance with regulatory requirements. Following …	1. Cuando la normativa pertinente de la Unión establezca la posibilidad de renovar una aprobación o autorización, también mediante notificación, el posible solicitante o notificante de la renovación notificará a la Autoridad los estudios que se propone llevar a cabo a tal efecto, incluida la información sobre cómo van a llevarse a cabo los distintos estudios para garantizar el cumplimiento de los…	Is "risk assessment" translated as "risk determination" ("determinación del riesgo")? Is the translation acceptable? Should it be translated "evaluación de riesgos/asesoramiento de riesgos" or in another way?
ES	risk	26	2. The Authority shall consult stakeholders and the public on the basis of the non-confidential version of the application or notification made public by the Authority in accordance with Articles 38 to 39e, and immediately after such disclosure to the public, in order to identify ehether other relevant scientific data or studies are available on the subject matter concerned by the application or …	2. La Autoridad consultará a las partes interesadas y a la opinión pública a partir de la versión no confidencial de la solicitud o notificación que haya publicado de conformidad con lo dispuesto en los artículos 38 a 39 sexies, e inmediatamente después de tal divulgación pública, a fin de determinar si existen otros datos científicos o estudios pertinentes sobre el objeto de la solicitud o notif…	Is "risk assessment" translated as "risk determination" ("determinación del riesgo")? Is the translation acceptable? Should it be translated "evaluación de riesgos/asesoramiento de riesgos"?
ES	risk	26	Without prejudice to the obligation on applicants to demonstrate the safety of a subject matter submitted to a system of authorisation, the Commission, in exceptional circumstances of serious controversies or conflicting results, may request the Authority to commission scientific studies with the objective of verifying evidence used in its risk assessment process. The studies commissioned may hav…	Sin perjuicio de la obligación que tienen los solicitantes de demostrar la seguridad del objeto sometido al régimen de autorización, la Comisión, en circunstancias excepcionales caracterizadas por graves controversias o resultados contradictorios, podrá pedir a la Autoridad que encargue estudios científicos al objeto de verificar los elementos de prueba utilizados en su proceso de determinación d…	Is "risk assessment" translated as "risk determination" ("determinación del riesgo")? Is the translation acceptable ?Should it be translated "evaluación de riesgos/asesoramiento de riesgos" or in another way?

## Sheet: REG 852-2004
Old version
Language	Term	Location (doc page)	English	Translation	Observation	EU-FORA fellow reply
ES	hazard	-	-	-	-
Language	Term	Location (doc page)	English	Translation	Observation	EU-FORA fellow reply
ES	risk	50	2. No person suffering from, or being a carrier of a disease likely to be transmitted through food or afflicted, for example, with infected wounds, skin infections, sores or diarrhoea is to be permitted to handle food or enter any food-handling area in any capacity if there is any likelihood of direct or indirect contamination. Any person so affected and employed in a food business and who is lik…	2. Las personas que padezcan o sean portadoras de una enfermedad que pueda transmitirse a través de los productos alimenticios, o estén aquejadas, por ejemplo, de heridas infectadas, infecciones cutáneas, llagas o diarrea, no deberán estar autorizadas a manipular los productos alimenticios ni a entrar bajo ningún concepto en zonas de manipulación de productos alimenticios cuando exista riesgo de …	Is "likelihood of direct and indirect contamination" translated as "risk of direct and indirect contamination" ("riesgo de contaminación directa o indirecta")? Is the translation acceptable? Should it be translated " probabilidad de de contaminación directa o indirecta" or in another way?
New version
Language	Term	Location (doc page)	English	Translation	Observation	EU-FORA fellow reply
ES	hazard	-	-	-	-
Language	Term	Location (doc page)	English	Translation	Observation	EU-FORA fellow reply
ES	risk	22	2. No person suffering from, or being a carrier of a disease likely to be transmitted through food or afflicted, for example, with infected wounds, skin infections, sores or diarrhoea is to be permitted to handle food or enter any food-handling area in any capacity if there is any likelihood of direct or indirect contamination. Any person so affected and employed in a food business and who is lik…	2. Las personas que padezcan o sean portadoras de una enfermedad que pueda transmitirse a través de los productos alimenticios, o estén aquejadas, por ejemplo, de heridas infectadas, infecciones cutáneas, llagas o diarrea, no deberán estar autorizadas a manipular los productos alimenticios ni a entrar bajo ningún concepto en zonas de manipulación de productos alimenticios cuando exista riesgo de …	Is "likelihood of direct and indirect contamination" translated as "risk of direct and indirect contamination" ("riesgo de contaminación directa o indirecta")? Is it acceptable? Should it be translated "probabilidad de de contaminación directa o indirecta" or in another way?

## Sheet: REG 853-2004
Old version
Language	Term	Location (doc page)	English	Translation	Observation	EU-FORA fellow reply
ES	hazard	2	(2) Certain foodstuffs may present specific hazards to human health, requiring the setting of specific hygiene rules. This is particularly the case for food of animal origin, in which microbiological and chemical hazards have frequently been reported.	(2) Determinados productos alimenticios pueden presentar peligros para la salud humana, y ello hace necesario el establecer normas higiénicas específicas. Así ocurre en particular con los alimentos de origen animal, con respecto a los cuales se han observado con frecuencia riesgos microbiológicos y químicos.	Is "hazard" translated as "risk" in "microbiological and chemical hazards"?
	hazard	108	6. Where fish are headed and/or gutted on board, such operations must be carried out hygienically as soon as possible after capture, and the products must be washed immediately and thoroughly with potable water or clean water. In that event, the viscera and parts that may constitute a danger to public health must be removed as soon as possible and kept apart from products intended for human consu…	6. En caso de que los peces se descabecen o se evisceren a bordo, dichas operaciones deberán llevarse a cabo de manera higiénica lo antes posible después de su captura, y los productos deberán lavarse inmediatamente y a fondo con agua potable o agua limpia. En ese caso, las vísceras y las partes que puedan representar un peligro para la salud pública se separarán lo antes posible y se mantendrán …	Is "danger" translated as "hazard" ("peligro")? Is this acceptable?
	hazard	134	5. After breaking, each particle of the egg product must undergo processing as quickly as possible to eliminate microbiological hazards or to reduce them to an acceptable level. A batch that has been insufficiently processed may immediately undergo processing again in the same establishment, if this processing renders it fit for human consumption. When a batch is found to be unfit for human consu…	5. Tras la operación de cascado, cada partícula del ovoproducto se someterá lo antes posible a una transformación para eliminar los riesgos microbiológicos o reducirlos a un nivel aceptable. Si un lote se ha transformado insuficientemente, podrá ser sometido inmediatamente a una nueva transformación en el mismo establecimiento, siempre que dicha nueva transformación lo haga apto para el consumo h…	Is "hazard" translated as "risk" in "microbiological and chemical hazards"?
Language	Term	Location (doc page)	English	Translation	Observation	EU-FORA fellow reply
ES	risk	49	2. Animals showing symptoms of disease or originating in herds known to be contaminated with agents of public health importance may only be transported to the slaughterhouse when the competent authority so permits.	2. Los que presenten síntomas de enfermedad y las que procedan de grupos de los que se conozca su contaminación con agentes de riesgo para la salud pública únicamente podrán transportarse al matadero cuando así lo autorice la autoridad competente.	Is "agents of public health importance" translated as "agents of risk for public health" ("agentes de riesgo para la salud pública")? Is the translation acceptable?
	risk	50	2. To avoid contaminating meat, they must:	2. A fin de evitar los riesgos de contaminación de la carne, los mataderos deberán:	Is "avoid contaminating meat" translated as "risks of contamination of meat" ("riesgos de contaminación de la carne")? Is the translation acceptable?
	risk	63	2. Animals showing symptoms of disease or originating in flocks known to be contaminated with agents of public-health importance may only be transported to the slaughterhouse when permitted by the competent authority.	2. Los animales que presenten síntomas de enfermedad o que procedan de grupos de los que se conozca su contaminación con agentes de riesgo para la salud pública sólo podrán ser transportados al matadero cuando así lo autorice la autoridad competente.	Is "agents of public health importance" translated as "agents of risk for public health" ("agentes de riesgo para la salud pública")? Is the translation acceptable?
	risk	64	2. To avoid contaminating meat, they must:	2. A fin de evitar los riesgos de contaminación de la carne, los mataderos deberán:	Is "avoid contaminating meat" translated as "risks of contamination of meat" ("riesgos de contaminación de la carne")? Is the translation acceptable?
ES	risk	145	(a) all ruminant bone material derived from animals born, reared or slaughtered in countries or regions classified as having a low incidence of BSE in accordance with Community legislation is subjected to a process which ensures that all bone material is finely crushed and degreased with hot water and treated with dilute hydrochloric acid (at minimum concentration of 4% and pH < 1.5) over a perio…	a) todos los materiales óseos de rumiantes que procedan de animales nacidos, criados o sacrificados en países o regiones clasificados como de bajo riesgo en relación con la EEB de conformidad con la normativa comunitaria se someten a un proceso que garantice que todos los materiales óseos se trituran finamente, se desgrasan con agua caliente y se tratan con ácido clorhídrico diluido (a una concen…	Is "having a low incidence of BSE" translated as "low risk in relation to BSE" ("bajo riesgo en relación con la EEB")? Is the translation acceptable?
New version
Language	Term	Location (doc page)	English	Translation	Observation	EU-FORA fellow reply
ES	hazard	29	an assessment of procedures on good manufacturing practices, good hygiene practices, good farming practices, and of procedures based on the principles of hazard analysis critical control points (HACCP)	la evaluación de los procedimientos de buenas prácticas de fabricación, prácticas correctas de higiene, buenas prácticas agrícolas, y de los procedimientos basados en los principios de análisis de riesgos y puntos de control críticos (ARPCC)	Is "hazards" translated as "risks"("riesgos") in "risk analysis"?
Language	Term	Location (doc page)	English	Translation	Observation	EU-FORA fellow reply
ES	risk	14	risks to human and animal health and plant health associated with animals and goods; and	los riesgos para la salud humana y animal y los riesgos fitosanitarios asociados con los animales y mercancías, y	Is "plant health risks" translated as "fitosanitary risks" ("riesgos fitosanitarios"). Should "plant health risks" be translated as "riesgos para la sanidad vegetal" or in another way? This type of translation can be later confirmed in document title and page 2, paragraph (3) where it is actually stated "sanidad vegetal"

## Sheet: REG 625-2017
Old version
Language	Term	Location (doc page)	English	Translation	Observation	EU-FORA fellow reply
ES	hazard	29	(d) an assessment of procedures on good manufacturing practices, good hygiene practices, good farming practices, and of procedures based on the principles of hazard analysis critical control points (HACCP)	(d) la evaluación de los procedimientos de buenas prácticas de fabricación, prácticas correctas de higiene, buenas prácticas agrícolas, y de los procedimientos basados en los principios de análisis de riesgos y puntos de control críticos (ARPCC)	Is "hazard" translated as "risks" ("riesgos") in "hazard analysis"?
Language	Term	Location (doc page)	English	Translation	Observation	EU-FORA fellow reply
ES	risk	14	risks to human and animal health and plant health associated with animals and goods; and	los riesgos para la salud humana y animal y los riesgos fitosanitarios asociados con los animales y mercancías, y	Is "plant health risks" translated as "fitosanitary risks" ("riesgos fitosanitarios")? Should "plant health risks" be better translated as "riesgos para la sanidad vegetal" or in another way? This type of translation can be later confirmed in document title and page 2, paragraph (3) where it is actually stated "sanidad vegetal".
New version
Language	Term	Location (doc page)	English	Translation	Observation	EU-FORA fellow reply
ES	hazard	-	-	-	-
Language	Term	Location (doc page)	English	Translation	Observation	EU-FORA fellow reply
ES	risk	19	risks to human and animal health and plant health associated with animals and goods; and	los riesgos para la salud humana y animal y los riesgos fitosanitarios asociados con los animales y mercancías, y	Is "plant health risks" translated as "fitosanitary risks"? Should "plant health risks" be translated as "riesgos para la sanidad vegetal" or in another way? This type of translation can be later confirmed in document title and page 2, paragraph (3) where it is actually stated "sanidad vegetal".

## Sheet: REG 1381-2019
Single version
Language	Term	Location (doc page)	English	Translation	Observation	EU-FORA fellow reply
ES	hazard	-	-	-	-
Language	Term	Location (doc page)	English	Translation	Observation	EU-FORA fellow reply
ES	risk	-	-	-	-
