# Supplementary material for: Food Risk Analysis: Towards a Better Understanding of „Hazard” and „Risk” in EU food legislation
Source: Preprints.org preprint supplement (doi:10.20944/preprints202306.1556.v1), 2023-06-21
Supplement: Supplementary file 10 [file ET.xlsx]

## Sheet: REG 178-2002
Old version
Language	Term	Location (doc page)	English	Translation	Observation	EU-FORA fellow reply
ET	hazard	2	(10) Experience has shown that it is necessary to adopt measures aimed at guaranteeing that unsafe food is not placed on the market and at ensuring that systems exist to identify and respond to food safety problems in order to ensure the proper functioning of the internal market and to protect human health. Similar issues relating to feed safety should be addressed.	(10) Kogemused on näidanud, et on vaja võtta vastu meetmed tagamaks, et ohtlikku toitu ei viida turule, ning tagamaks, et on olemas süsteemid, mille abil saab kindlaks määrata ja lahendada toidu ohutusega seotud probleemid, et kindlustada siseturu nõuetekohane toimimine ja kaitsta inimeste tervist. Samalaadseid küsimusi tuleks käsitleda seoses sööda ohutusega.	Is "unsafe" translated as "hazardous" ("ohtlikku ")? Is the translation acceptable?
ET	hazard	3	(24) It is necessary to ensure that food and feed exported or re-exported from the Community complies with Community law or the requirements set up by the importing country. In other circumstances, food and feed can only be exported or re-exported if the importing country has expressly agreed. However, it is necessary to ensure that even where there is agreement of the importing country, food inj…	(24) On vaja tagada, et ühendusest eksporditav või reeksporditav toit ja sööt vastaksid ühenduse õiguse nõuetele või importivas riigis kehtivatele nõuetele. Muudel asjaoludel võib toitu ja sööta eksportida või reeksportida ainult importiva riigi selge nõusoleku korral. Siiski on vaja tagada, et ka importiva riigi nõusoleku korral ei ekspordita ega reekspordita tervistkahjustavat toitu ega ohtlikk…	Is "injurious" translated as "hazardous" ("ohtlikku")? Is the translation acceptable?
ET	hazard	9	In other circumstances, except in the case where foods are injurious to health or feeds are unsafe, food and feed can only be exported or re-exported if the competent authorities of the country of destination have expressly agreed, after having been fully informed of the reasons for which and the circumstances in which the food or feed concerned could not be placed on the market in the Community	Muudel asjaoludel, välja arvatud tervistkahjustava toidu või ohtliku sööda puhul, võib toitu ja sööta eksportida ja reeksportida ainult juhul, kui sihtriigi pädev asutus on andnud selge nõusoleku, olles enne saanud täieliku teabe põhjuste ja asjaolude kohta, mis ei võimaldanud asjaomast toitu või sööta ühenduse turule viia	Is "injurious" translated with the word expressing "hazard"("ohtliku")? Is the translation acceptable?
ET	hazard	10	6. Where any food which is unsafe is part of a batch, lot or consignment of food of the same class or description, it shall be presumed that all the food in that batch, lot or consignment is also unsafe, unless following a detailed assessment there is no evidence that the rest of the batch, lot or consignment is unsafe.	6. Kui ohtlik toit on sama tooteklassi või -liigi toidust koosneva partii või kaubasaadetise osa, siis eeldatakse, et kogu selle partii või kaubasaadetise toit on samuti ohtlik, välja arvatud juhul, kui üksikasjaliku hindamise järel puuduvad tõendid selle kohta, et ülejäänud osa toidupartiist või -saadetisest on ohtlik.	Is "unsafe" translated as "hazardous" ("ohtlik")? Is the translation acceptable?
ET	hazard	10	2. Feed shall be deemed to be unsafe for its intended use if it is considered to:	2. Sööt loetakse ohtlikuks kavandatud kasutuseks, kui see	Is "unsafe" translated with the word expressing "hazard"("ohtlikuks")? Is the translation acceptable?
ET	hazard	10	— make the food derived from food-producing animals unsafe for human consumption.	— muudab toiduloomadelt pärit toidu tarbimise inimestele ohtlikuks	Is "unsafe" translated with the word expressing "hazard"("ohtlikuks")? Is the translation acceptable?
ET	hazard	11	1. Feed shall not be placed on the market or fed to any food-producing animal if it is unsafe.	1. Sööta ei tohi turule viia ega anda toiduloomadele, kui see ei ole ohutu	Is "unsafe" translated as "hazardous" ("ohtlik")? Is the translation acceptable?
Language	Term	Location (doc page)	English	Translation	Observation	EU-FORA fellow reply
ET	risk	21	(b) any recommendation or agreement with professional operators which is aimed, on a voluntary or obligatory basis, at preventing, limiting or imposing specific conditions on the placing on the market or the eventual use of food or feed on account of a serious risk to human health requiring rapid action;	b) igast soovitusest või kutseliste käitlejatega sõlmitud kokkuleppest, mille eesmärk on vabatahtlikult või sunniviisiliselt takistada või piirata toidu või sööda turuleviimist või võimalikku kasutamist, või sellele eritingimusi seada, sest on olemas tõsine ht inimeste tervisele, mis nõuab kiiret tegutsemist;	Is "risk" translated as "hazard" ("oht") in "risk to human health"?
ET	risk	21	1. Information, available to the members of the network, relating to a risk to human health posed by food and feed shall in general be available to the public in accordance with the information principle provided for in Article 10. In general, the public shall have access to information on product identification, the nature of the risk and the measure taken.	1. Võrgustiku liikmetele kättesaadav teave toidust ja söödast tuleneva ohu kohta inimeste tervisele on avalikkusele üldjuhul kättesaadav artiklis 10 ettenähtud teatamispõhimõtte kohaselt. Üldiselt on üldsusel juurdepääs teab	Is "risk" translated as "hazard" ("oht") in "risk to human health"?
New version
Language	Term	Location (doc page)	English	Translation	Observation	EU-FORA fellow reply
ET	hazard	9	In other circumstances, except in the case where foods are injurious to health or feeds are unsafe, food and feed can only be exported or reexported if the competent authorities of the country of destination have expressly agreed, after having been fully informed of the reasons for which and the circumstances in which the food or feed concerned could not be placed on the market in the Community	Muudel asjaoludel, välja arvatud tervistkahjustava toidu või ohtliku sööda puhul, võib toitu ja sööta eksportida ja reeksportida ainult juhul, kui sihtriigi pädev asutus on andnud selge nõusoleku, olles enne saanud täieliku teabe põhjuste ja asjaolude kohta, mis ei võimaldanud asjaomast toitu või sööta ühenduse turule viia	Is "injurious" translated with the word espressing "hazard"("ohtliku")? Is the translation acceptable?
ET	hazard	11	6. Where any food which is unsafe is part of a batch, lot or consignment of food of the same class or description, it shall be presumed that all the food in that batch, lot or consignment is also unsafe, unless following a detailed assessment there is no evidence that the rest of the batch, lot or consignment is unsafe.	6. Kui ohtlik toit on sama tooteklassi või -liigi toidust koosneva partii või kaubasaadetise osa, siis eeldatakse, et kogu selle partii või kaubasaadetise toit on samuti ohtlik, välja arvatud juhul, kui üksikasjaliku hindamise järel puuduvad tõendid selle kohta, et ülejäänud osa toidupartiist või -saadetisest on ohtlik.	Is "unsafe" translated with the word espressing "hazard"("ohtlik")? Is the translation acceptable?
ET	hazard	11	1. Feed shall not be placed on the market or fed to any foodproducing animal if it is unsafe.	1. Sööta ei tohi turule viia ega anda toiduloomadele, kui see ei ole ohutu	Is "unsafe" translated with the word espressing "hazard"("ohtutu")? Is the translation acceptable?
ET	hazard	11	2. Feed shall be deemed to be unsafe for its intended use if it is considered to:	2. Sööt loetakse ohtlikuks kavandatud kasutuseks, kui see	Is "unsafe" translated with the word espressing "hazard"("ohtlikuks")? Is the translation acceptable?
ET	hazard	11	— make the food derived from food-producing animals unsafe for human consumption.	— muudab toiduloomadelt pärit toidu tarbimise inimestele ohtlikuks	Is "unsafe" translated with the word espressing "hazard"("ohtlikuks")? Is the translation acceptable?
Language	Term	Location (doc page)	English	Translation	Observation	EU-FORA fellow reply
ET	risk	-	-	-	-

## Sheet: REG 852-2004
Old version
Language	Term	Location (doc page)	English	Translation	Observation	EU-FORA fellow reply
ET	hazard	2	(17) The setting of objectives such as pathogen reduction targets or performance standards may guide the implementation of hygiene rules. It is therefore necessary to provide procedures for that purpose. Such objectives would supplement existing food law, such as Council Regulation (EEC) No 315/93 of 8 February 1993 laying down Community procedures for contaminants in food 1 , which provides for …	(17) Hügieenieeskirjade rakendamist võib juhtida selliste eesmärkide seadmisega, nagu näiteks patogeenide vähendamise sihtnormid või jõudlustasemed. Seetõttu on vaja luua vastavad menetlused. Sellised eesmärgid täiendaksid olemasolevaid toidualaseid õigusnorme, näiteks nõukogu 8. veebruari 1993. aasta määrus (EMÜ) nr 315/93, (1) milles on sätestatud ühenduse menetlused toidus sisalduvate saasteai…	Is "unsafe" translated with the word expressing "hazard" ("ohtliku")? Is the tranlsation acceptable?
ET	hazard	12	7. Food business operators are to keep and retain records relating to measures put in place to control hazards in an appropriate manner and for an appropriate period, commensurate with the nature and size of the food business. Food business operators are to make relevant information contained in these records available to the competent authority and receiving food business operators on request.	7. Toidukäitlejad peavad säilitama asjakohaste meetoditega ja vajaliku aja jooksul riskide ohjamiseks võetud meetmetega seotud andmeid vastavalt toidukäitlemisettevõtte laadile ja suurusele. Toidukäitlejad peavad tegema kõnealustes andmetes sisalduva asjaomase teabe kättesaadavaks pädevale asutusele ja taotluse korral vastuvõtvatele toidukäitlejatele	Is "hazards" translated as "risk" ("riskide") in "control hazards"?
ET	hazard	13	2. Guides to good hygiene practice should include appropriate information on hazards that may arise in primary production and associated operations and actions to control hazards, including relevant measures set out in Community and national legislation or national and Community programmes. Examples of such hazards and measures may include:	2. Suunised heade hügieenitavade kohta peaksid sisaldama asjakohast teavet esmatootmises ja seotud toimingutes tekkida võivate riskide kohta ja meetmeid nende ohjamiseks, sealhulgas ühenduse ja riiklikes õigusaktides või riiklikes ja ühenduse programmides sätestatud asjakohased meetmed. Selliste riskide ja meetmete hulka kuuluvad näiteks:	Is "hazards" translated as "risk" ("riskide") in "control hazards"?
ET	hazard	17	2. No person suffering from, or being a carrier of a disease likely to be transmitted through food or afflicted, for example, with infected wounds, skin infections, sores or diarrhoea is to be permitted to handle food or enter any food-handling area in any capacity if there is any likelihood of direct or indirect contamination. Any person so affected and employed in a food business and who is lik…	2. Ühtegi inimest, kes põeb sellist haigust või on sellise haiguse nakkuse kandja, mis võib levida toidu kaudu, näiteks infitseerunud haavad, nahahaigused, põletikud või kõhulahtisus, ei tohi lubada mingis ulatuses toitu käsitseda või siseneda toidukäitlemisalasse, kui on olemas mis tahes otsese või kaudse saastumise oht. Kõik nimetatud probleemidega toidutöötlemisettevõttes töötavad isikud, kes …	Is "any likelihood of direct or indirect contamination" translated with the word expressing "hazard" ("oht")? Is the translation acceptable? Should it be translated in another way?
Language	Term	Location (doc page)	English	Translation	Observation	EU-FORA fellow reply
ET	risk	14	8. Drainage facilities are to be adequate for the purpose intended. They are to be designed and constructed to avoid the risk of contamination. Where drainage channels are fully or partially open, they are to be so designed as to ensure that waste does not flow from a contaminated area towards or into a clean area, in particular an area where foods likely to present a high risk to the final consu…	8. Äravooluseadmed peavad olema piisavad ettenähtud otstarbel kasutamiseks. Need peavad olema konstrueeritud ja ehitatud eesmärgiga vältida toiduainete saastumise ohtu. Kui äravooluviimarid on täielikult või osaliselt avatud, peavad need olema konstrueeritud eesmärgiga vältida jääkide voolamist saastunud alast puhta ala poole, eriti alasse, kus käideldakse lõpptootjale suurima võimaliku ohuga toi…	Is "risk" translated as "hazard" ("ohtu") in "risk of contamination" and "risk to the final consumer"?
ET	risk	15	1. Premises and vending machines are, so far as is reasonably practicable, to be so sited, designed, constructed and kept clean and maintained in good repair and condition as to avoid the risk of contamination, in particular by animals and pests.	1. Ruumid ja müügiautomaadid paigaldatakse, projekteeritakse, ehitatakse ning hoitakse puhtad ja heas seisukorras nii, et oleks mõistlikult teostatavas ulatuses välditud toiduainete saastumise oht ning kahjurite levik.	Is "risk" translated as "hazard" ("ohtu") in "risk of contamination"?
ET	risk	16	(h) foodstuffs are to be so placed as to avoid the risk of contamination so far as is reasonably practicable.	h) toiduaineid tuleb hoida nii, et toidu saastumine oleks mõistlikult teostatavas ulatuses välditud	Is the word "risk" missing from the Estonian version? Is the translation acceptable?
ET	risk	16	5. Where conveyances and/or containers have been used for transporting anything other than foodstuffs or for transporting different foodstuffs, there is to be effective cleaning between loads to avoid the risk of contamination	5. Kui veokeid ja/või mahuteid on kasutatud lisaks toiduainetele muude kaupade veoks või kui nendega koos veetakse erinevaid toiduaineid, tuleb saastumise ohu vältimiseks neid vedude vahepeal tõhusalt puhastada.	Is "risk" translated as "hazard" ("ohu") in "risk of contamination"?
ET	risk	16	6. Foodstuffs in conveyances and/or containers are to be so placed and protected as to minimise the risk of contamination.	6. Toiduained peavad olema veokitel ja/või mahutites paigutatud ja kaitstud nii, et toiduainete saastumise oht oleks minimeeritud.	Is "risk" translated as "hazard" ("oht") in "risk of contamination"?
ET	risk	16	(a) be effectively cleaned and, where necessary, disinfected. Cleaning and disinfection are to take place at a frequency sufficient to avoid any risk of contamination;	a) tõhusalt puhastatud ja vajadusel desinfitseeritud. Puhastamine ja desinfitseerimine peab toimuma mis tahes saastumisohu vältimiseks piisava sagedusega;	Is "risk" translated as "hazard" ("saastumisohu ")" in "risk of contamination"?
ET	risk	16	(b) be so constructed, be of such materials and be kept in such good order, repair and condition as to minimise any risk of contamination;	b) nii ehitatud, sellistest materjalidest ning sellises seisukorras, et toidu saastumise oht oleks minimeeritud;	Is "risk" translated as "hazard" ("oht") in "risk of contamination"?
ET	risk	17	3. Recycled water used in processing or as an ingredient is not to present a risk of contamination. It is to be of the same standard as potable water, unless the competent authority is satisfied that the quality of the water cannot affect the wholesomeness of the foodstuff in its finished form.	3. Töötlemisel või koostisosana kasutatava ümbertöödeldud veega ei tohi kaasneda saastumise oht. Selline vesi peab vastama joogiveega samadele normidele, välja arvatud juhul, kui pädev asutus on seisukohal, et vee kvaliteet ei kahjusta valmis toiduaine tervislikkust.	Is "risk" translated as "hazard" ("oht") in "risk of contamination"?
ET	risk	18	5. Raw materials, ingredients, intermediate products and finished products likely to support the reproduction of pathogenic micro-organisms or the formation of toxins are not to be kept at temperatures that might result in a risk to health. The cold chain is not to be interrupted. However, limited periods outside temperature control are permitted, to accommodate the practicalities of handling dur…	5. Tooraineid, koostisaineid, vahetooteid ja lõpptooteid, milles võivad paljuneda patogeensed mikroobid või tekkida toksiinid, ei tohi hoida temperatuuril, mis võib põhjustada nende tõttu ohtu tervisele. Külmaahelat ei tohi katkestada. Siiski on lubatud ettenähtud temperatuurist kõrvalekaldumine piiratud ajaks, kui see on vajalik käitlemisest tulenevatel asjaoludel toidu ettevalmistamiseks, veoks…	Is "risk" translated as "hazard" ("ohtu") in "risk to health"?
ET	risk	18	6. Where foodstuffs are to be held or served at chilled temperatures they are to be cooled as quickly as possible following the heat-processing stage, or final preparation stage if no heat process is applied, to a temperature which does not result in a risk to health.	6. Jahutatuna serveeritav või hoitav toit tuleb kohe pärast kuumtöötlemise etappi või kui kuumtöötlemist ei kasutata pärast lõpliku ettevalmistamise etappi jahutada sellise temperatuurini, mis välistab ohu tervisele.	Is "risk" translated as "hazard" ("ohtu") in "risk to health"?
ET	risk	18	7. The thawing of foodstuffs is to be undertaken in such a way as to minimise the risk of growth of pathogenic microorganisms or the formation of toxins in the foods. During thawing, foods are to be subjected to temperatures that would not result in a risk to health. Where run-off liquid from the thawing process may present a risk to health it is to be adequately drained. Following thawing, food …	7. Toiduainete sulatamine peab toimuma selliselt, et oleks minimeeritud patogeensete mikroobide kasvu või toksiinide tekkimise oht toidus. Sulatamise ajal tuleb toiduaineid hoida temperatuuril, mis ei põhjusta nende tõtu ohtu tervisele. Kui sulatamisel tekkiv vedelik võib põhjustada ohtu tervisele, tuleb tagada selle asjakohane äravool. Pärast sulatamist tuleb toitu käsitseda nii, et patogeensete…	Is "risk" translated as "hazard" ("ohtu") in "risk to health"?
ET	risk	18	2. Wrapping materials are to be stored in such a manner that they are not exposed to a risk of contamination.	2. Ümbrisematerjale tuleb hoida kaitstuna saastumisohu eest	Is "risk" translated as "hazard" ("saastumisohu") in "risk of contamination"?
New version
Language	Term	Location (doc page)	English	Translation	Observation	EU-FORA fellow reply
ET	hazard	-	-	-	-	-
Language	Term	Location (doc page)	English	Translation	Observation	EU-FORA fellow reply
ET	risk	-	-	-	-	-

## Sheet: REG 853-2004
Old version
Language	Term	Location (doc page)	English	Translation	Observation	EU-FORA fellow reply
ET	hazard	3	(22) In order to ensure proper inspection of hunted wild game placed on the Community market, bodies of hunted animals and their viscera should be presented for official post-mortem inspection at a game-handling establishment. However, to preserve certain hunting traditions without prejudicing food safety, it is appropriate to provide for training for hunters who place wild game on the market for…	(22) Selleks, et kindlustada ühenduse turule viidavate kütitud looduslike ulukite nõuetekohane inspekteerimine, tuleks kütitud loomade kere ja sisikond esitada ametlikuks tapajärgseks kontrolliks ulukite töötlemisettevõttes. Teatavate küttimistraditsioonide säilitamiseks ilma toiduohutust ohtu seadmata võib siiski ka pakkuda koolitust küttidele, kes looduslikke ulukeid inimtoiduks turule viivad. …	Is "hazard" translated as "risks" ("ohte") in "no anomalies or hazards"?
Language	Term	Location (doc page)	English	Translation	Observation	EU-FORA fellow reply
ET	risk	22	9. When not skinned, porcine animals must have their bristles removed immediately. The risk of contamination of the meat with scalding water must be minimised. Only approved additives may be used for this operation. Porcine animals must be thoroughly rinsed afterwards with potable water.	9. Kui sigu ei nülita, siis tuleb neilt viivitamata harjased eemaldada. Tuleb minimeerida liha saastumine karvatustamisveega. Selleks toiminguks on lubatud kasutada üksnes tunnustatud lisandeid. Sead tuleb seejärel põhjalikult loputada joogiveega.	Is the word "risk" missing in the Estonian version? Is the translation acceptable?
ET	risk	30	2. The trained person must carry out an examination of the body, and of any viscera removed, to identify any characteristics that may indicate that the meat presents a health risk. The examination must take place as soon as possible after killing.	2. Koolitatud isik peab keret ja eemaldatud sisikonda kontrollima, et tuvastada võimalikke iseloomulikke jooni, mis võiksid viidata lihas peituvale terviseohule. Kontrollimine peab toimuma võimalikult kiiresti pärast tapmist.	Is "risk" translated as "hazard" ("terviseohule") in "health risk"?
ET	risk	31	1. The trained person must carry out an examination to identify any characteristics that may indicate that the meat presents a health risk. The examination must take place as soon as possible after killing.	1. Koolitatud isik peab keret kontrollima, et tuvastada võimalikke iseloomulikke jooni, mis võiksid viidata lihas peituvale terviseohule. Kontrollimine peab toimuma võimalikult kiiresti pärast tapmist.	Is "risk" translated as "hazard" ("terviseohule") in "health risk"?
ET	risk	47	(b) is stored in such a manner that it is not exposed to a risk of contamination;	b) on ladustatud saastumisohtu vältivalt;	Is "risk" translated as "hazard" ("saastumisohtu") in "risk of contamination"?
ET	risk	49	1. Milking equipment, and premises where milk is stored, handled or cooled must be located and constructed so as to limit the risk of contamination of milk.	1. Lüpsiseadmed ja ruumid, kus piima hoitakse, käsitsetakse või jahutatakse, peavad olema paigutatud ja ehitatud piima saastamisohtu maksimaalselt piiravalt.	Is "risk" translated as "hazard" ("saastumisohtu") in "risk of contamination"?
New version
Language	Term	Location (doc page)	English	Translation	Observation	EU-FORA fellow reply
ET	hazard	-	-	-	-
Language	Term	Location (doc page)	English	Translation	Observation	EU-FORA fellow reply
ET	risk	65	must ensure that the raw material or finished product undergo a freezing treatment in order to kill viable parasites that may be a risk to the health of the consumer.	tuleb tagada toorme või lõpptoote töötlemine külmutamise teel, et häviksid tarbijate tervisele ohtlikud eluvõimelised parasiidid.	Is "risk" translated as "hazard" ("ohtlikud") in "risk to health"?
ET	risk	68	Fresh, prepared, frozen and processed fishery products belonging to the family Gempylidae, in particular Ruvettus pretiosus and Lepidocybium flavobrunneum, may only be placed on the market in wrapped/packaged form and must be appropriately labelled to provide information to the consumer on preparation/cooking methods and on the risk related to the presence of substances with adverse gastrointesti…	Sugukonda Gempylidae kuuluvat värsket, valmis, külmutatud või töödeldud kala, eriti kalaliike Ruvettus pretiosus ja Lepidocybium flavobrunneum, võib turustada ainult pakendatult/pakitult ja asjakohaselt märgistatult, teavitamaks tarbijat selle valmistamise/kuumtöötlemise meetoditest ja ohust, et toode võib sisaldada mao- ja sooletegevusele ebasoodsalt mõjuvaid ühendeid	Is "risk" translated as "hazard" ("ohust") in "risk related"?
ET	risk	68	(b) is stored in such a manner that it is not exposed to a risk of contamination;	b) on ladustatud saastumisohtu vältivalt;	Is "risk" translated as "hazard" ("saastumisohtu") in "risk of contamination"?
ET	risk	71	1. Milking equipment and premises where milk and colostrum are stored, handled or cooled must be located and constructed so as to limit the risk of contamination of milk and colostrum.	1. Lüpsiseadmed ja ruumid, kus piima ja ternespiima hoitakse, käideldakse või jahutatakse, peavad olema paigutatud ja ehitatud nii, et maksimaalselt vältida piima ja ternespiima saastumist.	Is "risk" missing in the Estonian version? Is the translation acceptable?
ET	risk	82	All precautions, including safe disposal of animal by-products, waste, unused or surplus material, shall be taken to avoid risks of spreading diseases to animals.	Võetakse kõik ettevaatusabinõud, mis muu hulgas hõlmavad loomsete kõrvalsaaduste, jäätmete, kasutamata materjali ja ülejääkide ohutut kõrvaldamist, et hoida ära haiguste loomadele levimise ohtu.	Is "risk" translated as "hazard" ("ohtu") in "avoid risks"?
ET	risk	85	All precautions, including safe disposal of animal by-products, waste, unused or surplus material, shall be taken to avoid risks of spreading diseases to animals	Võetakse kõik ettevaatusabinõud, mis muu hulgas hõlmavad loomsete kõrvalsaaduste, jäätmete, kasutamata materjali ja ülejääkide ohutut kõrvaldamist, et hoida ära haiguste loomadele levimise ohtu.	Is "risk" translated as "hazard" ("ohtu") in "avoid risks"?

## Sheet: REG 625-2017
Old version
Language	Term	Location (doc page)	English	Translation	Observation	EU-FORA fellow reply
ET	hazard	2	(6) Transmissible animal diseases, including by micro-organisms that have developed resistance to antimicrobials, may have a significant impact on public health, food and feed safety, and animal health and welfare. In order to ensure high standards of animal and public health in the Union, rules on animal health measures and on feed and food safety are laid down at Union level. Compliance with th…	(6) Loomataudidel, sealhulgas antimikroobikumide suhtes resistentsuse omandanud mikroorganismide põhjustatud loomataudidel võib olla märkimisväärne mõju rahvatervisele, toidu- ja söödaohutusele ning loomade tervisele ja heaolule. Selleks et tagada liidus looma- ja rahvatervise kõrged standardid, on liidu tasandil sätestatud normid loomatervise meetmete ning toidu- ja söödaohutuse kohta. Nende nor…	Is "threats" translated using the word for "hazard" ("ohtude")? Should there be a differentiation between threat and hazard?
ET	hazard	115	5. The hazards in the production, processing and distribution of animals and goods	5. Loomade ja kaupade tootmise, töötlemise ja turustamisega seotud ohud	Is the word "hazard" missing from the Estonian version? Is the translation acceptable?
Language	Term	Location (doc page)	English	Translation	Observation	EU-FORA fellow reply
ET	risk	-	-	-	-	-
New version
Language	Term	Location (doc page)	English	Translation	Observation	EU-FORA fellow reply
ET	hazard	136	5. The hazards in the production, processing and distribution of animals and goods	5. Loomade ja kaupade tootmise, töötlemise ja turustamisega seotud ohud	Is the word "hazard" missing from the Estonian version? Is the translation acceptable?
Language	Term	Location (doc page)	English	Translation	Observation	EU-FORA fellow reply
ET	risk	-	-	-	-	-

## Sheet: REG 1381-2019
Single version
Language	Term	Location (doc page)	English	Translation	Observation	EU-FORA fellow reply
ET	hazard	4	(24) There are certain public concerns about the Authority's assessment in the area of authorisation procedures being primarily based on industry studies. It is of utmost importance that the Authority carry out searches in scientific literature to be able to consider other data and studies existing on the subject matter submitted to its assessment. In order to provide an additional level of guara…	(24) Üldsus näeb teatavaid probleeme selles, et loamenetluste puhul põhineb ameti hindamine peamiselt tööstuse tehtud uuringutel. On väga oluline, et amet teeks teabeotsinguid teaduskirjanduse põhjal, et tal oleks võimalik hindamiseseme puhul võtta arvesse muid olemasolevaid andmeid ja uuringuid. Selleks et sätestada täiendavad tagatised, millega tagada, et amet saab juurdepääsu kõigile loataotlu…	Is "risk" translated as "hazard" ("oht")?
ET	hazard	5	(28) It is therefore necessary to strengthen the transparency of the risk assessment in a proactive manner. All scientific data and information supporting requests for authorisations or for approvals under Union law as well as other requests for scientific output should be made publicly available in a proactive manner and be easily accessible as early as possible in the risk assessment process. H…	(28) Seepärast on vaja ennetavalt suurendada riski hindamise läbipaistvust. Kõik teadusandmed ja teave, mis toetavad liidu õiguse kohaseid loataotlusi või heakskiidu taotlusi ja muid teadusväljunditaotlusi, tuleks teha riskihindamisprotsessis võimalikult vara üldsusele ennetavalt kättesaadavaks hõlpsasti juurdepääsetaval viisil. Selline avalikustamine ei tohiks siiski piirata intellektuaalomandiõ…	Is " without jeopardising the proactive character of disclosure to the public and the easy public access to the disclosed data and information." correctly translated? Was the word for hazard ("oht") used for translating the syntagm containing "jeopardising"?
Language	Term	Location (doc page)	English	Translation	Observation	EU-FORA fellow reply
ET	risk	2	(10) The general plan on risk communication should identify the key factors to be taken into account when considering the type and level of risk communication activities needed, such as the different levels of risk, the nature of the risk and its potential impact on human health, animal health and, where relevant, the environment, who and what are directly or indirectly affected by the risk, the …	(10) Riskiteavituse üldkavas tuleks määratleda kesksed tegurid, mida tuleb arvesse võtta vajaliku riskiteavitusmeetme tüübi ja taseme kavandamisel, näiteks erinevad riskitasemed, riski laad ja selle võimalik mõju inimeste ja loomade tervisele ning asjakohasel juhul keskkonnale, see, keda ja mida risk otseselt või kaudselt mõjutab, ohuga kokkupuutumise tasemed, erakorralisuse määr ning riskikontro…	Is the part including "the levels of exposure to a hazard" translated correcty in the estonian version? Does the translation refer to risk and not hazard?
ET	risk	3	(19) Authorisation procedures are based on the principle that it is for the applicant or the notifier to prove that the subject matter of an application or notification complies with Union requirements. That principle is based on the premise that human health, animal health and, where relevant, the environment are better protected where the burden of proof is on the applicant or the notifier sinc…	(19) Loa andmise korra alus on põhimõte, et taotleja peab temale kättesaadavate teaduslike teadmiste alusel tõendama, et taotluse ese vastab liidu nõuetele. Selle põhimõtte alus on eeldus, et inimeste ja loomade tervist, ning asjakohasel juhul keskkonda, kaitstakse paremini, kui tõendamiskoormis lasub taotlejal, kuna ta peab tõendama enne turule laskmist, et taotluse ese on ohutu, selle asemel, e…	Is the translation correct? Was "unsafe" translated using a word related more to hazard "ohtlikkust"?
ET	risk	4	(24) There are certain public concerns about the Authority's assessment in the area of authorisation procedures being primarily based on industry studies. It is of utmost importance that the Authority carry out searches in scientific literature to be able to consider other data and studies existing on the subject matter submitted to its assessment. In order to provide an additional level of guara…	(24) Üldsus näeb teatavaid probleeme selles, et loamenetluste puhul põhineb ameti hindamine peamiselt tööstuse tehtud uuringutel. On väga oluline, et amet teeks teabeotsinguid teaduskirjanduse põhjal, et tal oleks võimalik hindamiseseme puhul võtta arvesse muid olemasolevaid andmeid ja uuringuid. Selleks et sätestada täiendavad tagatised, millega tagada, et amet saab juurdepääsu kõigile loataotlu…	Is the part including "Where there is a risk that the results of a public consultation cannot be given proper consideration because of the applicable deadlines, it is appropriate to provide for a limited extension of those deadlines." translated correcty in the estonian version? Was the word for hazard ("oht" used instead of risk?
