# Supplementary material for: Food Risk Analysis: Towards a Better Understanding of „Hazard” and „Risk” in EU food legislation
Source: Preprints.org preprint supplement (doi:10.20944/preprints202306.1556.v1), 2023-06-21
Supplement: Supplementary file 11 [file FI.xlsx]

## Sheet: REG 178-2002
Old version
Language	Term	Location (doc page)	English	Translation	Observation	EFSA Focal Point
FI	hazard	3	(10) Experience has shown that it is necessary to adopt measures aimed at guaranteeing that unsafe food is not placed on the market and at ensuring that systems exist to identify and respond to food safety problems in order to ensure the proper functioning of the internal market and to protect human health. Similar issues relating to feed safety should be addressed.	(10) Kokemus on osoittanut, että on tarpeen toteuttaa toimenpiteitä, joilla pyritään takaamaan, että markkinoilla ei ole vaarallisia elintarvikkeita, ja varmistamaan, että on järjestelmiä, joiden avulla havaitaan elintarvikkeiden turvallisuuteen liittyvät ongelmat ja reagoidaan niihin sisämarkkinoiden toimivuuden varmistamiseksi ja ihmisten terveyden suojelemiseksi. Samoja kysymyksiä olisi käsite…	Is the translation correct? Is "jeoperdised" translated with the word for "hazard" ("vaarallisia")? Is the translation acceptable?
FI	hazard	3	(24) It is necessary to ensure that food and feed exported or re-exported from the Community complies with Community law or the requirements set up by the importing country. In other circumstances, food and feed can only be exported or re-exported if the importing country has expressly agreed. However, it is necessary to ensure that even where there is agreement of the importing country, food inj…	(24) Yhteisöstä vietävien tai jälleenvietävien elintarvikkeiden ja rehujen osalta on varmistettava, että ne ovat yhteisön lainsäädännön tai tuovan maan vaatimusten mukaisia. Muussa tapauksessa elintarvikkeita ja rehuja voi viedä tai jälleenviedä ainoastaan edellyttäen, että tuova maa on antanut siihen nimenomaisen suostumuksensa. Myös siinä tapauksessa, että tuova maa on antanut suostumuksensa, o…	Is "injurious" translated as "hazardous" ("vaarallisia") in "injurious to health"?
Language	Term	Location (doc page)	English	Translation	Observation	EFSA Focal Point
FI	risk	-	-	-	-	-
New version
Language	Term	Location (doc page)	English	Translation	Observation	EFSA Focal Point
FI	hazard	25	2. The Authority shall consult stakeholders and the public on the basis of the non-confidential version of the application or notification made public by the Authority in accordance with Articles 38 to 39e, and immediately after such disclosure to the public, in order to identify whether other relevant scientific data or studies are available on the subject matter concerned by the application or …	2. Elintarviketurvallisuusviranomainen kuulee sidosryhmiä ja kansalaisia hakemuksen tai ilmoituksen ei-luottamuksellisen version perusteella, jonka elintarviketurvallisuusviranomainen on julkistanut 38–39 e artiklan mukaisesti, ja välittömästi tällaisen julkistamisen tapahduttua, sen kartoittamiseksi, onko hakemuksen tai ilmoituksen kohteesta saatavilla muita olennaisia tieteellisiä tietoja tai t…	Is "risk" translated as "hazard" ("vaarana") in "risk assessment"?
Language	Term	Location (doc page)	English	Translation	Observation	EFSA Focal Point
FI	risk	-	-	-	-	-

## Sheet: REG 852-2004
Old version
Language	Term	Location (doc page)	English	Translation	Observation	EFSA Focal Point
FI	hazard	-	-	-	-	-
Language	Term	Location (doc page)	English	Translation	Observation	EFSA Focal Point
FI	risk	44	1. Premises and vending machines are, so far as is reasonably practicable, to be so sited, designed, constructed and kept clean and maintained in good repair and condition as to avoid the risk of contamination, in particular by animals and pests.	1. Tilat sekä myyntiautomaatit on, niin hyvin kuin käytännössä on mahdollista, sijoitettava, suunniteltava, rakennettava, pidettävä puhtaina ja kunnossa siten, että vältetään saastuminen, erityisesti eläinten ja tuhoeläinten aiheuttama.	Is "risk of contamination" translated as "contamnation avoidance" ("vältetään saastuminen )? Is the translation acceptable?
FI	risk	52	2. Wrapping materials are to be stored in such a manner that they are not exposed to a risk of contamination.	2. Kääremateriaalit on säilytettävä siten, etteivät ne ole vaarassa saastua.	Is "risk" translated as "hazard" ("vaarassa saastua")? Is the translation acceptable?
New version
Language	Term	Location (doc page)	English	Translation	Observation	EFSA Focal Point
FI	hazard	-	-	-	-	-
Language	Term	Location (doc page)	English	Translation	Observation	EFSA Focal Point
FI	risk	19	1. Premises and vending machines are, so far as is reasonably practicable, to be so sited, designed, constructed and kept clean and maintained in good repair and condition as to avoid the risk of contamination, in particular by animals and pests.	1. Tilat sekä myyntiautomaatit on, niin hyvin kuin käytännössä on mahdollista, sijoitettava, suunniteltava, rakennettava, pidettävä puhtaina ja kunnossa siten, että vältetään saastuminen, erityisesti eläinten ja tuhoeläinten aiheuttama.	Is "risk of contamination" translated as "contamnation avoidance" ("vältetään saastuminen ")? Is the translation acceptable?
FI	risk	24	2. Wrapping materials are to be stored in such a manner that they are not exposed to a risk of contamination.	2. Kääremateriaalit on säilytettävä siten, etteivät ne ole vaarassa saastua.	Is "risk" translated as "hazard" ("vaarassa saastua ") in "risk of contamination"? Is the translation acceptable?

## Sheet: REG 853-2004
Old version
Language	Term	Location (doc page)	English	Translation	Observation	EFSA Focal Point
FI	hazard	28	8) to specify criteria for determining when epidemiological data indicate that a fishing ground does not present a health hazard with regard to the presence of parasites and, consequently, for determining when the competent authority may authorise food business operators not to freeze fishery products in accordance with Annex III, Section VIII, Chapter III, Part D;	8. perusteiden määrittelemistä sen määrittämiseksi, milloin epidemiologisen tiedon mukaan pyyntialue ei ole terveysuhka loisten osalta, ja näin ollen sen määrittämiseksi, milloin toimivaltainen viranomainen voi antaa elintarvikealan toimijalle luvan olla pakastamatta kalastustuotteita liitteen III VIII jakson III luvun D osan mukaisesti;	Is "hazard" translated as "threat" ("terveysuhka")? Should it be a differentiation between threat and hazard?
FI	hazard	43	6. Where fish are headed and/or gutted on board, such operations must be carried out hygienically as soon as possible after capture, and the products must be washed immediately and thoroughly with potable water or clean water. In that event, the viscera and parts that may constitute a danger to public health must be removed as soon as possible and kept apart from products intended for human consu…	6. Silloin kun kaloilta poistetaan pää ja/tai sisälmykset aluksella, nämä toimenpiteet on toteutettava hygieenisesti mahdollisimman pian pyynnin jälkeen ja tuotteet on pestävä välittömästi ja läpikotaisin juomakelpoisella vedellä tai puhtaalla vedellä. Tällöin sisälmykset ja osat, joista saattaa aiheutua vaaraa kansanterveydelle, on vietävä pois niiden läheisyydestä mahdollisimman pian ja pidettä…	Is "danger" translated as "hazard" ("vaaraa")? Should it be a differentiation between danger and hazard?
FI	hazard	114	(a) epidemiological data are available indicating that the fishing grounds of origin do not present a health hazard with regard to the presence of parasites; and	a) on olemassa epidemiologista tietoa, jonka perusteella alkuperäinen pyyntialue ei ole terveysuhka loisten osalta,	Is "hazard" translated as "threat" ("terveysuhka")? Should it be a differentiation between threat and hazard?
Language	Term	Location (doc page)	English	Translation	Observation	EFSA Focal Point
FI	risk	76	2. The trained person must carry out an examination of the body, and of any viscera removed, to identify any characteristics that may indicate that the meat presents a health risk. The examination must take place as soon as possible after killing.	2. Koulutetun henkilön on suoritettava ruhon ja poistettujen sisäelinten tarkastus sellaisten ominaisuuksien havaitsemiksi , joiden perusteella lihan voidaan todeta olevan terveydelle vaarallista. Tarkastus on suoritettava mahdollisimman pian tappamisen jälkeen.	Is "risk" translated as "hazard" ("vaarallista") in "health risk"?
FI	risk	78	1. The trained person must carry out an examination to identify any characteristics that may indicate that the meat presents a health risk. The examination must take place as soon as possible after killing.	1. Koulutetun henkilön on suoritettava tarkastus sellaisten ominaisuuksien havaitsemiksi, joiden perusteella lihan voidaan todeta olevan terveydelle vaarallista. Tarkastus on suoritettava mahdollisimman pian tappamisen jälkeen.	Is "risk" translated as "hazard" ("vaarallista") in "health risk"?
FI	risk	123	1. Milking equipment, and premises where milk is stored, handled or cooled must be located and constructed so as to limit the risk of contamination of milk.	1. Lypsylaitteiston ja maidon säilytykseen, käsittelyyn tai jäähdytykseen käytettävien tilojen sijainnin ja rakenteiden on oltava sellaiset, että maidon saastumisvaara on rajoite	Is "risk" translated as "hazard" ("saastumisvaara") in "risk of contamination"?
FI	risk	145	(a) all ruminant bone material derived from animals born, reared or slaughtered in countries or regions classified as having a low incidence of BSE in accordance with Community legislation is subjected to a process which ensures that all bone material is finely crushed and degreased with hot water and treated with dilute hydrochloric acid (at minimum concentration of 4% and pH < 1.5) over a perio…	a) kaikelle märehtijöiden luuaineelle, joka on saatu yhteisön lainsäädännön mukaisesti pieniriskisessä BSE-maassa tai pieniriskisellä BSE-alueella syntyneistä, kasvatetuista tai teurastetuista eläimistä, tehdään käsittely, jossa luuaine murskataan hienoksi, siitä poistetaan rasva kuumalla vedellä ja se käsitellään laimennetulla suolahapolla (vähimmäispitoisuus 4 prosenttia ja pH < 1,5) vähintään …	Is "low incidence of BSE " translated as "BSE-risk" ("pieniriskisellä BSE-alueella")? Is the translation acceptable?
New version
Language	Term	Location (doc page)	English	Translation	Observation	EFSA Focal Point
FI	hazard	11	(i) the criteria for determining when epidemiological data indicate that a fishing ground does not present a health hazard with regard to the presence of parasites and, consequently, for determining when the competent authority may authorise food business operators not to freeze fishery products in accordance with Annex III, Section VIII, Chapter III, Part D;	i) perusteita sen määrittämiseksi, milloin epidemiologisen tiedon mukaan pyyntialue ei ole terveysuhka loisten osalta, ja näin ollen sen määrittämiseksi, milloin toimivaltainen viranomainen voi antaa elintarvikealan toimijalle luvan olla pakastamatta kalastustuotteita liitteessä III olevan VIII jakson III luvun D osan mukaisesti;	Is "hazard" translated as "threat" ("terveysuhka") in "health hazard?
FI	hazard	63	6. Where fish are headed and/or gutted on board, such operations must be carried out hygienically as soon as possible after capture, and the fishery products must be washed immediately. The viscera and parts that may constitute a danger to public health must be removed as soon as possible and kept apart from fishery products intended for human consumption. Livers and roes intended for human consu…	6. Silloin kun kaloilta poistetaan pää ja/tai sisälmykset aluksella, nämä toimenpiteet on toteutettava hygieenisesti mahdollisimman pian pyynnin jälkeen ja kalastustuotteet on pestävä välittömästi. Sisälmykset ja osat, joista saattaa aiheutua vaaraa kansanterveydelle, on vietävä pois niiden läheisyydestä mahdollisimman pian ja pidettävä erillään ihmisravinnoksi tarkoitetuista kalastustuotteista. …	Is "danger" translated as "hazard" ("vaaraa")? Should it be a differentiation between danger and hazard?
Language	Term	Location (doc page)	English	Translation	Observation	EFSA Focal Point
FI	risk	42	2. The trained person must carry out an examination of the body, and of any viscera removed, to identify any characteristics that may indicate that the meat presents a health risk. The examination must take place as soon as possible after killing	2. Koulutetun henkilön on suoritettava eläimen ja poistettujen sisäelinten tarkastus sellaisten ominaisuuksien havaitsemiseksi, joiden perusteella lihan voidaan todeta olevan terveydelle vaarallista. Tarkastus on suoritettava mahdollisimman pian tappamisen jälkeen	Is "risk" translated as "hazard" ("vaarallista") in "health risk"?
FI	risk	44	1. The trained person must carry out an examination to identify any characteristics that may indicate that the meat presents a health risk. The examination must take place as soon as possible after killing.	1. Koulutetun henkilön on suoritettava tarkastus sellaisten ominaisuuksien havaitsemiksi, joiden perusteella lihan voidaan todeta olevan terveydelle vaarallista. Tarkastus on suoritettava mahdollisimman pian tappamisen jälkeen.	Is "risk" translated as "hazard" ("vaarallista") in "health risk"?
FI	risk	71	1. Milking equipment and premises where milk and colostrum are stored, handled or cooled must be located and constructed so as to limit the risk of contamination of milk and colostrum.	1. Lypsylaitteiston sekä maidon ja ternimaidon säilytykseen, käsittelyyn tai jäähdytykseen käytettävien tilojen sijainnin ja rakenteiden on oltava sellaiset, että maidon ja ternimaidon saastumisvaara on rajoitettu	Is "risk" translated as "hazard" ("saastumisvaara") in "risk of contamination"?

## Sheet: REG 625-2017
Old version
Language	Term	Location (doc page)	English	Translation	Observation	EFSA Focal Point
FI	hazard	5	(31) The competent authorities should ensure that the staff responsible for official controls does not disclose information acquired during the performance of those controls where that information is covered by professional secrecy. Unless there is an overriding interest to justify disclosure, professional secrecy should include information which would undermine the purpose of inspections, invest…	(31) Toimivaltaisten viranomaisten olisi varmistettava, että virallisesta valvonnasta vastaava henkilöstö ei paljasta valvontaa suorittaessaan saamiaan tietoja silloin, jos kyseiset tiedot kuuluvat salassapitovelvollisuuden piiriin. Jollei tietojen julkistamista oikeuta jokin erittäin tärkeä etu, sellaisten tietojen, jotka voisivat vaarantaa tarkastusten, tutkimusten tai auditointien tarkoituksen…	Is anything described using a word close to the word hazard ("vaarantaa")?
FI	hazard	29	(d) an assessment of procedures on good manufacturing practices, good hygiene practices, good farming practices, and of procedures based on the principles of hazard analysis critical control points (HACCP);	d) hyviä tuotantotapoja, hyviä hygieniakäytäntöjä ja hyviä maatalouskäytäntöjä koskevien menettelyjen sekä vaarojen arvioinnin ja kriittisten hallintapisteiden järjestelmän (hazard analysis critical control points, HACCP) periaatteisiin perustuvien menettelyiden arviointi;	They sometime use the EN version to express "hazard analysis and critical control points".
Language	Term	Location (doc page)	English	Translation	Observation	EFSA Focal Point
FI	risk	72	(b) the mechanisms and technical arrangements to ensure the issuance of accurate and reliable official certificates, and prevent risk of fraud;	b) mekanismit ja tekniset järjestelyt, joilla varmistetaan oikeellisten ja luotettavien virallisten todistusten myöntäminen ja estetään mahdolliset petokset;	Is the word "risk" missing from the Finnish versionin " prevent risk of fraud" ? Is the translation acceptable?
New version
Language	Term	Location (doc page)	English	Translation	Observation	EFSA Focal Point
FI	hazard	-	-	-	-	-
Language	Term	Location (doc page)	English	Translation	Observation	EFSA Focal Point
FI	risk	72	(b) the mechanisms and technical arrangements to ensure the issuance of accurate and reliable official certificates, and prevent risk of fraud;	b) mekanismit ja tekniset järjestelyt, joilla varmistetaan oikeellisten ja luotettavien virallisten todistusten myöntäminen ja estetään mahdolliset petokset;	Is the word "risk" missing from the Finnish translation?Is the translation acceptable?

## Sheet: REG 1381-2019
Single version
Language	Term	Location (doc page)	English	Translation	Observation	EFSA Focal Point
FI	hazard	5	(28) It is therefore necessary to strengthen the transparency of the risk assessment in a proactive manner. All scientific data and information supporting requests for authorisations or for approvals under Union law as well as other requests for scientific output should be made publicly available in a proactive manner and be easily accessible as early as possible in the risk assessment process. H…	(28) Sen vuoksi on tarpeen parantaa ennakoivasti riskinarvioinnin avoimuutta. Kaikki tieteelliset tiedot, joita esitetään unionin lainsäädännön nojalla tehtäviä l hyväksyntää koskevia hakemuksia ja tieteellisiä selvityksiä koskevien pyyntöjen tueksi, olisi asetettava julkisesti saataville ennakoivasti ja niiden olisi oltava helposti saatavilla riskinarviointiprosessin mahdollisimman varhaisessa v…	Is " without jeopardising the proactive character of disclosure to the public and the easy public access to the disclosed data and information." correctly translated? Was the word for hazard ("vaara") used for translatingthe syntagm containing "jeopardising"?
Language	Term	Location (doc page)	English	Translation	Observation	EFSA Focal Point
FI	risk	4	(24) There are certain public concerns about the Authority's assessment in the area of authorisation procedures being primarily based on industry studies. It is of utmost importance that the Authority carry out searches in scientific literature to be able to consider other data and studies existing on the subject matter submitted to its assessment. In order to provide an additional level of guara…	(24) Elintarviketurvallisuusviranomaisen suorittama arviointi aiheuttaa tiettyä huolta aloilla, joilla lupien myöntämismenettely perustuu ensisijaisesti teollisuuden toimittamiin tutkimuksiin. On äärimmäisen tärkeää, että elintarviketurvallisuusviranomainen tutkii tieteellisiä julkaisuja voidakseen ottaa huomioon muita tietoja ja tutkimuksia, joita on olemassa sen arvioitavaksi toimitetusta kohte…	Is the part including "Where there is a risk that the results of a public consultation cannot be given proper consideration because of the applicable deadlines, it is appropriate to provide for a limited extension of those deadlines." translated correcty in the finnish version? Does the translation refer to hazard ("vaarana") and not risk?
		12	2. The Authority shall consult stakeholders and the public on the basis of the non-confidential version of the application or notification made public by the Authority in accordance with Articles 38 to 39e, and immediately after such disclosure to the public, in order to identify whether other relevant scientific data or studies are available on the subject matter concerned by the application or …	2. Elintarviketurvallisuusviranomainen kuulee sidosryhmiä ja kansalaisia hakemuksen tai ilmoituksen eiluottamuksellisen version perusteella, jonka elintarviketurvallisuusviranomainen on julkistanut 38–39 e artiklan mukaisesti, ja välittömästi tällaisen julkistamisen tapahduttua, sen kartoittamiseksi, onko hakemuksen tai ilmoituksen kohteesta saatavilla muita olennaisia tieteellisiä tietoja tai tu…	Is the part including "In duly justified cases, where there is a risk that the results of the public consultation performed in accordance with this paragraph cannot be given proper consideration because of the applicable time limits within which the Authority is required to deliver its scientific output, those time limits may be extended for a maximum period of seven weeks." translated correcty? …
