# Supplementary material for: Food Risk Analysis: Towards a Better Understanding of „Hazard” and „Risk” in EU food legislation
Source: Preprints.org preprint supplement (doi:10.20944/preprints202306.1556.v1), 2023-06-21
Supplement: Supplementary file 12 [file FR.xlsx]

## Sheet: REG 178-2002
Old version
Language	Term	Location (doc page)	English	Translation	Observation	EU-FORA fellow reply
FR	hazard	2	(10) Experience has shown that the functioning of the internal market in food or feed can be jeopardised where it is impossible to trace food and feed. It is therefore necessary to establish a comprehensive system of traceability within food and feed businesses so that targeted and accurate withdrawals can be undertaken or information given to consumers or control officials, thereby avoiding the …	(10) L'expérience a montré qu'il est nécessaire d'adopter des mesures visant à garantir que des denrées alimentaires dangereuses ne soient pas mises sur le marché et qu'il existe des systèmes permettant d'identifier les problèmes de sécurité des denrées alimentaires et d'y faire face, dans le but d'assurer le bon fonctionnement du marché intérieur et de protéger la santé humaine. Il conviendrait …	Is "jeoperdised" translated with the word for "hazard" ("dangereuse")? Is the translation acceptable?
FR	hazard	3	(24) It is necessary to ensure that food and feed exported or re-exported from the Community complies with Community law or the requirements set up by the importing country. In other circumstances, food and feed can only be exported or re-exported if the importing country has expressly agreed. However, it is necessary to ensure that even where there is agreement of the importing country, food inj…	(24) Il convient de garantir que les exportations et les réexportations depuis la Communauté de denrées alimentaires et d'aliments pour animaux soient conformes à la législation communautaire ou aux exigences fixées par le pays importateur; autrement, les denrées alimentaires et les aliments pour animaux ne peuvent être exportés ou réexportés qu'avec l'accord exprès du pays importateur; il convie…	Is "unsafe" translated as "hazardous" (dangereux")? Is the translation acceptable?
FR	hazard	9	In other circumstances, except in the case where foods are injurious to health or feeds are unsafe, food and feed can only be exported or re-exported if the competent authorities of the country of destination have expressly agreed, after having been fully informed of the reasons for which and the circumstances in which the food or feed concerned could not be placed on the market in the Community.	Dans les autres cas, sauf lorsque les denrées alimentaires sont préjudiciables à la santé ou lorsque les aliments pour animaux sont dangereux, les denrées alimentaires et les aliments pour animaux ne peuvent être exportés ou réexportés qu'avec l'accord exprès des autorités compétentes du pays de destination, après qu'elles ont été dûment informées des raisons pour lesquelles et des circonstances …	Is "injurious" translated with the word espressing "hazard"("dangereux")?Is the translation acceptable?
FR	hazard	10	1. Food shall not be placed on the market if it is unsafe	1. Aucune denrée alimentaire n'est mise sur le marché si elle est dangereuse.	Is "unsafe" translated with the word espressing "hazard"("dangereuse")? Is the translation acceptable?
FR	hazard	10	(a) injurious to health	a) préjudiciable à la santé;	Is "injurious" translated as g "damaging"("préjudiciable")? Is this appropriate? Previously "injurious" was translated with the word expressing hazard ("dangereux").
FR	hazard	10	3. In determining whether any food is unsafe, regard shall be had	3. Pour déterminer si une denrée alimentaire est dangereuse, il est tenu compte:	Is "unsafe" translated with the word expressing "hazard"("dangereuse")? Is the translation acceptable?
FR	hazard	10	6. Where any food which is unsafe is part of a batch, lot or consignment of food of the same class or description, it shall be presumed that all the food in that batch, lot or consignment is also unsafe, unless following a detailed assessment there is no evidence that the rest of the batch, lot or consignment is unsafe.	6. Lorsqu'une denrée alimentaire dangereuse fait partie d'un lot ou d'un chargement de denrées alimentaires de la même catégorie ou correspondant à la même description, il est présumé que la totalité des denrées alimentaires de ce lot ou chargement sont également dangereuses, sauf si une évaluation détaillée montre qu'il n'y a pas de preuve que le reste du lot ou du chargement soit dangereux	Is "unsafe" translated with the word expressing "hazard"("dangereuse/dangereux")? IIs the translation acceptable?
FR	hazard	10	8. Conformity of a food with specific provisions applicable to that food shall not bar the competent authorities from taking appropriate measures to impose restrictions on it being placed on the market or to require its withdrawal from the market where there are reasons to suspect that, despite such conformity, the food is unsafe.	8. La conformité d'une denrée alimentaire à des dispositions spécifiques applicables à cette denrée n'interdit pas aux autorités compétentes de prendre des mesures appropriées pour imposer des restrictions à sa mise sur le marché ou pour exiger son retrait du marché s'il existe des raisons de soupçonner que, malgré cette conformité, cette denrée alimentaire est dangereuse.	Is "unsafe" translated with the word expressing "hazard"("dangereuse")? Is the translation acceptable?
FR	hazard	10	1. Feed shall not be placed on the market or fed to any food producing animal if it is unsafe.	1. Aucun aliment pour animaux n'est mis sur le marché ou donné à des animaux producteurs de denrées alimentaires s'il est dangereux.	Is "unsafe" translated with the word expressing "hazard"("dangereux")? Is the translation acceptable?
FR	hazard	10	2. Feed shall be deemed to be unsafe for its intended use if it is considered to:	2. Un aliment pour animaux est dit dangereux compte tenu de l'utilisation prévue s'il est considéré qu'il:	Is "unsafe" translated with the word expressing "hazard"("dangereux")? Is the translation acceptable?
FR	hazard	10	— make the food derived from food-producing animals unsafe for human consumption.	— rend dangereuses pour la consommation humaine les denrées alimentaires dérivées des animaux producteurs de denrées alimentaires.	Is "unsafe" translated with the word espressing "hazard"("dangereuses")? Is the translation acceptable?
FR	hazard	11	3. Where a feed which has been identified as not satisfying the feed safety requirement is part of a batch, lot or consignment of feed of the same class or description, it shall be presumed that all of the feed in that batch, lot or consignment is so affected, unless following a detailed assessment there is no evidence that the rest of the batch, lot or consignment fails to satisfy the feed safet…	3. Lorsqu'un aliment pour animaux, identifié comme ne satisfaisant pas aux prescriptions en matière de sécurité des aliments pour animaux, fait partie d'un lot ou d'un chargement d'aliments pour animaux de la même catégorie ou correspondant à la même description, il est présumé que la totalité des aliments pour animaux de ce lot ou chargement sont également dangereux, sauf si une évaluation détai…	Is "unsafe" translated with the word expressing "hazard"("dangereux")?Is the translation acceptable?
FR	hazard	11	5. Conformity of a feed with specific provisions applicable to that feed shall not bar the competent authorities from taking appropriate measures to impose restrictions on it being placed on the market or to require its withdrawal from the market where there are reasons to suspect that, despite such conformity, the feed is unsafe.	5. La conformité d'un aliment pour animaux à des dispositions spécifiques applicables à cet aliment n'interdit pas aux autorités compétentes de prendre des mesures appropriées pour imposer des restrictions à sa mise sur le marché ou pour exiger son retrait du marché s'il existe des raisons de soupçonner que, malgré cette conformité, cet aliment pour animaux est dangereux	Is "unsafe" translated with the word expressing "hazard"("dangereux")? Is the translation acceptable?
FR	hazard	15	(f) the Panel on biological hazards;	f) le groupe sur les risques biologiques;	Is "hazards" translated as "risks" ("risques") in "biologival hazards"?
Language	Term	Location (doc page)	English	Translation	Observation	EU-FORA fellow reply
FR	risk	3	(26) Some Member States have adopted horizontal legislation on food safety imposing, in particular, a general obligation on economic operators to market only food that is safe. However, these Member States apply different basic criteria for establishing whether a food is safe. Given these different approaches, and in the absence of horizontal legislation in other Member States, barriers to trade …	(26) Certains États membres ont adopté une législation horizontale en matière de sécurité des denrées alimentaires qui impose, en particulier, aux opérateurs économiques une obligation générale de mettre uniquement sur le marché des denrées alimentaires sûres. Cependant, ces États membres appliquent des critères de base différents pour déterminer si une denrée alimentaire est sûre. Ces approches …	Is there any addition in the French version that includes the word for "risk" ("risquent")? Is the translation acceptable?
New version
Language	Term	Location (doc page)	English	Translation	Observation	EU-FORA fellow reply
FR	hazard	9	In other circumstances, except in the case where foods are injurious to health or feeds are unsafe, food and feed can only be exported or reexported if the competent authorities of the country of destination have expressly agreed, after having been fully informed of the reasons for which and the circumstances in which the food or feed concerned could not be placed on the market in the Community.	Dans les autres cas, sauf lorsque les denrées alimentaires sont préjudiciables à la santé ou lorsque les aliments pour animaux sont dangereux, les denrées alimentaires et les aliments pour animaux ne peuvent être exportés ou réexportés qu'avec l'accord exprès des autorités compétentes du pays de destination, après qu'elles ont été dûment informées des raisons pour lesquelles et des circonstances …	Is "injurious" translated with the word espressing "hazard"("dangereux")? Is this appropriate?
FR	hazard	10	1. Food shall not be placed on the market if it is unsafe	1. Aucune denrée alimentaire n'est mise sur le marché si elle est dangereuse.	Is "unsafe" translated with the word espressing "hazard"("dangereuse")? Is this appropriate?
FR	hazard	10	2. Food shall be deemed to be unsafe if it is considered to be:	2. Une denrée alimentaire est dite dangereuse si elle est considérée comme:	Is "unsafe" translated with the word espressing "hazard"("dangereuse")? Is this appropriate?
FR	hazard	10	3. In determining whether any food is unsafe, regard shall be had	3. Pour déterminer si une denrée alimentaire est dangereuse, il est tenu compte:	Is "unsafe" translated with the word espressing "hazard"("dangereuse")? Is this appropriate?
FR	hazard	11	6. Where any food which is unsafe is part of a batch, lot or consignment of food of the same class or description, it shall be presumed that all the food in that batch, lot or consignment is also unsafe, unless following a detailed assessment there is no evidence that the rest of the batch, lot or consignment is unsafe.	6. Lorsqu'une denrée alimentaire dangereuse fait partie d'un lot ou d'un chargement de denrées alimentaires de la même catégorie ou correspondant à la même description, il est présumé que la totalité des denrées alimentaires de ce lot ou chargement sont également dangereuses, sauf si une évaluation détaillée montre qu'il n'y a pas de preuve que le reste du lot ou du chargement soit dangereux	Is "unsafe" translated with the word espressing "hazard"("dangereuse/dangereux")? Is this appropriate?
FR	hazard	11	8. Conformity of a food with specific provisions applicable to that food shall not bar the competent authorities from taking appropriate measures to impose restrictions on it being placed on the market or to require its withdrawal from the market where there are reasons to suspect that, despite such conformity, the food is unsafe.	8. La conformité d'une denrée alimentaire à des dispositions spécifiques applicables à cette denrée n'interdit pas aux autorités compétentes de prendre des mesures appropriées pour imposer des restrictions à sa mise sur le marché ou pour exiger son retrait du marché s'il existe des raisons de soupçonner que, malgré cette conformité, cette denrée alimentaire est dangereuse.	Is "unsafe" translated with the word expressing "hazard"("dangereuse")? Is the translation acceptable?
FR	hazard	11	1. Food shall not be placed on the market if it is unsafe.	1. Aucune denrée alimentaire n'est mise sur le marché si elle est dangereuse.	Is "unsafe" translated with the word expressing "hazard"("dangereux")? Is the translation acceptable?
FR	hazard	11	2. Food shall be deemed to be unsafe if it is considered to be:	2. Une denrée alimentaire est dite dangereuse si elle est considérée comme:	Is "unsafe" translated with the word expressing "hazard"("dangereux")? Is the translation acceptable?
FR	hazard	11	— make the food derived from food-producing animals unsafe for human consumption.	— rend dangereuses pour la consommation humaine les denrées alimentaires dérivées des animaux producteurs de denrées alimentaires	Is "unsafe" translated with the word espressing "hazard"("dangereuses")? Is this appropriate?
FR	hazard	11	3. Where a feed which has been identified as not satisfying the feed safety requirement is part of a batch, lot or consignment of feed of the same class or description, it shall be presumed that all of the feed in that batch, lot or consignment is so affected, unless following a detailed assessment there is no evidence that the rest of the batch, lot or consignment fails to satisfy the feed safet…	3. Lorsqu'un aliment pour animaux, identifié comme ne satisfaisant pas aux prescriptions en matière de sécurité des aliments pour animaux, fait partie d'un lot ou d'un chargement d'aliments pour animaux de la même catégorie ou correspondant à la même description, il est présumé que la totalité des aliments pour animaux de ce lot ou chargement sont également dangereux, sauf si une évaluation détai…	Is "unsafe" translated with the word espressing "hazard"("dangereux")? Is the translation acceptable?
FR	hazard	11	5. Conformity of a feed with specific provisions applicable to that feed shall not bar the competent authorities from taking appropriate measures to impose restrictions on it being placed on the market or to require its withdrawal from the market where there are reasons to suspect that, despite such conformity, the feed is unsafe.	5. La conformité d'un aliment pour animaux à des dispositions spécifiques applicables à cet aliment n'interdit pas aux autorités compétentes de prendre des mesures appropriées pour imposer des restrictions à sa mise sur le marché ou pour exiger son retrait du marché s'il existe des raisons de soupçonner que, malgré cette conformité, cet aliment pour animaux est dangereux	Is "unsafe" translated with the word expressing "hazard"("dangereux")? Is the translation acceptable?
Language	Term	Location (doc page)	English	Translation	Observation	EU-FORA fellow reply
FR	risk	-	-	-	-	-

## Sheet: REG 852-2004
Old version
Language	Term	Location (doc page)	English	Translation	Observation	EU-FORA fellow reply
FR	hazard	4	(11) The application of hazard analysis and critical control point (HACCP) principles to primary production is not yet generally feasible. However, guides to good practice should encourage the use of appropriate hygiene practices at farm level. Where necessary, specific hygiene rules for primary production should supplement these guides. It is appropriate for the hygiene requirements applicable t…	(11) L'application générale des principes de l'analyse des risques et de la maîtrise des points critiques (HACCP) à la production primaire n'est pas encore possible. Toutefois, des guides de bonnes pratiques devraient encourager le recours à des pratiques d'hygiène appropriées dans les exploitations. En cas de besoin, des règles spécifiques d'hygiène pour la production primaire devraient compléte…	Is "hazard" translated as "risk" ("l'analyse des risques") in Observationhazard analysis"
FR	hazard	15	Hazard analysis and critical control points	Analyse des risques et maîtrise des points critiques	Is "hazard" trasnlated as "risk" ("Analyse des risques") in "hazard analysis"?
FR	hazard	26	(c) explain the reasons for the adaptation, including, where relevant, by providing a summary of the hazard analysis carried out and any measures to be taken to ensure that the adaptation will not compromise the objectives of this Regulation;	c) explique les motifs de l'adaptation (y compris, le cas échéant, en fournissant une synthèse de l'analyse des risques réalisée et en indiquant toute mesure devant être prise pour faire en sorte que l'adaptation ne compromette pas les objectifs du présent règlement),	Is "hazard" trasnlated as "risk" "risk analysis" ("l'analyse des risques") in "hazard analysis"?
FR	hazard	51	3. At all stages of production, processing and distribution, food is to be protected against any contamination likely to render the food unfit for human consumption, injurious to health or contaminated in such a way that it would be unreasonable to expect it to be consumed in that state.	3. À toutes les étapes de la production, de la transformation et de la distribution, les denrées alimentaires doivent être protégées contre toute contamination susceptible de les rendre impropres à la consommation humaine, dangereuses pour la santé ou contaminées de manière telle qu'elles ne pourraient être raisonnablement considérées comme pouvant être consommées en l'état	Is "injurious" translated as "hazardous" in ("dangereuses pur la santé") in "injurious to health"?
Language	Term	Location (doc page)	English	Translation	Observation	EU-FORA fellow reply
	risk	44	1. Premises and vending machines are, so far as is reasonably practicable, to be so sited, designed, constructed and kept clean and maintained in good repair and condition as to avoid the risk of contamination, in particular by animals and pests	1. Les sites et les distributeurs automatiques doivent, autant que faire se peut, être installés, conçus, construits, nettoyés et entretenus de manière à éviter la contamination, en particulier par des animaux et parasites.	Is "risk of contamination" translated as "avoidance of contamination" ("viter la contamination")? Is the translation acceptable? Should it be translated "risque de contaminación directa o indirecta" or in another way?
FR	risk	50	2. No person suffering from, or being a carrier of a disease likely to be transmitted through food or afflicted, for example, with infected wounds, skin infections, sores or diarrhoea is to be permitted to handle food or enter any food-handling area in any capacity if there is any likelihood of direct or indirect contamination. Any person so affected and employed in a food business and who is lik…	2. Aucune personne atteinte d'une maladie susceptible d'être transmise par les aliments ou porteuse d'une telle maladie, ou souffrant, par exemple, de plaies infectées, d'infections ou lésions cutanées ou de diarrhée ne doit être autorisée à manipuler les denrées alimentaires et à pénétrer dans une zone de manutention de denrées alimentaires, à quelque titre que ce soit, lorsqu'il existe un risqu…	Is "likelihood of direct and indirect contamination" translated as "risk of direct and indirect contamination" ("un risque de contamination directe ou indirecte des aliments")? IIs the translation acceptable? Should it be translated " probabilidad de de contaminación directa o indirecta" or in another way??
New version
Language	Term	Location (doc page)	English	Translation	Observation	EU-FORA fellow reply
FR	hazard	11	(c) explain the reasons for the adaptation, including, where relevant, by providing a summary of the hazard analysis carried out and any measures to be taken to ensure that the adaptation will not compromise the objectives of this Regulation;	c) explique les motifs de l'adaptation (y compris, le cas échéant, en fournissant une synthèse de l'analyse des risques réalisée et en indiquant toute mesure devant être prise pour faire en sorte que l'adaptation ne compromette pas les objectifs du présent règlement),	Is "hazard" translated as "risk" ("l'analyse des risques") in "hazard analysis"?
Language	Term	Location (doc page)	English	Translation	Observation	EU-FORA fellow reply
FR	risk	22	2. No person suffering from, or being a carrier of a disease likely to be transmitted through food or afflicted, for example, with infected wounds, skin infections, sores or diarrhoea is to be permitted to handle food or enter any food-handling area in any capacity if there is any likelihood of direct or indirect contamination. Any person so affected and employed in a food business and who is lik…	2. Aucune personne atteinte d'une maladie susceptible d'être transmise par les aliments ou porteuse d'une telle maladie, ou souffrant, par exemple, de plaies infectées, d'infections ou lésions cutanées ou de diarrhée ne doit être autorisée à manipuler les denrées alimentaires et à pénétrer dans une zone de manutention de denrées alimentaires, à quelque titre que ce soit, lorsqu'il existe un risqu…	Is "likelihood of direct and indirect contamination" translated as "risk of direct and indirect contamination" ("un risque de contamination directe ou indirecte des aliments")? Is it acceptable? Should it be translated " probabilidad de de contaminación directa o indirecta" or in another way?

## Sheet: REG 853-2004
Old version
Language	Term	Location (doc page)	English	Translation	Observation	EU-FORA fellow reply
FR	hazard	3	(7) The requirement in Regulation (EC) No /2004 ∗ whereby food business operators carrying out any stage of production, processing and distribution of food after primary production and associated operations must put in place, implement and maintain procedures based on hazard analysis and critical control point (HACCP) principles also permits simplification	(7) L'obligation faite par le règlement (CE) n° …/2004 * aux exploitants du secteur alimentaire opérant à n'importe quel stade de la chaîne de production, de transformation et de distribution de denrées alimentaires après la production primaire et les opérations connexes de mettre en place, d'appliquer et de maintenir des procédures basées sur l'analyse des risques et la maîtrise des points criti…	Is "hazard" translated as "risks" ("risques") in "hazard analysis?
FR	hazard	8	(22) In order to ensure proper inspection of hunted wild game placed on the Community market, bodies of hunted animals and their viscera should be presented for official post-mortem inspection at a game-handling establishment. However, to preserve certain hunting traditions without prejudicing food safety, it is appropriate to provide for training for hunters who place wild game on the market for…	(22) En vue d'assurer une inspection adéquate du gibier sauvage mis sur le marché de la Communauté, le corps des animaux chassés et leurs viscères devraient être présentés en vue d'une inspection officielle post mortem dans un établissement de traitement du gibier. Néanmoins, en vue de préserver certaines traditions de chasse sans nuire à la sécurité des aliments, il convient de prévoir une forma…	Is "hazard" translated as "risk" ("risques") in "anomalies or hazards"?
FR	hazard	25	(c) explain the reasons for the adaptation, including, where relevant, by providing a summary of the hazard analysis carried out and any measures to be taken to ensure that the adaptation will not compromise the objectives of this Regulation; and	c) explique les motifs de l'adaptation, y compris, le cas échéant, en fournissant une synthèse de l'analyse des risques réalisée et en indiquant toute mesure devant être prise pour faire en sorte que l'adaptation ne compromette pas la réalisation des objectifs alimentaires du présent règlement; et	Is "hazard" translated as "risks" ("risques") in "hazard analysis?
FR	hazard	28	8) to specify criteria for determining when epidemiological data indicate that a fishing ground does not present a health hazard with regard to the presence of parasites and, consequently, for determining when the competent authority may authorise food business operators not to freeze fishery products in accordance with Annex III, Section VIII, Chapter III, Part D;	8) spécifier des critères permettant de déterminer le moment où les données épidémiologiques indiquent qu'un lieu de pêche ne présente pas un risque pour la santé eu égard à la présence de parasites et, dès lors, où l'autorité compétente peut autoriser les exploitants du secteur alimentaire à ne pas congeler les produits de la pêche conformément à l'annexe III, section VIII, chapitre III, partie …	Is "hazard" translated as "risk" ("risque")?
FR	hazard	43	1. Food business operators operating slaughterhouses must ensure that the procedures that they have put in place in accordance with the general requirements of Article 5 of Regulation (EC) No …/2004 ∗ meet the requirements that the hazard analysis shows to be necessary and the specific requirements listed in paragraph 2.	1. Les exploitants du secteur alimentaire gérant des abattoirs doivent s'assurer que les procédures qu'ils ont mises en place conformément aux exigences générales prévues à l'article 5 du règlement (CE) n°…/2004 * respectent les exigences dont l'analyse des risques fait apparaître la nécessité et les exigences spécifiques énoncées au paragraphe 2.	Is "hazard" translated as "risk" ("risque")?
FR	hazard	108	6. Where fish are headed and/or gutted on board, such operations must be carried out hygienically as soon as possible after capture, and the products must be washed immediately and thoroughly with potable water or clean water. In that event, the viscera and parts that may constitute a danger to public health must be removed as soon as possible and kept apart from products intended for human consu…	6. Lorsque les poissons sont étêtés et/ou éviscérés à bord, ces opérations doivent être effectuées de manière hygiénique et dès que possible après la capture, et les produits doivent être lavés immédiatement et abondamment à l'eau potable ou à l'eau propre. Dans ce cas, les viscères et les parties pouvant constituer un danger pour la santé publique doivent être retirés au plus vite et être conser…	Is "danger" translated using the word for "hazard" ("danger")? Should there be a differentiation between danger and hazard?
FR	hazard	116	E. TOXINS HARMFUL TO HUMAN HEALTH	E. TOXINES DANGEREUSES POUR LA SANTÉ HUMAINE	Is "harmful" translated as ""hazardous" ("dangereuses")? Is the translation acceptable?
FR	hazard	134	5. After breaking, each particle of the egg product must undergo processing as quickly as possible to eliminate microbiological hazards or to reduce them to an acceptable level. A batch that has been insufficiently processed may immediately undergo processing again in the same establishment, if this processing renders it fit for human consumption. When a batch is found to be unfit for human consu…	5. Après cassage, l'ovoproduit doit être intégralement soumis, aussi rapidement que possible, à une transformation visant à éliminer les risques microbiologiques ou à les ramener à un niveau acceptable. Un lot dont la transformation a été insuffisante peut être soumis sans délai à une nouvelle transformation dans le même établissement, à condition que cette transformation le rende propre à la con…	Is "hazards" translated as "risks" ("risques") in "microbiological hazards"?
Language	Term	Location (doc page)	English	Translation	Observation	EU-FORA fellow reply
FR	risk	105	2. Holds must be separated from the engine compartments and from the crew quarters by partitions which are sufficient to prevent any contamination of the stored fishery products. Holds and containers used for the storage of fishery products must ensure their preservation under satisfactory conditions of hygiene and, where necessary, ensure that melt water does not remain in contact with the produ…	2. Les cales doivent être séparées du compartiment machine et des locaux réservés à l'équipage par des cloisons permettant d'écarter tout risque de contamination des produits de la pêche entreposés. Les récipients utilisés pour l'entreposage des produits de la pêche doivent pouvoir assurer la conservation de ceux-ci dans des conditions d'hygiène satisfaisantes et, le cas échéant, permettre un éco…	Is the word "risk" ("risque") used for expressing "any contamination" in the French version? Is the translation acceptable?
FR	risk	144	(b) The storage rooms must be kept in a satisfactory state of cleanliness and repair, so that they do not constitute a source of contamination for the raw materials.	b) les locaux d'entreposage doivent être maintenus en bon état d'entretien et de propreté, de façon à ne pas risquer de contaminer les matières premières;	Is the word "risk" ("risquer") used for expressing "they do not consititute a source of contamination" in the French version? Is the translation correct?
FR	risk	148	(b) The storage rooms must be kept in a satisfactory state of cleanliness and repair, so that they do not constitute a source of contamination for the raw materials.	b) les locaux d'entreposage doivent être maintenus en bon état d'entretien et de propreté, de façon à ne pas risquer de contaminer les matières premières;	Is the word "risk" ("risquer") used for expressing "they do not consititute a source of contamination" in the French version? Is the translation acceptable?
New version
Language	Term	Location (doc page)	English	Translation	Observation	EU-FORA fellow reply
FR	hazard	11	(i) the criteria for determining when epidemiological data indicate that a fishing ground does not present a health hazard with regard to the presence of parasites and, consequently, for determining when the competent authority may authorise food business operators not to freeze fishery products in accordance with Annex III, Section VIII, Chapter III, Part D;	i) les critères permettant de déterminer le moment où les données épidémiologiques indiquent qu’un lieu de pêche ne présente pas un risque pour la santé eu égard à la présence de parasites et, dès lors, où l’autorité compétente peut autoriser les exploitants du secteur alimentaire à ne pas congeler les produits de la pêche conformément à l’annexe III, section VIII, chapitre III, partie D;	Is "hazard" translated as "risk" ("risque") in "health hazard"?
FR	hazard	63	6. Where fish are headed and/or gutted on board, such operations must be carried out hygienically as soon as possible after capture, and the fishery products must be washed immediately. The viscera and parts that may constitute a danger to public health must be removed as soon as possible and kept apart from fishery products intended for human consumption. Livers and roes intended for human consu…	6. Lorsque les poissons sont étêtés et/ou éviscérés à bord, ces opérations doivent être effectuées de manière hygiénique et dès que possible après la capture, et les produits de la pêche doivent être lavés immédiatement. Les viscères et les parties pouvant constituer un danger pour la santé publique doivent être retirés au plus vite et être conservés à l’écart des produits de la pêche destinés à …	Is "danger" translated using the word for "hazard" ("danger")? Should there be a differentiation between danger and hazard?
FR	hazard	66	(d) derived from fish farming, cultured from embryos and have been fed exclusively on a diet that cannot contain viable parasites that present a health hazard, and one of the following requirements is complied with:	d) provenant de la pisciculture, élevés à partir d’embryons et exclusivement soumis à un régime alimentaire exempt de parasites viables susceptibles de présenter un risque sanitaire, et qui satisfont à une des exigences suivantes:	Is "hazard" translated as "risk" ("risque") in "health hazard"?
FR	hazard	66	(ii) the food business operator verifies through procedures, approved by the competent authority, that the fishery products do not represent a health hazard with regard to the presence of viable parasites.	ii) l’exploitant du secteur alimentaire vérifie, au moyen de procédures approuvées par les autorités compétentes, que les produits de la pêche ne présentent pas de risque sanitaire au regard de la présence de parasites viables.	Is "hazard" translated as "risk" ("risque") in "health hazard"?
FR	hazard	66	(b) Before placing on the market fishery products referred to in points 3(c) and (d) which have not undergone the freezing treatment or which are not intended to undergo before consumption a treatment that kills viable parasites that present a health hazard, a food business operator must ensure that the fishery products originate from a fishing ground or fish farming which complies with the speci…	b) Avant de mettre sur le marché les produits de la pêche visés aux points 3 c) et d) qui n’ont pas été soumis au traitement de congélation ou ne sont pas destinés à être soumis avant consommation à un traitement tuant les parasites viables présentant un risque sanitaire, un exploitant du secteur alimentaire doit veiller à ce que ces produits proviennent de lieux de pêche ou d’élevage satisfaisan…	Is "hazard" translated as "risk" ("risque") in "health hazard"?
FR	hazard	116	E. TOXINS HARMFUL TO HUMAN HEALTH	E. TOXINES DANGEREUSES POUR LA SANTÉ HUMAINE	Is "harmful" translated as ""hazardous" ("dangereuses")? Is the translation acceptable?
Language	Term	Location (doc page)	English	Translation	Observation	EU-FORA fellow reply
FR	risk	53	(c) immerse live bivalve molluscs in seawater at the relaying area for an appropriate period, fixed depending on the water temperature, which period must be of at least two months' duration unless the competent authority agrees to a shorter period on the basis of the food business operator's risk analysis;	c) immerger les mollusques bivalves vivants dans l'eau de mer à l'intérieur de la zone de reparcage pendant une durée appropriée, fixée en fonction de la température de l'eau, cette période devant être de deux mois au minimum, sauf si l'autorité compétente autorise une période plus courte sur la base de l'►C4 analyse des dangers ◄ effectuée par l'exploitant du secteur alimentaire	Is "risk" translated as "hazard" ("danger") in "risk analysis"?
FR	risk	61	2. Holds must be separated from the engine compartments and from the crew quarters by partitions which are sufficient to prevent any contamination of the stored fishery products. Holds and containers used for the storage of fishery products must ensure their preservation under satisfactory conditions of hygiene and, where necessary, ensure that melt water does not remain in contact with the produ…	2. Les cales doivent être séparées du compartiment machine et des locaux réservés à l'équipage par des cloisons permettant d'écarter tout risque de contamination des produits de la pêche entreposés. Les récipients utilisés pour l'entreposage des produits de la pêche doivent pouvoir assurer la conservation de ceux-ci dans des conditions d'hygiène satisfaisantes et, le cas échéant, permettre un éco…	Is the word "risk" ("risque") used for expressing "any comtamination" in the French version? Is the translation acceptable?
FR	risk	71	(d) the identification of animals undergoing medical treatment likely to transfer residues to the milk and colostrum, and that milk and colostrum obtained from such animals before the end of the prescribed withdrawal period are not used for human consumption; and	d) que les animaux soumis à un traitement qui risque de faire passer des résidus médicamenteux dans le lait et le colostrum soient identifiés et que le lait et le colostrum provenant de ces animaux avant la fin du délai d'attente prescrit ne soient pas utilisés pour la consommation humaine;	Is the word "risk" ("risque") used for expressing "likely to transfer" in the French version? Is the translation acceptable?
FR	risk	82	(b) The storage rooms must be kept in a satisfactory state of cleanliness and repair, so that they do not constitute a source of contamination for the raw materials	b) les locaux d'entreposage doivent être maintenus en bon état d'entretien et de propreté, de façon à ne pas risquer de contaminer les matières premières;	Is the word "risk" ("risque") used for expressing "do not constitute a source of contamination" in the French version?Is the translation acceptable?
FR	risk	85	(b) The storage rooms must be kept in a satisfactory state of cleanliness and repair, so that they do not constitute a source of contamination for the raw materials.	b) les locaux d'entreposage doivent être maintenus en bon état d'entretien et de propreté, de façon à ne pas risquer de contaminer les matières premières;	Is the word "risk" ("risquer") used for expressing "they do not consititute a source of contamination" in the French version? Is the translation acceptable?

## Sheet: REG 625-2017
Old version
Language	Term	Location (doc page)	English	Translation	Observation	EU-FORA fellow reply
FR	hazard	-	-	-	-	-
Language	Term	Location (doc page)	English	Translation	Observation	EU-FORA fellow reply
FR	risk	100	viii) the secretariat of the Cartagena Protocol on Biosafety to the Convention on Biological Biodiversity;	viii) le secrétariat du protocole de Cartagena sur la prévention des risques biotechnologiques relatif à la convention sur la diversité biologique;	Is there an addition ("sur la prévention des risques biotechnologiques relatif") to the French version? Should it be translated as "biosafety" be translated "biosécurité" or in another way?
New version
Language	Term	Location (doc page)	English	Translation	Observation	EU-FORA fellow reply
FR	hazard	-	-	-	-	-
Language	Term	Location (doc page)	English	Translation	Observation	EU-FORA fellow reply
FR	risk	100	viii) the secretariat of the Cartagena Protocol on Biosafety to the Convention on Biological Biodiversity;	viii) le secrétariat du protocole de Cartagena sur la prévention des risques biotechnologiques relatif à la convention sur la diversité biologique;	Is there an addition to the French version ? Should "biosafety" be translated "biosécurité" or in another way? Is this translation acceptable?

## Sheet: REG 1381-2019
Single version
Language	Term	Location (doc page)	English	Translation	Observation	EU-FORA fellow reply
FR	hazard	-	-	-	-	-
Language	Term	Location (doc page)	English	Translation	Observation	EU-FORA fellow reply
FR	risk	-	-	-	-	-
