# Supplementary material for: Food Risk Analysis: Towards a Better Understanding of „Hazard” and „Risk” in EU food legislation
Source: Preprints.org preprint supplement (doi:10.20944/preprints202306.1556.v1), 2023-06-21
Supplement: Supplementary file 14 [file HR.xlsx]

## Sheet: REG 178-2002
Old version
Language	Term	Location (doc page)	English	Translation	Observation	EFSA Focal Point
HR	hazard	5	59) A system for rapid alert already exists in the framework of Council Directive 92/59/EEC of 29 June 1992 on general product safety (1). The scope of the existing system includes food and industrial products but not feed. Recent food crises have demonstrated the need to set up an improved and broadened rapid alert system covering food and feed. This revised system should be managed by the Commi…	(59) Sustav brzog uzbunjivanja već postoji u okviru Direktive Vijeća 92/59/EEZ od 29. lipnja 1992. o općoj sigurnosti proizvoda (1). Opseg postojećeg sustava uključuje hranu i industrijske proizvode, ali ne i hranu za životinje. Krize hrane u posljednje su vrijeme ukazale na potrebu uspostavljanja naprednog i proširenog sustava brzog uzbunjivanja koji obuhvaća hranu i hranu za životinje. Ovim izm…	Is "emergency" translated as "hazard" ("opasnosti") in "radiological emergency"? Is the translation acceptable?
Language	Term	Location (doc page)	English	Translation	Observation	EFSA Focal Point
HR	risk	-	-	-	-	-
New version
Language	Term	Location (doc page)	English	Translation	Observation	EFSA Focal Point
HR	hazard	-	-	-	-	-
Language	Term	Location (doc page)	English	Translation	Observation	EFSA Focal Point
HR	risk	-	-	-	-	-

## Sheet: REG 852-2004
Old version
Language	Term	Location (doc page)	English	Translation	Observation	EFSA Focal Point
HR	hazard	-	-	-	-	-
Language	Term	Location (doc page)	English	Translation	Observation	EFSA Focal Point
HR	risk	14	8. Drainage facilities are to be adequate for the purpose intended. They are to be designed and constructed to avoid the risk of contamination. Where drainage channels are fully or partially open, they are to be so designed as to ensure that waste does not flow from a contaminated area towards or into a clean area, in particular an area where foods likely to present a high risk to the final consu…	8. Sustavi za odvod otpadnih voda moraju odgovarati svrsi kojoj su namijenjeni. Moraju biti tako projektirani i izgrađeni da se izbjegne opasnost od kontaminacije. Ako su odvodni kanali u cijelosti ili djelomično otvoreni, moraju biti tako projektirani da se osigura da voda ne teče iz kontaminiranog područja prema čistom području ili u čisto područje, pogotovo u područje u kojemu se rukuje hranom…	Is "risk" translated as "hazard" ("opasnost") in "risk of contamination"?
HR	risk	15	1. Premises and vending machines are, so far as is reasonably practicable, to be so sited, designed, constructed and kept clean and maintained in good repair and condition as to avoid the risk of contamination, in particular by animals and pests.	1. Prostorije i automati za prodaju moraju, koliko god je to izvedivo, biti tako smješteni, izgrađeni, čišćeni i održavani da se spriječi opasnost od kontaminacije, posebno putem životinja ili štetnika.	Is "risk" translated as "hazard" ("opasnost") in "risk of contamination"?
HR	risk	15	(h) foodstuffs are to be so placed as to avoid the risk of contamination so far as is reasonably practicable	(h) hrana mora biti smještena tako da se izbjegne opasnost od kontaminacije koliko god je to izvedivo.	Is "risk" translated as "hazard" ("opasnost") in "risk of contamination"?
HR	risk	15	5. Where conveyances and/or containers have been used for transporting anything other than foodstuffs or for transporting different foodstuffs, there is to be effective cleaning between loads to avoid the risk of contamination.	5. Ako se prijevozna sredstva i/ili spremnici upotrebljavaju za prijevoz bilo čega drugoga osim hrane ili za prijevoz različite hrane, oni se moraju temeljito očistiti između pojedinih utovara/istovara kako bi se izbjegla opasnost od kontaminacije.	Is "risk" translated as "hazard" ("opasnost") in "risk of contamination"?
HR	risk	16	6. Foodstuffs in conveyances and/or containers are to be so placed and protected as to minimise the risk of contamination.	6. Hrana u prijevoznim sredstvima i/ili spremnicima mora biti tako smještena i zaštićena da je opasnost od kontaminacije minimalna.	Is "risk" translated as "hazard" ("opasnost") in "risk of contamination"?
HR	risk	16	(a) be effectively cleaned and, where necessary, disinfected. Cleaning and disinfection are to take place at a frequency sufficient to avoid any risk of contamination;	(a) biti učinkovito očišćeni i, prema potrebi, dezinficirani. Čišćenje i dezinfekcija moraju se obavljati dovoljno često da se izbjegne svaka opasnost od kontaminacije;	Is "risk" translated as "hazard" ("opasnost") in "risk of contamination"?
HR	risk	16	(b) be so constructed, be of such materials and be kept in such good order, repair and condition as to minimise any risk of contamination;	(b) biti tako izrađeni, od takvog materijala i održavani u tako dobrom stanju da se opasnost od kontaminacije smanji na najmanju mjeru;	Is "risk" translated as "hazard" ("opasnost") in "risk of contamination"?
HR	risk	17	3. Recycled water used in processing or as an ingredient is not to present a risk of contamination. It is to be of the same standard as potable water, unless the competent authority is satisfied that the quality of the water cannot affect the wholesomeness of the foodstuff in its finished form.	3. Reciklirana voda koja se upotrebljava u preradi ili kao sastojak ne smije predstavljati opasnost od kontaminacije. Ona mora odgovarati normama vode za piće, osim ako se nadležnom tijelu dokaže da kakvoća vode ne može utjecati na cjelovitost hrane u njezinom konačnom obliku.	Is "risk" translated as "hazard" ("opasnost") in "risk of contamination"?
HR	risk	17	2. No person suffering from, or being a carrier of a disease likely to be transmitted through food or afflicted, for example, with infected wounds, skin infections, sores or diarrhoea is to be permitted to handle food or enter any food-handling area in any capacity if there is any likelihood of direct or indirect contamination. Any person so affected and employed in a food business and who is lik…	2. Nijednoj osobi koja boluje od bolesti što se može prenijeti hranom ili koja je nositelj takve bolesti, kao ni osobama koje imaju, na primjer, inficirane ozljede, kožne infekcije i rane ili proljev ne smije se dopustiti rukovanje hranom ili ulazak u prostor u kojemu se rukuje hranom, u kakvom god svojstvu, ako postoji bilo kakva opasnost od izravne ili neizravne kontaminacije. Svaka takva osoba…	Is "likelihood of direct and indirect contamination" translated as "hazard of direct and indirect contamination" ("opasnost od izravne ili neizravne kontaminacije")? Is the translation acceptable? Should it be translated "vjerojatnost izravne i neizravne kontaminacije" or in another way?
HR	risk	18	7. The thawing of foodstuffs is to be undertaken in such a way as to minimise the risk of growth of pathogenic microorganisms or the formation of toxins in the foods. During thawing, foods are to be subjected to temperatures that would not result in a risk to health. Where run-off liquid from the thawing process may present a risk to health it is to be adequately drained. Following thawing, food …	7. Odmrzavanje hrane treba obaviti na takav način da opasnost od razvoja patogenih mikroorganizama ili stvaranja toksina u hrani bude svedena na najmanju mjeru. Tijekom odmrzavanja, hranu treba podvrgnuti temperaturama koje ne predstavljaju rizik za zdravlje. Ako bi tekućina koja nastaje otapanjem mogla predstavljati rizik za zdravlje, mora se na odgovarajući način riješiti njezino odvodnjavanje.…	Is " risk" translated as "hazard" ("opasnost od razvoja") in "risk of development"?
New version
Language	Term	Location (doc page)	English	Translation	Observation	EFSA Focal Point
HR	hazard	-	-	-	-	-
Language	Term	Location (doc page)	English	Translation	Observation	EFSA Focal Point
HR	risk	18	8. Drainage facilities are to be adequate for the purpose intended. They are to be designed and constructed to avoid the risk of contamination. Where drainage channels are fully or partially open, they are to be so designed as to ensure that waste does not flow from a contaminated area towards or into a clean area, in particular an area where foods likely to present a high risk to the final consu…	8. Sustavi za odvod otpadnih voda moraju odgovarati svrsi kojoj su namijenjeni. Moraju biti tako projektirani i izgrađeni da se izbjegne opasnost od kontaminacije. Ako su odvodni kanali u cijelosti ili djelomično otvoreni, moraju biti tako projektirani da se osigura da voda ne teče iz kontaminiranog područja prema čistom području ili u čisto područje, pogotovo u područje u kojemu se rukuje hranom…	Is "risk" translated as "hazard" ("opasnost") in "risk of contamination"?
HR	risk	19	1. Premises and vending machines are, so far as is reasonably practicable, to be so sited, designed, constructed and kept clean and maintained in good repair and condition as to avoid the risk of contamination, in particular by animals and pests.	1. Prostorije i automati za prodaju moraju, koliko god je to izvedivo, biti tako smješteni, izgrađeni, čišćeni i održavani da se spriječi opasnost od kontaminacije, posebno putem životinja ili štetnika.	Is "risk" translated as "hazard" ("opasnost") in "risk of contamination"?
HR	risk	19	(h) foodstuffs are to be so placed as to avoid the risk of contamination so far as is reasonably practicable	(h) hrana mora biti smještena tako da se izbjegne opasnost od kontaminacije koliko god je to izvedivo.	Is "risk" translated as "hazard" ("opasnost") in "risk of contamination"?
HR	risk	20	5. Where conveyances and/or containers have been used for transporting anything other than foodstuffs or for transporting different foodstuffs, there is to be effective cleaning between loads to avoid the risk of contamination.	5. Ako se prijevozna sredstva i/ili spremnici upotrebljavaju za prijevoz bilo čega drugoga osim hrane ili za prijevoz različite hrane, oni se moraju temeljito očistiti između pojedinih utovara/istovara kako bi se izbjegla opasnost od kontaminacije.	Is "risk" translated as "hazard" ("opasnost") in "risk of contamination"?
HR	risk	20	6. Foodstuffs in conveyances and/or containers are to be so placed and protected as to minimise the risk of contamination.	6. Hrana u prijevoznim sredstvima i/ili spremnicima mora biti tako smještena I zaštićena da je opasnost od kontaminacije minimalna.	Is "risk" translated as "hazard" ("opasnost") in "risk of contamination"?
HR	risk	20	(a) be effectively cleaned and, where necessary, disinfected. Cleaning and disinfection are to take place at a frequency sufficient to avoid any risk of contamination;	(a) biti učinkovito očišćeni i, prema potrebi, dezinficirani. Čišćenje i dezinfekcija moraju se obavljati dovoljno često da se izbjegne svaka opasnost od kontaminacije;	Is "risk" translated as "hazard" ("opasnost") in "risk of contamination"?
HR	risk	20	(b) be so constructed, be of such materials and be kept in such good order, repair and condition as to minimise any risk of contamination;	(b) biti tako izrađeni, od takvog materijala i održavani u tako dobrom stanju da se opasnost od kontaminacije smanji na najmanju mjeru;	Is "risk" translated as "hazard" ("opasnost") in "risk of contamination"?
HR	risk	22	3. Recycled water used in processing or as an ingredient is not to present a risk of contamination. It is to be of the same standard as potable water, unless the competent authority is satisfied that the quality of the water cannot affect the wholesomeness of the foodstuff in its finished form.	3. Reciklirana voda koja se upotrebljava u preradi ili kao sastojak ne smije predstavljati opasnost od kontaminacije. Ona mora odgovarati normama vode za piće, osim ako se nadležnom tijelu dokaže da kakvoća vode ne može utjecati na cjelovitost hrane u njezinom konačnom obliku.	Is "risk" translated as "hazard" ("opasnost") in "risk of contamination"?
HR	risk	22	2. No person suffering from, or being a carrier of a disease likely to be transmitted through food or afflicted, for example, with infected wounds, skin infections, sores or diarrhoea is to be permitted to handle food or enter any food-handling area in any capacity if there is any likelihood of direct or indirect contamination. Any person so affected and employed in a food business and who is lik…	2. Nijednoj osobi koja boluje od bolesti što se može prenijeti hranom ili koja je nositelj takve bolesti, kao ni osobama koje imaju, na primjer, inficirane ozljede, kožne infekcije i rane ili proljev ne smije se dopustiti rukovanje hranom ili ulazak u prostor u kojemu se rukuje hranom, u kakvom god svojstvu, ako postoji bilo kakva opasnost od izravne ili neizravne kontaminacije. Svaka takva osoba…	Is "likelihood of direct and indirect contamination" translated as "hazard of direct and indirect contamination" ("opasnost od izravne ili neizravne kontaminacije")? Is it appropriate? Should it be translated "vjerojatnost izravne i neizravne kontaminacije"?
HR	risk	23	7. The thawing of foodstuffs is to be undertaken in such a way as to minimise the risk of growth of pathogenic microorganisms or the formation of toxins in the foods. During thawing, foods are to be subjected to temperatures that would not result in a risk to health. Where run-off liquid from the thawing process may present a risk to health it is to be adequately drained. Following thawing, food …	7. Odmrzavanje hrane treba obaviti na takav način da opasnost od razvoja patogenih mikroorganizama ili stvaranja toksina u hrani bude svedena na najmanju mjeru. Tijekom odmrzavanja, hranu treba podvrgnuti temperaturama koje ne predstavljaju rizik za zdravlje. Ako bi tekućina koja nastaje otapanjem mogla predstavljati rizik za zdravlje, mora se na odgovarajući način riješiti njezino odvodnjavanje.…	Is "risk" translated as "hazard" ("opasnost") in "risk of growth"?

## Sheet: REG 853-2004
Old version
Language	Term	Location (doc page)	English	Translation	Observation	EFSA Focal Point
HR	hazard	-	-	-	-	-
Language	Term	Location (doc page)	English	Translation	Observation	EFSA Focal Point
HR	risk	22	9. When not skinned, porcine animals must have their bristles removed immediately. The risk of contamination of the meat with scalding water must be minimised. Only approved additives may be used for this operation. Porcine animals must be thoroughly rinsed afterwards with potable water.	9. Ako im se ne skida koža, svinjama se moraju odmah ukloniti čekinje. Opasnost od kontaminacije mesa putem vode za šurenje mora se svesti na najmanju moguću mjeru. Pri ovom se postupku smiju upotrebljavati samo odobreni aditivi. Nakon toga, svinje se moraju temeljito isprati pitkom vodom.	Is "risk" translated as "hazard" ("opanost") in "risk of contamination"?
HR	risk	29	(a) the animals cannot be transported, to avoid any risk for the handler or to protect the welfare of the animals;	(a) ako se životinje se ne mogu prevoziti, kako bi se izbjegla opasnost za osobu koja njima rukuje ili zaštitila dobrobit životinja;	Is "risk" translated as "hazard" ("opanost") in "any risk"?
HR	risk	30	2. The trained person must carry out an examination of the body, and of any viscera removed, to identify any characteristics that may indicate that the meat presents a health risk. The examination must take place as soon as possible after killing.	2. Izučena osoba mora pregledati tijelo i sve uklonjene unutarnje organe kako bi utvrdila sve značajke koje bi mogle ukazivati na to da meso predstavlja opasnost po zdravlje. Pregled se mora obaviti što je moguće prije nakon odstrela	Is "risk" translated as "hazard" ("opanost") in "health risk"?
HR	risk	31	1. The trained person must carry out an examination to identify any characteristics that may indicate that the meat presents a health risk. The examination must take place as soon as possible after killing.	1. Izučena osoba mora obaviti pregled kako bi utvrdila sve značajke koje bi mogle ukazivati da meso predstavlja opasnost po zdravlje. Pregled se mora obaviti što je moguće prije nakon odstrela	Is "risk" translated as "hazard" ("opanost") in "health risk"?
HR	risk	38	1. Food business operators may use only those areas that the competent authority has approved for relaying live bivalve molluscs. Buoys, poles or other fixed means must clearly identify the boundaries of the sites. There must be a minimum distance between relaying areas, and also between relaying areas and production areas, so as to minimise any risk of the spread of contamination.	1. Subjekti u poslovanju s hranom smiju koristiti samo ona područja koja je nadležno tijelo odobrilo za polaganje živih školjaka. Granice područja moraju biti jasno označene plutačama, stupovima ili drugim pričvršćenim sredstvima. Kako bi se opasnost od širenja kontaminacije svela na najmanju moguću mjeru, mora postojati minimalna udaljenost između pojedinih područja za ponovno polaganje, kao i i…	Is "risk" translated as "hazard" ("opanost") in "any risk"?
HR	risk	47	(b) is stored in such a manner that it is not exposed to a risk of contamination;	(b) bude pohranjen na takav način da nije izložen opasnosti od kontaminacije;	Is "risk" translated as "hazard" ("opanost") in "risk of contamination"?
HR	risk	50	1. Milking equipment, and premises where milk is stored, handled or cooled must be located and constructed so as to limit the risk of contamination of milk.	1. Oprema za mužnju te prostori u kojima se mlijeko skladišti, njime rukuje ili se hladi moraju biti tako smješteni i izgrađeni da se ograniči opasnost od kontaminacije mlijeka.	Is "risk" translated as "hazard" ("opanost") in "risk of contamination"?
New version
Language	Term	Location (page)	English	Translation	Observation	EFSA Focal Point
HR	hazard	63	6. Where fish are headed and/or gutted on board, such operations must be carried out hygienically as soon as possible after capture, and the fishery products must be washed immediately. The viscera and parts that may constitute a danger to public health must be removed as soon as possible and kept apart from fishery products intended for human consumption. Livers and roes intended for human consu…	6. Ako se ribama na palubi uklanja glava i/ili utroba, takvi se postupci moraju provoditi na higijenski način što prije nakon ulova, a proizvodi ribarstva odmah se moraju oprati. Utroba i dijelovi koji mogu predstavljati opasnost po javno zdravlje moraju se što prije ukloniti i držati podalje od proizvoda ribarstva namijenjenih prehrani ljudi. Jetra i ikra namijenjeni prehrani ljudi moraju se hla…	Is "danger" translated using the word for "hazard" ("opanost")? Should there be a differentiation between danger and hazard?
HR	hazard	77	5. After breaking, each particle of the liquid egg must undergo processing as quickly as possible to eliminate microbiological hazards or to reduce them to an acceptable level. A batch that has been insufficiently processed may immediately undergo processing again in the same establishment if this processing renders it fit for human consumption. Where a batch is found to be unfit for human consum…	5. Nakon razbijanja, svaka se čestica jajčane mase mora čim prije podvrgnuti obradi da bi se otklonili mikrobiološki rizici ili da bi ih se smanjilo na prihvatljivu razinu. Serija koja je nedostatno obrađena može se odmah podvrgnuti ponovnoj obradi u istom pogonu, ako će nakon toga biti pogodna za prehranu ljudi. Ako se pokaže da je serija nepodobna za prehranu ljudi, ona se mora denaturirati kak…	Is "hazard" translated as "risk" ("rizici") in "microbiological hazards"?
Language	Term	Location (doc page)	English	Translation	Observation	EFSA Focal Point
HR	risk	28	9. When not skinned, porcine animals must have their bristles removed immediately. The risk of contamination of the meat with scalding water must be minimised. Only approved additives may be used for this operation. Porcine animals must be thoroughly rinsed afterwards with potable water.	9. Ako im se ne skida koža, svinjama se moraju odmah ukloniti čekinje. Opasnost od kontaminacije mesa putem vode za šurenje mora se svesti na najmanju moguću mjeru. Pri ovom se postupku smiju upotrebljavati samo odobreni aditivi. Nakon toga, svinje se moraju temeljito isprati pitkom vodom.	Is "risk" translated as "hazard" ("opanost") in "risk of contamination"?
HR	risk	40	(a) the animals cannot be transported, to avoid any risk for the handler or to protect the welfare of the animals;	(a) ako se životinje se ne mogu prevoziti, kako bi se izbjegla opasnost za osobu koja njima rukuje ili zaštitila dobrobit životinja;	Is "risk" translated as "hazard" ("opanost") in "any risk"?
HR	risk	42	2. The trained person must carry out an examination of the body, and of any viscera removed, to identify any characteristics that may indicate that the meat presents a health risk. The examination must take place as soon as possible after killing.	2. Izučena osoba mora pregledati tijelo i sve uklonjene unutarnje organe kako bi utvrdila sve značajke koje bi mogle ukazivati na to da meso predstavlja opasnost po zdravlje. Pregled se mora obaviti što je moguće prije nakon odstrela.	Is "risk" translated as "hazard" ("opanost") in "health risk"?
HR	risk	42	1. The trained person must carry out an examination to identify any characteristics that may indicate that the meat presents a health risk. The examination must take place as soon as possible after killing.	1. Izučena osoba mora obaviti pregled kako bi utvrdila sve značajke koje bi mogle ukazivati da meso predstavlja opasnost po zdravlje. Pregled se mora obaviti što je moguće prije nakon odstrela	Is "risk" translated as "hazard" ("opanost") in "health risk"?
HR	risk	53	1. Food business operators may use only those areas that the competent authority has approved for relaying live bivalve molluscs. Buoys, poles or other fixed means must clearly identify the boundaries of the sites. There must be a minimum distance between relaying areas, and also between relaying areas and production areas, so as to minimise any risk of the spread of contamination.	1. Subjekti u poslovanju s hranom smiju koristiti samo ona područja koja je nadležno tijelo odobrilo za polaganje živih školjaka. Granice područja moraju biti jasno označene plutačama, stupovima ili drugim pričvršćenim sredstvima. Kako bi se opasnost od širenja kontaminacije svela na najmanju moguću mjeru, mora postojati minimalna udaljenost između pojedinih područja za ponovno polaganje, kao i i…	Is "risk" translated as "hazard" ("opanost") in "any risk"?
HR	risk	68	(b) is stored in such a manner that it is not exposed to a risk of contamination;	(b) bude pohranjen na takav način da nije izložen opasnosti od kontaminacije;	Is "risk" translated as "hazard" ("opanost") in "risk of contamination"?

## Sheet: REG 625-2017
Old version
Language	Term	Location (doc page)	English	Translation	Observation	EFSA Focal Point
HR	hazard	-	-	-	-	-
Language	Term	Location (doc page)	English	Translation	Observation	EFSA Focal Point
HR	risk	-	-	-	-	-
New version
Language	Term	Location (doc page)	English	Translation	Observation	EFSA Focal Point
HR	hazard	-	-	-	-	-
Language	Term	Location (doc page)	English	Translation	Observation	EFSA Focal Point
HR	risk	-	-	-	-	-

## Sheet: REG 1381-2019
Single version
Language	Term	Location (doc page)	English	Translation	Observation	EFSA Focal Point
HR	hazard	-	-	-	-	-
Language	Term	Location (doc page)	English	Translation	Observation	EFSA Focal Point
HR	risk	-	-	-	-	-
