# Supplementary material for: Food Risk Analysis: Towards a Better Understanding of „Hazard” and „Risk” in EU food legislation
Source: Preprints.org preprint supplement (doi:10.20944/preprints202306.1556.v1), 2023-06-21
Supplement: Supplementary file 15 [file HU - 2nd opinion.xlsx]

## Sheet: REG 178-2002
Old version
Language	Term	Location (doc page)	English	Translation	Observation	2nd opinion
HU	hazard	3	(28) Experience has shown that the functioning of the internal market in food or feed can be jeopardised where it is impossible to trace food and feed. It is therefore necessary to establish a comprehensive system of traceability within food and feed businesses so that targeted and accurate withdrawals can be undertaken or information given to consumers or control officials, thereby avoiding the …	(28) Tapasztalatok igazolják, hogy az élelmiszer és takarmány belső piacának működését veszélyezteti, ha az élelmiszerek és takarmányok útja nem követhető nyomon. Ezért az élelmiszer- és takarmányiparban fel kell állítani egy átfogó nyomon követési rendszert, amelynek segítségével el lehet végezni a különböző termékek célzott és pontos kivonását a piacról, illetve tájékoztatni lehet a fogyasztóka…	1. Is "jeoperdised" translated with the word for "hazard" ("veszélyezteti")? 2. Is the translation acceptable?
HU	hazard	4	(37) Since some products authorised under food law such as pesticides or additives in animal feed may involve risks to the environment or to the safety of workers, some environmental and worker protection aspects should also be assessed by the Authority in accordance with the relevant legislation.	(37) Miután az élelmiszerjog alapján engedélyezett bizonyos termékek, pl. peszticidek, vagy takarmány-adalékanyagok veszélyeztethetik a környezetet vagy a munkavállalók biztonságát, a Hatóságnak a vonatkozó szabályozással összhangban bizonyos környezetvédelmi és munkavédelmi kérdésekre is ki kell terjesztenie tevékenységét.	1. Is "risk" translated as "hazard" ("veszélyeztethetik") in " may involve risks to the environment"? 2. Is the translation accurate or should it be actually with "risk" ("kockázat")?
HU	hazard	5	(59) A system for rapid alert already exists in the framework of Council Directive 92/59/EEC of 29 June 1992 on general product safety (1). The scope of the existing system includes food and industrial products but not feed. Recent food crises have demonstrated the need to set up an improved and broadened rapid alert system covering food and feed. This revised system should be managed by the Comm…	(59) Az általános termékbiztonságról szóló, 1992. június 29-i 92/59/EGK tanácsi irányelv (1) szerint már létrejött egy sürgősségi riasztórendszer. A jelenlegi rendszer élelmiszerekre és ipari termékekre vonatkozik, takarmányokra nem. A közelmúlt élelmiszerválságai felhívták a figyelmet az élelmiszerekre és takarmányokra vonatkozó hatékonyabb és szélesebb körű sürgősségi riasztórendszer felállítás…	1. Is "emergency" translated with the word for "hazard" ("veszélyhelyzet") in "radiological emergency"? 2. Is the translation acceptable?
HU	hazard	18	For this purpose, they shall make a declaration of commitment and a declaration of interests indicating either the absence of any interests which might be considered prejudicial to their independence or any direct or indirect interests which might be considered prejudicial to their independence. Those declarations shall be made annually in writing.	Ennek érdekében a fent említett személyek kötelezettségvállalási és érdekeltségi nyilatkozatot tesznek, amelyben vagy kijelentik, hogy nincsenek olyan érdekeltségeik, amelyekről feltételezhető, hogy veszélyeztethetik függetlenségüket, vagy megnevezik azokat a közvetlen vagy közvetett érdekeltségeiket, amelyekről feltételezhető, hogy veszélyeztethetik függetlenségüket. Ezeket a nyilatkozatokat éve…	1. Is "prejudicial" translated using the word for "hazard" ("veszélyeztethetik")? 2. Is the translation acceptable?
HU	hazard	18	3. The members of the Management Board, the Executive Director, the members of the Advisory Forum, the members of the Scientific Committee and the Scientific Panels, as well as external experts participating in their working groups shall declare at each meeting any interests which might be considered prejudicial to their independence in relation to the items on the agenda.	(3) Az Igazgatótanács és a Tanácsadó Fórum tagjai, az ügyvezető igazgató, a Tudományos Bizottság és a tudományos testületek tagjai, valamint a munkacsoportokban dolgozó külső szakértők minden ülésen bejelentik azokat az érdekeltségeiket, amelyek a napirendi pontok vonatkozásában veszélyeztethetik függetlenségüket.	1. Is "prejudicial" translated using the word for "hazard" ("veszélyeztethetik")? 2. Is the translation acceptable?
HU	hazard	22	EMERGENCIES	VESZÉLYHELYZETEK	1. Is "emergencies" translated as "hazardous situations" ("VESZÉLYHELYZETEK")? 2. Is the translation acceptable?
Language	Term	Location (doc page)	English	Translation	Observation	2nd opinion
HU	hazard	5	(60) Recent food safety incidents have demonstrated the need to establish appropriate measures in emergency situations ensuring that all foods, whatever their type and origin, and all feed should be subject to common measures in the event of a serious risk to human health, animal health or the environment. Such a comprehensive approach to emergency food safety measures should allow effective acti…	(60) A közelmúlt élelmiszerbiztonsággal összefüggő eseményei bizonyították, hogy veszélyhelyzetekben kellenek olyan intézkedések, amelyek azt a célt szolgálják, hogy az összes élelmiszer – jellegétől és származásától függetlenül –, valamint az összes takarmány az emberek és az állatok egészségét és a környezetet fenyegető súlyos veszély esetén egységes eljárások hatálya alá tartozzék. A veszélyhe…	1. Is "risk" translated as "hazard" ("veszély") in "risk to human health"? 2. Is the translation accurate or should it actually be with "risk" ("kockázat")?
HU	hazard	9	Without prejudice to the applicable provisions of Community and national law on access to documents, where there are reasonable grounds to suspect that a food or feed may present a risk for human or animal health, then, depending on the nature, seriousness and extent of that risk, public authorities shall take appropriate steps to inform the general public of the nature of the risk to health, ide…	A Közösség és az egyes tagállamok jogszabályaiban a dokumentumokhoz való hozzáférésre vonatkozó rendelkezések sérelme nélkül, minden olyan esetben, amikor fennáll az alapos gyanúja annak, hogy egy élelmiszer vagy takarmány veszélyt jelenthet az emberek vagy az állatok egészségére, a hatóságok a kockázat jellegének, súlyának és mértékének figyelembevételével megteszik a szükséges intézkedéseket az…	1. Is "risk"" translated as "hazard" ("veszélyt") in "risk that it may present"? 2. Is the translation accurate or should it actually be with "risk" ("kockázat")?
HU	hazard	12	3. A food business operator shall immediately inform the competent authorities if it considers or has reason to believe that a food which it has placed on the market may be injurious to human health. Operators shall inform the competent authorities of the action taken to prevent risks to the final consumer and shall not prevent or discourage any person from cooperating, in accordance with nationa…	(3) Az élelmiszeripari vállalkozó haladéktalanul tájékoztatja az illetékes hatóságokat, amennyiben úgy véli vagy okkal feltételezi, hogy az általa forgalomba hozott élelmiszer ártalmas lehet az egészségre. A vállalkozó bejelenti az illetékes hatóságoknak a végső fogyasztót fenyegető veszély megelőzésére tett intézkedéseket, és nem akadályozhat meg senkit abban, hogy a tagállam jogrendszerével és …	1. Is "risk" translated as "hazard"("veszély") in "eliminate a risk arising from food"? 2. Is the translation accurate or should it actually be with "risk" ("kockázat")?
HU	hazard	12	3. A feed business operator shall immediately inform the competent authorities if it considers or has reason to believe that a feed which it placed on the market may not satisfy the feed safety requirements. It shall inform the competent authorities of the action taken to prevent risk arising from the use of that feed and shall not prevent or discourage any person from cooperating, in accordance …	(3) A takarmányipari vállalkozó haladéktalanul tájékoztatja az illetékes hatóságokat, amennyiben úgy véli vagy okkal feltételezi, hogy az általa forgalomba hozott takarmány nem felel meg a takarmánybiztonsági követelményeknek. A vállalkozó bejelenti az illetékes hatóságoknak a takarmány felhasználásából származó veszély megelőzésére tett intézkedéseket, és nem akadályozhat meg senkit abban, hogy …	1. Is "risk" translated as "hazard"("veszély") in "eliminate a risk arising from food"? 2. Is the translation accurate or should it actually be with "risk" ("kockázat")?
HU	hazard	21	1. A rapid alert system for the notification of a direct or indirect risk to human health deriving from food or feed is hereby established as a network. It shall involve the Member States, the Commission and the Authority. The Member States, the Commission and the Authority shall each designate a contact point, which shall be a member of the network. The Commission shall be responsible for managi…	(1) Létrehoznak egy hálózatként működő sürgősségi riasztórendszert, amely az élelmiszerekből és takarmányokból származó, az emberi egészséget közvetve vagy közvetlenül érintő veszélyt jelzi. A rendszer kiterjed a tagállamokra, a Bizottságra és a Hatóságra. A tagállamok, a Bizottság és a Hatóság mindegyike megbízza a hálózat egy tagját a kapcsolattartással. A Bizottság felelős a hálózat működtetés…	1. Is "risk" translated as "hazard" ("veszély") in "risk to human health"? 2. Is the translation accurate or should it actually be with "risk" ("kockázat")?
HU	hazard	21	Where a batch, container or cargo is rejected by a competent authority at a border post within the European Union, the Commission shall immediately notify all the border posts within the European Union, as well as the third country of origin	Amennyiben az Európai Unió területén valamelyik határátkelőhelyen közvetlen vagy közvetett egészségügyi kockázat miatt visszafordítanak egy tételt, szállítótartályt vagy szállítmányt, a Bizottság haladéktalanul értesíti az Unió területén található határátkelőhelyeket, valamint az áru származása szerinti harmadik országot.	1. Is the word "risk" ("kockázat") added in the Hungarian version? 2. Is the translation acceptable or is there an addition to the text?
HU	hazard	21	1. A rapid alert system for the notification of a direct or indirect risk to human health deriving from food or feed is hereby established as a network. It shall involve the Member States, the Commission and the Authority. The Member States, the Commission and the Authority shall each designate a contact point, which shall be a member of the network. The Commission shall be responsible for managi…	(1) Létrehoznak egy hálózatként működő sürgősségi riasztórendszert, amely az élelmiszerekből és takarmányokból származó, az emberi egészséget közvetve vagy közvetlenül érintő veszélyt jelzi. A rendszer kiterjed a tagállamokra, a Bizottságra és a Hatóságra. A tagállamok, a Bizottság és a Hatóság mindegyike megbízza a hálózat egy tagját a kapcsolattartással. A Bizottság felelős a hálózat működtetés…	1. Is "risk" ("kockázat")" translated as "hazard" ("veszélyt")? 2. Is the translation accurate or should it actually be with "risk" ("kockázat")?
HU	hazard	22	The general plan shall also specify the practical procedures necessary to manage a crisis, including the principles of transparency to be applied and a communication strategy.	Az általános terv meghatározza a kockázatkezeléshez szükséges gyakorlati eljárásokat, beleértve az átláthatóság elveit és egy kommunikációs stratégiát is.	Is "manage a crisis" translated as "risk management" ("kockázatkezeléshez")? Is the translation acceptable?
HU	hazard	22	1. Where it is evident that food or feed originating in the Community or imported from a third country is likely to constitute a serious risk to human health, animal health or the environment, and that such risk cannot be contained satisfactorily by means of measures taken by the Member State(s) concerned, the Commission, acting in accordance with the procedure provided for in Article 58(2) on it…	(1) Amennyiben nyilvánvaló, hogy a Közösségből származó vagy harmadik országból behozott élelmiszer vagy takarmány súlyos veszélyt jelent az emberek egészségére, az állatok egészségére vagy a környezetre, és az érintett tagállam (tagállamok) által hozott intézkedésekkel ezt a kockázatot nem lehet eredményesen csökkenteni, a Bizottság az 58. cikk (2) bekezdésével összhangban, saját kezdeményezésér…	1. Is "risk" translated as "hazard"("veszély") in "a serious risk to human"? 2. Is the translation accurate or should it actually be with "risk" ("kockázat")?
New version
Language	Term	Location (doc page)	English	Translation	Observation	2nd opinion
HU	hazard	-	-	-	-	-
Language	Term	Location (doc page)	English	Translation	Observation	2nd opinion
HU	hazard	9	Without prejudice to the applicable provisions of Community and national law on access to documents, where there are reasonable grounds to suspect that a food or feed may present a risk for human or animal health, then, depending on the nature, seriousness and extent of that risk, public authorities shall take appropriate steps to inform the general public of the nature of the risk to health, ide…	A Közösség és az egyes tagállamok jogszabályaiban a dokumentumokhoz való hozzáférésre vonatkozó rendelkezések sérelme nélkül, minden olyan esetben, amikor fennáll az alapos gyanúja annak, hogy egy élelmiszer vagy takarmány veszélyt jelenthet az emberek vagy az állatok egészségére, a hatóságok a kockázat jellegének, súlyának és mértékének figyelembevételével megteszik a szükséges intézkedéseket az…	1. Is "risk" translated as "hazard" ("veszélyt") in "risk for human and animal health"? 2. Is the translation accurate or should it actually be with "risk" ("kockázat")?
HU	hazard	14	3. A food business operator shall immediately inform the competent authorities if it considers or has reason to believe that a food which it has placed on the market may be injurious to human health. Operators shall inform the competent authorities of the action taken to prevent risks to the final consumer and shall not prevent or discourage any person from cooperating, in accordance with nationa…	(3) Az ►C2 élelmiszer-vállalkozó ◄ haladéktalanul tájékoztatja az illetékes hatóságokat, amennyiben úgy véli vagy okkal feltételezi, hogy az általa forgalomba hozott élelmiszer ártalmas lehet az egészségre. A vállalkozó bejelenti az illetékes hatóságoknak a végső fogyasztót fenyegető veszély megelőzésére tett intézkedéseket, és nem akadályozhat meg senkit abban, hogy a tagállam jogrendszerével és…	1. Is "risk" translated as "hazard"("veszély") in "risks to the final consumer" and "eliminate a risk"? 2. Is the translation accurate or should it actually be with "risk" ("kockázat")?
HU	hazard	25	2. The Authority shall consult stakeholders and the public on the basis of the non-confidential version of the application or notification made public by the Authority in accordance with Articles 38 to 39e, and immediately after such disclosure to the public, in order to identify whether other relevant scientific data or studies are available on the subject matter concerned by the application or …	(2) A Hatóság a kérelemnek vagy bejelentésnek az általa a 38–39e. cikkel összhangban közzétett, bizalmas információkat nem tartalmazó változata alapján, közvetlenül az ilyen közzétételt követően konzultációt folytat az érdekelt felekkel és a közvéleménnyel annak megállapítása céljából, hogy a kérelem vagy bejelentés tárgyára vonatkozóan rendelkezésre állnak-e egyéb lényeges tudományos adatok vagy…	1. Is "risk" translated as "hazard"("fennáll a veszélye annak")? 2. Is the translation accurate or should it actually be with "risk" ("kockázat")?
HU	hazard	40	1. A rapid alert system for the notification of a direct or indirect risk to human health deriving from food or feed is hereby established as a network. It shall involve the Member States, the Commission and the Authority. The Member States, the Commission and the Authority shall each designate a contact point, which shall be a member of the network. The Commission shall be responsible for managi…	(1) Létrehoznak egy hálózatként működő sürgősségi riasztórendszert, amely az élelmiszerekből és takarmányokból származó, az emberi egészséget közvetve vagy közvetlenül érintő veszélyt jelzi. A rendszer kiterjed a tagállamokra, a Bizottságra és a Hatóságra. A tagállamok, a Bizottság és a Hatóság mindegyike megbízza a hálózat egy tagját a kapcsolattartással. A Bizottság felelős a hálózat működtetés…	1. Is "risk" translated as "hazard" ("veszélyeztető")" in "risk to human "? 2. Is the translation accurate or should it actually be with "risk" ("kockázat")?
HU	hazard	42	1. Where it is evident that food or feed originating in the Community or imported from a third country is likely to constitute a serious risk to human health, animal health or the environment, and that such risk cannot be contained satisfactorily by means of measures taken by the Member State(s) concerned, the Commission, acting in accordance with the procedure provided for in Article 58(2) on it…	(1) Amennyiben nyilvánvaló, hogy a Közösségből származó vagy harmadik országból behozott élelmiszer vagy takarmány súlyos veszélyt jelent az emberek egészségére, az állatok egészségére vagy a környezetre, és az érintett tagállam (tagállamok) által hozott intézkedésekkel ezt a kockázatot nem lehet eredményesen csökkenteni, a Bizottság az 58. cikk (2) bekezdésével összhangban, saját kezdeményezésér…	1. Is "risk" translated as "hazard"("veszély") in "serious risk to human health, animal health or the environment"? 2. Is the translation accurate or should it actually be with "risk" ("kockázat")?

## Sheet: REG 852-2004
Old version
Language	Term	Location (doc page)	English	Translation	Observation	2nd opinion
HU	hazard	-	-	-	-	-
Language	Term	Location (doc page)	English	Translation	Observation	2nd opinion
HU	risk	17	3. Recycled water used in processing or as an ingredient is not to present a risk of contamination. It is to be of the same standard as potable water, unless the competent authority is satisfied that the quality of the water cannot affect the wholesomeness of the foodstuff in its finished form.	(3) A feldolgozásban vagy összetevőként használt újrahasznosított víz nem jelenthet fertőzésveszélyt. Annak az ivóvízzel megegyező minőségűnek kell lennie, kivéve ha a hatáskörrel rendelkező hatóság meggyőződött arról, hogy a víz minősége az élelmiszer kész formájának egészséges voltára nincs hatással.	1. Is "risk " translated as "hazard" ("fertőzésveszélyt") in "risk of contamination"? 2. Is the translation accurate or should it actually be with "risk" ("kockázat")?
HU	risk	17	2. No person suffering from, or being a carrier of a disease likely to be transmitted through food or afflicted, for example, with infected wounds, skin infections, sores or diarrhoea is to be permitted to handle food or enter any food-handling area in any capacity if there is any likelihood of direct or indirect contamination. Any person so affected and employed in a food business and who is lik…	(2) Nem kezelhet élelmiszereket, és semmilyen minőségben nem léphet be egyetlen, élelmiszerek kezelésére szolgáló területre sem olyan személy, aki élelmiszerek útján valószínűleg átvihető betegségben szenved, vagy annak hordozója, vagy például elfertőződött sebe, bőrfertőzése, gennyes sebe vagy hasmenése van, amennyiben a közvetlen vagy közvetett fertőzés veszélye fennáll. Az ily módon érintett é…	1. Is "contamination" translated as "hazard" ("likelihood of direct or indirect contamination"? 2. Is the translation acceptable?
HU	risk	18	2. Wrapping materials are to be stored in such a manner that they are not exposed to a risk of contamination.	(2) Az egyedi csomagoláshoz használt anyagokat úgy kell tárolni, hogy a szenynyeződés veszélyének ne legyenek kitéve	1. Is "risk" translated as "hazard" ("zenynyeződés veszélyének") in "risk of contamination"? 2. Is the translation accurate or should it actually be with "risk" ("kockázat")?
New version
Language	Term	Location (doc page)	English	Translation	Observation	2nd opinion
HU	hazard	-	-	-	-	-
Language	Term	Location (doc page)	English	Translation	Observation	2nd opinion
HU	risk	22	3. Recycled water used in processing or as an ingredient is not to present a risk of contamination. It is to be of the same standard as potable water, unless the competent authority is satisfied that the quality of the water cannot affect the wholesomeness of the foodstuff in its finished form.	(3) A feldolgozásban vagy összetevőként használt újrahasznosított víz nem jelenthet fertőzésveszélyt. Annak az ivóvízzel megegyező minőségűnek kell lennie, kivéve ha a hatáskörrel rendelkező hatóság meggyőződött arról, hogy a víz minősége az élelmiszer kész formájának egészséges voltára nincs hatással.	1. Is "risk" translated as "hazard" ("fertőzésveszélyt" in "risk of contamination"? 2. Is the translation accurate or should it actually be with "risk" ("kockázat")?
HU	risk	22	2. No person suffering from, or being a carrier of a disease likely to be transmitted through food or afflicted, for example, with infected wounds, skin infections, sores or diarrhoea is to be permitted to handle food or enter any food-handling area in any capacity if there is any likelihood of direct or indirect contamination. Any person so affected and employed in a food business and who is lik…	(2) Nem kezelhet élelmiszereket, és semmilyen minőségben nem léphet be egyetlen, élelmiszerek kezelésére szolgáló területre sem olyan személy, aki élelmiszerek útján valószínűleg átvihető betegségben szenved, vagy annak hordozója, vagy például elfertőződött sebe, bőrfertőzése, gennyes sebe vagy hasmenése van, amennyiben a közvetlen vagy közvetett fertőzés veszélye fennáll. Az ily módon érintett é…	1. Is "contamination" translated as "hazard" ("likelihood of direct or indirect contamination"? 2. Is the translation acceptable?
HU	risk	24	2. Wrapping materials are to be stored in such a manner that they are not exposed to a risk of contamination.	(2) Az egyedi csomagoláshoz használt anyagokat úgy kell tárolni, hogy a szenynyeződés veszélyének ne legyenek kitéve	1. Is "risk" translated as "hazard" ("zenynyeződés veszélyének") in "risk of contamination"? 2. Is the translation accurate or should it actually be with "risk" ("kockázat")?

## Sheet: REG 853-2004
Old version
Language	Term	Location (doc page)	English	Translation	Observation	2nd opinion
HU	hazard	3	19) Flexibility is appropriate to enable the continued use of traditional methods at any of the stages of production, processing or distribution of food and in relation to structural requirements for establishments. Flexibility is particularly important for regions that are subject to special geographical constraints, including the outermost regions referred to in Article 299(2) of the Treaty. Ho…	(19) Helyénvaló a rugalmasság a hagyományos módszerek használata fenntartásának lehetővé tétele érdekében az élelmiszerek termelésének, feldolgozásának vagy forgalmazásának bármely szakaszában, valamint a létesítmények szerkezeti követelményeivel kapcsolatban. A rugalmasság különösen fontos a különleges földrajzi korlátokkal bíró régiók esetében, beleértve a Szerződés 299. cikke (2) bekezdésében …	1. Is the word for "hazard" ("veszélyeztetheti") used for expressing "not compromise"? 2. Is the translation acceptable?
HU	hazard	43	6. Where fish are headed and/or gutted on board, such operations must be carried out hygienically as soon as possible after capture, and the products must be washed immediately and thoroughly with potable water or clean water. In that event, the viscera and parts that may constitute a danger to public health must be removed as soon as possible and kept apart from products intended for human consu…	6. Amennyiben a hal fejét a fedélzeten távolítják el, illetve ott zsigerelik ki, a műveleteket a fogást követően a lehető leghamarabb, higiénikus körülmények között kell végrehajtani, és a termékeket azonnal és alaposan le kell mosni ivóvízzel vagy tiszta vízzel. Ebben az esetben a közegészségre veszélyt jelentő zsigereket és azok részeit a lehető leghamarabb el kell távolítani, és el kell különí…	1. Is "danger" translated as "hazard" ("veszélyt")? 2. Is the translation accurate or should should we differentiate between the terms better?
HU	hazard	43	(a) epidemiological data are available indicating that the fishing grounds of origin do not present a health hazard with regard to the presence of parasites; and	a) járványügyi adatok állnak rendelkezésre, amelyek azt mutatják, hogy a származási halászati terület az élősködők jelenléte tekintetében nem jelent egészségügyi kockázatot;	1. Is "hazard" as "risk" ("kockázatot")? 2. Is the translation accurate or should it actually be with "hazard" ("veszély")?
Language	Term	Location (doc page)	English	Translation	Observation	2nd opinion
HU	risk	19	1. (a) Slaughterhouses must have adequate and hygienic lairage facilities or, climate permitting, waiting pens that are easy to clean and disinfect. These facilities must be equipped for watering the animals and, if necessary, feeding them. The drainage of the wastewater must not compromise food safety.	1. a) A vágóhidaknak megfelelő és higiénikus, könnyen tisztítható és fertőtleníthető élőállatszállással, vagy – ha az éghajlati körülmények lehetővé teszik – karámmal kell rendelkezniük. Ezeket a létesítményeket fel kell szerelni az állatok itatására és szükség szerint etetésére szolgáló berendezésekkel. A szennyvízelvezetés nem veszélyeztetheti az élelmiszerbiztonságot.	1. Is the word for "hazard" ("veszélyeztetheti") used for expressing "not compromise"? 2. Is the translation acceptable?
New version
Language	Term	Location (doc page)	English	Translation	Observation	2nd opinion
HU	hazard	11	3. Member States may, without compromising achievement of the objectives of this Regulation, adopt, in accordance with paragraphs 4 to 8, national measures adapting the requirements laid down in Annex III.	(3) A tagállamok – e rendelet célkitűzései elérésének veszélyeztetése nélkül – a (4)–(8) bekezdéssel összhangban a III. mellékletben megállapított követelményeket kiigazító nemzeti intézkedéseket fogadhatnak el.	1. Is the word for "hazard" ("veszélyeztetése") used for expressing "not compromise"? 2. Is the translation acceptable?
HU	hazard	23	7. If the competent authority so permits and provided it does not jeopardise the objectives of this Regulation, food chain information may arrive less than 24 hours before the arrival of the animals of all species to which it relates at the slaughterhouse or accompany these animals to the slaughterhouse.	7. Amennyiben a hatáskörrel rendelkező hatóság engedélyezi, és amennyiben nem veszélyezteti e rendelet célkitűzéseit, elég, ha az élelmiszerláncra vonatkozó információk kevesebb mint 24 órával korábban vagy ugyanakkor érkeznek meg a vágóhídra, mint azok a bármely állatfajhoz tartozó egyedek, amelyekre az információk vonatkoznak.	1. Is the word "hazard" ("veszélyezteti ") used for expressing "does not jeopardise" in the Hungarian version? 2. Is the translation acceptable?
HU	hazard	25	1. (a) Slaughterhouses must have adequate and hygienic lairage facilities or, climate permitting, waiting pens that are easy to clean and disinfect. These facilities must be equipped for watering the animals and, if necessary, feeding them. The drainage of the wastewater must not compromise food safety.	1. a) A vágóhidaknak megfelelő és higiénikus, könnyen tisztítható és fertőtleníthető élőállatszállással, vagy – ha az éghajlati körülmények lehetővé teszik – karámmal kell rendelkezniük. Ezeket a létesítményeket fel kell szerelni az állatok itatására és szükség szerint etetésére szolgáló berendezésekkel. A szennyvízelvezetés nem veszélyeztetheti az élelmiszerbiztonságot.	1. Is the word "hazard" ("veszélyeztetheti") used for expressing "without compromising" in the Hungarian version? 2. Is the translation acceptable?
HU	hazard	63	6. Where fish are headed and/or gutted on board, such operations must be carried out hygienically as soon as possible after capture, and the fishery products must be washed immediately. The viscera and parts that may constitute a danger to public health must be removed as soon as possible and kept apart from fishery products intended for human consumption. Livers and roes intended for human consu…	6. Amennyiben a halak fejét a fedélzeten távolítják el, illetve azokat ott zsigerelik ki, a műveleteket a fogást követően a lehető leghamarabb, higiénikus körülmények között kell végrehajtani, a halászati termékeket pedig azonnal le kell mosni. Az esetlegesen népegészségügyi veszélyt jelentő zsigereket és azok részeit a lehető leghamarabb el kell távolítani, és el kell különíteni az emberi fogyas…	1. Is "danger" translated as "hazard" ("veszélyt")? 2. Is the translation accurate or should should we differentiate between the terms better?
HU	hazard	53	(i) there are epidemiological data available indicating that the fishing grounds of origin do not present a health hazard with regard to the presence of parasites; and	i. epidemiológiai adatok állnak rendelkezésre, amelyek azt mutatják, hogy a származási halászati terület az élősködők jelenléte tekintetében nem jelent egészségügyi kockázatot; valamint	1. Is "hazard" as "risk" ("kockázatot")? 2. Is the translation accurate or should it actually be with "hazard" ("veszély")?
HU	hazard	53	(d) derived from fish farming, cultured from embryos and have been fed exclusively on a diet that cannot contain viable parasites that present a health hazard, and one of the following requirements is complied with:	d) amelyek halgazdálkodásból származnak, és amelyeket embriókból neveltek, és kizárólag olyan takarmánnyal etettek, amely nem tartalmaz egészségügyi kockázatot jelentő életképes élősködőket, és az alábbi követelmények egyike teljesül:	1. Is "hazard" as "risk" ("kockázatot")? 2. Is the translation accurate or should it actually be with "hazard" ("veszély")?
HU	hazard	53	(ii) the food business operator verifies through procedures, approved by the competent authority, that the fishery products do not represent a health hazard with regard to the presence of viable parasites.	ii. az élelmiszer-ipari vállalkozó az illetékes hatóság által jóváhagyott eljárásokon keresztül ellenőrzi, hogy a halászati termékek nem jelentenek egészségügyi kockázatot életképes élősködők jelenléte szempontjából.	1. Is "hazard" as "risk" ("kockázatot")? 2. Is the translation accurate or should it actually be with "hazard" ("veszély")?
HU	hazard	53	(b) Before placing on the market fishery products referred to in points 3(c) and (d) which have not undergone the freezing treatment or which are not intended to undergo before consumption a treatment that kills viable parasites that present a health hazard, a food business operator must ensure that the fishery products originate from a fishing ground or fish farming which complies with the speci…	b) A 3. pont c) és d) alpontjában említett olyan halászati termékek forgalomba hozatalát megelőzően, amelyeken nem végeztek fagyasztási kezelést, vagy amelyeken fogyasztásuk előtt nem terveznek az egészségügyi kockázatot jelentő életképes élősködőket elpusztító kezelést végezni, az élelmiszer-ipari vállalkozónak biztosítania kell, hogy a halászati termékek olyan halászterületről vagy halgazdálkod…	1. Is "hazard" as "risk" ("kockázatot")? 2. Is the translation accurate or should it actually be with "hazard" ("veszély")?
Language	Term	Location (doc page)	English	Translation	Observation	2nd opinion
HU	risk	29	(c) heads and feet must be skinned or scalded and depilated; however, when authorised by the competent authority, visibly clean heads, not containing specified risk materials in accordance with Article 8 of Regulation (EC) No 999/2001 of the European Parliament and of the Council (2), and visibly clean feet, intended for processing into food, may be transported to and skinned or scalded and depil…	c) a fejet és a lábakat le kell nyúzni, vagy le kell forrázni és szőrteleníteni kell; ugyanakkor, ha az illetékes hatóság engedélyezi, a 999/2001/EK európai parlamenti és tanácsi rendelet (2) 8. cikke szerinti különleges fertőzési veszélyt jelentő anyagokat nem tartalmazó, láthatóan tiszta fejek, valamint az élelmiszerré történő feldolgozásra szánt, láthatóan tiszta lábak egy engedélyezett létesí…	1. Is "risk" translated as "hazard" ("veszélyt") in "risk materials"? 2. Is the translation accurate or should it actually be with "risk" ("kockázat")?
HU	risk	80	(a) bones, other than specified risk materials as defined in Article 3(1)(g) of Regulation (EC) No 999/2001 of the European Parliament and of the Council (1);	a) csontok, a 999/2001/EK európai parlamenti és tanácsi rendelet (1) 3. cikke (1) bekezdésének g) pontjában meghatározott különleges fertőzési veszélyt jelentő anyagok kivételével;	Is "risk" translated as "hazard" ("veszélyt") in "risk materials"? 2. Is the translation accurate or should it actually be with "risk" ("kockázat")?
HU	risk	81	(iii) bones other than specified risk material defined in Article 3(1)(g) of Regulation (EC) No 999/2001, hides and skins of farmed ruminant animals, pig skins, poultry skins, fish hides and wild game hides and skins that have undergone any other treatment than those specified in point (i) or (ii) and that come from establishments registered or approved pursuant to Regulation (EC) No 852/2004 or …	iii. a 999/2001/EK rendelet 3. cikke (1) bekezdésének g) pontjában meghatározott különleges fertőzést jelentő anyag kivételével csont, továbbá tenyésztett kérődzők nyersbőre és irhája, sertésbőr, baromfibőr, halbőr és vad nyersbőre és irhája, amely az i. és ii. pontban meghatározottaktól eltérő kezelésen ment át, és amely a 852/2004/EK rendelet szerint vagy e rendelettel összhangban nyilvántartás…	1. Is the word "risk" ("kockázat") missing in the Hungarian version? 2. Is the translation acceptable?
HU	risk	82	(a) all ruminant bone material derived from animals born, reared or slaughtered in countries or regions with a controlled or undetermined BSE risk in accordance with Community legislation is subjected to a process which ensures that all bone material is finely crushed and degreased with hot water and treated with dilute hydrochloric acid (at minimum concentration of 4 % and pH < 1,5) over a perio…	a) minden kérődző eredetű csontanyag, amely olyan országokban vagy régiókban született, tenyésztett vagy levágott állatból származik, amelyeket a közösségi jogszabályokkal összhangban ellenőrzött vagy határozatlan BSE-előfordulást mutató országnak vagy régiónak soroltak be, olyan eljárás alá kerül, amely biztosítja, hogy minden csontanyagot apróra összeaprítanak, forró vízzel zsírtalanítanak, és …	1. Is the word "risk" ("kockázat") missing in the Hungarian version? 2. Is the translation acceptable?
HU	risk	83	(a) bones, other than specified risk materials as defined in Article 3(1)(g) of Regulation (EC) No 999/2001;	a) csontok, a 999/2001/EK rendelet 3. cikke (1) bekezdésének g) pontjában meghatározott különleges fertőzési veszélyt jelentő anyagok kivételével;	Is "risk" translated as "hazard" ("veszélyt") in "risk materials"? 2. Is the translation accurate or should it actually be with "risk" ("kockázat")?
HU	risk	84	(i) bones other than specified risk material as defined in Article 3(1)(g) of Regulation (EC) No 999/2001 coming from establishments under the control of and listed by the competent authority, and that have been subjected to one of the following treatments:	i. a 999/2001/EK rendelet 3. cikke (1) bekezdésének g) pontjában meghatározott különleges fertőzést jelentő anyag kivételével csont, amely az illetékes hatóság ellenőrzése alatt álló és általa jegyzékbe vett létesítményekből származik, és amely átment a következő kezelések egyikén:	1. Is the word "risk" ("kockázat") missing in the Hungarian version? 2. Is the translation acceptable?
HU	risk	84	(iii) bones other than specified risk material defined in Article 3(1)(g) of Regulation (EC) No 999/2001, hides and skins of farmed ruminant animals, pig skins, poultry skins, fish hides and wild game hides and skins that have undergone any other treatment than those specified in point (i) or (ii) and that come from establishments registered or approved pursuant to Regulation (EC) No 852/2004 or …	iii. a 999/2001/EK rendelet 3. cikke (1) bekezdésének g) pontjában meghatározott különleges fertőzést jelentő anyag kivételével csont, továbbá tenyésztett kérődzők nyersbőre és irhája, sertésbőr, baromfibőr, halbőr és vad nyersbőre és irhája, amely az i. és ii. pontban meghatározottaktól eltérő kezelésen ment át, és amely a 852/2004/EK rendelet szerint vagy e rendelettel összhangban nyilvántartás…	1. Is the word "risk" ("kockázat") missing in the Hungarian version? 2. Is the translation acceptable?
HU	risk	85	(a) all ruminant bone material derived from animals born, reared or slaughtered in countries or regions with a controlled or undetermined BSE risk as determined in accordance with Article 5 of Regulation (EC) No 999/2001 is subjected to a process which ensures that all bone material is finely crushed and degreased with hot water and treated with dilute hydrochloric acid (at a minimum concentratio…	a) az olyan országokban vagy régiókban született, tenyésztett vagy levágott kérődzőből származó minden csontanyag, amelyek a 999/2001/EK rendelet 5. cikke szerint ellenőrzött vagy határozatlan BSE-előfordulást mutató országként vagy régióként vannak meghatározva, olyan folyamaton menjen át, amely biztosítja, hogy minden csontanyagot finomraőröljenek, forró vízzel zsírtalanítsanak, és legalább két…	1. Is the word "risk" ("kockázat") missing in the Hungarian version? 2. Is the translation acceptable?

## Sheet: REG 625-2017
Old version
Language	Term	Location (doc page)	English	Translation	Observation	2nd opinion
HU	hazard	2	(4) The basic Union rules with regard to food and feed law are laid down in Regulation (EC) No 178/2002 of the European Parliament and of the Council (1). In addition to those basic rules, more specific food and feed law covers different areas such as animal nutrition, including medicated feedingstuffs, food and feed hygiene, zoonoses, animal by-products, residues of veterinary medicinal products…	(4) Az élelmiszer- és takarmányjog tekintetében az alapvető uniós szabályokat a 178/2002/EK európai parlamenti és tanácsi rendelet ( 1 ) állapítja meg. Az alapvető szabályokon túlmenően a konkrétabb élelmiszer- és takarmányjog különböző területeket szabályoz, mint például a takarmányozás, ezen belül a gyógyszeres takarmányok, a takarmány- és élelmiszer-higiénia, a zoonózisok, az állati mellékterm…	1. Is the word "hazard" used to express "control and eradication of animal diseases with a human health impact" ("veszélyes")? 2. Is the translation acceptable?
HU	hazard	84	1. Member States shall ensure that the MANCP provided for in Article 109(1) is made available to the public, with the exception of those parts of the plan the disclosure of which could undermine the effectiveness of official controls.	1) A tagállamok gondoskodnak a 109. cikk (1) bekezdésében előírt többéves nemzeti ellenőrzési terv nyilvánosságra hozataláról, a terv azon részeinek kivételével, amelyek közzététele veszélyeztethetné a hatósági ellenőrzések eredményességét.	1. Is the word "hazard" used to express "undermine"("veszélyeztethetné")? 2. Is the translation acceptable?
Language	Term	Location (doc page)	English	Translation	Observation	2nd opinion
HU	risk	2	(6) Transmissible animal diseases, including by micro-organisms that have developed resistance to antimicrobials, may have a significant impact on public health, food and feed safety, and animal health and welfare. In order to ensure high standards of animal and public health in the Union, rules on animal health measures and on feed and food safety are laid down at Union level. Compliance with th…	(6) Az átvihető állatbetegségeknek, köztük az antimikrobás szerekkel szemben rezisztenssé vált mikroorganizmusok által átvihető állatbetegségeknek jelentős közegészségügyi, élelmiszer- és takarmánybiztonsági, valamint állategészségügyi és állatjóléti hatásuk lehet. Az uniós köz- és állategészségügy magas színvonalának biztosítása érdekében uniós szinten szabályok kerültek megállapításra az állate…	1. Is "threats" translated as "risks" ( "kockázatok") in "plan against the rising threats"? 2. Is the translation accurate or should it actually be with "risk" ("kockázat")?
HU	risk	9	(53) Official controls performed on animals and goods entering the Union from third countries are of key importance since these controls ensure compliance with legislation applicable within the Union and, in particular, with the rules established to protect human, animal and plant health, animal welfare and, as regards GMOs and plant protection products, also the environment. Such official contro…	(53) A harmadik országokból az Unióba beléptetett állatok és áruk tekintetében végzett hatósági ellenőrzések döntő jelentőséggel bírnak, mivel ezen ellenőrzések biztosítják, hogy a szóban forgó állatok és áruk megfeleljenek az Unióban alkalmazandó jogszabályoknak és különösen az emberi, állati és növényi egészség, illetve az állatjólét, illetve a GMO-k és növényvédő szerek vonatkozásában a környe…	1. Is risk translated as "hazard" ("veszélyeztető") in "risks to human, animal and plant health"? 2. Is the translation accurate or should it actually be with "risk" ("kockázat")?
HU	risk	9	(24) ‘risk’ means a function of the probability of an adverse effect on human, animal or plant health, animal welfare or the environment and of the severity of that effect, consequential to a hazard;	(24) „kockázat”: egy veszély következményeként jelentkező, az emberek, állatok vagy növények egészségére, az állatjólétre vagy a környezetre gyakorolt káros hatás valószínűségének és e hatás súlyosságának a szorzata;	1. Are there additional terms used in the Hungarian definition which cannot be found in English? 2. Is the translation acceptable or should it be kept without additions?
HU	risk	21	(34) ‘specified risk material’ means specified risk material as defined in point (g) of Article 3(1) of Regulation (EC) No 999/ 2001;	(34) „különleges fertőzési veszélyt jelentő anyag”: a 999/2001/EK rendelet 3. cikke (1) bekezdésének g) pontjában meghatározott különleges fertőzési veszélyt jelentő anyag;	1. Is "risk" translated as "hazard" ("veszélyt") in "risk materials"? 2. Is the translation accurate or should it actually be with "risk" ("kockázat")?
HU	risk	31	(ii) safe removal of specified risk material, and	(ii) a különleges fertőzési veszélyt jelentő anyagok biztonságos eltávolítása, valamint	1. Is "risk" translated as "hazard" ("veszélyt") in "risk materials"? 2. Is the translation accurate or should it actually be with "risk" ("kockázat")?
HU	risk	32	(v) the handling and disposal of animal by-products and of specified risk material;	(v) az állati melléktermékek és különleges fertőzési veszélyt jelentő anyagok kezelése és ártalmatlanítása;	1. Is "risk" translated as "hazard" ("veszélyt") in "risk materials"? 2. Is the translation accurate or should it actually be with "risk" ("kockázat")?
New version
Language	Term	Location (doc page)	English	Translation	Observation	2nd opinion
HU	hazard	12	3. Unless there is an overriding public interest in the disclosure of information covered by professional secrecy as referred to in paragraph 1, and without prejudice to situations where disclosure is required by Union or national legislation, such information shall include information whose disclosure would undermine:	▼B (3) Amennyiben az (1) bekezdésben említettek szerint szakmai titok tárgyát képező információ közzétételét nem indokolja magasabb rendű közérdek, továbbá azon esetek sérelme nélkül, amelyekben a közzétételt uniós vagy nemzeti jogszabály írja elő, az említett információk azok az információk, amelyek közzététele veszélyeztetné a következőket:	1. Is "undermine" translated using the word expressing "hazard" ("veszélyeztetné")? 2. Is the translation acceptable?
HU	hazard	94	1. Member States shall ensure that the MANCP provided for in Article 109(1) is made available to the public, with the exception of those parts of the plan the disclosure of which could undermine the effectiveness of official controls.	(1) A tagállamok gondoskodnak a 109. cikk (1) bekezdésében előírt többéves nemzeti ellenőrzési terv nyilvánosságra hozataláról, a terv azon részeinek kivételével, amelyek közzététele veszélyeztethetné a hatósági ellenőrzések eredményességét.	1. Is "undermine" translated using the word expressing "hazard" ("veszélyeztetné")? 2. Is the translation acceptable?
Language	Term	Location (doc page)	English	Translation	Observation	2nd opinion
HU	risk	7	(34) ‘specified risk material’ means specified risk material as defined in point (g) of Article 3(1) of Regulation (EC) No 999/ 2001;	34. „különleges fertőzési veszélyt jelentő anyag”: a 999/2001/EK rendelet 3. cikke (1) bekezdésének g) pontjában meghatározott különleges fertőzési veszélyt jelentő anyag;	1. Is "risk" translated as "hazard" ("veszélyt") in "risk materials"? 2. Is the translation accurate or should it actually be with "risk" ("kockázat")?
HU	risk	20	(ii) safe removal of specified risk material, and	ii. a különleges fertőzési veszélyt jelentő anyagok biztonságos eltávolítása, valamint	1. Is "risk" translated as "hazard" ("veszélyt") in "risk materials"? 2. Is the translation accurate or should it actually be with "risk" ("kockázat")?
HU	risk	21	(v) the handling and disposal of animal by-products and of specified risk material;	v. az állati melléktermékek és különleges fertőzési veszélyt jelentő anyagok kezelése és ártalmatlanítása;	1. Is "risk" translated as "hazard" ("veszélyt") in "risk materials"? 2. Is the translation accurate or should it actually be with "risk" ("kockázat")?

## Sheet: REG 1381-2019
Language	Term	Location (doc page)	English	Translation	Observation	2nd opinion
HU	hazard	-	-	-	-	-
Language	Term	Location (doc page)	English	Translation	Observation	2nd opinion
HU	risk	2	(7) Where there are reasonable grounds to suspect that a food or feed may present a risk for human or animal health due to non-compliance resulting from intentional violations of applicable Union law perpetrated through fraudulent or deceptive practices, public authorities, identifying to the fullest extent possible the products concerned and the risk that they may present, should inform the publ…	(7) Minden olyan esetben, amikor fennáll az alapos gyanúja annak, hogy egy élelmiszer vagy takarmány – az alkalmazandó uniós jog csalárd vagy megtévesztő gyakorlat útján elkövetett szándékos megsértéséből eredő meg nem felelés miatt – veszélyt jelenthet az emberek vagy az állatok egészségére, a hatóságoknak a lehető leghamarabb megfelelően tájékoztatniuk kell erről a nyilvánosságot, a lehető legp…	1. Is risk translated using the word for hazard ("veszélyt") in "the risk that they may present, should inform the public accordingly as soon as possible." 2. Is the translation accurate or should it actually be with "risk" ("kockázat")?
