# Supplementary material for: Food Risk Analysis: Towards a Better Understanding of „Hazard” and „Risk” in EU food legislation
Source: Preprints.org preprint supplement (doi:10.20944/preprints202306.1556.v1), 2023-06-21
Supplement: Supplementary file 17 [file IT.xlsx]

## Sheet: REG 178-2002
Old version
Language	Term	Location (doc page)	English	Translation	Observation	EU-FORA fellow reply
IT	hazard	8	‘hazard’ means a biological, chemical or physical agent in, or condition of, food or feed with the potential to cause an adverse health effect;	«pericolo» o «elemento di pericolo», agente biologico, chimico o fisico contenuto in un alimento o mangime, o condizione in cui un alimento o un mangime si trova, in grado di provocare un effetto nocivo sulla salute;	I "hazard" translated as "pericolo" and also "elemento di pericolo"? Is this an addition in the Italian version? Is the translation acceptable?
IT	hazard	3	(28) Experience has shown that the functioning of the internal market in food or feed can be jeopardised where it is impossible to trace food and feed. It is therefore necessary to establish a comprehensive system of traceability within food and feed businesses so that targeted and accurate withdrawals can be undertaken or information given to consumers or control officials, thereby avoiding the …	(28) L'esperienza ha dimostrato che l'impossibilità di ricostruire il percorso compiuto da alimenti e mangimi può mettere in pericolo il funzionamento del mercato interno di tali prodotti. Occorre quindi predisporre un sistema generale per la rintracciabilità dei prodotti che abbracci il settore dei mangimi e alimentare, onde poter procedere a ritiri mirati e precisi o fornire informazioni ai con…	Is "jeoperdised" translated with the word for "hazard" with the meaning of "put in danger" ("mettere in pericolo")? Is "food safety problems" translated with the word for "hazard" with the meaning of "danger to food safety" ("sicurezza degli alimenti sia in pericolo")? Are the translations acceptable?
Language	Term	Location (doc page)	English	Translation	Observation	EU-FORA fellow reply
IT	risk	1	(6) Water is ingested directly or indirectly like other foods, thereby contributing to the overall exposure of a consumer to ingested substances, including chemical and microbiological contaminants. However, as the quality of water intended for human consumption is already controlled by Council Directives 80/778/EEC (5) and 98/ 83/EC (6), it suffices to consider water after the point of complianc…	(6) L'acqua viene ingerita, come ogni altro alimento, direttamente o indirettamente, contribuendo così al rischio complessivo al quale si espongono i consumatori attraverso l'ingestione di sostanze, tra cui contaminanti chimici e microbiologici. Tuttavia, dato che la qualità delle acque destinate al consumo umano è già disciplinata dalle direttive del Consiglio 80/778/CEE (5) e 98/83/ CE(6), è su…	Is "exposure" translated as "risk" ("rischio") in "overall exposure"? Is the translation acceptable?
IT	risk	3	(24) It is necessary to ensure that food and feed exported or re-exported from the Community complies with Community law or the requirements set up by the importing country. In other circumstances, food and feed can only be exported or re-exported if the importing country has expressly agreed. However, it is necessary to ensure that even where there is agreement of the importing country, food inj…	(24) Occorre assicurare che gli alimenti e i mangimi esportati o riesportati dalla Comunità siano conformi alla normativa comunitaria o ai requisiti stabiliti dal paese importatore. In altre circostanze detti alimenti e mangimi possono essere esportati o riesportati soltanto a condizione che il paese importatore vi abbia acconsentito espressamente. Tuttavia, anche qualora lo Stato importatore abb…	Is "injurious" translated as "risk"("rischio") in "injurious to health"? Is the translation acceptable?
IT	risk	9	In other circumstances, except in the case where foods are injurious to health or feeds are unsafe, food and feed can only be exported or re-exported if the competent authorities of the country of destination have expressly agreed, after having been fully informed of the reasons for which and the circumstances in which the food or feed concerned could not be placed on the market in the Community.	In altre circostanze, ad eccezione del caso in cui gli alimenti siano dannosi per la salute o i mangimi siano a rischio, detti alimenti e mangimi possono essere esportati o riesportati soltanto qualora le autorità competenti del paese di destinazione vi abbiano acconsentito espressamente, dopo essere state pienamente informate dei motivi e delle circostanze per cui non è stato possibile immettere…	Is "unsafe" translated as "risk"? Is the translation acceptable?
IT	risk	10	1. Food shall not be placed on the market if it is unsafe.	1. Gli alimenti a rischio non possono essere immessi sul mercato.	Is "unsafe" translated as "at risk"? Is the translation acceptable?
IT	risk	10	2. Food shall be deemed to be unsafe if it is considered to be	2. Gli alimenti sono considerati a rischio nei casi seguenti:	Is "unsafe" translated as "at risk"? Is the translation acceptable?
IT	risk	10	3. In determining whether any food is unsafe, regard shall be had:	3. Per determinare se un alimento sia a rischio occorre prendere in considerazione quanto segue:	Is "unsafe" translated as "at risk"? Is the translation acceptable?
IT	risk	10	1. Feed shall not be placed on the market or fed to any foodproducing animal if it is unsafe.	1. I mangimi a rischio non possono essere immessi sul mercato né essere somministrati a un animale destinato alla produzione alimentare.	Is "unsafe" translated as "at risk"? Is the translation acceptable?
IT	risk	10	2. Feed shall be deemed to be unsafe for its intended use if it is considered to:	2. I mangimi sono considerati a rischio, per l'uso previsto, nei casi seguenti:	Is "unsafe" translated as "at risk"? Is the translation acceptable?
IT	risk	10	— make the food derived from food-producing animals unsafe for human consumption.	— se rendono a rischio, per il consumo umano, l'alimento ottenuto dall'animale destinato alla produzione alimentare.	Is "unsafe" translated as "at risk"? Is the translation acceptable?
New version
Language	Term	Location (doc page)	English	Translation	Observation	EU-FORA fellow reply
IT	hazard	4	‘hazard’ means a biological, chemical or physical agent in, or condition of, food or feed with the potential to cause an adverse health effect;	«pericolo» o «elemento di pericolo», agente biologico, chimico o fisico contenuto in un alimento o mangime, o condizione in cui un alimento o un mangime si trova, in grado di provocare un effetto nocivo sulla salute;	I "hazard" translated as "pericolo" and also "element of hazard" ("elemento di pericolo")? Is this an addition in the Italian version? Is this an acceptable addition?
Language	Term	Location (doc page)	English	Translation	Observation	EU-FORA fellow reply
IT	risk	9	In other circumstances, except in the case where foods are injurious to health or feeds are unsafe, food and feed can only be exported or re_x0002_exported if the competent authorities of the country of destination have expressly agreed, after having been fully informed of the reasons for which and the circumstances in which the food or feed concerned could not be placed on the market in the Comm…	In altre circostanze, ad eccezione del caso in cui gli alimenti siano dannosi per la salute o i mangimi siano a rischio, detti alimenti e mangimi possono essere esportati o riesportati soltanto qualora le autorità competenti del paese di destinazione vi abbiano acconsentito espressamente, dopo essere state pienamente informate dei motivi e delle circostanze per cui non è stato possibile immettere…	Is "unsafe" translated as "at risk" ("a rischi")? Is the translation acceptable?
IT	risk	10	1. Food shall not be placed on the market if it is unsafe.	1. Gli alimenti a rischio non possono essere immessi sul mercato.	Is it correctly translated? Is "unsafe" translated as "at risk"? Is the translation acceptable?
IT	risk	10	2. Food shall be deemed to be unsafe if it is considered to be	2. Gli alimenti sono considerati a rischio nei casi seguenti:	Is it correctly translated? Is "unsafe" translated as "at risk"? Is the translation acceptable?
IT	risk	10	3. In determining whether any food is unsafe, regard shall be had:	3. Per determinare se un alimento sia a rischio occorre prendere in considerazione quanto segue:	Is it correctly translated? Is "unsafe" translated as "at risk"? Is the translation acceptable?
IT	risk	11	1. Feed shall not be placed on the market or fed to any foodproducing animal if it is unsafe.	1. I mangimi a rischio non possono essere immessi sul mercato né essere somministrati a un animale destinato alla produzione alimentare.	Is it correctly translated? Is "unsafe" translated as "at risk"? Is the translation acceptable?
IT	risk	11	2. Feed shall be deemed to be unsafe for its intended use if it is considered to:	2. I mangimi sono considerati a rischio, per l'uso previsto, nei casi seguenti:	Is it correctly translated? Is "unsafe" translated as "at risk"? Is the translation acceptable?
IT	risk	11	make the food derived from food-producing animals unsafe for human consumption	se rendono a rischio, per il consumo umano, l'alimento ottenuto dall'animale destinato alla produzione alimentare.	Is it correctly translated? Is "unsafe" translated as "at risk"? Is the translation acceptable?

## Sheet: REG 852-2004
Old version
Language	Term	Location (doc page)	English	Translation	Observation	EU-FORA fellow reply
IT	hazard	15	(b) identifying the critical control points at the step or steps at which control is essential to prevent or eliminate a hazard or to reduce it to acceptable levels;	b) identificare i punti critici di controllo nella fase o nelle fasi in cui il controllo stesso si rivela essenziale per prevenire o eliminare un rischio o per ridurlo a livelli accettabili;	Is "hazard" translated as "risk" ("rischio") in "eliminate a hazard"?
IT	hazard	16	(c) establishing critical limits at critical control points which separate acceptability from unacceptability for the prevention, elimination or reduction of identified hazards;	c) stabilire, nei punti critici di controllo, i limiti critici che differenziano l'accettabilità e l'inaccettabilità ai fini della prevenzione, eliminazione o riduzione dei rischi identificati;	Is "hazard" translated as "risk" ("rischio") in "identified hazards"?
IT	hazard	32	3. Notwithstanding the general duty laid down in paragraph 2, food business operators are to comply with appropriate Community and national legislative provisions relating to the control of hazards in primary production and associated operations, including:	3. Fatto salvo l'obbligo generale di cui al punto 2 gli operatori del settore alimentare devono rispettare le pertinenti disposizioni legislative comunitarie e nazionali relative al controllo dei rischi nella produzione primaria e nelle operazioni associate, comprese:	Is "hazard" translated as "risk" ("rischio") in "control of hazards"?
IT	hazard	37	1. National and Community guides referred to in Articles 7 to 9 of this Regulation should contain guidance on good hygiene practice for the control of hazards in primary production and associated operations	1. I manuali nazionali o comunitari di cui agli articoli da 7 a 9 del presente regolamento dovrebbero contenere orientamenti per una corretta prassi igienica ai fini del controllo dei rischi nella produzione primaria e nelle operazioni associate	Is "hazards" translated as "risk" ("rischi") in "control of hazards"?
Language	Term	Location (doc page)	English	Translation	Observation	EU-FORA fellow reply
IT	risk	-	-	-	-	-
New version
Language	Term	Location (doc page)	English	Translation	Observation	EU-FORA fellow reply
IT	hazard	5	(b) identifying the critical control points at the step or steps at which control is essential to prevent or eliminate a hazard or to reduce it to acceptable levels;	b) identificare i punti critici di controllo nella fase o nelle fasi in cui il controllo stesso si rivela essenziale per prevenire o eliminare un rischio o per ridurlo a livelli accettabili;	Is "hazard" translated as "risk" ("rischio")?
IT	hazard	5	(c) establishing critical limits at critical control points which separate acceptability from unacceptability for the prevention, elimination or reduction of identified hazards;	c) stabilire, nei punti critici di controllo, i limiti critici che differenziano l'accettabilità e l'inaccettabilità ai fini della prevenzione, eliminazione o riduzione dei rischi identificati;	Is "hazard" translated as "risk" ("rischio")?
IT	hazard	14	3. Notwithstanding the general duty laid down in paragraph 2, food business operators are to comply with appropriate Community and national legislative provisions relating to the control of hazards in primary production and associated operations, including:	3. Fatto salvo l'obbligo generale di cui al punto 2 gli operatori del settore alimentare devono rispettare le pertinenti disposizioni legislative comunitarie e nazionali relative al controllo dei rischi nella produzione primaria e nelle operazioni associate, comprese:	Is "hazard" translated as "risk" ("rischio")?
IT	hazard	16	1. National and Community guides referred to in Articles 7 to 9 of this Regulation should contain guidance on good hygiene practice for the control of hazards in primary production and associated operations	1. I manuali nazionali o comunitari di cui agli articoli da 7 a 9 del presente regolamento dovrebbero contenere orientamenti per una corretta prassi igienica ai fini del controllo dei rischi nella produzione primaria e nelle operazioni associate	Is "hazards" translated as "risk" ("rischi")?
Language	Term	Location (doc page)	English	Translation	Observation	EU-FORA fellow reply
IT	risk	-	-	-	-	-

## Sheet: REG 853-2004
Old version
Language	Term	Location (doc page)	English	Translation	Observation	EU-FORA fellow reply
IT	hazard	2	(2) Certain foodstuffs may present specific hazards to human health, requiring the setting of specific hygiene rules. This is particularly the case for food of animal origin, in which microbiological and chemical hazards have frequently been reported.	(2) Alcuni prodotti alimentari possono presentare rischi specifici per la salute umana, che richiedono l'applicazione di specifiche norme in materia di igiene. Ciò vale in particolar modo per gli alimenti di origine animale, nei quali sono spesso stati segnalati rischi microbiologici e chimici	Is "hazards" translated as "risks" ("rischi") in "microbiological and chemical hazards"?
IT	hazard	8	(22) In order to ensure proper inspection of hunted wild game placed on the Community market, bodies of hunted animals and their viscera should be presented for official post-mortem inspection at a game-handling establishment. However, to preserve certain hunting traditions without prejudicing food safety, it is appropriate to provide for training for hunters who place wild game on the market for…	(22) Al fine di assicurare un’adeguata ispezione della selvaggina selvatica oggetto di attività venatorie immessa nel mercato della Comunità, le carcasse di animali oggetto di detta attività e relativi visceri sono presentati presso un centro di lavorazione della selvaggina per un'ispezione post mortem ufficiale. Tuttavia, per conservare talune tradizioni venatorie senza pregiudicare la sicurezza…	Is "hazards" translated as "risks" ("rischi") in "no anomalies or hazards"?
IT	hazard	26	(c) explain the reasons for the adaptation, including, where relevant, by providing a summary of the hazard analysis carried out and any measures to be taken to ensure that the adaptation will not compromise the objectives of this Regulation; and	c) esporre le motivazioni degli adattamenti (se del caso, fornendo anche una sintesi dell'analisi del rischio effettuata e indicando le eventuali misure da adottare per garantire che l'adattamento non pregiudichi gli obiettivi del presente regolamento); e	Is "hazard" translated as "risk" ("rischio") in "hazard analysis"?
IT	hazard	28	8) to specify criteria for determining when epidemiological data indicate that a fishing ground does not present a health hazard with regard to the presence of parasites and, consequently, for determining when the competent authority may authorise food business operators not to freeze fishery products in accordance with Annex III, Section VIII, Chapter III, Part D;	8) per specificare criteri volti a determinare quando i dati epidemiologici indicano che una zona di pesca non presenta rischi sanitari con riguardo alla presenza di parassiti e, di conseguenza, quando l'autorità competente può autorizzare gli operatori del settore alimentare a non congelare i prodotti della pesca a norma dell'allegato III, sezione VIII, capitolo III, parte D;	Is "hazard" translated as "risk" ("rischi") in "health hazard"?
IT	hazard	43	1. Food business operators operating slaughterhouses must ensure that the procedures that they have put in place in accordance with the general requirements of Article 5 of Regulation (EC) No …/2004 ∗ meet the requirements that the hazard analysis shows to be necessary and the specific requirements listed in paragraph 2.	1. Gli operatori del settore alimentare che gestiscono i macelli devono assicurare che le procedure da essi messe in atto conformemente ai requisiti generali di cui all’articolo 5 del regolamento (CE) n. .../2004 * soddisfino i requisiti che l’analisi di rischio riveli necessari e gli specifici requisiti elencati nel punto 2.	Is "hazard" translated as "risk" ("rischio") in "hazard analysis"?
IT	hazard	114	(a) epidemiological data are available indicating that the fishing grounds of origin do not present a health hazard with regard to the presence of parasites; and	a) i dati epidemiologici disponibili indichino che le zone di pesca d'origine non presentano rischi sanitari con riguardo alla presenza di parassiti;	Is "hazard" translated as "risk" ("rischio") in "health hazard"?
IT	hazard	134	5. After breaking, each particle of the egg product must undergo processing as quickly as possible to eliminate microbiological hazards or to reduce them to an acceptable level. A batch that has been insufficiently processed may immediately undergo processing again in the same establishment, if this processing renders it fit for human consumption. When a batch is found to be unfit for human consu…	5. dopo la rottura delle uova, ogni particella degli ovoprodotti deve essere sottoposta al più presto a una trasformazione allo scopo di eliminare i rischi microbiologici o di ridurli a un livello accettabile; una partita la cui trasformazione sia stata insufficiente può essere sottoposta immediatamente a una nuova trasformazione nel medesimo stabilimento, purché venga resa così idonea al consumo…	Is "hazards" translated as "risks" ("rischi") in " microbiological hazards"?
Language	Term	Location (doc page)	English	Translation	Observation	EU-FORA fellow reply
IT	risk	8	(23) This Regulation should establish criteria for raw milk pending the adoption of new requirements for its placing on the market. These criteria should be trigger values, implying that, in the event of any overshooting, food business operators are to take corrective action and to notify the competent authority. The criteria should not be maximum figures beyond which raw milk cannot be placed on…	(23) Il presente regolamento dovrebbe stabilire criteri per il latte crudo in attesa dell'adozione di nuovi requisiti per l'immissione del latte crudo sul mercato. Tali criteri dovrebbero consistere in valori limite, il che implica che, nell'eventualità di un superamento, gli operatori del settore alimentare devono adottare misure correttive e segnalarlo all'autorità competente. I criteri non dov…	Is the word "risk" ("rischi") used for expressing "can safely be used for human consumption" in the Italian version? Is the translation acceptable?
IT	risk	108	3. Fishery products must be handled and stored so as to prevent bruising. Handlers may use spiked instruments to move large fish or fish which might injure them, provided that the flesh of the products suffers no damage.	3. I prodotti della pesca devono essere manipolati e conservati evitandone danneggiamenti. Gli operatori possono utilizzare strumenti pungenti per spostare pesci di grande taglia o pesci che comportano un rischio di ferimento per gli operatori stessi, purché le carni dei prodotti in questione non debbano subire danneggiamenti.	Is the word "risk" ("rischi") used for expressing "might injure" in the Italian version? Is the translation acceptable?
IT	risk	108	6. Where fish are headed and/or gutted on board, such operations must be carried out hygienically as soon as possible after capture, and the products must be washed immediately and thoroughly with potable water or clean water. In that event, the viscera and parts that may constitute a danger to public health must be removed as soon as possible and kept apart from products intended for human consu…	6. Quando i pesci sono decapitati e/o eviscerati a bordo, tali operazioni devono essere effettuate, nel rispetto delle norme igieniche, appena possibile dopo la cattura e i prodotti devono essere immediatamente e abbondantemente lavati con acqua potabile o acqua pulita. In tal caso, i visceri e le parti che possono costituire un pericolo per la salute pubblica vengono rimossi appena possibile e t…	Is "danger" translated using the word for "hazard" ("pericolo")? Should there be a differentiation between danger and hazard?
New version
Language	Term	Location (doc page)	English	Translation	Observation	EU-FORA fellow reply
IT	hazard	11	(i) the criteria for determining when epidemiological data indicate that a fishing ground does not present a health hazard with regard to the presence of parasites and, consequently, for determining when the competent authority may authorise food business operators not to freeze fishery products in accordance with Annex III, Section VIII, Chapter III, Part D;	i) i criteri volti a determinare quando i dati epidemiologici indicano che una zona di pesca non presenta rischi sanitari con riguardo alla presenza di parassiti e, di conseguenza, quando l’autorità competente può autorizzare gli operatori del settore alimentare a non congelare i prodotti della pesca a norma dell’allegato III, sezione VIII, capitolo III, parte D;	Is "hazard translated as "risk" ("rischi") in "health hazard"?
IT	hazard	12	(c) explain the reasons for the adaptation, including, where relevant, by providing a summary of the hazard analysis carried out and any measures to be taken to ensure that the adaptation will not compromise the objectives of this Regulation;	c) esporre le motivazioni degli adattamenti (se del caso, fornendo anche una sintesi dell'analisi del rischio effettuata e indicando le eventuali misure da adottare per garantire che l'adattamento non pregiudichi gli obiettivi del presente regolamento);	Is "hazard translated as "risk" ("rischi") in "hazard analysis"?
IT	hazard	21	1. Food business operators operating slaughterhouses must ensure that the procedures that they have put in place in accordance with the general requirements of Article 5 of Regulation (EC) No 852/2004 meet the requirements that the hazard analysis shows to be necessary and the specific requirements listed in point 2.	1. Gli operatori del settore alimentare che gestiscono i macelli devono assicurare che le procedure da essi messe in atto conformemente ai requisiti generali di cui all’articolo 5 del regolamento (CE) n. 852/2004 soddisfino i requisiti che l’analisi di rischio riveli necessari e gli specifici requisiti elencati nel punto 2.	Is "hazard translated as "risk" ("rischi") in "hazard analysis"?
IT	hazard	53	(i) there are epidemiological data available indicating that the fishing grounds of origin do not present a health hazard with regard to the presence of parasites; and	i) esistano dati epidemiologici indicanti che le zone di pesca d’origine non presentano rischi sanitari con riguardo alla presenza di parassiti; e	Is "hazard translated as "risk" ("rischi") in "health hazard"?
IT	hazard	53	(d) derived from fish farming, cultured from embryos and have been fed exclusively on a diet that cannot contain viable parasites that present a health hazard, and one of the following requirements is complied with:	d) derivati da piscicoltura, da colture di embrioni e nutriti esclusivamente secondo una dieta priva di parassiti vivi che rappresentano un rischio sanitario, e purché uno dei seguenti requisiti sia soddisfatto:	Is "hazard translated as "risk" ("rischi") in "health hazard"?
IT	hazard	53	(ii) the food business operator verifies through procedures, approved by the competent authority, that the fishery products do not represent a health hazard with regard to the presence of viable parasites.	ii) l’operatore del settore alimentare verifica mediante procedure approvate dall’autorità competente che i prodotti della pesca non rappresentano un rischio sanitario con riguardo alla presenza di parassiti vivi.	Is "hazard translated as "risk" ("rischi") in "health hazard"?
IT	hazard	53	(b) Before placing on the market fishery products referred to in points 3(c) and (d) which have not undergone the freezing treatment or which are not intended to undergo before consumption a treatment that kills viable parasites that present a health hazard, a food business operator must ensure that the fishery products originate from a fishing ground or fish farming which complies with the speci…	b) Prima dell’immissione sul mercato dei prodotti di cui al punto 3, lettere c) e d), che non sono stati sottoposti al trattamento di congelamento o che non sono destinati ad essere sottoposti ad un trattamento, prima del consumo, volto ad uccidere i parassiti vivi che rappresentano un rischio sanitario, un operatore del settore alimentare deve assicurarsi che i prodotti della pesca in questione …	Is "hazard translated as "risk" ("rischi") in "health hazard"?
IT	hazard	77	5. After breaking, each particle of the liquid egg must undergo processing as quickly as possible to eliminate microbiological hazards or to reduce them to an acceptable level. A batch that has been insufficiently processed may immediately undergo processing again in the same establishment if this processing renders it fit for human consumption. Where a batch is found to be unfit for human consum…	5. dopo la rottura, ogni particella dell'uovo liquido deve essere sottoposta al più presto a una trasformazione allo scopo di eliminare i rischi microbiologici o di ridurli a un livello accettabile; una partita la cui trasformazione sia stata insufficiente può essere sottoposta immediatamente a una nuova trasformazione nel medesimo stabilimento, purché venga resa così idonea al consumo umano; qua…	Is "hazards" translated as "risks" ("rischi") in "microbiological hazards"?
Language	Term	Location (doc page)	English	Translation	Observation	EU-FORA fellow reply
IT	risk	42	However, the competent authority may authorise that heads of animals susceptible to Trichinella infestation be sent to a technical plant for the production of game trophies, which has been approved in accordance with Article 18 of Regulation (EC) No 1774/2002. The technical plant shall be indicated in the declaration of the trained person. A copy of that declaration shall be sent to the technical…	Tuttavia, l’autorità competente può autorizzare la spedizione di teste di animali a rischio di contaminazione da Trichine a un centro tecnico per la produzione di trofei di caccia, riconosciuto a norma dell’articolo 18 del regolamento (CE) n. 1774/2002. L’impianto tecnico deve essere specificato nella dichiarazione della persona formata. Una copia della dichiarazione è inviata all’impianto tecnic…	Is the word "risk" ("rischio") used for expressing "susceptible to" in the Italian version? Is the translation acceptable?

## Sheet: REG 625-2017
Old version
Language	Term	Location (doc page)	English	Translation	Observation	EU-FORA fellow reply
IT	risk	2	(6) Transmissible animal diseases, including by micro-organisms that have developed resistance to antimicrobials, may have a significant impact on public health, food and feed safety, and animal health and welfare. In order to ensure high standards of animal and public health in the Union, rules on animal health measures and on feed and food safety are laid down at Union level. Compliance with th…	(6) Le malattie animali trasmissibili, comprese quelle causate da microrganismi che sono diventati resistenti agli antimicrobici, possono avere un impatto significativo sulla sanità pubblica, sulla sicurezza degli alimenti e dei mangimi nonché sulla salute e sul benessere degli animali. Al fine di garantire livelli elevati di salute animale e di sanità pubblica nell’Unione, sono stabilite a livel…	Is "threats" translated as "risks" ("rischi") in "threats from Antimicrobial Resistance"?
IT	hazard	15	an assessment of procedures on good manufacturing practices, good hygiene practices, good farming practices, and of procedures based on the principles of hazard analysis critical control points (HACCP);	la valutazione delle procedure in materia di buone prassi di fabbricazione, di corrette prassi igieniche, di buone prassi agricole e delle procedure basate sui principi dell’analisi dei rischi e dei punti critici di controllo (HACCP);	Is "hazard" translated as "risk" ("rischi") in "hazard analysis"?
IT	hazard	44	2. Where relevant, appropriate and technically feasible, having regard in particular to the prevalence and distribution of the hazard in the animals or goods, to the perishability of the samples or the goods and to the amount of available substrate, the competent authorities shall:	2. Se opportuno, pertinente e tecnicamente fattibile, in particolare in considerazione della diffusione e della distribuzione del rischio negli animali o nelle merci, della deperibilità dei campioni o delle merci e del quantitativo di substrato disponibile, l’autorità competente:	Is "hazard" translated as risk ("riscchio") in "hazard in animals"?
Language	Term	Location (doc page)	English	Translation	Observation	EU-FORA fellow reply
IT	risk	88	(viii) the secretariat of the Cartagena Protocol on Biosafety to the Convention on Biological Biodiversity;	viii) il segretariato del protocollo di Cartagena sulla prevenzione dei rischi biotecnologici relativo alla convenzione sulla diversità biologica;	Is there an addition ("sulla prevenzione dei rischi biotecnologici relativo") in the Italian version? Should it be translated as "la segreteria del Protocollo di Cartagena sulla Biosicurezza alla Convenzione sulla diversità biologica" or in another way?
New version
Language	Term	Location (doc page)	English	Translation	Observation	EU-FORA fellow reply
IT	hazard	18	(d) an assessment of procedures on good manufacturing practices, good hygiene practices, good farming practices, and of procedures based on the principles of hazard analysis critical control points (HACCP);	d) la valutazione delle procedure in materia di buone prassi di fabbricazione, di corrette prassi igieniche, di buone prassi agricole e delle procedure basate sui principi dell’analisi dei rischi e dei punti critici di controllo (HACCP);	Is "hazard" translated as "risk" ("rischio") in "hazard analysis"?
IT	hazard	39	2. Where relevant, appropriate and technically feasible, having regard in particular to the prevalence and distribution of the hazard in the animals or goods, to the perishability of the samples or the goods and to the amount of available substrate, the competent authorities shall:	2. Se opportuno, pertinente e tecnicamente fattibile, in particolare in considerazione della diffusione e della distribuzione del rischio negli animali o nelle merci, della deperibilità dei campioni o delle merci e del quantitativo di substrato disponibile, l’autorità competente:	Is "hazard" translated as risk ("rischio") in "distribution of hazard"?
Language	Term	Location (doc page)	English	Translation	Observation	EU-FORA fellow reply
IT	risk	100	(viii) the secretariat of the Cartagena Protocol on Biosafety to the Convention on Biological Biodiversity;	viii) il segretariato del protocollo di Cartagena sulla prevenzione dei rischi biotec	Is there an addition to the Italian version? Should it be "la segreteria del Protocollo di Cartagena sulla Biosicurezza alla Convenzione sulla diversità biologica" or in another way? Is this translation acceptable?

## Sheet: REG 1381-2019
Single version
Language	Term	Location (doc page)	English	Translation	Observation	EU-FORA fellow reply
IT	hazard	-	-	-	-
Language	Term	Location (doc page)	English	Translation	Observation	EU-FORA fellow reply
IT	risk	26	3. Upon request of a notifier, the competent authority may grant confidential treatment only with respect to the following items of information, upon verifiable justification, where the disclosure of such information is demonstrated by the notifier to potentially harm its interests to a significant degree:	3. Su richiesta di un notificante, l'autorità competente può accordare un trattamento riservato solo per le seguenti informazioni, su presentazione di una giustificazione verificabile, qualora il notificante dimostri che la loro divulgazione rischia di danneggiare i suoi interessi in maniera significativa:	Is "potentially harm" translated using the word for "risk" ("rischia di danneggiare")?
