# Supplementary material for: Food Risk Analysis: Towards a Better Understanding of „Hazard” and „Risk” in EU food legislation
Source: Preprints.org preprint supplement (doi:10.20944/preprints202306.1556.v1), 2023-06-21
Supplement: Supplementary file 18 [file LT.xlsx]

## Sheet: REG 178-2002
Old version
Language	Term	Location (doc page)	English	Translation	Observation	EFSA Focal Point
LT	hazard	15	(f) the Panel on biological hazards;	f) biologinės rizikos specialistų grupė;	Is "hazards" translated as "risks" ("riscos") in "biological hazards"?
LT	hazard	18	Rapid alert system	Skubaus įspėjimo apie pavojų sistema	Is "Rapid system alert" translated as "hazard system" ("pavojų sistema")? Is the translation acceptable?
LT	hazard	18	To enable it to perform its task of monitoring the health and nutritional risks of foods as effectively as possible, the Authority shall be the recipient of any messages forwarded via the rapid alert system. It shall analyse the content of such messages with a view to providing the Commission and the Member States with any information required for the purposes of risk analysis.	Kad tarnyba galėtų kuo veiksmingiau kontroliuoti maisto produktų riziką sveikatai ir mitybai, ji turi gauti visus pranešimus, siunčiamus per skubaus įspėjimo apie pavojų sistemą. Ji nagrinėja tokių žinučių turinį, kad galėtų suteikti Komisijai ir valstybėms narėms visą rizikos analizei reikalingą informaciją.	Is "Rapid system alert" translated as "hazard system" ("pavojų sistema")? Is the translation acceptable?
LT	hazard	21	Rapid alert system	Skubaus įspėjimo apie pavojų sistema	Is "Rapid system alert" translated as "hazard system" ("pavojų sistema")? Is the translation acceptable?
LT	hazard	21	3. Without prejudice to other Community legislation, the Member States shall immediately notify the Commission under the rapid alert system of:	3. Nepažeisdamos kitų Bendrijos teisės aktų, valstybės narės skubaus įspėjimo apie pavojų sistema tuoj pat praneša Komisijai apie:	Is "prejudice" translated using the word for "hazard" ("pavojų")? Is the translation acceptable?
LT	hazard	21	4. Where a food or feed which has been the subject of a notification under the rapid alert system has been dispatched to a third country, the Commission shall provide the latter with the appropriate information.	4. Kai maistas arba pašarai, apie kuriuos buvo pranešta skubaus įspėjimo apie pavojų sistema, yra išsiųsti į trečiąją šalį, Komisija tai šaliai suteikia atitinkamą informaciją.	Is "Rapid system alert" translated as "hazard system" ("pavojų sistema")? Is the translation acceptable?
LT	hazard	21	5. The Member States shall immediately inform the Commission of the action implemented or measures taken following receipt of the notifications and supplementary information transmitted under the rapid alert system. The Commission shall immediately transmit this information to the members of the network.	5. Valstybė narė tuoj pat informuoja Komisiją apie veiksmus bei priemones, kurių buvo imtasi skubaus įspėjimo apie pavojų sistema gavus pranešimus ir papildomą informaciją. Komisija nedelsdama perduoda šią informaciją tinklo nariams.	Is "Rapid system alert" translated as "hazard system" ("pavojų sistema")? Is the translation acceptable?
LT	hazard	21	6. Participation in the rapid alert system may be opened up to applicant countries, third countries or international organisations, on the basis of agreements between the Community and those countries or international organisations, in accordance with the procedures defined in those agreements. The latter shall be based on reciprocity and shall include confidentiality measures equivalent to those…	6. Remiantis Bendrijos ir minėtų šalių bei tarptautinių organizacijų sutartimis bei jose nustatyta tvarka, skubaus įspėjimo apie pavojų sistemoje gali dalyvauti šalys pareiškėjos, trečiosios šalys arba tarptautinės organizacijos. Minimos sutartys yra grindžiamos abipusiškumu ir apima konfidencialumo priemones, lygiavertes Bendrijoje taikytinoms priemonėms.	Is "Rapid system alert" translated as "hazard system" ("pavojų sistemoje")? Is the translation acceptable?
LT	hazard	21	Confidentialityrules for the rapid alert system	Skubaus įspėjimo apie pavojų sistemai taikytinos konfidencialumo taisyklės	Is "Rapid system alert" translated as "hazard system" ("pavojų sistemoje")? Is the translation acceptable?
Language	Term	Location (doc page)	English	Translation	Observation	EFSA Focal Point
LT	risk	2	(17) Where food law is aimed at the reduction, elimination or avoidance of a risk to health, the three interconnected components of risk analysis — risk assessment, risk management, and risk communication — provide a systematic methodology for the determination of effective, proportionate and targeted measures or other actions to protect health.	(17) Maisto produktus reglamentuojančiais įstatymais siekiant sumažinti ar pašalinti pavojų sveikatai arba jo išvengti, trys tarpusavyje susiję rizikos analizės komponentai – rizikos įvertinimas, rizikos valdymas ir pranešimas apie riziką – sudaro sisteminį metodą, kuriuo galima nustatyti veiksmingas, proporcingas ir tikslingas priemones ar kitus veiksmus sveikatai apsaugoti	Is "risk" translated as "hazard" ("pavojų") in "risk to health"?
LT	risk	2	(21) In those specific circumstances where a risk to life or health exists but scientific uncertainty persists, the precautionary principle provides a mechanism for determining risk management measures or other actions in order to ensure the high level of health protection chosen in the Community.	(21) Ypatingomis aplinkybėmis, kai kyla pavojus gyvybei arba sveikatai, atsargumo principas numato rizikos valdymo priemonių arba kitų veiksmų nustatymo mechanizmą tam, kad būtų užtikrintas Bendrijos pasirinktas aukštas sveikatos apsaugos lygis.	Is "risk" translated as "hazard" ("pavojus") in "risk to life"?
LT	risk	2	(22) Food safety and the protection of consumer's interests is of increasing concern to the general public, non-governmental organisations, professional associations, international trading partners and trade organisations. It is necessary to ensure that consumer confidence and the confidence of trading partners is secured through the open and transparent development of food law and through public…	(22) Visuomenei, nevyriausybinėms organizacijoms, profesiniams susivienijimams, tarptautinės prekybos partneriams ir prekybos organizacijoms vis labiau rūpi maisto sauga ir vartotojų interesų apsauga. Būtina užtikrinti, kad vartotojų ir prekybos partnerių pasitikėjimas būtų išlaikytas atvirai ir skaidriai tobulinant maisto įstatymą ir visuomeninių institucijų, kurios imasi atitinkamų priemonių in…	Is "risk" translated as "hazard" ("pavojingas") in "risk to health"?
LT	risk	3	(28) Experience has shown that the functioning of the internal market in food or feed can be jeopardised where it is impossible to trace food and feed. It is therefore necessary to establish a comprehensive system of traceability within food and feed businesses so that targeted and accurate withdrawals can be undertaken or information given to consumers or control officials, thereby avoiding the …	(28) Patirtis parodė, kad maisto produktų ir pašarų vidaus rinkos veikimui gali kilti pavojus, jei maisto bei pašarų neįmanoma atsekti. Todėl būtina nustatyti visapusio atsekamumo maisto ir pašarų versle sistemą, kad būtų galima taikyti tikslinius ir tikslius išėmimus iš apyvartos arba suteikti informaciją vartotojams ar kontroliuojantiems pareigūnams ir taip išvengti galimų didesnių su maisto sa…	Is "jeoperdised" translated with the word for "hazard" (" pavojus")? Is the translation acceptable?
LT	risk	4	(37) Since some products authorised under food law such as pesticides or additives in animal feed may involve risks to the environment or to the safety of workers, some environmental and worker protection aspects should also be assessed by the Authority in accordance with the relevant legislation.	(37) Dėl to kai kurie produktai, leidžiami pagal maisto teisės aktus, pvz., pesticidai arba pašarų priedai, gali būti pavojingi aplinkai arba darbuotojų saugumui. Tarnyba, remdamasi atitinkamais teisės aktais, turėtų įvertinti ir kai kuriuos su aplinkosauga bei darbuotojų sauga susijusius klausimus.	Is "risk" translated as "hazard" ("pavojing") in "risks to the environment"?
LT	risk	5	(59) A system for rapid alert already exists in the framework of Council Directive 92/59/EEC of 29 June 1992 on general product safety (1). The scope of the existing system includes food and industrial products but not feed. Recent food crises have demonstrated the need to set up an improved and broadened rapid alert system covering food and feed. This revised system should be managed by the Comm…	(59) Remiantis 1992 m. birželio 29 d. Tarybos direktyva 92/59/EEB dėl bendrosios produktų saugos (1), yra sukurta skubaus įspėjimo apie pavojų sistema. Dabartinė sistema taikoma maisto ir pramoniniams produktams, bet ne pašarams. Neseniai vykusios maisto krizės parodė, jog būtina sukurti maistui ir pašarams taikytiną patobulintą ir išplėstą skubaus įspėjimo apie pavojų sistemą. Šią patikslintą si…	Is "Rapid system alert" translated as "hazard system" ("pavojų sistem")? Is the translation acceptable?
LT	risk	5	(60) Recent food safety incidents have demonstrated the need to establish appropriate measures in emergency situations ensuring that all foods, whatever their type and origin, and all feed should be subject to common measures in the event of a serious risk to human health, animal health or the environment. Such a comprehensive approach to emergency food safety measures should allow effective acti…	(60) Paskutiniai su maisto sauga susiję įvykiai parodė, kad nepaprastosios padėties atvejams būtina nustatyti atitinkamas priemones, užtikrinančias, kad, kilus rimtam pavojui žmonių bei gyvūnų sveikatai ar aplinkai, visiems maisto produktams, neatsižvelgiant į jų rūšį bei kilmę, ir visiems pašarams būtų taikomos bendrosios priemonės. Toks išsamus požiūris į nepaprastosios padėties atveju taikomas…	Is "risk" translated as "hazard" ("pavojing")?
LT	risk	10	Without prejudice to the applicable provisions of Community and national law on access to documents, where there are reasonable grounds to suspect that a food or feed may present a risk for human or animal health, then, depending on the nature, seriousness and extent of that risk, public authorities shall take appropriate steps to inform the general public of the nature of the risk to health, ide…	Nepažeidžiant Bendrijos ir nacionalinės teisės aktų taikytinų nuostatų dėl galimybės naudotis dokumentais, tuomet, kai yra rimtų priežasčių įtarti, kad maistas arba pašarai gali kelti pavojų žmonių ar gyvūnų sveikatai, atsižvelgiant į rizikos pagrįstumą bei dydį, valstybinės valdžios institucijos imasi atitinkamų priemonių informuodamos plačiąją visuomenę apie sveikatos rizikos pobūdį ir nurodo v…	Is "risk" translated as "hazard" ("pavojing")?
LT	risk	12	3. A food business operator shall immediately inform the competent authorities if it considers or has reason to believe that a food which it has placed on the market may be injurious to human health. Operators shall inform the competent authorities of the action taken to prevent risks to the final consumer and shall not prevent or discourage any person from cooperating, in accordance with nationa…	3. Jei maisto verslo operatorius mano arba turi pagrindo manyti, kad jo į rinką pateiktas maistas gali pakenkti žmonių sveikatai, apie tai jis nedelsdamas praneša kompetentingoms institucijoms. Operatorius informuoja kompetentingas institucijas apie prevencinius veiksmus, kurių buvo imtasi siekiant apsaugoti nuo pavojaus galutinį vartotoją, ir, jei tai gali sustabdyti, sumažinti arba pašalinti dė…	Is "risk" translated as "hazard" ("pavojų") in eliminate a risk"?
LT	risk	12	4. Food business operators shall collaborate with the competent authorities on action taken to avoid or reduce risks posed by a food which they supply or have supplied.	4. Maisto verslo operatoriai su kompetentingomis institucijoms bendradarbiauja atliekant veiksmus, leidžiančius išvengti arba sumažinti pavojų, kurį kelią jų tiekiamas arba jau pateiktas maistas.	Is "risk" translated as "hazard" ("pavojų") in "reduce risks")?
LT	risk	12	3. A feed business operator shall immediately inform the competent authorities if it considers or has reason to believe that a feed which it placed on the market may not satisfy the feed safety requirements. It shall inform the competent authorities of the action taken to prevent risk arising from the use of that feed and shall not prevent or discourage any person from cooperating, in accordance …	3. Jei pašarų verslo operatorius mano arba turi pagrindo manyti, kad jo į rinką pateiktas pašaras gali neatitikti pašarų saugos reikalavimų, apie tai jis nedelsdamas praneša kompetentingoms institucijoms. Operatorius informuoja kompetentingas institucijas apie prevencinius veiksmus, kurių buvo imtasi siekiant išvengti su to pašaro vartojimu susijusios rizikos, ir, jei tai gali sustabdyti, sumažin…	Is "risk" translated as "hazard" ("pavojų") in eliminate a risk"?
LT	risk	13	(f) to undertake action to identify and characterise emerging risks, in the fields within its mission;	f) imtis veiksmų, leidžiančių nustatyti ir apibūdinti jos veiklos srityse kylantį pavojų;	Is "risk" translated as "hazard" ("pavojų" in "emerging risks")?
LT	risk	15	(d) where the Authority or a Member State identifies an emerging risk.	d) kai tarnyba arba valstybė narė nustato kylantį pavojų.	Is "risk" translated as "hazard" ("pavojų" in "emerging risks")?
LT	risk	18	2. The Management Board, acting on a proposal from the Executive Director, shall draw up a list to be made public of competent organisations designated by the Member States which may assist the Authority, either individually or in networks, with its mission. The Authority may entrust to these organisations certain tasks, in particular preparatory work for scientific opinions, scientific and techn…	2. Valdančioji taryba Vykdomojo direktoriaus siūlymu sudaro viešai skelbtiną valstybių narių paskirtų kompetentingų organizacijų, galinčių individualiai arba per tinklus padėti tarnybai vykdyti jos misiją, sąrašą. Tarnyba gali šioms organizacijoms pavesti tam tikras užduotis, pirmiausia atlikti paruošiamąjį darbą, susijusį su mokslinėmis nuomonėmis, teikti mokslinę bei techninę pagalbą, rinkti du…	Is "risk" translated as "hazard" ("pavojų" in "emerging risks")?
LT	hazard	21	1. A rapid alert system for the notification of a direct or indirect risk to human health deriving from food or feed is hereby established as a network. It shall involve the Member States, the Commission and the Authority. The Member States, the Commission and the Authority shall each designate a contact point, which shall be a member of the network. The Commission shall be responsible for managi…	1. Skubaus įspėjimo apie pavojų sistema, skirta pranešti apie tiesioginį arba netiesioginį maisto ar pašarų keliamą pavojų žmonių sveikatai, šiuo reglamentu yra nustatoma kaip tinklas. Jį sudaro valstybės narės, Komisija ir tarnyba. Valstybės narės, Komisija ir tarnyba, kiekviena atskirai, paskiria po kontaktinį punktą, kuris yra tinklo narys. Komisija atsako už tinklo valdymą.	Is "risk" translated as "hazard" ("pavojų") in "risk to human health"?
LT	hazard	21	2. Where a member of the network has any information relating to the existence of a serious direct or indirect risk to human health deriving from food or feed, this information shall be immediately notified to the Commission under the rapid alert system. The Commission shall transmit this information immediately to the members of the network.	2. Jei tinklo narys turi informacijos apie maisto ar pašarų keliamą tiesioginį arba netiesioginį pavojų žmonių sveikatai, ši informacija skubaus įspėjimo apie pavojų sistema turi būti nedelsiant perduota Komisijai. Komisija ją tuoj pat perduoda tinklo nariams.	Is "risk" translated as "hazard" ("pavojų") in "risk to human health"?
LT	hazard	21	(c) any rejection, related to a direct or indirect risk to human health, of a batch, container or cargo of food or feed by a competent authority at a border post within the European Union.	c) kiekvieną Europos Sąjungos pasienio posto kompetentingos institucijos su tiesioginiu arba netiesioginiu pavojumi žmonių sveikatai susijusį produktų arba pašarų partijos, konteinerio ar krovinio atmetimą.	Is "risk" translated as "hazard" ("pavojų") in "risk to human health"?
LT	hazard	21	1. Information, available to the members of the network, relating to a risk to human health posed by food and feed shall in general be available to the public in accordance with the information principle provided for in Article 10. In general, the public shall have access to information on product identification, the nature of the risk and the measure taken.	1. Tinklo nariams prieinama informacija dėl maisto ir pašarų žmonių sveikatai keliamo pavojaus, remiantis 10 straipsnyje numatytu informavimo principu, paprastai turi būti prieinama visuomenei. Apskritai visuomenė turi teisę į informaciją apie produktų ženklinimą, rizikos pobūdį ir taikomas priemones.	Is "risk" translated as "hazard" ("pavojaus") in "risk to human health"?
LT	hazard	22	1. Where it is evident that food or feed originating in the Community or imported from a third country is likely to constitute a serious risk to human health, animal health or the environment, and that such risk cannot be contained satisfactorily by means of measures taken by the Member State(s) concerned, the Commission, acting in accordance with the procedure provided for in Article 58(2) on it…	1. Kai yra akivaizdu, kad Bendrijos kilmės arba iš trečiųjų šalių importuotas maistas arba pašarai gali kelti rimtą pavojų žmonių bei gyvūnų sveikatai ar aplinkai ir kad šio pavojaus konkrečios valstybės narės (valstybių narių) taikytomis priemonėmis sėkmingai išvengti neįmanoma, Komisija 58 straipsnio 2 dalyje nustatyta tvarka, atsižvelgdama į padėties sudėtingumą, savo iniciatyva arba valstybės…	Is "risk" translated as "hazard" ("pavojaus") in "risk to human health"?
LT	hazard	23	1. The crisis unit shall be responsible for collecting and evaluating all relevant information and identifying the options available to prevent, eliminate or reduce to an acceptable level the risk to human health as effectively and rapidly as possible.	1. Krizių valdymo grupė yra atsakinga už visos atitinkamos informacijos rinkimą bei vertinimą ir kuo veiksmingesnį bei greitesnį turimų variantų, leidžiančių sustabdyti, pašalinti arba iki priimtino lygio sumažinti pavojų žmonių sveikatai, nustatymą.	Is "risk" translated as "hazard" ("pavojų") in "risk to human health"?
LT	hazard	23	3. The crisis unit shall keep the public informed of the risks involved and the measures taken.	3. Krizių valdymo grupė nuolat informuoja visuomenę apie gręsiantį pavojų ir taikomas priemones.	Is "risk" translated as "hazard" ("pavojų") in "risks involved"?
New version
Language	Term	Location (doc page)	English	Translation	Observation	EFSA Focal Point
LT	hazard	-	-	-	-	-
Language	Term	Location (doc page)	English	Translation	Observation	EFSA Focal Point
LT	risk	-	-	-	-	-

## Sheet: REG 852-2004
Old version
Language	Term	Location (doc page)	English	Translation	Observation	EFSA Focal Point
LT	hazard	2	(10) Food hazards present at the level of primary production should be identified and adequately controlled to ensure the achievement of the objectives of this Regulation. However, in the case of the direct supply of small quantities of primary products, by the food business operator producing them, to the final consumer or to a local retail establishment, it is appropriate to protect public heal…	(10) Siekiant užtikrinti šio reglamento tikslų siekimą, pirminio maisto paruošimo etape rizikos veiksniai turėtų būti identifikuojami ir atitinkamai stebimi. Tačiau maisto tvarkymo subjektams tiesiogiai tiekiant jų pagamintus mažus pirminių produktų kiekius galutiniam vartotojui arba vietinei mažmeninės prekybos įmonei, būtina tinkamai saugoti visuomenės sveikatą, laikantis šalies įstatymų, visų …	Is "hazards" translated as "risk factors" ("rizikos veiksniai") in "food hazards"?
LT	hazard	2	(11) The application of hazard analysis and critical control point (HACCP) principles to primary production is not yet generally feasible. However, guides to good practice should encourage the use of appropriate hygiene practices at farm level. Where necessary, specific hygiene rules for primary production should supplement these guides. It is appropriate for the hygiene requirements applicable t…	(11) Rizikos veiksnių analizės ir svarbiųjų valdymo taškų sistemos (RVASVT) principų taikymas pirminiu maisto gaminimo etapu iš esmės kol kas yra neįmanomas. Tačiau geros higienos praktikos taisyklės turėtų skatinti tinkamų higienos praktikų naudojimą ūkių lygiu. Šios taisyklės prireikus turėtų būti papildytos specialiosiomis higienos taisyklėmis. Pirminei gamybai ir susijusioms operacijoms taiko…	Is "hazards" translated as "risk factors" ("Rizikos veiksnių") in "hazard analysis "?
LT	hazard	4	(a) ‘food hygiene’, hereinafter called ‘hygiene’, means the measures and conditions necessary to control hazards and to ensure fitness for human consumption of a foodstuff taking into account its intended use;	a) „maisto higiena“ (toliau – higiena) – tai rizikos veiksniams kontroliuoti ir žmonių vartojamų maisto produktų tinkamumui, atsižvelgiant į jų paskirtį, užtikrinti reikalingos priemonės ir sąlygos;	Is "hazards" translated as "risk factors" ("rizikos veiksniams")?
LT	hazard	4	(f) ‘contamination’ means the presence or introduction of a hazard	f) „tarša“ – tai rizikos egzistavimas arba atsiradimas;	Is "hazard" translated as "risk" ("rizikos") in " introduction of a hazard"?
LT	hazard	5	Hazard analysis and critical control points	Rizikos veiksnių analizė ir svarbiausieji valdymo taškai	Is "hazards" translated as "risk factors" ("rizikos veiksniams") in "hazard analysis"?
LT	hazard	5	(a) identifying any hazards that must be prevented, eliminated or reduced to acceptable levels;	a) rizikos veiksnių, kuriems reikia užkirsti kelią, pašalinti ar sumažinti iki priimtino lygio, identifikavimas;	Is "hazards" translated as "risk factors" ("rizikos veiksniams") in "any hazards"?
LT	hazard	5	(b) identifying the critical control points at the step or steps at which control is essential to prevent or eliminate a hazard or to reduce it to acceptable levels;	b) svarbių valdymo taškų identifikavimas tame etape ar etapuose, kuriuose valdymas yra esminis dalykas užkertant kelią rizikos veiksniui ar jį pašalinant arba sumažinant jį iki priimtino lygio;	Is "hazards" translated as "risk factors" ("rizikos veiksniui") in "eliminate a hazard"?
LT	hazard	5	(c) establishing critical limits at critical control points which separate acceptability from unacceptability for the prevention, elimination or reduction of identified hazards;	c) kritinių svarbių valdymo taškų ribų nustatymas, kai nubrėžiama riba tarp to, kas priimtina ir kas nepriimtina, kad būtų vykdoma identifikuotų rizikos veiksnių prevencija, šalinimas ar jų sumažinimas;	Is "hazards" translated as "risk factors" ("rizikos veiksnių") in "identified hazards"?
LT	hazard	9	(c) explain the reasons for the adaptation, including, where relevant, by providing a summary of the hazard analysis carried out and any measures to be taken to ensure that the adaptation will not compromise the objectives of this Regulation;	c) paaiškinamos adaptavimo priežastys, įskaitant, kur tinka, atliktos rizikos veiksnių analizės santraukos pateikimą ir trumpai apibūdinamos priemonės, kurių reikia imtis tam, kad būtų užtikrinama, kad adaptavimu nebus trukdoma siekti šiame reglamente numatytų tikslų; ir	Is "hazards" translated as "risk factors" ("rizikos veiksnių") in "hazard analysis"?
LT	hazard	11	3. Notwithstanding the general duty laid down in paragraph 2, food business operators are to comply with appropriate Community and national legislative provisions relating to the control of hazards in primary production and associated operations, including:	3. Be 2 dalyje nurodyto reikalavimo, maisto tvarkymo subjektai turi laikytis atitinkamų Bendrijos ir šalies teisės aktų nustatytų nuostatų dėl pirminės gamybos ir su ja susijusių operacijų rizikos kontrolės, įskaitant:	Is "hazards" translated as "risks" ("rizikos") in "control of hazards"?
LT	hazard	11	(g) to store and handle waste and hazardous substances so as to prevent contamination;	g) atliekas ir kenksmingas medžiagas laikyti ir tvarkyti taip, kad jos netaptų taršos priežastimi;	Is "hazardous" translated as "harmful" ("kenksmingas medžiagas") in "hazardous substances "?
LT	hazard	12	(f) to store and handle wastes and hazardous substances so as to prevent contamination;	f) atliekas ir kenksmingas medžiagas laikyti ir tvarkyti taip, kad jos netaptų taršos priežastimi;	Is "hazardous" translated as "harmful" ("kenksmingas medžiagas") in "hazardous substances "?
LT	hazard	12	7. Food business operators are to keep and retain records relating to measures put in place to control hazards in an appropriate manner and for an appropriate period, commensurate with the nature and size of the food business. Food business operators are to make relevant information contained in these records available to the competent authority and receiving food business operators on request.	7. Atitinkamu būdu ir atitinkamą laikotarpį maisto tvarkymo subjektai, priklausomai nuo maisto verslo pobūdžio ir dydžio, turi saugoti įrašus, susijusius su rizikos veiksniams kontroliuoti panaudotomis priemonėmis. Maisto verslo operatorių atitinkama tuose įrašuose įrašyta informacija turi būti prieinama kompetentingai institucijai ir kitiems maisto verslo operatoriams, pastarųjų pageidavimu.	Is "hazards" translated as "risk factors" ("rizikos veiksniams") in "control hazards"?
LT	hazard	13	1. National and Community guides referred to in Articles 7 to 9 of this Regulation should contain guidance on good hygiene practice for the control of hazards in primary production and associated operations.	1. Šio reglamento 7–9 straipsniuose minimuose nacionaliniuose ir Bendrijos vadovuose turėtų būti pateiktos geros higienos praktikos gairės rizikos veiksniams pirminiame gamybos etape ir juo susijusiose operacijose kontroliuoti.	Is "hazards" translated as "risk factors" ("rizikos veiksniams") in "control of hazards"?
LT	hazard	13	2. Guides to good hygiene practice should include appropriate information on hazards that may arise in primary production and associated operations and actions to control hazards, including relevant measures set out in Community and national legislation or national and Community programmes. Examples of such hazards and measures may include:	2. Geros higienos praktikos vadovuose turėtų būti tinkamos informacijos apie pirminiame gamybos etape ir juo susijusiose operacijose galinčius atsirasti rizikos veiksnius bei apie veiksmus tokiems rizikos veiksniams valdyti, įskaitant tinkamas Bendrijos ir nacionaliniuose teisės aktuose ar nacionalinėse bei Bendrijos programose nustatytas priemones. Toliau pateikiama galimų tokių rizikos veiksnių…	Is "hazards" translated as "risk factors" ("rizikos veiksniams/veiksnius/veiksnių") in "control hazards" and "such hazards"?
LT	hazard	18	8. Hazardous and/or inedible substances, including animal feed, are to be adequately labelled and stored in separate and secure containers.	8. Kenksmingos ir (ar) nevalgomos medžiagos, įskaitant gyvūnų pašarą, turi būti atitinkami paženklintos etiketėmis ir laikomos atskirose ir saugiose talpyklose.	Is "hazardous" translated as "harmful" ("kenksmingas medžiagas") in "hazardous and/or inedible substance"?
Language	Term	Location (doc page)	English	Translation	Observation	EFSA Focal Point
LT	risk	11	(e) to ensure that staff handling foodstuffs are in good health and undergo training on health risks;	e) užtikrinančių, kad maisto produktus tvarkančių darbuotojų sveikatos būklė yra gera ir jie įgiję žinių sveikatos klausimais mokymuose;	Is the word "risk" missing from the Lithuanian version? Is the translation correct?
New version
Language	Term	Location (doc page)	English	Translation	Observation	EFSA Focal Point
LT	hazard	3	(a) ‘food hygiene’, hereinafter called ‘hygiene’, means the measures and conditions necessary to control hazards and to ensure fitness for human consumption of a foodstuff taking into account its intended use;	a) „maisto higiena“ (toliau – higiena) – tai rizikos veiksniams kontroliuoti ir žmonių vartojamų maisto produktų tinkamumui, atsižvelgiant į jų paskirtį, užtikrinti reikalingos priemonės ir sąlygos;	Is "hazards" translated as "risk factors" ("rizikos veiksniams")?
LT	hazard	3	(f) ‘contamination’ means the presence or introduction of a hazard	f) „tarša“ – tai rizikos egzistavimas arba atsiradimas;	Is "hazard" translated as "risk" ("rizikos")?
LT	hazard	5	Hazard analysis and critical control points	Rizikos veiksnių analizė ir svarbiausieji valdymo taškai	Is "hazards" translated as "risk factors" ("rizikos veiksniams")?
LT	hazard	5	(a) identifying any hazards that must be prevented, eliminated or reduced to acceptable levels;	a) rizikos veiksnių, kuriems reikia užkirsti kelią, pašalinti ar sumažinti iki priimtino lygio, identifikavimas;	Is "hazards" translated as "risk factors" ("rizikos veiksniams")?
LT	hazard	5	(b) identifying the critical control points at the step or steps at which control is essential to prevent or eliminate a hazard or to reduce it to acceptable levels;	b) svarbių valdymo taškų identifikavimas tame etape ar etapuose, kuriuose valdymas yra esminis dalykas užkertant kelią rizikos veiksniui ar jį pašalinant arba sumažinant jį iki priimtino lygio;	Is "hazards" translated as "risk factors" ("rizikos veiksniui")?
LT	hazard	5	(c) establishing critical limits at critical control points which separate acceptability from unacceptability for the prevention, elimination or reduction of identified hazards;	c) kritinių svarbių valdymo taškų ribų nustatymas, kai nubrėžiama riba tarp to, kas priimtina ir kas nepriimtina, kad būtų vykdoma identifikuotų rizikos veiksnių prevencija, šalinimas ar jų sumažinimas;	Is "hazards" translated as "risk factors" ("rizikos veiksnių")?
LT	hazard	11	(c) explain the reasons for the adaptation, including, where relevant, by providing a summary of the hazard analysis carried out and any measures to be taken to ensure that the adaptation will not compromise the objectives of this Regulation;	c) paaiškinamos adaptavimo priežastys, įskaitant, kur tinka, atliktos rizikos veiksnių analizės santraukos pateikimą ir trumpai apibūdinamos priemonės, kurių reikia imtis tam, kad būtų užtikrinama, kad adaptavimu nebus trukdoma siekti šiame reglamente numatytų tikslų; ir	Is "hazards" translated as "risk factors" ("rizikos veiksnių")?
LT	hazard	14	3. Notwithstanding the general duty laid down in paragraph 2, food business operators are to comply with appropriate Community and national legislative provisions relating to the control of hazards in primary production and associated operations, including:	3. Be 2 dalyje nurodyto reikalavimo, maisto tvarkymo subjektai turi laikytis atitinkamų Bendrijos ir šalies teisės aktų nustatytų nuostatų dėl pirminės gamybos ir su ja susijusių operacijų rizikos kontrolės, įskaitant:	Is "hazards" translated as "risks" ("rizikos") in "control of hazards"?
LT	hazard	15	(g) to store and handle waste and hazardous substances so as to prevent contamination;	g) atliekas ir kenksmingas medžiagas laikyti ir tvarkyti taip, kad jos netaptų taršos priežastimi;	Is "hazardous" translated as "harmful" ("kenksmingas medžiagas") in "hazardous substances"?
LT	hazard	15	(f) to store and handle wastes and hazardous substances so as to prevent contamination;	f) atliekas ir kenksmingas medžiagas laikyti ir tvarkyti taip, kad jos netaptų taršos priežastimi;	Is "hazardous" translated as "harmful" ("kenksmingas medžiagas") in "hazardous substances"?
LT	hazard	15	7. Food business operators are to keep and retain records relating to measures put in place to control hazards in an appropriate manner and for an appropriate period, commensurate with the nature and size of the food business. Food business operators are to make relevant information contained in these records available to the competent authority and receiving food business operators on request.	7. Atitinkamu būdu ir atitinkamą laikotarpį maisto tvarkymo subjektai, priklausomai nuo maisto verslo pobūdžio ir dydžio, turi saugoti įrašus, susijusius su rizikos veiksniams kontroliuoti panaudotomis priemonėmis. Maisto verslo operatorių atitinkama tuose įrašuose įrašyta informacija turi būti prieinama kompetentingai institucijai ir kitiems maisto verslo operatoriams, pastarųjų pageidavimu.	Is "hazards" translated as "risk factors" ("rizikos veiksniams")?
LT	hazard	16	1. National and Community guides referred to in Articles 7 to 9 of this Regulation should contain guidance on good hygiene practice for the control of hazards in primary production and associated operations.	1. Šio reglamento 7–9 straipsniuose minimuose nacionaliniuose ir Bendrijos vadovuose turėtų būti pateiktos geros higienos praktikos gairės rizikos veiksniams pirminiame gamybos etape ir juo susijusiose operacijose kontroliuoti.	Is "hazards" translated as "risk factors" ("rizikos veiksniams")?
LT	hazard	16	2. Guides to good hygiene practice should include appropriate information on hazards that may arise in primary production and associated operations and actions to control hazards, including relevant measures set out in Community and national legislation or national and Community programmes. Examples of such hazards and measures may include:	2. Geros higienos praktikos vadovuose turėtų būti tinkamos informacijos apie pirminiame gamybos etape ir juo susijusiose operacijose galinčius atsirasti rizikos veiksnius bei apie veiksmus tokiems rizikos veiksniams valdyti, įskaitant tinkamas Bendrijos ir nacionaliniuose teisės aktuose ar nacionalinėse bei Bendrijos programose nustatytas priemones. Toliau pateikiama galimų tokių rizikos veiksnių…	Is "hazards" translated as "risk factors" ("rizikos veiksniams/veiksnius/veiksnių")?
LT	hazard	22	2. Where non-potable water is used, for example for fire control, steam production, refrigeration and other similar purposes, it is to circulate in a separate duly identified system. Non-potable water is not to connect with, or allow reflux into, potable water systems.	Naudojant švarų vandenį, jo tiekimui turi būti įrengti tinkami įrengimai ir procedūros, siekiant užtikrinti, kad naudojimo metu nebūtų keliamas maisto taršos pavojus.	Is the translation correct? Is there an addition to the Lithuanian version such as " hazard of food contamination" ("maisto taršos pavojus")?
LT	hazard	23	8. Hazardous and/or inedible substances, including animal feed, are to be adequately labelled and stored in separate and secure containers.	8. Kenksmingos ir (ar) nevalgomos medžiagos, įskaitant gyvūnų pašarą, turi būti atitinkami paženklintos etiketėmis ir laikomos atskirose ir saugiose talpyklose.	Is "hazardous" translated as "harmful" ("kenksmingas medžiagas") in "hazardous and/or inedible substance"?
Language	Term	Location (doc page)	English	Translation	Observation	EFSA Focal Point
LT	risk	14	(e) to ensure that staff handling foodstuffs are in good health and undergo training on health risks;	e) užtikrinančių, kad maisto produktus tvarkančių darbuotojų sveikatos būklė yra gera ir jie įgiję žinių sveikatos klausimais mokymuose;	Is the word "risk" missing from the Lithuanian version? Is the translation correct?

## Sheet: REG 853-2004
Old version
Language	Term	Location (doc page)	English	Translation	Observation	EFSA Focal Point
LT	hazard	1	(7) The requirement in Regulation (EC) No /2004 ∗ whereby food business operators carrying out any stage of production, processing and distribution of food after primary production and associated operations must put in place, implement and maintain procedures based on hazard analysis and critical control point (HACCP) principles also permits simplification	(7) Reglamento (EB) Nr. 852/2004 reikalavimas, pagal kurį maisto tvarkymo subjektai, įgyvendinantiems bet kurį maisto gamybos, perdirbimo ir platinimo etapą, pasibaigus pirminiam gamybos etapui ir susijusioms operacijoms, turi taikyti, įdiegti ir išlaikyti procedūras, pagrįstas rizikos veiksnių analizės ir svarbiausių valdymo taškų (RVASVT) principais, taip pat leidžia supaprastinimą.	Is "hazard" translated as "risk" ("rizikos") in "hazard analysis"?
LT	hazard	43	6. Where fish are headed and/or gutted on board, such operations must be carried out hygienically as soon as possible after capture, and the products must be washed immediately and thoroughly with potable water or clean water. In that event, the viscera and parts that may constitute a danger to public health must be removed as soon as possible and kept apart from products intended for human consu…	6. Jeigu laive pašalinamos žuvų galvos ir (arba) žuvys išskrodžiamos, laikantis higienos reikalavimų šios operacijos turi būti atliekamos kiek galima greičiau žuvis sugavus, ir produktai nedelsiant bei kruopščiai turi būti nuplaunami geriamuoju arba švariu vandeniu. Šiuo atveju vidaus organai ir visuomenės sveikatai pavojų galinčios kelti dalys turi būti pašalintos kiek galima greičiau ir laikomo…	Is "danger" translated as "hazard" ("pavojų")? Should it be a differentiation between danger and hazard?
LT	hazard	52	(a) have regard to the procedures developed in accordance with the HACCP principles pursuant to Regulation (EC) No ..../2004 ∗ ; and	a) atsižvelgti į procedūras, parengtas laikantis rizikos veiksnių analizės ir svarbių valdymo taškų (RVASVT) sistemos principų pagal Reglamentą (EB) Nr. 854/2004;	Is "hazards" within "HACCP prnciples" translated as "risk" ("rizikos")?
Language	Term	Location (doc page)	English	Translation	Observation	EFSA Focal Point
LT	risk	3	(22) In order to ensure proper inspection of hunted wild game placed on the Community market, bodies of hunted animals and their viscera should be presented for official post-mortem inspection at a game-handling establishment. However, to preserve certain hunting traditions without prejudicing food safety, it is appropriate to provide for training for hunters who place wild game on the market for…	(22) Siekiant, kad į Bendrijos rinką pateikiami laukiniai medžiojamieji gyvūnai būtų tinkamai patikrinami, sumedžiotų gyvūnų kūnai ir jų vidaus organai po mirties turėtų būti pristatomi oficialiai patikrinti į medžiojamųjų gyvūnų tvarkymo įmones. Tačiau siekiant išsaugoti tam tikras medžioklės tradicijas nepažeidžiant maisto saugos reikalavimų, tikslinga numatyti laukinius medžiojamuosius gyvūnus…	Is "risk" translated as "hazard" ("pavojus") in "anomalies or hazards"?
LT	risk	29	(a) the animals cannot be transported, to avoid any risk for the handler or to protect the welfare of the animals;	a) gyvūnų negalima vežti, kad būtų išvengta bet kokio pavojaus prižiūrėtojui arba būtų apsaugota gyvūnų gerovė	Is "risk" translated as "hazard" ("pavojaus") in "any risk"?
LT	risk	29	2. The trained person must carry out an examination of the body, and of any viscera removed, to identify any characteristics that may indicate that the meat presents a health risk. The examination must take place as soon as possible after killing.	2. Kvalifikuotas asmuo turi ištirti sumedžioto gyvūno kūną ir visus pašalintus vidaus organus, kad būtų nustatyta, ar yra kokių nors savybių, patvirtinančių, jog mėsa kelia pavojų sveikatai. Sumedžiojus gyvūną, tyrimas turi būti atliekamas kiek galima greičiau	Is "risk" translated as "hazard" ("pavojų") in "health risk"?
LT	risk	31	1. The trained person must carry out an examination to identify any characteristics that may indicate that the meat presents a health risk. The examination must take place as soon as possible after killing	1. Kvalifikuotas asmuo turi atlikti tyrimą, kad būtų nustatytos visos savybės, leidžiančios suprasti, jog mėsa kelia pavojų sveikatai. Sumedžiojus gyvūną, tyrimas turi būti atliekamas kiek galima greičiau.	Is "risk" translated as "hazard" ("pavojų") in "health risk"?
LT	risk	38	1. Food business operators may use only those areas that the competent authority has approved for relaying live bivalve molluscs. Buoys, poles or other fixed means must clearly identify the boundaries of the sites. There must be a minimum distance between relaying areas, and also between relaying areas and production areas, so as to minimise any risk of the spread of contamination.	1. Maisto tvarkymo subjektai gali naudoti tik tas teritorijas, kurias kompetentinga institucija yra patvirtinusi tinkamomis gyvų dvigeldžių moliuskų natūralaus apsivalymo teritorijomis. Ribos turi būti aiškiai paženklintos plūdurais, kartimis arba kitomis stacionariosiomis priemonėmis. Tarp natūralaus apsivalymo teritorijų turi būti minimalus atstumas, taip pat minimalus atstumas turi būti tarp n…	Is "risk" translated as "hazard" ("pavojus") in "any risk"?
LT	risk	47	(b) is stored in such a manner that it is not exposed to a risk of contamination;	b) būtų laikoma taip, kad nekiltų pavojaus ją užteršti;	Is "risk" translated as "hazard" ("pavojaus") in "risk of contamination"?
LT	risk	49	1. Milking equipment, and premises where milk is stored, handled or cooled must be located and constructed so as to limit the risk of contamination of milk.	1. Melžimo įranga ir pastatai, kuriuose laikomas, tvarkomas arba atvėsinamas pienas, turi būti išdėstomi ir projektuojami taip, kad būtų sumažinamas pavojus užteršti pieną.	Is "risk" translated as "hazard" ("pavojus") in "risk of contamination"?
New version
Language	Term	Location (doc page)	English	Translation	Observation	EFSA Focal Point
LT	hazard	63	6. Where fish are headed and/or gutted on board, such operations must be carried out hygienically as soon as possible after capture, and the products must be washed immediately and thoroughly with potable water or clean water. In that event, the viscera and parts that may constitute a danger to public health must be removed as soon as possible and kept apart from products intended for human consu…	Jeigu laive pašalinamos žuvų galvos ir (arba) žuvys išskrodžiamos, laikantis higienos reikalavimų šios operacijos turi būti atliekamos kiek galima greičiau žuvis sugavus, ir produktai nedelsiant bei kruopščiai turi būti nuplaunami geriamuoju arba švariu vandeniu. Šiuo atveju vidaus organai ir visuomenės sveikatai pavojų galinčios kelti dalys turi būti pašalintos kiek galima greičiau ir laikomos a…	Is "danger" translated as "hazard" ("pavojų")? Should it be a differentiation between danger and hazard?
Language	Term	Location (doc page)	English	Translation	Observation	EFSA Focal Point
LT	risk	29	(c) heads and feet must be skinned or scalded and depilated; however, when authorised by the competent authority, visibly clean heads, not containing specified risk materials in accordance with Article 8 of Regulation (EC) No 999/2001 of the European Parliament and of the Council (2), and visibly clean feet, intended for processing into food, may be transported to and skinned or scalded and depil…	c) nuo galvų ir kojų turi būti pašalinama oda arba jos turi būti plikomos ir nuo jų pašalinami šeriai; tačiau, kompetentingai institucijai leidus, akivaizdžiai švarios galvos, kurių sudėtyje nėra nurodytų pavojingų medžiagų pagal Europos Parlamento ir Tarybos reglamento (EB) Nr. 999/2001 (2) 8 straipsnį, ir akivaizdžiai švarios kojos, skirtos perdirbti į maistą, gali būti vežamos į patvirtintą įm…	Is "risk" translated as "hazard" ("pavojingų") in "risk material"?
LT	risk	40	(a) the animals cannot be transported, to avoid any risk for the handler or to protect the welfare of the animals;	a) gyvūnų negalima vežti, kad būtų išvengta bet kokio pavojaus prižiūrėtojui arba būtų apsaugota gyvūnų gerovė;	Is "risk" translated as "hazard" ("pavojaus") in "any risk"?
LT	risk	42	2. The trained person must carry out an examination of the body, and of any viscera removed, to identify any characteristics that may indicate that the meat presents a health risk. The examination must take place as soon as possible after killing	2. Kvalifikuotas asmuo turi ištirti sumedžioto gyvūno kūną ir visus pašalintus vidaus organus, kad būtų nustatyta, ar yra kokių nors savybių, patvirtinančių, jog mėsa kelia pavojų sveikatai. Sumedžiojus gyvūną, tyrimas turi būti atliekamas kiek galima greičiau.	Is "risk" translated as "hazard" ("pavojų") in "health risk"?
LT	risk	44	1. The trained person must carry out an examination to identify any characteristics that may indicate that the meat presents a health risk. The examination must take place as soon as possible after killing.	1. Kvalifikuotas asmuo turi atlikti tyrimą, kad būtų nustatytos visos savybės, leidžiančios suprasti, jog mėsa kelia pavojų sveikatai. Sumedžiojus gyvūną, tyrimas turi būti atliekamas kiek galima greičiau.	Is "risk" translated as "hazard" ("pavojų") in "health risk"?
LT	risk	65	must ensure that the raw material or finished product undergo a freezing treatment in order to kill viable parasites that may be a risk to the health of the consumer.	turi užtikrinti, kad žaliava arba gatavas produktas būtų apdorojami šalčiu, siekiant sunaikinti gyvybingus parazitus, kurie gali kelti pavojų vartotojų sveikatai.	Is "risk" translated as "hazard" ("pavojų") in "risk to health"?
LT	risk	68	Fresh, prepared, frozen and processed fishery products belonging to the family Gempylidae, in particular Ruvettus pretiosus and Lepidocybium flavobrunneum, may only be placed on the market in wrapped/packaged form and must be appropriately labelled to provide information to the consumer on preparation/cooking methods and on the risk related to the presence of substances with adverse gastrointesti…	Švieži, paruošti, sušaldyti ir perdirbti žuvininkystės produktai iš Gempylidae (gyvatinių skumbrių) šeimai priklausančių žuvų, ypač Ruvettus pretiosus (taukinės skumbrės) ir Lepidocybium flavobrunneum (geltondryžės riebžuvės), rinkai gali būti tiekiami tik suvynioti ir (arba) supakuoti ir turi būti atitinkamai paženklinti nurodant vartotojui informaciją apie paruošimo ir (arba) gaminimo būdus bei…	Is "risk" translated as "hazard" ("pavojų") in "risk related"?
LT	risk	68	(b) is stored in such a manner that it is not exposed to a risk of contamination;	b) būtų laikoma taip, kad nekiltų pavojaus ją užteršti;	Is "risk" translated as "hazard" ("pavojaus") in "risk of contamination"?
LT	risk	71	1. Milking equipment and premises where milk and colostrum are stored, handled or cooled must be located and constructed so as to limit the risk of contamination of milk and colostrum	1. Melžimo įranga ir patalpos, kuriose pienas ir priešpienis yra laikomi, tvarkomi ar šaldomi, turi būti išdėstytos ir pastatytos taip, kad būtų sumažintas pieno ir priešpienio užteršimo pavojus.	Is "risk" translated as "hazard" ("pavojaus") in "risk of contamination"?
LT	risk	80	(a) bones, other than specified risk materials as defined in Article 3(1)(g) of Regulation (EC) No 999/2001 of the European Parliament and of the Council (1);	a) kaulai, išskyrus nurodytą pavojingą medžiagą, kaip apibrėžta Europos Parlamento ir Tarybos reglamento (EB) Nr. 999/2001 3 straipsnio 1 dalies g punkte (1);	Is "risk" translated as "hazard" ("pavojingą") in "risk material"?
LT	risk	81	(i) bones other than specified risk material as defined in Article 3(1)(g) of Regulation (EC) No 999/2001 coming from establishments under the control of and listed by the competent authority, and that have been subjected to one of the following treatments:	i) kaulai, išskyrus nurodytą pavojingą medžiagą, kaip apibrėžta Reglamento (EB) Nr. 999/2001 3 straipsnio 1 dalies g punkte, gauti iš įmonių, kurios yra kontroliuojamos kompetentingos institucijos ir įtrauktos į jos sąrašą, ir kurie buvo apdoroti vienu iš tokių būdų:	Is "risk" translated as "hazard" ("pavojingą") in "risk material"?
LT	risk	82	(iii) bones other than specified risk material defined in Article 3(1)(g) of Regulation (EC) No 999/2001, hides and skins of farmed ruminant animals, pig skins, poultry skins, fish hides and wild game hides and skins that have undergone any other treatment than those specified in point (i) or (ii) and that come from establishments registered or approved pursuant to Regulation (EC) No 852/2004 or …	iii) kaulai, išskyrus nurodytą pavojingą medžiagą, kaip apibrėžta Reglamento (EB) Nr. 999/2001 3 straipsnio 1 dalies g punkte, ūkyje auginamų atrajojančiųjų gyvūnų kailiai ir odos, kiaulių odos, naminių paukščių odos, žuvų odos ir laukinių medžiojamųjų gyvūnų kailiai ir odos, kurie niekaip nebuvo konservuoti, išskyrus i arba ii punktuose nurodytus būdus ir yra gauti iš įmonių, registruotų arba pa…	Is "risk" translated as "hazard" ("pavojingą") in "risk material"?
LT	risk	82	All precautions, including safe disposal of animal by-products, waste, unused or surplus material, shall be taken to avoid risks of spreading diseases to animals.	Turi būti imamasi visų atsargumo priemonių, įskaitant saugų gyvūninių produktų, atliekų, nepanaudotų arba perteklinių medžiagų sunaikinimą, siekiant išvengti ligų perdavimo gyvūnams pavojaus.	Is "risk" translated as "hazard" ("pavojaus") in "avoid risks"?
LT	risk	83	(a) bones, other than specified risk materials as defined in Article 3(1)(g) of Regulation (EC) No 999/2001;	a) kaulų, išskyrus nurodytą pavojingą medžiagą, kaip apibrėžta Reglamento (EB) Nr. 999/2001 3 straipsnio 1 dalies g punkte;	Is "risk" translated as "hazard" ("pavojingą") in "risk materials"?
LT	risk	84	(i) bones other than specified risk material as defined in Article 3(1)(g) of Regulation (EC) No 999/2001 coming from establishments under the control of and listed by the competent authority, and that have been subjected to one of the following treatments:	i) kaulai, išskyrus nurodytą pavojingą medžiagą, kaip apibrėžta Reglamento (EB) Nr. 999/2001 3 straipsnio 1 dalies g punkte, gauti iš kontroliuojamų ir kompetentingos institucijos įtrauktų į sąrašą įmonių, ir kurie buvo apdoroti vienu iš šių būdų:	Is "risk" translated as "hazard" ("pavojingą") in "risk material"?
LT	risk	84	(iii) bones other than specified risk material defined in Article 3(1)(g) of Regulation (EC) No 999/2001, hides and skins of farmed ruminant animals, pig skins, poultry skins, fish hides and wild game hides and skins that have undergone any other treatment than those specified in point (i) or (ii) and that come from establishments registered or approved pursuant to Regulation (EC) No 852/2004 or …	iii) kaulai, išskyrus nurodytą pavojingą medžiagą, kaip apibrėžta Reglamento (EB) Nr. 999/2001 3 straipsnio 1 dalies g punkte, ūkyje auginamų atrajojančiųjų gyvūnų kailiai ir odos, kiaulių odos, naminių paukščių odos, žuvų odos ir laukinių medžiojamųjų gyvūnų kailiai ir odos, kurios niekaip nebuvo konservuotos, išskyrus i arba ii punktuose nurodytus būdus ir yra gautos iš įmonių, registruotų arba…	Is "risk" translated as "hazard" ("pavojingą") in "risk material"?
LT	risk	85	All precautions, including safe disposal of animal by-products, waste, unused or surplus material, shall be taken to avoid risks of spreading diseases to animals.	Turi būti imamasi visų atsargumo priemonių, įskaitant saugų gyvūninių produktų, atliekų, nepanaudotų arba perteklinių medžiagų sunaikinimą, siekiant išvengti ligų perdavimo gyvūnams pavojaus.	Is "risk" translated as "hazard" ("pavojaus") in "avoid risks"?
LT	risk	87	must ensure that the treatment of the raw materials used eliminates any animal or public health risk.	turi užtikrinti, kad dėl taikyto žaliavų apdorojimo būdo būtų panaikintas bet koks pavojus gyvūnų arba visuomenės sveikatai.	Is "risk" translated as "hazard" ("pavojų") in "health risk"?

## Sheet: REG 625-2017
Old version
Language	Term	Location (doc page)	English	Translation	Observation	EFSA Focal Point
LT	hazard	2	(6) Transmissible animal diseases, including by micro-organisms that have developed resistance to antimicrobials, may have a significant impact on public health, food and feed safety, and animal health and welfare. In order to ensure high standards of animal and public health in the Union, rules on animal health measures and on feed and food safety are laid down at Union level. Compliance with th…	6) užkrečiamosios gyvūnų ligos, įskaitant ligas, kurias sukelia atsparumą antimikrobinėms medžiagoms įgiję mikroorganizmai, gali daryti didelį poveikį visuomenės sveikatai, maisto bei pašarų saugai ir gyvūnų sveikatai bei gerovei. Siekiant užtikrinti aukštus gyvūnų ir visuomenės sveikatos standartus Sąjungoje, taisyklės dėl gyvūnų sveikatos priemonių ir dėl pašarų bei maisto saugos nustatomos Sąj…	Is the word "threats" missing from the Lithuanian version? Is the translation acceptable?
Language	Term	Location (doc page)	English	Translation	Observation	EFSA Focal Point
LT	risk	5	(31) The competent authorities should ensure that the staff responsible for official controls does not disclose information acquired during the performance of those controls where that information is covered by professional secrecy. Unless there is an overriding interest to justify disclosure, professional secrecy should include information which would undermine the purpose of inspections, invest…	(31) kompetentingos institucijos turėtų užtikrinti, kad už oficialią kontrolę atsakingi darbuotojai neatskleistų vykdant tą kontrolę gautos informacijos, kai tai informacijai taikomas įpareigojimas išlaikyti profesinę paslaptį. Jei nėra viršesnio intereso, kuriuo pateisinamas informacijos atskleidimas, profesine paslaptimi taip pat turėtų būti laikoma informacija, kurią atskleidus būtų galima pak…	Is "risk for health" translated as hazard for health "pavojų sveikatai"?
LT	risk	14	(85) It is important for the performance of effective official controls and other official activities that the competent authorities in the Member States, the Commission and, where relevant, operators be able to exchange data and information related to official controls or results therefrom rapidly and efficiently. Several information systems are established by Union legislation and managed by th…	(85) norint veiksmingai vykdyti oficialią kontrolę ir kitą oficialią veiklą svarbu, kad valstybių narių kompetentingos institucijos, Komisija ir, prireikus, veiklos vykdytojai galėtų greitai ir veiksmingai keistis duomenimis ir informacija, susijusiais su oficialia kontrole ar jos rezultatais. Sąjungos teisės aktais sukurtos kelios informacinės sistemos, kurias valdo Komisija ir kurios suteikia g…	Is "risk" translated as "hazard" ("pavojų") in "risk for health"?
LT	risk	21	34) ‘specified risk material’ means specified risk material as defined in point (g) of Article 3(1) of Regulation (EC) No 999/2001;	34) nurodytos pavojingos medžiagos – nurodytos pavojingos medžiagos, kaip apibrėžta Reglamento (EB) Nr. 999/2001 3 straipsnio 1 dalies g punkte;	Is "risk" translated as "hazard" ("pavojingos") in "risk material"?
LT	risk	29	an assessment of procedures on good manufacturing practices, good hygiene practices, good farming practices, and of procedures based on the principles of hazard analysis critical control points (HACCP);	gerosios gamybos praktikos, gerosios higienos praktikos, gerosios ūkininkavimo patirties ir rizikos veiksnių analizės ir svarbiųjų valdymo taškų sistemos (toliau – RVASVT) principais grindžiamų procedūrų vertinimą	Is "hazard" translated as "risk" ("rizikos") in "hazard analysis"?
LT	risk	31	ii) safe removal of specified risk material, and	ii) saugiam nurodytos pavojingos medžiagos pašalinimui ir	Is "risk" translated as "hazard" ("pavojingos") in "risk material"?
LT	risk	32	v) the handling and disposal of animal by-products and of specified risk material;	v) šalutinių gyvūninių produktų ir nurodytos pavojingos medžiagos tvarkymui ir šalinimui;	Is "risk" translated as "hazard" ("pavojingos") in "risk material"?
LT	risk	72	b) the mechanisms and technical arrangements to ensure the issuance of accurate and reliable official certificates, and prevent risk of fraud;	b) mechanizmais ir technine tvarka, skirtais užtikrinti, kad būtų išduodami tikslūs bei patikimi oficialūs sertifikatai, ir būtų užkirstas kelias sukčiavimui;	Is "risk of fraud" translated as "prevent fraud"? Is the translation acceptable?
New version
Language	Term	Location (doc page)	English	Translation	Observation	EFSA Focal Point
LT	hazard	18	(d) an assessment of procedures on good manufacturing practices, good hygiene practices, good farming practices, and of procedures based on the principles of hazard analysis critical control points (HACCP);	d) gerosios gamybos praktikos, gerosios higienos praktikos, gerosios ūkininkavimo patirties ir rizikos veiksnių analizės ir svarbiųjų valdymo taškų sistemos (toliau – RVASVT) principais grindžiamų procedūrų vertinimą;	Is "hazard" translated as "risk" ("rizikos") in "hazard analysis".
LT	hazard	31	(2) Regulation (EU) No 649/2012 of the European Parliament and of the Council of 4 July 2012 concerning the export and import of hazardous chemicals (OJ L 201, 27.7.2012, p. 60).	(2) 2012 m. liepos 4 d. Europos Parlamento ir Tarybos reglamentas (ES) Nr. 649/2012 dėl pavojingų cheminių medžiagų eksporto ir importo (OL L 201, 2012 7 27, p. 60).	Is "hazardous" translated as "dangerous" ("pavojingų") in "hazardous chemicals"?
LT	hazard	38	(iii) the independence or impartiality of the delegated body or natural person has been shown to be compromised.	iii) paaiškėjo, kad kilo pavojus įgaliotosios įstaigos ar fizinio asmens nepriklausomumui arba nešališkumui.	Is the word "hazard" ("pavojus") used for expressing "comprised"? Is the translation acceptable?
Language	Term	Location (doc page)	English	Translation	Observation	EFSA Focal Point
LT	risk	7	(34) ‘specified risk material’ means specified risk material as defined in point (g) of Article 3(1) of Regulation (EC) No 999/2001;	34) nurodytos pavojingos medžiagos – nurodytos pavojingos medžiagos, kaip apibrėžta Reglamento (EB) Nr. 999/2001 3 straipsnio 1 dalies g punkte;	Is "risk" translated as "danger" ("pavojingos"). Should "risk" differentiate from "danger"?
LT	risk	20	(ii) safe removal of specified risk material, and	ii) saugiam nurodytos pavojingos medžiagos pašalinimui ir	Is "risk" translated as "danger" ("pavojingos"). Should "risk" differentiate from "danger"?
LT	risk	21	(v) the handling and disposal of animal by-products and of specified risk material;	v) šalutinių gyvūninių produktų ir nurodytos pavojingos medžiagos tvarkymui ir šalinimui;	Is "risk" translated as "danger" ("pavojingos"). Should "risk" differentiate from "danger"?
LT	risk	77	(b) the mechanisms and technical arrangements to ensure the issuance of accurate and reliable official certificates, and prevent risk of fraud;	b) mechanizmais ir technine tvarka, skirtais užtikrinti, kad būtų išduodami tikslūs bei patikimi oficialūs sertifikatai, ir būtų užkirstas kelias sukčiavimui;	Is "risk" is missing from the Lithuanian version? Is the translation acceptable?

## Sheet: REG 1381-2019
Single version
Language	Term	Location (doc page)	English	Translation	Observation	EFSA Focal Point
LT	hazard	-	-	-	-	-
Language	Term	Location (doc page)	English	Translation	Observation	EFSA Focal Point
LT	risk	-	-	-	-	-
