# Supplementary material for: Food Risk Analysis: Towards a Better Understanding of „Hazard” and „Risk” in EU food legislation
Source: Preprints.org preprint supplement (doi:10.20944/preprints202306.1556.v1), 2023-06-21
Supplement: Supplementary file 19 [file LV.xlsx]

## Sheet: REG 178-2002
Old version
Language	Term	Location (doc page)	English	Translation	Observation	EU-FORA fellow reply
LV	hazard	3	(28) Experience has shown that the functioning of the internal market in food or feed can be jeopardised where it is impossible to trace food and feed. It is therefore necessary to establish a comprehensive system of traceability within food and feed businesses so that targeted and accurate withdrawals can be undertaken or information given to consumers or control officials, thereby avoiding the …	(28) Pieredze rāda, ka pārtikas vai barības iekšējā tirgus darbība var tikt apdraudēta gadījumā, ja pārtiku un barību nevar izsekot. Līdz ar to jāizveido tāda visaptveroša izsekojamības sistēma pārtikas un barības uzņēmumos, lai būtu iespējams mērķtiecīgi un precīzi izņemt produktus no tirgus vai sniegt informāciju patērētājiem vai amatpersonām, kas veic kontroli, tādējādi izvairoties no vēl plaš…	Is "jeoperdised" translated with the word for "hazard" ("apdraudēta/apdraudēts")? Is the translation acceptable?
Language	Term	Location (doc page)	English	Translation	Observation	EU-FORA fellow reply
LV	risk	-	-	-	-	-
New version
Language	Term	Location (doc page)	English	Translation	Observation	EU-FORA fellow reply
LV	hazard	-	-	-	-	-
Language	Term	Location (doc page)	English	Translation	Observation	EU-FORA fellow reply
LV	risk	-	-	-	-	-

## Sheet: REG 852-2004
Old version
Language	Term	Location (doc page)	English	Translation	Observation	EU-FORA fellow reply
LV	hazard	2	(10) Food hazards present at the level of primary production should be identified and adequately controlled to ensure the achievement of the objectives of this Regulation. However, in the case of the direct supply of small quantities of primary products, by the food business operator producing them, to the final consumer or to a local retail establishment, it is appropriate to protect public heal…	(10) Lai sasniegtu šajā regulā norādītos mērķus, pārtikas bīstamība primārās ražošanas posmā jāidentificē un atbilstoši jākontrolē. Ja pamatproduktu tiešu piegādi nelielos daudzumos galapatērētājiem vai vietējiem mazumtirdzniecības uzņēmumiem veic pārtikas nozares uzņēmēji, kas tos ražo, sabiedrības veselība tomēr ir jāaizsargā ar attiecīgās valsts tiesību aktiem, jo īpaši ražotāju un patērētāju …	Is "hazards" translated as "dangers" ("bīstamība") in "food hazards"?
LV	hazard	2	(11) The application of hazard analysis and critical control point (HACCP) principles to primary production is not yet generally feasible. However, guides to good practice should encourage the use of appropriate hygiene practices at farm level. Where necessary, specific hygiene rules for primary production should supplement these guides. It is appropriate for the hygiene requirements applicable t…	(11) Vēl nav pilnībā iespējams piemērot primārajai ražošanai riska analīzes un kritisko kontrolpunktu (HACCP) principus. Tomēr labas prakses norādījumiem jāveicina atbilstoša higiēnas prakses izmantošana saimniecības līmenī. Vajadzības gadījumā minētie norādījumi jāpapildina ar īpašiem higiēnas noteikumiem primārajā ražošanā. Ir lietderīgi, lai primārai ražošanai un ar to saistītiem procesiem pie…	Is "hazards" translated as "dangers" ("bīstamība") in "hazard analysis"?
LV	hazard	5	Hazard analysis and critical control points	Riska analīze un kritiskie kontrolpunkti	Is "hazard" translated as "risk" ("riska") in "hazard analysis"?
LV	hazard	9	(c) explain the reasons for the adaptation, including, where relevant, by providing a summary of the hazard analysis carried out and any measures to be taken to ensure that the adaptation will not compromise the objectives of this Regulation;	c) izskaidro pielāgošanas iemeslus, attiecīgā gadījumā sniedzot veiktās riska analīzes kopsavilkumu un veicamos pasākumus, lai nodrošinātu, ka pielāgošana netraucēs šīs regulas mērķu sasniegšanu; un	Is "hazard" translated as "risk" ("riska") in "hazard analysis"?
LV	hazard	11	3. Notwithstanding the general duty laid down in paragraph 2, food business operators are to comply with appropriate Community and national legislative provisions relating to the control of hazards in primary production and associated operations, including:	3. Neatkarīgi no 2. punktā noteiktajiem vispārīgajiem pienākumiem pārtikas apritē iesaistītajiem tirgus dalībniekiem jāizpilda attiecīgi Kopienas un valsts tiesību aktu noteikumi, kas attiecas uz bīstamības kontroli primārajā ražošanā un ar to saistītajās darbībās, ietverot:	Is "hazards" translated as "dangers" ("bīstamības") in "control of hazards"?
LV	hazard	11	(g) to store and handle waste and hazardous substances so as to prevent contamination;	g) atkritumi un bīstamās vielas jāuzglabā un ar tām jārīkojas tā, lai nepieļautu piesārņojumu;	Is "hazardous" translated as "dangerous" (" bīstamās") in "hazardous and/or inedible substances"?
LV	hazard	11	(f) to store and handle wastes and hazardous substances so as to prevent contamination;	f) atkritumi un bīstamās vielas jāuzglabā un ar tām jārīkojas tā, lai nepieļautu piesārņojumu;	Is "hazardous" translated as "dangerous" (" bīstamās") in "hazardous and/or inedible substances"?
LV	hazard	16	(f) adequate arrangements and/or facilities for the hygienic storage and disposal of hazardous and/or inedible substances and waste (whether liquid or solid) are to be available;	f) jābūt pieejamam atbilstošam aprīkojumam un/vai iekārtām bīstamo un/vai neēdamo vielu un atkritumu (šķidro vai cieto) higiēniskai uzglabāšanai un iznīcināšanai;	Is "hazardous" translated as "dangerous" ("bīstamo") in "hazardous and/or inedible substances"??
LV	hazard	18	8. Hazardous and/or inedible substances, including animal feed, are to be adequately labelled and stored in separate and secure containers.	8. Bīstamas un/vai neēdamas vielas, tostarp dzīvnieku barība, atbilstoši jāmarķē un jāglabā atsevišķos un drošos konteineros.	Is "hazardous" translated as "dangerous" (" bīstamās") in "hazardous and/or inedible substances"?
Language	Term	Location (doc page)	English	Translation	Observation	EU-FORA fellow reply
LV	risk	11	(e) to ensure that staff handling foodstuffs are in good health and undergo training on health risks;	e) jānodrošina, lai darbinieki, kas apstrādā pārtikas produktus, būtu veseli un apmācīti par veselības apdraudējumiem;	Is "risks" translated as "hazards" ("apdraudējumiem") in "health risks"?
LV	risk	12	(d) to ensure that staff handling foodstuffs are in good health and undergo training on health risks;	d) jānodrošina, lai darbinieki, kas darbojas ar pārtikas produktiem, būtu veseli un apmācīti par veselības apdraudējumiem;	Is "risks" translated as "hazards" ("apdraudējumiem") in "health risks"?
LV	risk	14	8. Drainage facilities are to be adequate for the purpose intended. They are to be designed and constructed to avoid the risk of contamination. Where drainage channels are fully or partially open, they are to be so designed as to ensure that waste does not flow from a contaminated area towards or into a clean area, in particular an area where foods likely to present a high risk to the final consu…	8. Kanalizācijas iekārtām jāatbilst paredzētajam nolūkam. Tās jāprojektē un jāveido tā, lai izvairītos no piesārņojuma riska. Ja kanalizācijas kanāli ir pilnībā vai daļēji atvērti, tie jāprojektē tā, lai atkritumi nenokļūtu no piesārņotas platības uz tīro platību vai tajā, jo īpaši platībās, kur apstrādā pārtiku, kas varētu apdraudēt galapatērētāja veselību.	Is "high risk" translated as "high hazard" ("apdraudē") in "risk of contamination"?
LV	risk	18	5. Raw materials, ingredients, intermediate products and finished products likely to support the reproduction of pathogenic micro-organisms or the formation of toxins are not to be kept at temperatures that might result in a risk to health. The cold chain is not to be interrupted. However, limited periods outside temperature control are permitted, to accommodate the practicalities of handling dur…	5. Izejmateriālus, sastāvdaļas, starpproduktus un gatavus produktus, kas varētu sekmēt patogēnu mikroorganismu vairošanos vai toksīnu veidošanos, nedrīkst uzglabāt temperatūrās, kas varētu radīt draudus veselībai. Nedrīkst pārtraukt aukstuma ķēdi. Tomēr var atļaut ierobežotus periodus ārpus temperatūras kontroles, lai nokārtotu apstrādes praktiskos aspektus sagatavojot, pārvadājot, uzglabājot, iz…	Is "risks" translated as "threats" ("draudus veselībai") in "risk to health"?
LV	risk	18	6. Where foodstuffs are to be held or served at chilled temperatures they are to be cooled as quickly as possible following the heat-processing stage, or final preparation stage if no heat process is applied, to a temperature which does not result in a risk to health.	6. Ja pārtikas produktus uzglabā vai pasniedz atdzesētus, cik iespējams drīz pēc termiskā apstrādes posma vai pēc pēdējā sagatavošanās posma, ja tos nekarsē, tiem jābūt atdzesētiem līdz temperatūrai, kas nevar radīt draudus veselībai.	Is "risks" translated as "threats" ("draudus veselībai") in "risk to health"?
New version
Language	Term	Location (doc page)	English	Translation	Observation	EU-FORA fellow reply
LV	hazard	5	Hazard analysis and critical control points	Riska analīze un kritiskie kontrolpunkti	Is "hazard" translated as "risk" ("riska") in "hazard analysis"?
LV	hazard	11	(c) explain the reasons for the adaptation, including, where relevant, by providing a summary of the hazard analysis carried out and any measures to be taken to ensure that the adaptation will not compromise the objectives of this Regulation;	c) izskaidro pielāgošanas iemeslus, attiecīgā gadījumā sniedzot veiktās riska analīzes kopsavilkumu un veicamos pasākumus, lai nodrošinātu, ka pielāgošana netraucēs šīs regulas mērķu sasniegšanu; un	Is "hazard" translated as "risk" ("riska") in "hazard analysis"?
LV	hazard	14	3. Notwithstanding the general duty laid down in paragraph 2, food business operators are to comply with appropriate Community and national legislative provisions relating to the control of hazards in primary production and associated operations, including:	3. Neatkarīgi no 2. punktā noteiktajiem vispārīgajiem pienākumiem pārtikas apritē iesaistītajiem tirgus dalībniekiem jāizpilda attiecīgi Kopienas un valsts tiesību aktu noteikumi, kas attiecas uz bīstamības kontroli primārajā ražošanā un ar to saistītajās darbībās, ietverot:	Is "hazards" translated as "dangers" ("bīstamības") in "control of hazards"?
LV	hazard	15	(g) to store and handle waste and hazardous substances so as to prevent contamination;	g) atkritumi un bīstamās vielas jāuzglabā un ar tām jārīkojas tā, lai nepieļautu piesārņojumu;	Is "hazardous" translated as "dangerous" (" bīstamās") in "hazardous substances"?
LV	hazard	15	(f) to store and handle wastes and hazardous substances so as to prevent contamination;	f) atkritumi un bīstamās vielas jāuzglabā un ar tām jārīkojas tā, lai nepieļautu piesārņojumu;	Is "hazardous" translated as "dangerous" (" bīstamās") in "hazardous substances"?
LV	hazard	19	(f) adequate arrangements and/or facilities for the hygienic storage and disposal of hazardous and/or inedible substances and waste (whether liquid or solid) are to be available;	f) jābūt pieejamam atbilstošam aprīkojumam un/vai iekārtām bīstamo un/vai neēdamo vielu un atkritumu (šķidro vai cieto) higiēniskai uzglabāšanai un iznīcināšanai;	Is "hazardous" translated as "dangerous" (" bīstamo") in "hazardous and/or inedible substances"?
LV	hazard	23	8. Hazardous and/or inedible substances, including animal feed, are to be adequately labelled and stored in separate and secure containers.	8. Bīstamas un/vai neēdamas vielas, tostarp dzīvnieku barība, atbilstoši jāmarķē un jāglabā atsevišķos un drošos konteineros.	Is "hazardous" translated as "dangerous" (" bīstamās") in "hazardous and/or inedible substances"?
Language	Term	Location (doc page)	English	Translation	Observation	EU-FORA fellow reply
LV	risk	14	(e) to ensure that staff handling foodstuffs are in good health and undergo training on health risks;	e) jānodrošina, lai darbinieki, kas apstrādā pārtikas produktus, būtu veseli un apmācīti par veselības apdraudējumiem;	Is "risks" translated as "hazards" ("apdraudējumiem") in "health risks"?
LV	risk	15	(d) to ensure that staff handling foodstuffs are in good health and undergo training on health risks;	d) jānodrošina, lai darbinieki, kas darbojas ar pārtikas produktiem, būtu veseli un apmācīti par veselības apdraudējumiem;	Is "risks" translated as "hazards" ("apdraudējumiem") in "health risks"?
LV	risk	18	8. Drainage facilities are to be adequate for the purpose intended. They are to be designed and constructed to avoid the risk of contamination. Where drainage channels are fully or partially open, they are to be so designed as to ensure that waste does not flow from a contaminated area towards or into a clean area, in particular an area where foods likely to present a high risk to the final consu…	8. Kanalizācijas iekārtām jāatbilst paredzētajam nolūkam. Tās jāprojektē un jāveido tā, lai izvairītos no piesārņojuma riska. Ja kanalizācijas kanāli ir pilnībā vai daļēji atvērti, tie jāprojektē tā, lai atkritumi nenokļūtu no piesārņotas platības uz tīro platību vai tajā, jo īpaši platībās, kur apstrādā pārtiku, kas varētu apdraudēt galapatērētāja veselību.	Is "risk" translated as "hazard" ("apdraudē") in "high risk"?
LV	risk	23	5. Raw materials, ingredients, intermediate products and finished products likely to support the reproduction of pathogenic micro-organisms or the formation of toxins are not to be kept at temperatures that might result in a risk to health. The cold chain is not to be interrupted. However, limited periods outside temperature control are permitted, to accommodate the practicalities of handling dur…	5. Izejmateriālus, sastāvdaļas, starpproduktus un gatavus produktus, kas varētu sekmēt patogēnu mikroorganismu vairošanos vai toksīnu veidošanos, nedrīkst uzglabāt temperatūrās, kas varētu radīt draudus veselībai. Nedrīkst pārtraukt aukstuma ķēdi. Tomēr var atļaut ierobežotus periodus ārpus temperatūras kontroles, lai nokārtotu apstrādes praktiskos aspektus sagatavojot, pārvadājot, uzglabājot, iz…	Is "risks" translated as "threats" ("draudus") in "health risks")?
LV	risk	23	6. Where foodstuffs are to be held or served at chilled temperatures they are to be cooled as quickly as possible following the heat-processing stage, or final preparation stage if no heat process is applied, to a temperature which does not result in a risk to health.	6. Ja pārtikas produktus uzglabā vai pasniedz atdzesētus, cik iespējams drīz pēc termiskā apstrādes posma vai pēc pēdējā sagatavošanās posma, ja tos nekarsē, tiem jābūt atdzesētiem līdz temperatūrai, kas nevar radīt draudus veselībai.	Is "risks" translated as "threats" ("draudus") in "health risks")?

## Sheet: REG 853-2004
Language	Term	Location (doc page)	English	Translation	Observation	EU-FORA fellow reply
LV	hazard	2	(2) Certain foodstuffs may present specific hazards to human health, requiring the setting of specific hygiene rules. This is particularly the case for food of animal origin, in which microbiological and chemical hazards have frequently been reported.	(2) Konkrēti pārtikas produkti var radīt īpašus draudus cilvēka veselībai, tādēļ ir jāparedz īpaši higiēnas noteikumi. Tas jo īpaši attiecas uz dzīvnieku izcelsmes pārtiku, kurā bieži konstatēti mikrobioloģiski un ķīmiski draudi cilvēka veselībai.	Is "hazards" translated as "threats" ("draudus/draudi")? Should it be a differentiation between hazard and threat?
LV	hazard	2	(7) The requirement in Regulation (EC) No /2004 ∗ whereby food business operators carrying out any stage of production, processing and distribution of food after primary production and associated operations must put in place, implement and maintain procedures based on hazard analysis and critical control point (HACCP) principles also permits simplification	(7) Regulā (EK) Nr. 852/2004 noteikto prasību, saskaņā ar kuru pārtikas apritē iesaistītajiem tirgus dalībniekiem, kas darbojas jebkurā pārtikas ražošanas, pārstrādes un izplatīšanas posmā pēc primārās ražošanas un ar to saistītām darbībām, ir jāievieš, jāpiemēro un jāsaglabā procedūras, kuru pamatā ir kritisko kontroles punktu bīstamības analīzes (HACCP) principi, arī var vienkāršot	Is "hazard" translated as "danger" ("bīstamība")? Should it be a differentiation between hazard and danger?
LV	hazard	3	(22) In order to ensure proper inspection of hunted wild game placed on the Community market, bodies of hunted animals and their viscera should be presented for official post-mortem inspection at a game-handling establishment. However, to preserve certain hunting traditions without prejudicing food safety, it is appropriate to provide for training for hunters who place wild game on the market for…	(22) Lai nodrošinātu pietiekamu to nomedīto savvaļas dzīvnieku pārbaudi, ko laiž Kopienas tirgū, savvaļas dzīvnieku gaļas apstrādes uzņēmumā veic oficiālu nomedīto dzīvnieku ķermeņu un iekšējo orgānu pēckaušanas veterināro ekspertīzi. Tomēr, lai saglabātu dažas medīšanas tradīcijas, neapdraudot pārtikas drošību, ir lietderīgi apmācīt medniekus, kas laiž tirgū savvaļas dzīvnieku gaļu lietošanai pā…	Is "hazards" and "risks" translated as "threats" ("draudus/draudi")? Should it be a differentiation between hazard, risk and threat?
LV	hazard	8	(b) the experience gained from the implementation of HACCP-based systems pursuant to Article 5 of Regulation (EC) No /2004* ;	b) pieredzi, kas gūta, īstenojot uz riska analīzes un kritisko kontrolpunktu noteikšanu (HACCP) balstītas sistēmas saskaņā ar Regulas (EK) Nr. 852/2004 5. pantu;	Is "hazard" within "HACCP-based systems" translated as "risk" ("riska") in "riska analīzes un kritisko kontrolpunktu noteikšanu (HACCP)"?
LV	hazard	8	(c) explain the reasons for the adaptation, including, where relevant, by providing a summary of the hazard analysis carried out and any measures to be taken to ensure that the adaptation will not compromise the objectives of this Regulation; and	c) paskaidro pielāgojumu iemeslus, tostarp attiecīgā gadījumā sniedzot veiktās bīstamības analīzes rezultātu apkopojumu un aprakstot veicamos pasākumus, lai nodrošinātu to, ka minētie pielāgojumi neapdraudēs šīs regulas mērķu sasniegšanu,	Is "hazard" translated as "danger" ("bīstamības") in "hazard analysis"? Is the translation acceptable?
LV	hazard	9	8) to specify criteria for determining when epidemiological data indicate that a fishing ground does not present a health hazard with regard to the presence of parasites and, consequently, for determining when the competent authority may authorise food business operators not to freeze fishery products in accordance with Annex III, Section VIII, Chapter III, Part D;	8) lai precizētu kritērijus noteikšanai, kad epidemioloģiskie dati norāda, ka zvejas vieta nerada draudus veselībai attiecībā uz parazītu klātbūtni, un līdz ar to noteikšanai, kad kompetentā iestāde var ļaut pārtikas apritē iesaistītajiem tirgus dalībniekiem nesasaldēt zvejas produktus saskaņā ar III pielikuma VIII sadaļas III nodaļas D daļu;	Is "hazard" translated as "threat" ("draudus")? Should it be a differentiation between hazard and threat?
LV	hazard	16	1. Food business operators operating slaughterhouses must ensure that the procedures that they have put in place in accordance with the general requirements of Article 5 of Regulation (EC) No …/2004 ∗ meet the requirements that the hazard analysis shows to be necessary and the specific requirements listed in paragraph 2.	1. Pārtikas apritē iesaistītajiem tirgus dalībniekiem, kas vada kautuves, ir jānodrošina, ka procedūras, ko tie ieviesuši saskaņā ar vispārīgām Regulas (EK) Nr. 852/2004 5. panta prasībām, atbilst prasībām, ko saskaņā ar bīstamības analīzi uzskata par vajadzīgām, un īpašajām 2. punktā minētajām prasībām.	Is "hazard" translated as "danger" ("bīstamības") in "hazard analysis"? Is the translation acceptable?
LV	hazard	38	1. The location of premises on land must not be subject to flooding by ordinary high tides or run-off from surrounding areas.	1. Šādu telpu atrašanās vietu uz zemes nedrīkst apdraudēt applūšana parastu paisumu vai apkārtējo teritoriju virszemes noteces ūdeņu dēļ.	Is the word "endanger" ("apdraudēt") used for expressing " must not be subject" in the Latvian version? Is the translation acceptable?
LV	hazard	38	6. Where fish are headed and/or gutted on board, such operations must be carried out hygienically as soon as possible after capture, and the products must be washed immediately and thoroughly with potable water or clean water. In that event, the viscera and parts that may constitute a danger to public health must be removed as soon as possible and kept apart from products intended for human consu…	6. Ja zivīm atdala galvu un/vai tās ķidā uz kuģa klāja, šādas darbības jāveic atbilstoši higiēnas prasībām iespējami drīz pēc nozvejošanas un produkti nekavējoties un kārtīgi jānomazgā ar dzeramo ūdeni vai tīru ūdeni. Šādā gadījumā iekšējie orgāni un daļas, kas var radīt draudus sabiedrības veselībai, iespējami drīz jānošķir un jātur atsevišķi no lietošanai pārtikā paredzētiem produktiem. Aknas u…	Is "danger" translated as "threat" ("apdraudējumu")? Shuld it be a differentiation between danger and threat?
LV	hazard	46	(a) epidemiological data are available indicating that the fishing grounds of origin do not present a health hazard with regard to the presence of parasites; and	a) ir pieejami epidemioloģiskie dati, kas liecina, ka izcelsmes zvejas rajonā nevar būt veselības draudu attiecībā uz parazītu klātbūtni,	Is "hazard" translated as "threat" ("draudu")? Should it be a differentiation between hazard and threat?
LV	hazard	52	(a) have regard to the procedures developed in accordance with the HACCP principles pursuant to Regulation (EC) No ..../2004 ∗ ; and	a) jāņem vērā procedūras, kas izstrādātas saskaņā ar kritisko kontroles punktu bīstamības analīzes (HACCP) principiem atbilstīgi Regulai (EK) Nr. 854/2004,	Is "hazard" within "HACCP-based systems" translated as "danger" ("bīstamība") in "kas izstrādātas saskaņā ar kritisko kontroles punktu bīstamības analīzes (HACCP)"?
LV	hazard	54	5. After breaking, each particle of the egg product must undergo processing as quickly as possible to eliminate microbiological hazards or to reduce them to an acceptable level. A batch that has been insufficiently processed may immediately undergo processing again in the same establishment, if this processing renders it fit for human consumption. When a batch is found to be unfit for human consu…	5. Pēc sasišanas visas olu produkta daļas iespējami drīz jāapstrādā, lai novērstu mikrobioloģiskus draudus vai samazinātu tos līdz pieņemamam līmenim. Nepietiekami apstrādātai partijai var tūlīt apstrādi veikt vēlreiz tajā pašā uzņēmumā, ja pēc atkārtotās apstrādes tā būs derīga lietošanai pārtikā. Ja partiju atzīst par nederīgu lietošanai pārtikā, tā jādenaturē, lai nodrošinātu to, ka partiju ne…	Is "hazard" translated as "threat" ("draudus")? Should it be a differentiation between hazard and threat?
LV	hazard	55	4. Frogs and snails must be subjected to an organoleptic examination carried out by sampling. If that examination indicates that they might present a hazard, they must not be used for human consumption	4. Vardēm un gliemežiem jāveic izlases veida organoleptiskā pārbaude. Ja šajā pārbaudē konstatē, ka konkrētās vardes un gliemeži var būt bīstami, tos nedrīkst lietot pārtikā.	Is "hazard" translated as "danger" ("bīstami") in "present a hazard"?
LV	hazard	55	6. After killing, snails' hepato-pancreas must, if it might present a hazard, be removed and not be used for human consumption.	6. Pēc nogalināšanas gliemežu hepatopankreāts, ja tas var radīt bīstamību, jāizņem un to nedrīkst lietot pārtikā	Is "hazard" translated as "danger" ("bīstamību") in "present a hazard"?
Old version
Language	Term	Location (doc page)	English	Translation	Observation	EU-FORA fellow reply
LV	risk	22	9. When not skinned, porcine animals must have their bristles removed immediately. The risk of contamination of the meat with scalding water must be minimised. Only approved additives may be used for this operation. Porcine animals must be thoroughly rinsed afterwards with potable water.	9. Ja cūkas nedīrā, tās ir nekavējoties jāatsaro. Līdz minimumam ir jāsamazina iespēja gaļu piesārņot ar verdošu ūdeni. Šai darbībai drīkst izmantot tikai apstiprinātas piedevas. Pēc tam cūkas ir rūpīgi jānoskalo ar dzeramo ūdeni.	Is the word "risk" missing in the Latvian version? Is the translation acceptable?
LV	risk	30	2. The trained person must carry out an examination of the body, and of any viscera removed, to identify any characteristics that may indicate that the meat presents a health risk. The examination must take place as soon as possible after killing.	2. Apmācītajai personai ir jāveic nomedītā dzīvnieka ķermeņa un izņemto iekšējo orgānu apskate, lai noteiktu pazīmes, kas var liecināt par to, ka gaļas patērēšana var apdraudēt veselību. Šāda apskate ir jāveic iespējami drīz pēc dzīvnieka nonāvēšanas.	Is "risk" translated as "endanger" ("apdraudēt") in "health risk"?
LV	risk	30	1. The trained person must carry out an examination to identify any characteristics that may indicate that the meat presents a health risk. The examination must take place as soon as possible after killing.	1. Apmācītajai personai ir jāveic pārbaude, lai identificētu pazīmes, kas var liecināt, ka gaļas patērēšana var radīt draudus veselībai. Šāda pārbaude ir jāveic iespējami drīz pēc dzīvnieka nonāvēšanas.	Is "risk" translated as "threat" ("draudus")? Should it be a differentiation between risk and threat?
LV	risk	35	1. Food business operators may use only those areas that the competent authority has approved for relaying live bivalve molluscs. Buoys, poles or other fixed means must clearly identify the boundaries of the sites. There must be a minimum distance between relaying areas, and also between relaying areas and production areas, so as to minimise any risk of the spread of contamination.	1. Pārtikas apritē iesaistītie tirgus dalībnieki var izmantot tikai tos apgabalus, ko kompetentā iestāde ir apstiprinājusi dzīvu gliemeņu izklāšanai. Šo vietu robežām jābūt skaidri norādītām ar bojām, pāļiem vai citiem stacionāriem līdzekļiem. Starp izklāšanas apgabaliem un arī starp izklāšanas un ražošanas apgabaliem jābūt vismaz nelielam attālumam, lai samazinātu piesārņojuma izplatīšanās iespē…	Is the word "risk" missing in the Latvian version? Is the translation acceptable?
LV	risk	47	(b) is stored in such a manner that it is not exposed to a risk of contamination;	b) tiek uzglabāts tā, ka nav pakļauts iespējamam piesārņojumam;	Is the word "risk" missing in the Latvian version? Is the translation acceptable?
New version
Language	Term	Location (doc page)	English	Translation	Observation	EU-FORA fellow reply
LV	hazard	12	(c) explain the reasons for the adaptation, including, where relevant, by providing a summary of the hazard analysis carried out and any measures to be taken to ensure that the adaptation will not compromise the objectives of this Regulation;	c) paskaidro pielāgojumu iemeslus, tostarp attiecīgā gadījumā sniedzot veiktās bīstamības analīzes rezultātu apkopojumu un aprakstot veicamos pasākumus, lai nodrošinātu to, ka minētie pielāgojumi neapdraudēs šīs regulas mērķu sasniegšanu,	Is "hazard" translated as "danger" ("bīstamība") in "hazard analysis"?
LV	hazard	21	1. Food business operators operating slaughterhouses must ensure that the procedures that they have put in place in accordance with the general requirements of Article 5 of Regulation (EC) No 852/2004 meet the requirements that the hazard analysis shows to be necessary and the specific requirements listed in point 2.	1. Pārtikas apritē iesaistītajiem tirgus dalībniekiem, kas vada kautuves, ir jānodrošina, ka procedūras, ko tie ieviesuši saskaņā ar vispārīgām Regulas (EK) Nr. 852/2004 5. panta prasībām, atbilst prasībām, ko saskaņā ar bīstamības analīzi uzskata par vajadzīgām, un īpašajām 2. punktā minētajām prasībām.	Is "hazard" translated as "danger" ("bīstamība") in "hazard analysis"?
LV	hazard	25	1. During collection and transport, animals must be handled carefully without causing unnecessary distress.	1. Dzīvniekus savācot un pārvadājot, ar tiem jāapietas uzmanīgi un neradot nevajadzīgus draudus.	Is the word "threat" ("draudus") used for expressing "without causing unnecessary distress" in the Latvian version? Is the translation acceptable?
LV	hazard	25	1. (a) Slaughterhouses must have adequate and hygienic lairage facilities or, climate permitting, waiting pens that are easy to clean and disinfect. These facilities must be equipped for watering the animals and, if necessary, feeding them. The drainage of the wastewater must not compromise food safety	1. a) Kautuvēs ir jābūt piemērotām un higiēnas prasībām atbilstošām pirmskaušanas novietnēm vai, ja klimats ir piemērots, pagaidu uzturēšanās aplokiem, ko var viegli iztīrīt un dezinficēt. ►C1 Minētajām novietnēm ir jābūt aprīkotām ar iekārtām dzīvnieku dzirdināšanai un, vajadzības gadījumā, ēdināšanai. ◄ Notekūdeņu novadīšanas sistēma nedrīkst radīt draudus pārtikas drošībai;	Is the word "threat" ("draudus") used for expressing "must not compromise" in the Latvian version? Is the translation acceptable?
LV	hazard	33	(i) the temperature is monitored and recorded within the framework of procedures based on the HACCP principles;	i) temperatūra tiek kontrolēta un reģistrēta tādu procedūru gaitā, kuru pamatā ir riska analīzes un kritisko kontrolpunktu noteikšanas (HACCP) princip	Is "hazard" translated as "risk" ("riska") in "HACC principles"?
LV	hazard	52	(iii) steaming under pressure in an enclosed space satisfying the requirements relating to cooking time and the internal temperature of the mollusc flesh mentioned under (i). A validated methodology must be used. Procedures based on the HACCP principles must be in place to verify the uniform distribution of heat.	iii) tvaicēšanu zem spiediena noslēgtā traukā, kas atbilst prasībām par sagatavošanas laiku un i) daļā minēto gliemeņu gaļas iekšējo temperatūru. Jāizmanto apstiprināta metodika. Lai pārbaudītu, vai karstums sadalās vienmērīgi, jāizmanto procedūras, kuru pamatā ir riska analīzes un kritisko kontrolpunktu noteikšanas (HACCP) principi.	Is "hazard" translated as "risk" ("riska") in "HACCP principles"?
LV	hazard	53	1. The location of premises on land must not be subject to flooding by ordinary high tides or run-off from surrounding areas.	1. Šādu telpu atrašanās vietu uz zemes nedrīkst apdraudēt applūšana parastu paisumu vai apkārtējo teritoriju virszemes noteces ūdeņu dēļ	Is the word "endanger" ("apdraudēt") used for expressing "must not compromise" in the Latvian version? Is the translation acceptable?
LV	hazard	63	6. Where fish are headed and/or gutted on board, such operations must be carried out hygienically as soon as possible after capture, and the products must be washed immediately and thoroughly with potable water or clean water. In that event, the viscera and parts that may constitute a danger to public health must be removed as soon as possible and kept apart from products intended for human consu…	6. Ja zivīm atdala galvu un/vai tās ķidā uz kuģa klāja, šādas darbības jāveic atbilstoši higiēnas prasībām iespējami drīz pēc nozvejošanas un produkti nekavējoties un kārtīgi jānomazgā ar dzeramo ūdeni vai tīru ūdeni. Šādā gadījumā iekšējie orgāni un daļas, kas var radīt draudus sabiedrības veselībai, iespējami drīz jānošķir un jātur atsevišķi no lietošanai pārtikā paredzētiem produktiem. Aknas u…	Is "danger" translated as "threat" ("apdraudējumu")? Should it be a differentiation between danger and threat?
LV	hazard	53	(i) there are epidemiological data available indicating that the fishing grounds of origin do not present a health hazard with regard to the presence of parasites; and	i) ir pieejami epidemioloģiskie dati, kuri liecina, ka izcelsmes zvejas vieta nav drauds veselībai attiecībā uz parazītu klātbūtni; un	Is "hazard" translated as "threat" ("drauds") in "health hazard"?
LV	hazard	53	(d) derived from fish farming, cultured from embryos and have been fed exclusively on a diet that cannot contain viable parasites that present a health hazard, and one of the following requirements is complied with:	d) kas ir iegūti zivju audzēšanā, audzēti no embrijiem un baroti tikai ar barību, kurā veselību apdraudošu dzīvotspējīgu parazītu klātbūtne nav iespējama, turklāt ir ievērota viena no šādām prasībām:	Is "hazard" translated as "dangerous" ("apdraudošu") in "health hazard"?
LV	hazard	53	(ii) the food business operator verifies through procedures, approved by the competent authority, that the fishery products do not represent a health hazard with regard to the presence of viable parasites.	ii) pārtikas apritē iesaistītais tirgus dalībnieks, izmantojot kompetentās iestādes apstiprinātas procedūras, pārbauda, vai akvakultūras produkti nerada draudus veselībai attiecībā uz dzīvotspējīgu parazītu klātbūtni.	Is "hazard" translated as "threat" ("draudus") in "health hazard"?
LV	hazard	53	(b) Before placing on the market fishery products referred to in points 3(c) and (d) which have not undergone the freezing treatment or which are not intended to undergo before consumption a treatment that kills viable parasites that present a health hazard, a food business operator must ensure that the fishery products originate from a fishing ground or fish farming which complies with the speci…	b) pirms laist tirgū 3. punkta c) un d) apakšpunktā minētos zivsaimniecības produktus, kam nav veikta apstrāde ar sasaldēšanu vai ko pirms patērēšanas nav paredzēts apstrādāt, iznīcinot dzīvotspējīgus parazītus, kuri rada draudus veselībai, pārtikas apritē iesaistītajam tirgus dalībniekam jāgarantē, ka zivsaimniecības produkti ir cēlušies no zvejas vietas vai zivaudzētavas, kas atbilst vienā no š…	Is "hazard" translated as "threat" ("draudus") in "health hazard"?
LV	hazard	77	5. After breaking, each particle of the liquid egg must undergo processing as quickly as possible to eliminate microbiological hazards or to reduce them to an acceptable level. A batch that has been insufficiently processed may immediately undergo processing again in the same establishment if this processing renders it fit for human consumption. Where a batch is found to be unfit for human consum…	5. Pēc sasišanas visas šķidrās olas daļas iespējami drīz jāapstrādā, lai novērstu mikrobioloģiskus draudus vai samazinātu tos līdz pieņemamam līmenim. Nepietiekami apstrādātai partijai var tūlīt apstrādi veikt vēlreiz tajā pašā uzņēmumā, ja pēc atkārtotās apstrādes tā būs derīga lietošanai pārtikā. Ja partiju atzīst par nederīgu lietošanai pārtikā, tā jādenaturē, lai nodrošinātu to, ka partiju ne…	Is "hazard" translated as "threat" ("draudus") in "microbiological hazards"?
LV	hazard	78	4. Frogs and snails must be subjected to an organoleptic examination carried out by sampling. If that examination indicates that they might present a hazard, they must not be used for human consumption	4. Vardēm un gliemežiem jāveic izlases veida organoleptiskā pārbaude. Ja šajā pārbaudē konstatē, ka konkrētās vardes un gliemeži var būt bīstami, tos nedrīkst lietot pārtikā.	Is "hazard" translated as "danger" ("bīstami") in "present a hazard"?
LV	hazard	78	6. After killing, snails' hepato-pancreas must, if it might present a hazard, be removed and not be used for human consumption.	6. Pēc nogalināšanas gliemežu hepatopankreāts, ja tas var radīt bīstamību, jāizņem un to nedrīkst lietot pārtikā.	Is "hazard" translated as "danger" ("bīstami") in "present a hazard"?
Language	Term	Location (doc page)	English	Translation	Observation	EU-FORA fellow reply
LV	risk	28	9. When not skinned, porcine animals must have their bristles removed immediately. The risk of contamination of the meat with scalding water must be minimised. Only approved additives may be used for this operation. Porcine animals must be thoroughly rinsed afterwards with potable water.	Ja cūkas nedīrā, tās ir nekavējoties jāatsaro. ►C1 Līdz minimumam ir jāsamazina iespēja gaļu piesārņot ar plaucējamo ūdeni. ◄ Šai darbībai drīkst izmantot tikai apstiprinātas piedevas. Pēc tam cūkas ir rūpīgi jānoskalo ar dzeramo ūdeni.	Is the word "risk" missing in the Latvian version? Is the translation acceptable?
LV	risk	42	2. The trained person must carry out an examination of the body, and of any viscera removed, to identify any characteristics that may indicate that the meat presents a health risk. The examination must take place as soon as possible after killing.	2. Apmācītajai personai ir jāveic nomedītā dzīvnieka ķermeņa un izņemto iekšējo orgānu apskate, lai noteiktu pazīmes, kas var liecināt par to, ka gaļas patērēšana var apdraudēt veselību. Šāda apskate ir jāveic iespējami drīz pēc dzīvnieka nonāvēšanas.	Is "risk" translated as "endanger" ("apdraudēt") in "health risk?
LV	risk	53	1. Food business operators may use only those areas that the competent authority has approved for relaying live bivalve molluscs. Buoys, poles or other fixed means must clearly identify the boundaries of the sites. There must be a minimum distance between relaying areas, and also between relaying areas and production areas, so as to minimise any risk of the spread of contamination.	1. Pārtikas apritē iesaistītie tirgus dalībnieki var izmantot tikai tos apgabalus, ko kompetentā iestāde ir apstiprinājusi dzīvu gliemeņu izklāšanai. Šo vietu robežām jābūt skaidri norādītām ar bojām, pāļiem vai citiem stacionāriem līdzekļiem. Starp izklāšanas apgabaliem un arī starp izklāšanas un ražošanas apgabaliem jābūt vismaz nelielam attālumam, lai samazinātu piesārņojuma izplatīšanās iespē…	Is the word "risk" missing in the Latvian version? Is the translation acceptable?
LV	risk	66	must ensure that the raw material or finished product undergo a freezing treatment in order to kill viable parasites that may be a risk to the health of the consumer.	ir jānodrošina izejvielas vai gatavā produkta apstrāde, to sasaldējot, lai iznīcinātu dzīvotspējīgus parazītus, kas var apdraudēt patērētāju veselību.	Is "risk" translated as "endanger" ("apdraudēt") in "health risk?
LV	risk	68	(b) is stored in such a manner that it is not exposed to a risk of contamination;	b) tiek uzglabāts tā, ka nav pakļauts iespējamam piesārņojumam;	Is the word "risk" missing in the Latvian version? Is the translation acceptable?

## Sheet: REG 625-2017
Old version
Language	Term	Location (doc page)	English	Translation	Observation	EU-FORA fellow reply
LV	hazard	-	-	-	-	-
Language	Term	Location (doc page)	English	Translation	Observation	EU-FORA fellow reply
LV	risk	-	-	-	-	-
New version
Language	Term	Location (doc page)	English	Translation	Observation	EU-FORA fellow reply
LV	hazard	31	(2) Regulation (EU) No 649/2012 of the European Parliament and of the Council of 4 July 2012 concerning the export and import of hazardous chemicals (OJ L 201, 27.7.2012, p. 60).	2) Eiropas Parlamenta un Padomes Regula (ES) Nr. 649/2012 (2012. gada 4. jūlijs) par bīstamo ķīmisko vielu eksportu un importu (OV L 201, 27.7.2012., 60. lpp.).	Is "hazardous" translated as "dangerous" ("bīstamo") in "hazardous chemicals"?
Language	Term	Location (doc page)	English	Translation	Observation	EU-FORA fellow reply
LV	risk	-	-	-	-	-

## Sheet: REG 1381-2019
Single version
Language	Term	Location (doc page)	English	Translation	Observation	EU-FORA fellow reply
LV	hazard	-	-	-	-	-
Language	Term	Location (doc page)	English	Translation	Observation	EU-FORA fellow reply
LV	risk	-	-	-	-	-
