# Supplementary material for: Food Risk Analysis: Towards a Better Understanding of „Hazard” and „Risk” in EU food legislation
Source: Preprints.org preprint supplement (doi:10.20944/preprints202306.1556.v1), 2023-06-21
Supplement: Supplementary file 20 [file MT.xlsx]

## Sheet: REG 178-2002
Old version
Language	Term	Location (doc page)	English	Translation	Observation	EFSA Focal Point
MT	hazard	3	(28) Experience has shown that the functioning of the internal market in food or feed can be jeopardised where it is impossible to trace food and feed. It is therefore necessary to establish a comprehensive system of traceability within food and feed businesses so that targeted and accurate withdrawals can be undertaken or information given to consumers or control officials, thereby avoiding the …	(10) L-esperjenza wriet li huwa meħtieġ li jiġu adottati miżuri mmirati biex jiggarantixxu li ikel perikoluż ma jitqiegħedx fis-suq u li jiġi żgurat li jeżistu sistemi biex jidentifikaw u jirrispondu għall-problemi tas-sigurtà ta’ l-ikel biex jiġi żgurat it-tħaddim kif imiss tas-suq intern u l-protezzjoni tas-saħħa umana. Kwistjonijiet simili dwar is-sigurtà ta’ l-għalf għandhom ukoll jiġu ndiriz…	Is "unsafe" translated as "hazardous" ("perikoluż")? Is the translation acceptable?
Language	Term	Location (doc page)	English	Translation	Observation	EFSA Focal Point
MT	risk	-	-	-	-	-
New version
Language	Term	Location (doc page)	English	Translation	Observation	EFSA Focal Point
MT	hazard	-	-	-	-	-
Language	Term	Location (doc page)	English	Translation	Observation	EFSA Focal Point
MT	risk	-	-	-	-	-

## Sheet: REG 852-2004
Old version
Language	Term	Location (doc page)	English	Translation	Observation	EFSA Focal Point
MT	hazard	-	-	-	-	-
Language	Term	Location (doc page)	English	Translation	Observation	EFSA Focal Point
MT	risk	18	2. Wrapping materials are to be stored in such a manner that they are not exposed to a risk of contamination.	2. Il-materjali tat-tgeżwir għandhom ikunu maħżuna b'tali mod hekk li dan ma jkunux esposti għall-kontaminazzjoni.	Is the word "risk" missing from the Maltese version? Is the translation correct?
New version
Language	Term	Location (doc page)	English	Translation	Observation	EFSA Focal Point
MT	hazard	-	-	-	-	-
Language	Term	Location (doc page)	English	Translation	Observation	EFSA Focal Point
MT	risk	24	2. Wrapping materials are to be stored in such a manner that they are not exposed to a risk of contamination.	2. Il-materjali tat-tgeżwir għandhom ikunu maħżuna b'tali mod hekk li dan ma jkunux esposti għall-kontaminazzjoni.	Is the word "risk" missing from the Maltese version? Is the translation correct?

## Sheet: REG 853-2004
Old version
Language	Term	Location (doc page)	English	Translation	Observation	EFSA Focal Point
MT	hazard	8	(c) explain the reasons for the adaptation, including, where relevant, by providing a summary of the hazard analysis carried out and any measures to be taken to ensure that the adaptation will not compromise the objectives of this Regulation; and	(ċ) jispjega r-raġunijiet għall-adattament, inkluż, meta rilevanti, li jispjega fil-qosor l-analiżi tas-sogru li tkun saret u l-miżuri li jkunu ttieħdu biex jiġi żgurat li l-miżuri ma jikkompromettux il-miri ta' dan ir-Regolament;	Is "hazard" translated with a synonim for "risk" ("tas-sogru")? Is the translation acceptable?
MT	hazard	9	8) to specify criteria for determining when epidemiological data indicate that a fishing ground does not present a health hazard with regard to the presence of parasites and, consequently, for determining when the competent authority may authorise food business operators not to freeze fishery products in accordance with Annex III, Section VIII, Chapter III, Part D;	8. jiġu stabbiliti l-kriterji biex jiġ deċiż meta d-data epidemjoloġika juru li arja ta' sajd ma tippreżentax sogru għassaħħa fir-rigward ta' presenza ta' parassiti, u għalhekk, għad-deċisjoni dwar meta l-awtorità kompetenti tkun tista' tawtorizza l-operaturi fin-negozju ta' l-ikel li ma jiffriżawx prodotti tas-sajd skond l-Anness III, Sezzjoni VIII, Kapitolu III, Parti D;	Is "hazard" translated with a synonim for "risk" ("sogru")? Is the translation acceptable?
MT	hazard	16	1. Food business operators operating slaughterhouses must ensure that the procedures that they have put in place in accordance with the general requirements of Article 5 of Regulation (EC) No …/2004 ∗ meet the requirements that the hazard analysis shows to be necessary and the specific requirements listed in paragraph 2	1. L-operaturi fin-negozju ta' l-ikel li joperaw biċċeriji għandhom jiżguraw li l-proċeduri li huma wettqu skond il-ħtiġiet ġenerali ta' l-Artikolu 5 tar-Regolament (KE) Nru 852/2004 jissodisfaw il-ħtiġiet illi l-analiżi tas-sogru turi li huma neċessarji u l-ħtiġiet speċifiċi elenkati fil-punt 2.	Is "hazard" translated with a synonim for "risk" ("tas-sogru")? Is the translation acceptable?
Language	Term	Location (doc page)	English	Translation	Observation	EFSA Focal Point
MT	risk	8	(d) scientific advice, particularly new risk assessments; (e) microbiological and temperature criteria for foodstuffs; (f) changes in patterns of consumption.	(d) scientific advice, particularly new risk assessments; (e) microbiological and temperature criteria for foodstuffs; (f) changes in patterns of consumption.	Is this part wrongly translated from English to English instead of from English to Maltese?
MT	risk	48	(b) is stored in such a manner that it is not exposed to a risk of contamination;	(b) jinħażen b'mod li ma jiġix espost għall-periklu ta' kontaminazzjoni;	Is "risk" translated as "hazard" ("għall-periklu") in "risk of contamination"?
New version
Language	Term	Location (doc page)	English	Translation	Observation	EFSA Focal Point
MT	hazard	12	(c) explain the reasons for the adaptation, including, where relevant, by providing a summary of the hazard analysis carried out and any measures to be taken to ensure that the adaptation will not compromise the objectives of this Regulation;	(ċ) jispjega r-raġunijiet għall-adattament, inkluż, meta rilevanti, li jispjega fil-qosor l-analiżi tas-sogru li tkun saret u l-miżuri li jkunu ttieħdu biex jiġi żgurat li l-miżuri ma jikkompromettux il-miri ta' dan ir-Regolament;	Is "hazard" translated with a synonim for "risk" ("tas-sogru) in "hazard analysis"?
MT	hazard	21	1. Food business operators operating slaughterhouses must ensure that the procedures that they have put in place in accordance with the general requirements of Article 5 of Regulation (EC) No 852/2004 meet the requirements that the hazard analysis shows to be necessary and the specific requirements listed in point 2.	1. L-operaturi fin-negozju ta' l-ikel li joperaw biċċeriji għandhom jiżguraw li lproċeduri li huma wettqu skond il-ħtiġiet ġenerali ta' l-Artikolu 5 tar-Regolament (KE) Nru 852/2004 jissodisfaw il-ħtiġiet illi l-analiżi tas-sogru turi li huma neċessarji u l-ħtiġiet speċifiċi elenkati fil-punt 2	Is "hazard" translated with a synonim for "risk" ("tas-sogru) in "hazard analysis"?
MT	hazard	63	6. Where fish are headed and/or gutted on board, such operations must be carried out hygienically as soon as possible after capture, and the fishery products must be washed immediately. The viscera and parts that may constitute a danger to public health must be removed as soon as possible and kept apart from fishery products intended for human consumption. Livers and roes intended for human consu…	6. Meta l-ħut jinqatagħlu rasu u/jew jitnaddaf abbord, dawn l-operazzjonijiet iridu jitwettqu iġenikament kemm jista’ jkun malajr wara l-qbid, u lprodotti tas-sajd iridu jinħaslu immedjatament. Il-vixxri u l-partijiet li jistgħu jkunu ta’ periklu għas-saħħa pubblika jridu jitneħħew kemm jista’ jkun malajr u jinżammu apparti mill-prodotti tas-sajd maħsuba għall-konsum mill-bniedem. Il-fwied u l-ba…	Is "danger" translated as "hazard" ("periklu")? Should it be a differentiation between danger and hazard?
Language	Term	Location (doc page)	English	Translation	Observation	EFSA Focal Point
MT	risk	68	(b) is stored in such a manner that it is not exposed to a risk of contamination;	(b) jinħażen b'mod li ma jiġix espost għall-periklu ta' kontaminazzjoni;	Is "risk" translated as "hazard" ("periklu") in "risk of contamination"?

## Sheet: REG 625-2017
Old version
Language	Term	Location (doc page)	English	Translation	Observation	EFSA Focal Point
MT	hazard	29	(d) an assessment of procedures on good manufacturing practices, good hygiene practices, good farming practices, and of procedures based on the principles of hazard analysis critical control points (HACCP);	(d) valutazzjoni tal-proċeduri fir-rigward ta' prattiki ta' manifattura tajba, prattiki tal-iġjene tajba, prattiki ta' biedja tajba, u tal-proċeduri ibbażati fuq il-prinċipji ta' punti kritiċi ta' kontroll u analiżi tar-riskji (HACCP);	Is "hazard" translated as "risk" ("riscurilor") in "risk analysis"?
MT	hazard	63	(b) treatment in any other manner suitable for safe animal or human consumption or for purposes other than animal or human consumption.	(b) it-trattament f'kull mod ieħor xieraq għall-konsum bla periklu mill-annimali jew il-bniedem jew għall-finijiet li mhumiex il-konsum mill_x0002_annimali jew il-bniedem.	Is the word "hazard" "("periklu") used for expressing "suitable for safe animal or human consumption"? Is the translation acceptable?
Language	Term	Location (doc page)	English	Translation	Observation	EFSA Focal Point
MT	risk	31	(ii) safe removal of specified risk material, and	(ii) it-tneħħija bla periklu ta' materjal speċifikat ta' riskju, u	Is "risk" translated as "hazard" ("periklu") in "risk material"?
New version
Language	Term	Location (doc page)	English	Translation	Observation	EFSA Focal Point
MT	hazard	18	(d) an assessment of procedures on good manufacturing practices, good hygiene practices, good farming practices, and of procedures based on the principles of hazard analysis critical control points (HACCP);	(d) valutazzjoni tal-proċeduri fir-rigward ta' prattiki ta' manifattura tajba, prattiki tal-iġjene tajba, prattiki ta' biedja tajba, u tal-proċeduri ibbażati fuq il-prinċipji ta' punti kritiċi ta' kontroll u analiżi tar-riskji (HACCP);	Was "hazard" translated as "risk"("tar-riskji") in "risk analysis"?
MT	hazard	20	(ii) safe removal of specified risk material, and	(ii) it-tneħħija bla periklu ta' materjal speċifikat ta' riskju, u	Is the word hazard" ("periklu") used for the translation of "safe removal" ? Is the translation acceptable?
MT	hazard	65	treatment in any other manner suitable for safe animal or human consumption or for purposes other than animal or human consumption.	it-trattament f'kull mod ieħor xieraq għall-konsum bla periklu mill-annimali jew il-bniedem jew għall-finijiet li mhumiex il-konsum mill_x0002_annimali jew il-bniedem.	Is "safe" translated as "hazard" "("periklu") in "safe animal"?
Language	Term	Location (doc page)	English	Translation	Observation	EFSA Focal Point
MT	risk	-	-	-	-	-

## Sheet: REG 1381-2019
Single version
Language	Term	Location (doc page)	English	Translation	Observation	EFSA Focal Point
MT	hazard	-	-	-	-	-
Language	Term	Location (doc page)	English	Translation	Observation	EFSA Focal Point
MT	risk	-	-	-	-	-
