# Supplementary material for: Food Risk Analysis: Towards a Better Understanding of „Hazard” and „Risk” in EU food legislation
Source: Preprints.org preprint supplement (doi:10.20944/preprints202306.1556.v1), 2023-06-21
Supplement: Supplementary file 21 [file NL.xlsx]

## Sheet: REG 178-2002
Old version
Language	Term	Location (doc page)	English	Translation	Observation	EU-FORA fellow reply
NL	hazard	5	(59) A system for rapid alert already exists in the framework of Council Directive 92/59/EEC of 29 June 1992 on general product safety (1). The scope of the existing system includes food and industrial products but not feed. Recent food crises have demonstrated the need to set up an improved and broadened rapid alert system covering food and feed. This revised system should be managed by the Comm…	(59) Er bestaat al een systeem voor snelle waarschuwing in het kader van Richtlĳn 92/59/EEG van de Raad van 29 juni 1992 inzake algemene productveiligheid (1). Onder dit systeem vallen levensmiddelen en industriële producten, maar geen diervoeders. Uit recente voedselcrises is gebleken dat er een verbeterd en verruimd systeem voor snelle waarschuwing moet worden opgezet dat levensmiddelen en dier…	Is "emergency" translated as "hazard" ("fare") in " radiological emergency"? Is the translation acceptable?
Language	Term	Location (doc page)	English	Translation	Observation	EU-FORA fellow reply
NL	risk	-	-	-	-	-
New version
Language	Term	Location (doc page)	English	Translation	Observation	EU-FORA fellow reply
NL	hazard	-	-	-	-	-
Language	Term	Location (doc page)	English	Translation	Observation	EU-FORA fellow reply
NL	risk	-	-	-	-	-

## Sheet: REG 852-2004
Old version
Language	Term	Location (doc page)	English	Translation	Observation	EU-FORA fellow reply
NL	hazard	4	(11) The application of hazard analysis and critical control point (HACCP) principles to primary production is not yet generally feasible. However, guides to good practice should encourage the use of appropriate hygiene practices at farm level. Where necessary, specific hygiene rules for primary production should supplement these guides. It is appropriate for the hygiene requirements applicable t…	(11) Het is nog niet algemeen haalbaar de HACCP-beginselen toe te passen op de primaire productie. Door middel van gidsen voor goede praktijken moet het gebruik van passende hygiënepraktijken op boerderijen echter gestimuleerd worden. Zo nodig moeten deze gidsen worden aangevuld met specifieke hygiënevoorschriften voor de primaire productie. Het is passend dat de hygiënevoorschriften voor de prim…	Is the syntagm "hazard analysis and critical control point" missing in the Dutch version? Is it acceptable?
NL	hazard	15	Hazard analysis and critical control points	Risicoanalyse en kritische controlepunten	Is "hazard" translated as "risk" ("Risicoanalyse") in "hazard analysis"?
NL	hazard	26	(c) explain the reasons for the adaptation, including, where relevant, by providing a summary of the hazard analysis carried out and any measures to be taken to ensure that the adaptation will not compromise the objectives of this Regulation;	c) de motivering van de aanpassing (waaronder, zo nodig, een samenvatting van de risicoanalyse en van de maatregelen die genomen moeten worden om ervoor te zorgen dat de aanpassing de doelstellingen van deze verordening niet in het gedrang brengt),	Is "hazard" translated as "risk" ("Risicoanalyse") in "hazard analysis"?
Language	Term	Location (doc page)	English	Translation	Observation	EU-FORA fellow reply
NL	risk	46	5. Where conveyances and/or containers have been used for transporting anything other than foodstuffs or for transporting different foodstuffs, there is to be effective cleaning between loads to avoid the risk of contamination.	5. Vervoermiddelen en/of recipiënten die worden gebruikt voor het vervoer van andere producten dan levensmiddelen of voor het vervoer van verschillende levensmiddelen, moeten tussen de verschillende vrachten afdoende worden schoongemaakt om verontreiniging te vermijden.	Is the word "risk" missing from the Dutch version? Is the translation correct?
NL	risk	47	(a) be effectively cleaned and, where necessary, disinfected. Cleaning and disinfection are to take place at a frequency sufficient to avoid any risk of contamination;	a) afdoende worden schoongemaakt en zo nodig ontsmet. Het schoonmaken en ontsmetten moeten zo frequent plaatsvinden dat elk gevaar van verontreiniging wordt vermeden;	Is"risk" translated as " hazard" ("gevaar van verontreiniging") in "risk of contamination"?
New version
Language	Term	Location (doc page)	English	Translation	Observation	EU-FORA fellow reply
NL	hazard	5	Hazard analysis and critical control points	Risicoanalyse en kritische controlepunten	Is "hazard" translated as "risk" ("Risicoanalyse") in "hazard analysis"?
NL	hazard	10	(c) explain the reasons for the adaptation, including, where relevant, by providing a summary of the hazard analysis carried out and any measures to be taken to ensure that the adaptation will not compromise the objectives of this Regulation;	c) de motivering van de aanpassing (waaronder, zo nodig, een samenvatting van de risicoanalyse en van de maatregelen die genomen moeten worden om ervoor te zorgen dat de aanpassing de doelstellingen van deze verordening niet in het gedrang brengt),	Is "hazard" translated as "risk" ("Risicoanalyse") in "hazard analysis"?
Language	Term	Location (doc page)	English	Translation	Observation	EU-FORA fellow reply
NL	risk	20	5. Where conveyances and/or containers have been used for transporting anything other than foodstuffs or for transporting different foodstuffs, there is to be effective cleaning between loads to avoid the risk of contamination.	5. Vervoermiddelen en/of recipiënten die worden gebruikt voor het vervoer van andere producten dan levensmiddelen of voor het vervoer van verschillende levensmiddelen, moeten tussen de verschillende vrachten afdoende worden schoongemaakt om verontreiniging te vermijden.	Is the word "risk" missing from the Dutch version? Is the translation correct?
NL	risk	20	(a) be effectively cleaned and, where necessary, disinfected. Cleaning and disinfection are to take place at a frequency sufficient to avoid any risk of contamination;	a) afdoende worden schoongemaakt en zo nodig ontsmet. Het schoonmaken en ontsmetten moeten zo frequent plaatsvinden dat elk gevaar van verontreiniging wordt vermeden;	Is"risk" translated as " hazard" ("gevaar van verontreiniging") in "risk of contamination"?

## Sheet: REG 853-2004
Old version
Language	Term	Location (doc page)	English	Translation	Observation	EU-FORA fellow reply
NL	hazard	3	(7) The requirement in Regulation (EC) No /2004 ∗ whereby food business operators carrying out any stage of production, processing and distribution of food after primary production and associated operations must put in place, implement and maintain procedures based on hazard analysis and critical control point (HACCP) principles also permits simplification	(7) Ook de eis van Verordening (EG) nr. .../2004 * dat exploitanten van een levensmiddelenbedrijf die zich bezighouden met een op de primaire productie volgende fase van de productie, de verwerking en de distributie van levensmiddelen en de daarmee verband houdende handelingen, dienen te zorgen voor de invoering, de uitvoering en de handhaving van procedures die gebaseerd zijn op risicoanalyse en…	Is "hazard" translated as "risk" ("risicoanalyse") in "hazard analysis and critical control point (HACCP)"?
NL	hazard	8	(22) In order to ensure proper inspection of hunted wild game placed on the Community market, bodies of hunted animals and their viscera should be presented for official post-mortem inspection at a game-handling establishment. However, to preserve certain hunting traditions without prejudicing food safety, it is appropriate to provide for training for hunters who place wild game on the market for…	(22) Opdat gejaagd wild dat op de communautaire markt wordt aangeboden behoorlijk gekeurd wordt, moeten de kadavers van gejaagde dieren mét de ingewanden voor een officiële postmortemkeuring bij een wildbewerkingsinrichting worden aangeboden. Om bepaalde jachttradities te behouden zonder de voedselveiligheid in gevaar te brengen, moet worden voorzien in een opleiding voor jagers die vrij wild voo…	Is the word "hazard" ("gevaar") used for expressing "prejudicing" in the Italian version? Is the translation acceptable?
NL	hazard	26	(c) explain the reasons for the adaptation, including, where relevant, by providing a summary of the hazard analysis carried out and any measures to be taken to ensure that the adaptation will not compromise the objectives of this Regulation; and	c) de motivering van de aanpassing (waaronder, zo nodig, een samenvatting van de risicoanalyse en van de maatregelen die ervoor zorgen dat de aanpassing de doelstellingen van deze verordening niet in het gedrang brengt); en	Is "hazard" translated as "risk" ("risicoanalyse") in "hazard analysis"?
NL	hazard	43	1. Food business operators operating slaughterhouses must ensure that the procedures that they have put in place in accordance with the general requirements of Article 5 of Regulation (EC) No …/2004 ∗ meet the requirements that the hazard analysis shows to be necessary and the specific requirements listed in paragraph 2.	1. Exploitanten van een levensmiddelenbedrijf die een slachthuis beheren, zorgen ervoor dat de procedures die zij hebben ingevoerd in overeenstemming met de algemene eisen van artikel 5 van Verordening (EG) nr. .../2004 * voldoen aan de eisen die blijkens de risico-analyse noodzakelijk zijn, alsook aan de specifieke eisen vermeld onder punt 2.	Is "hazard" translated as "risk" ("risicoanalyse") in "hazard analysis"?
NL	hazard	63	6. Where fish are headed and/or gutted on board, such operations must be carried out hygienically as soon as possible after capture, and the products must be washed immediately and thoroughly with potable water or clean water. In that event, the viscera and parts that may constitute a danger to public health must be removed as soon as possible and kept apart from products intended for human consu…	6. Wanneer de vis aan boord wordt ontkopt en/of gestript, moeten die bewerkingen zo snel mogelijk na het vangen onder hygiënische omstandigheden worden uitgevoerd en moeten de producten onmiddellijk en grondig met drinkwater of schoon water worden afgespoeld. De ingewanden en de delen van de vis die een gevaar kunnen vormen voor de volksgezondheid moeten in dat geval zo spoedig mogelijk worden ve…	Is "danger" translated as "hazard" ("gevaar")? Should it be a differentiation between danger and threat?
NL	hazard	134	5. After breaking, each particle of the egg product must undergo processing as quickly as possible to eliminate microbiological hazards or to reduce them to an acceptable level. A batch that has been insufficiently processed may immediately undergo processing again in the same establishment, if this processing renders it fit for human consumption. When a batch is found to be unfit for human consu…	5. Na het breken moeten alle delen van de eiproducten zo spoedig mogelijk worden verwerkt om elk microbiologisch risico uit te sluiten of tot een aanvaardbaar niveau te beperken. Een partij die niet op afdoende wijze is verwerkt, mag onverwijld een nieuwe verwerking ondergaan in dezelfde inrichting, op voorwaarde dat deze verwerking de partij geschikt maakt voor menselijke consumptie. Indien geco…	Is "hazard" translated as "risk" ("risico") in "microbiological hazards"?
NL	hazard	78	4. Frogs and snails must be subjected to an organoleptic examination carried out by sampling. If that examination indicates that they might present a hazard, they must not be used for human consumption	4. Kikkers en slakken moeten steekproefsgewijs organoleptisch worden onderzocht. Indien bij dat onderzoek blijkt dat zij een risico opleveren, mogen zij niet voor menselijke consumptie worden gebruikt	Is "hazard" translated as "risk" ("risico") in "present a hazard"?
NL	hazard	78	6. After killing, snails' hepato-pancreas must, if it might present a hazard, be removed and not be used for human consumption.	6. De hepatopancreas van slakken moet, indien hij een risico kan opleveren, na de slacht worden verwijderd en mag niet voor menselijke consumptie worden gebruikt.	Is "hazard" translated as "risk" ("risico") in "present a hazard"?
Language	Term	Location (doc page)	English	Translation	Observation	EU-FORA fellow reply
NL	risk	117	(b) is stored in such a manner that it is not exposed to a risk of contamination;	b) op zodanige wijze wordt opgeslagen dat het niet kan worden verontreinigd;	Is the word "risk" missing in the Dutch version? Is the translation acceptable?
NL	risk	123	1. Milking equipment, and premises where milk is stored, handled or cooled must be located and constructed so as to limit the risk of contamination of milk.	1. Melkinstallaties en de lokalen waar de melk wordt opgeslagen, gehanteerd of gekoeld, moeten zo zijn gelegen en gebouwd dat het gevaar voor verontreiniging van de melk zoveel mogelijk wordt beperkt.	Is "risk" translated as "hazard" ("gevaar") in "risk of contamination"?
New version
Language	Term	Location (doc page)	English	Translation	Observation	EU-FORA fellow reply
NL	hazard	12	(c) explain the reasons for the adaptation, including, where relevant, by providing a summary of the hazard analysis carried out and any measures to be taken to ensure that the adaptation will not compromise the objectives of this Regulation;	c) de motivering van de aanpassing (waaronder, zo nodig, een samenvatting van de risicoanalyse en van de maatregelen die ervoor zorgen dat de aanpassing de doelstellingen van deze verordening niet in het gedrang brengt),	Is "hazard translated as "risk" ("risicoanalyse") in "hazard analysis"?
NL	hazard	21	1. Food business operators operating slaughterhouses must ensure that the procedures that they have put in place in accordance with the general requirements of Article 5 of Regulation (EC) No 852/2004 meet the requirements that the hazard analysis shows to be necessary and the specific requirements listed in point 2.	1. Exploitanten van een levensmiddelenbedrijf die een slachthuis beheren, zorgen ervoor dat de procedures die zij hebben ingevoerd in overeenstemming met de algemene eisen van artikel 5 van Verordening (EG) nr. 852/2004 voldoen aan de eisen die blijkens de risico-analyse noodzakelijk zijn, alsook aan de specifieke eisen vermeld onder punt 2.	Is "hazard translated as "risk" ("risicoanalyse") in "hazard analysis"?
NL	hazard	38	6. Where fish are headed and/or gutted on board, such operations must be carried out hygienically as soon as possible after capture, and the products must be washed immediately and thoroughly with potable water or clean water. In that event, the viscera and parts that may constitute a danger to public health must be removed as soon as possible and kept apart from products intended for human consu…	6. Wanneer de vis aan boord wordt ontkopt en/of gestript, moeten die bewerkingen zo snel mogelijk na het vangen onder hygiënische omstandigheden worden uitgevoerd en moeten de visserijproducten onmiddellijk worden gewassen. De ingewanden en de delen van de vis die een gevaar kunnen vormen voor de volksgezondheid moeten zo spoedig mogelijk worden verwijderd en gescheiden worden gehouden van voor m…	Is "danger" translated as "hazard" ("gevaar")? Should it be a differentiation between danger and hazard?
NL	hazard	77	5. After breaking, each particle of the liquid egg must undergo processing as quickly as possible to eliminate microbiological hazards or to reduce them to an acceptable level. A batch that has been insufficiently processed may immediately undergo processing again in the same establishment if this processing renders it fit for human consumption. Where a batch is found to be unfit for human consum…	5. Na het breken moeten alle delen van het vloeibaare ei zo spoedig mogelijk worden verwerkt om elk microbiologisch risico uit te sluiten of tot een aanvaardbaar niveau te beperken. Een partij die niet op afdoende wijze is verwerkt, mag onverwijld een nieuwe verwerking ondergaan in dezelfde inrichting, mits deze verwerking de partij geschikt maakt voor menselijke consumptie. Indien wordt geconsta…	Is "hazard translated as "risk" ("risicoanalyse") in "hazard analysis"?
NL	hazard	78	4. Frogs and snails must be subjected to an organoleptic examination carried out by sampling. If that examination indicates that they might present a hazard, they must not be used for human consumption	4. Kikkers en slakken moeten steekproefsgewijs organoleptisch worden onderzocht. Indien bij dat onderzoek blijkt dat zij een risico opleveren, mogen zij niet voor menselijke consumptie worden gebruikt.	Is "hazard translated as "risk" ("risicoanalyse") in "hazard analysis"?
NL	hazard	78	6. After killing, snails' hepato-pancreas must, if it might present a hazard, be removed and not be used for human consumption.	6. De hepatopancreas van slakken moet, indien hij een risico kan opleveren, na de slacht worden verwijderd en mag niet voor menselijke consumptie worden gebruikt.	Is "hazard translated as "risk" ("risicoanalyse") in "present a hazard"?
Language	Term	Location (doc page)	English	Translation	Observation	EU-FORA fellow reply
NL	risk	65	must ensure that the raw material or finished product undergo a freezing treatment in order to kill viable parasites that may be a risk to the health of the consumer.	moeten erop toezien dat het rauwe materiaal of het eindproduct een vriesbehandeling ondergaat om de levensvatbare parasieten te doden die een gevaar voor de gezondheid van de consument kunnen opleveren	Is "risk" translated as "hazard" ("gevaar") in "risk to health"?
NL	risk	68	(b) is stored in such a manner that it is not exposed to a risk of contamination;	b) op zodanige wijze wordt opgeslagen dat het niet kan worden verontreinigd	Is the word "risk" missing in the Dutch version? Is the translation acceptable?

## Sheet: REG 625-2017
Old version
Language	Term	Location (doc page)	English	Translation	Observation	EU-FORA fellow reply
NL	hazard	2	(6) Transmissible animal diseases, including by micro-organisms that have developed resistance to antimicrobials, may have a significant impact on public health, food and feed safety, and animal health and welfare. In order to ensure high standards of animal and public health in the Union, rules on animal health measures and on feed and food safety are laid down at Union level. Compliance with th…	(6) Overdraagbare dierziekten, onder meer veroorzaakt door micro-organismen die resistent zijn geworden tegen antimicrobiële stoffen, kunnen significante gevolgen hebben voor de volksgezondheid, voedsel- en diervoederveiligheid en diergezondheid en dierenwelzijn. Om in de Unie een hoog niveau van diergezondheid en volksgezondheid te waarborgen, zijn op Unieniveau regels vastgesteld betreffende ma…	Is "threats" translated as "hazard" ("gevaar")?
Language	Term	Location (doc page)	English	Translation	Observation	EU-FORA fellow reply
NL	risk	-	-	-	-
New version
Language	Term	Location (doc page)	English	Translation	Observation	EU-FORA fellow reply
NL	hazard	-	-	-	-	-
Language	Term	Location (doc page)	English	Translation	Observation	EU-FORA fellow reply
NL	risk	-	-	-	-	-

## Sheet: REG 1381-2019
Single version
Language	Term	Location (doc page)	English	Translation	Observation	EU-FORA fellow reply
NL	hazard	-	-	-	-	-
Language	Term	Location (doc page)	English	Translation	Observation	EU-FORA fellow reply
NL	risk	-	-	-	-	-
