# Supplementary material for: Food Risk Analysis: Towards a Better Understanding of „Hazard” and „Risk” in EU food legislation
Source: Preprints.org preprint supplement (doi:10.20944/preprints202306.1556.v1), 2023-06-21
Supplement: Supplementary file 22 [file PL.xlsx]

## Sheet: REG 178-2002
Old version
Language	Term	Location (doc page)	English	Translation	Observation	EU-FORA fellow reply
PL	hazard	5	(59) A system for rapid alert already exists in the framework of Council Directive 92/59/EEC of 29 June 1992 on general product safety (1). The scope of the existing system includes food and industrial products but not feed. Recent food crises have demonstrated the need to set up an improved and broadened rapid alert system covering food and feed. This revised system should be managed by the Comm…	(59) System szybkiego alarmowania już istnieje w ramach dyrektywy Rady 92/59/EWG z dnia 29 czerwca 1992 r. w sprawie ogólnego bezpieczeństwa produktów (1). Zakres istniejącego systemu obejmuje żywność i artykuły przemysłowe, ale nie pasze. Niedawne kryzysy żywnościowe pokazały potrzebę utworzenia ulepszonego i poszerzonego systemu wczesnego ostrzegania o niebezpiecznej żywności i paszach. Ten sko…	Is "emergency" translated as "hazard" ("zagrożeńia") in "radiological emergency"? Is the trannslation acceptable?
Language	Term	Location (doc page)	English	Translation	Observation	EU-FORA fellow reply
PL	risk	2	(15) Networking of laboratories of excellence, at regional and/or interregional level, with the aim of ensuring continuous monitoring of food safety, could play an important role in the prevention of potential health risks for citizens	(15) Sieć najlepszych laboratoriów na poziomie regionalnym i/lub międzyregionalnym, których celem będzie zapewnienie stałego monitorowania bezpieczeństwa żywności, mogłaby odgrywać znaczącą rolę w zapobieganiu potencjalnym zagrożeniom dla zdrowia obywateli.	Is "risk" translated as "hazard" ("zagrożeniom") in "health risks"?
PL	risk	2	(16) Measures adopted by the Member States and the Community governing food and feed should generally be based on risk analysis except where this is not appropriate to the circumstances or the nature of the measure.Recourse to a risk analysis prior to the adoption of such measures should facilitate the avoidance of unjustified barriers to the free movement of foodstuffs.	(16) Środki przyjęte przez Państwa Członkowskie i Wspólnotę, dotyczące żywności ipasz powinny być ogólnie oparte o analizę zagrożeń, poza przypadkami gdzie ze względu na okoliczności lub naturę środka nie jest to odpowiednie.Uciekanie się do analizy zagrożeń przedprzyjęciem takich środków powinno prowadzić do uniknięcia nieuzasadnionych barier w stosunku do swobodnego przepływu środków spożywczyc…	Is "risk" translated as "hazard" ("zagrożeń") in "health risks"?
PL	risk	2	(17) Where food law is aimed at the reduction, elimination or avoidance of a risk to health, the three interconnected components of risk analysis — risk assessment, risk management, and risk communication — provide a systematic methodology for the determination of effective, proportionate and targeted measures or other actions to protect health.	(17) W przypadku gdy prawo żywnościowe ma na celu redukcję, wyeliminowanie lub uniknięcie ryzyka utraty zdrowia, trzy powiązane ze sobą składniki analizy zagrożeń – ocena zagrożeń, zarządzanie zagrożeniami i komunikacja zagrożeń – zapewniają systematyczną metodologię dla określenia efektywnych, współmiernych i skierowanych we właściwym kierunku środków lub innych działań, mających na celu ochronę…	Is "risk" translated as "hazard" ("zagrożeń")in "health risks"?
PL	risk	2	(18) In order for there to be confidence in the scientific basis for food law, risk assessments should be undertaken in an independent, objective and transparent manner, on the basis of the available scientific information and data.	(18) W celu zapewnienia zaufania do bazy naukowej prawa żywnościowego należy podjąć ocenę zagrożeń w niezależny, obiektywny i przejrzysty sposób, na podstawie dostępnych informacji i danych naukowych.	Is "risk" translated as "hazard" ("zagrożeń") in "health risks"?
PL	risk	2	(22) Food safety and the protection of consumer's interests is of increasing concern to the general public, non-governmental organisations, professional associations, international trading partners and trade organisations. It is necessary to ensure that consumer confidence and the confidence of trading partners is secured through the open and transparent development of food law and through public…	Bezpieczeństwo żywności i zabezpieczenie interesów konsumenta coraz bardziej staje się przedmiotem zainteresowania ogółu społeczeństwa, organizacji pozarządowych, stowarzyszeń zawodowych, międzynarodowych partnerów handlowych i organizacji handlowych. Konieczne jest zapewnienie zaufania klienta i zaufania partnerów handlowych poprzez otwarty i zrozumiały rozwój prawa żywnościowego oraz dzięki pod…	Is "risk" translated as "hazard"("zagrożenie") in "health risks"?
PL	risk	4	(37) Since some products authorised under food law such as pesticides or additives in animal feed may involve risks to the environment or to the safety of workers, some environmental and worker protection aspects should also be assessed by the Authority in accordance with the relevant legislation.	(37) Ponieważ niektóre produkty, które uzyskały zezwolenie zgodnie z prawem żywnościowym takie jak pestycydy lub dodatki do pasz zwierzęcych mogą tworzyć zagrożenie dla środowiska lub dla bezpieczeństwa pracowników, Urząd powinien również ocenić pewne aspekty środowiskowe oraz bezpieczeństwa pracy zgodnie z odpowiednim ustawodawstwem.	Is "risk" translated as "hazard" ("zagrożenie") in "health risks?
PL	risk	5	(50) Improved identification of emerging risks may in the long term be a major preventive instrument at the disposal of the Member States and the Community in the exercise of its policies. It is therefore necessary to assign to the Authority an anticipatory task of collecting information and exercising vigilance and providing evaluation of and information on emerging risks with a view to their pr…	(50) Lepsza identyfikacja powstających zagrożeń może być w dłuższym terminie głównym instrumentem zapobiegawczym, który jest do dyspozycji Państw Członkowskich i Wspólnoty w wykonywaniu ich polityki. Dlatego też, konieczne jest wyznaczenie Urzędowi wstępnego zadania zbierania informacji, czujności i zapewniania informacji na temat powstających zagrożeń mając na uwadze ich zapobieganie.	Is "risk" translated as "hazard" ("zagrożeń") in "health risks"?
PL	risk	5	(60) Recent food safety incidents have demonstrated the need to establish appropriate measures in emergency situations ensuring that all foods, whatever their type and origin, and all feed should be subject to common measures in the event of a serious risk to human health, animal health or the environment. Such a comprehensive approach to emergency food safety measures should allow effective acti…	(60) Niedawne wypadki związane z bezpieczeństwem żywności pokazały, że istnieje potrzeba ustanowienia odpowiednich środków w sytuacjach stanu zagrożenia, które zapewniłyby, że wszelka żywność, niezależnie od jej typu i pochodzenia oraz wszelka pasza powinny być poddane wspólnym środkom w przypadku poważnego zagrożenia zdrowia ludzkiego, zdrowia zwierząt lub środowiska naturalnego. Takie całościow…	Is "risk" translated as "hazard" ("zagrożeńia") in "health risks"?
PL	risk	7	11. ‘risk assessment’ means a scientifically based process consisting of four steps: hazard identification, hazard characterisation, exposure assessment and risk characterisation;	11. „ocena ryzyka” oznacza proces wsparty naukowo, składający się z czterech etapów: identyfikacji zagrożenia, charakterystyki niebezpieczeństwa, oceny ekspozycji i charakterystyki ryzyka;	Is "risk" translated as "danger" in "health risks" ("niebezpieczeństwa")? Is the translation acceptable?
PL	risk	8	Without prejudice to the applicable provisions of Community and national law on access to documents, where there are reasonable grounds to suspect that a food or feed may present a risk for human or animal health, then, depending on the nature, seriousness and extent of that risk, public authorities shall take appropriate steps to inform the general public of the nature of the risk to health, ide…	Bez uszczerbku dla stosowania przepisów prawa wspólnotowego i krajowego w sprawie dostępu do dokumentów, w sytuacjach, w których istnieją uzasadnione podstawy, aby podejrzewać, że żywność lub pasza może stanowić zagrożenie dla zdrowia ludzi lub zwierząt, wówczas, w zależności od charakteru, powagi i rozmiaru ryzyka, władze publiczne podejmą stosowne kroki w celu poinformowania opinii publicznej o…	Is "risk" translated as "hazard" ("zagrożenie") in "risk for human"?
PL	risk	12	2. The Authority shall provide scientific advice and scientific and technical support for the Community's legislation and policies in all fields which have a direct or indirect impact on food and feed safety. It shall provide independent information on all matters within these fields and communicate on risks.	2. Urząd ma zapewniać doradztwo naukowe oraz wsparcie naukowo-techniczne w zakresie prawodawstwa i polityki Wspólnoty, we wszystkich dziedzinach, które wywierają bezpośredni lub pośredni wpływ na bezpieczeństwo żywności i pasz.	Is the word "risk" missing from the Polish version? Is the translation acceptable?
PL	risk	13	4. The Authority shall collect and analyse data to allow the characterisation and monitoring of risks which have a direct or indirect impact on food and feed safety.	4. Urząd zbiera i analizuje dane, które umożliwiają przygotowanie charakterystyk i monitorowanie zagrożeń, które wywierają bezpośredni lub pośredni wpływ na bezpieczeństwo żywności i pasz.	Is "risk" translated as "hazard" ("zagrożen") in "monitoring risks"?
PL	risk	15	4. The Advisory Forum shall constitute a mechanism for an exchange of information on potential risks and the pooling of knowledge. It shall ensure close cooperation between the Authority and the competent bodies in the Member States in particular on the following items:	4. Forum doradcze ustanawia mechanizm wymiany informacji o potencjalnych zagrożeniach i dzielenia się wiedzą w tym zakresie. Zapewnia współpracę między Urzędem i właściwymi organami Państw Członkowskich, w szczególności odnośnie do następujących zagadnień:	Is "risk" translated as "hazard" ("zagrożeniach") in "potential risks"?
PL	risk	15	(d) where the Authority or a Member State identifies an emerging risk.	d) w przypadku wykrycia przez Urząd lub Państwo Członkowskie wyłaniającego się zagrożenia.	Is "risk" translated as "hazard" ("zagrożenia") in "emerging risks"?
PL	risk	17	(a) food consumption and the exposure of individuals to risks related to the consumption of food;	a) konsumpcji żywności i podatności osób na zagrożenia związane ze spożywaniem żywności;	Is "risk" translated as "hazard" ("zagrożenia") in "risks related"?
PL	risk	17	(b) incidence and prevalence of biological risk;	b) zasięgu i rozpowszechnienia zagrożeń biologicznych;	Is "risk" translated as "hazard" ("zagrożen") in biological risks"?
PL	risk	18	To enable it to perform its task of monitoring the health and nutritional risks of foods as effectively as possible, the Authority shall be the recipient of any messages forwarded via the rapid alert system. It shall analyse the content of such messages with a view to providing the Commission and the Member States with any information required for the purposes of risk analysis.	W celu stworzenia warunków dla możliwie najefektywniejszego wykonywania przez Urząd zadań monitorowania zdrowia oraz zagrożeń związanych z żywieniem i żywnością, Urząd powinien otrzymywać wszelkie wiadomości poprzez system wczesnego ostrzegania. Urząd analizuje treść tych wiadomości tak, aby dostarczyć Komisji i Państwom Członkowskim wszelkich wymaganych informacji niezbędnych do celów analizy ry…	Is "risk" translated as "hazard" ("zagrożen") in "risk analysis"?
PL	risk	21	1. A rapid alert system for the notification of a direct or indirect risk to human health deriving from food or feed is hereby established as a network. It shall involve the Member States, the Commission and the Authority. The Member States, the Commission and the Authority shall each designate a contact point, which shall be a member of the network. The Commission shall be responsible for managi…	1. Niniejszym ustanawia się jako sieć system wczesnego ostrzegania dla powiadamiania o bezpośrednim lub pośrednim niebezpieczeństwie grożącym zdrowiu ludzkiemu, pochodzącym z żywności lub pokarmu. System obejmuje Państwa Członkowskie, Komisję i Urząd. Każde Państwo Członkowskie, Komisja i Urząd wyznaczą punkt kontaktowy, który będzie członkiem sieci. Komisja jest odpowiedzialna za zarządzanie sie…	Is "risk" translated as "danger" in "health risks" ("niebezpieczeństwie")? Is the translation acceptable?
PL	risk	21	2. Where a member of the network has any information relating to the existence of a serious direct or indirect risk to human health deriving from food or feed, this information shall be immediately notified to the Commission under the rapid alert system. The Commission shall transmit this information immediately to the members of the network.	2. Jeżeli członek sieci posiada jakąkolwiek informację związaną z istnieniem bezpośredniego lub pośredniego niebezpieczeństwa grożącego zdrowiu ludzkiemu, pochodzącego z żywności lub pokarmu, to o takiej informacji natychmiast powiadamia Komisję w ramach systemu wczesnego ostrzegania. Komisja niezwłocznie przekazuje tę informację członkom sieci	Is "risk" translated as "danger" in "health risks" ("niebezpieczeństwa")? Is the translation acceptable?
New version
Language	Term	Location (doc page)	English	Translation	Observation	EU-FORA fellow reply
PL	hazard	-	-	-	-	-
Language	Term	Location (doc page)	English	Translation	Observation	EU-FORA fellow reply
PL	risk	15	4. The Authority shall collect and analyse data to allow the characterisation and monitoring of risks which have a direct or indirect impact on food and feed safety.	4. Urząd zbiera i analizuje dane, które umożliwiają przygotowanie charakterystyk i monitorowanie zagrożeń, które wywierają bezpośredni lub pośredni wpływ na bezpieczeństwo żywności i pasz.	Is "risks" translated as "hazards" ("zagrożeń") in "monitoring of risks"?
PL	risk	19	4. The Advisory Forum shall constitute a mechanism for an exchange of information on potential risks and the pooling of knowledge. It shall ensure close cooperation between the Authority and the competent bodies in the Member States in particular on the following items:	4. Forum doradcze ustanawia mechanizm wymiany informacji o potencjalnych zagrożeniach i dzielenia się wiedzą w tym zakresie. Zapewnia współpracę między Urzędem i właściwymi organami Państw Członkowskich, w szczególności odnośnie do następujących zagadnień:	Is "risks" translated as "hazards" ("zagrożeniach") in "potential risks"?
PL	risk	19	(d) where the Authority or a Member State identifies an emerging risk	d) w przypadku wykrycia przez Urząd lub Państwo Członkowskie wyłaniającego się zagrożenia	Is "risk" translated as "hazard" ("zagrożnia") in "emerging risk"?
PL	risk	26	(a) food consumption and the exposure of individuals to risks related to the consumption of food;	a) konsumpcji żywności i podatności osób na zagrożenia związane ze spożywaniem żywności;	Is "risk" translated as "hazard" ("zagrożnia") in "risks related"?
PL	risk	26	(b) incidence and prevalence of biological risk;	b) zasięgu i rozpowszechnienia zagrożeń biologicznych	Is "risk" translated as "hazard" ("zagrożeń") in "biological risk"?
PL	risk	27	To enable it to perform its task of monitoring the health and nutritional risks of foods as effectively as possible, the Authority shall be the recipient of any messages forwarded via the rapid alert system. It shall analyse the content of such messages with a view to providing the Commission and the Member States with any information required for the purposes of risk analysis.	W celu stworzenia warunków dla możliwie najefektywniejszego wykonywania przez Urząd zadań monitorowania zdrowia oraz zagrożeń związanych z żywieniem i żywnością, Urząd powinien otrzymywać wszelkie wiadomości poprzez system wczesnego ostrzegania. Urząd analizuje treść tych wiadomości tak, aby dostarczyć Komisji i Państwom Członkowskim wszelkich wymaganych informacji niezbędnych do celów analizy ry…	Is "risk" translated as "hazard" ("zagrożeń") in "risk analysis"?
PL	risk	40	1. A rapid alert system for the notification of a direct or indirect risk to human health deriving from food or feed is hereby established as a network. It shall involve the Member States, the Commission and the Authority. The Member States, the Commission and the Authority shall each designate a contact point, which shall be a member of the network. The Commission shall be responsible for managi…	1. Niniejszym ustanawia się jako sieć system wczesnego ostrzegania dla powiadamiania o bezpośrednim lub pośrednim niebezpieczeństwie grożącym zdrowiu ludzkiemu, pochodzącym z żywności lub pokarmu. System obejmuje Państwa Członkowskie, Komisję i Urząd. Każde Państwo Członkowskie, Komisja i Urząd wyznaczą punkt kontaktowy, który będzie członkiem sieci. Komisja jest odpowiedzialna za zarządzanie sie…	Is "risk" translated using a synonim for "hazard" ("niebezpieczeństwie") in " direct or indirect risk"? Is the translation acceptable?
PL	risk	40	2. Where a member of the network has any information relating to the existence of a serious direct or indirect risk to human health deriving from food or feed, this information shall be immediately notified to the Commission under the rapid alert system. The Commission shall transmit this information immediately to the members of the network.	2. Jeżeli członek sieci posiada jakąkolwiek informację związaną z istnieniem bezpośredniego lub pośredniego niebezpieczeństwa grożącego zdrowiu ludzkiemu, pochodzącego z żywności lub pokarmu, to o takiej informacji natychmiast powiadamia Komisję w ramach systemu wczesnego ostrzegania. Komisja niezwłocznie przekazuje tę informację członkom sieci.	Is "risk" translated using a synonim for "hazard" ("niebezpieczeństwa")? Is the translation acceptable?
PL	risk	42	2. However, in emergencies, the Commission may provisionally adopt the measures referred to in paragraph 1 after consulting the Member State(s) concerned and informing the other Member States	2. Jednakże w sytuacjach zagrożenia, Komisja może tymczasowo przyjąć środki, określone w ust. 1, po konsultacji z danym Państwem lub Państwami Członkowskimi i poinformowaniu innych Państw Członkowskich.	Is "emergency situations" translated using the word for "hazard" ("zagrożenia")? Is the translation acceptable? Should it be translated as "sytuacje awaryjne" or in another way?

## Sheet: REG 852-2004
Old version
Language	Term	Location (doc page)	English	Translation	Observation	EU-FORA fellow reply
PL	hazard	4	(g) ‘potable water’ means water meeting the minimum requirements laid down in Council Directive 98/83/EC of 3 November 1998 on the quality of water intended for human consumption (1);	h) „czysta woda morska” oznacza naturalną, sztuczną lub oczyszczoną wodę morską lub słonawą, która nie zawiera drobnoustrojów, substancji szkodliwych lub toksycznego planktonu morskiego w ilościach zdolnych do bezpośredniego lub pośredniego zagrożenia zdrowotnej jakości żywności;	Is the word "hazard" missing from the Polish version? Is the translation correct?
PL	hazard	11	(g) to store and handle waste and hazardous substances so as to prevent contamination;	g) w celu składowania i przetwarzania odpadów i substancji niebezpiecznych w taki sposób, aby zapobiegać zanieczyszczeniu;	Is "hazardous" translated as "dangerous" ("niebezpiecznych") in "hazardous substances"?
PL	hazard	16	(f) adequate arrangements and/or facilities for the hygienic storage and disposal of hazardous and/or inedible substances and waste (whether liquid or solid) are to be available;	f) należy zapewnić odpowiednie warunki i/lub udogodnienia dla higienicznego składowania i usuwania niebezpiecznych i/lub niejadalnych substancji i odpadów (zarówno płynnych, jak i stałych);	Is "hazardous" translated as "dangerous" ("niebezpiecznych") in "hazardous and/or inedible substances"?
PL	hazard	17	5. Steam used directly in contact with food is not to contain any substance that presents a hazard to health or is likely to contaminate the food.	5. Para używana bezpośrednio w styczności z żywnością nie może zawierać jakichkolwiek substancji stwarzających ryzyko dla zdrowia lub mogących zanieczyścić żywność.	Is "hazard" translated as "risk" ("ryzyko") in "hazard to health"?
PL	hazard	18	8. Hazardous and/or inedible substances, including animal feed, are to be adequately labelled and stored in separate and secure containers.	8. Niebezpieczne i/lub niejadalne substancje, w tym pasza dla zwierząt, są odpowiednio oznaczone i magazynowane w oddzielnych i zabezpieczonych kontenerach	Is "hazardous" translated as "dangerous" ("Niebezpieczne") in "hazardous and/or inedible substances"?
Language	Term	Location (doc page)	English	Translation	Observation	EU-FORA fellow reply
PL	risk	-	-	-	-	-
New version
Language	Term	Location (doc page)	English	Translation	Observation	EU-FORA fellow reply
PL	hazard	3	(g) ‘potable water’ means water meeting the minimum requirements laid down in Council Directive 98/83/EC of 3 November 1998 on the quality of water intended for human consumption (1);	h) „czysta woda morska” oznacza naturalną, sztuczną lub oczyszczoną wodę morską lub słonawą, która nie zawiera drobnoustrojów, substancji szkodliwych lub toksycznego planktonu morskiego w ilościach zdolnych do bezpośredniego lub pośredniego zagrożenia zdrowotnej jakości żywności;	Is the word "hazard" missing in the Polish version? Is the translation correct?
PL	hazard	14	(g) to store and handle waste and hazardous substances so as to prevent contamination;	g) w celu składowania i przetwarzania odpadów i substancji niebezpiecznych w taki sposób, aby zapobiegać zanieczyszczeniu;	Is "hazardous" translated as "dangerous" ("niebezpiecznych") in "hazardous substances"?
PL	hazard	15	(f) to store and handle wastes and hazardous substances so as to prevent contamination;	f) w celu składowania i przetwarzania odpadów i substancji niebezpiecznych w taki sposób, aby zapobiegać zanieczyszczeniu;	Is "hazardous" translated as "dangerous" ("niebezpiecznych") in "hazardous substances"?
PL	hazard	19	(f) adequate arrangements and/or facilities for the hygienic storage and disposal of hazardous and/or inedible substances and waste (whether liquid or solid) are to be available;	f) należy zapewnić odpowiednie warunki i/lub udogodnienia dla higienicznego składowania i usuwania niebezpiecznych i/lub niejadalnych substancji i odpadów (zarówno płynnych, jak i stałych);	Is "hazardous" translated as "dangerous" ("niebezpiecznych") in "hazardous substances"?
PL	hazard	22	5. Steam used directly in contact with food is not to contain any substance that presents a hazard to health or is likely to contaminate the food.	5. Para używana bezpośrednio w styczności z żywnością nie może zawierać jakichkolwiek substancji stwarzających ryzyko dla zdrowia lub mogących zanieczyścić żywność.	Is "hazard" translated as "risk" ("ryzyko") in "hazard to health"?
PL	hazard	23	8. Hazardous and/or inedible substances, including animal feed, are to be adequately labelled and stored in separate and secure containers.	8. Niebezpieczne i/lub niejadalne substancje, w tym pasza dla zwierząt, są odpowiednio oznaczone i magazynowane w oddzielnych i zabezpieczonych kontenerach	Is "hazardous" translated as "dangerous" ("Niebezpieczne") in "hazardous and/or inedible substances"?
Language	Term	Location (doc page)	English	Translation	Observation	EU-FORA fellow reply
PL	risk	-	-	-	-	-

## Sheet: REG 853-2004
Old version
Language	Term	Location (doc page)	English	Translation	Observation	EU-FORA fellow reply
PL	hazard	8	(22) In order to ensure proper inspection of hunted wild game placed on the Community market, bodies of hunted animals and their viscera should be presented for official post-mortem inspection at a game-handling establishment. However, to preserve certain hunting traditions without prejudicing food safety, it is appropriate to provide for training for hunters who place wild game on the market for…	(22) W celu zapewnienia prawidłowej kontroli upolowanej zwierzyny łownej wprowadzanej do obrotu we Wspólnocie, korpusy i wnętrzności upolowanych zwierząt powinny być poddawane urzędowemu badaniu poubojowemu w zakładzie przetwórstwa dziczyzny. Niemniej jednak, aby zachować niektóre tradycje łowieckie bez uszczerbku dla bezpieczeństwa żywności, powinny zostać zapewnione szkolenia dla myśliwych, któ…	Is "risk" translated as "hazard" ("zagrożeń") in "anomalies or hazards" and "specific risks"?
PL	hazard	44	6. Where fish are headed and/or gutted on board, such operations must be carried out hygienically as soon as possible after capture, and the products must be washed immediately and thoroughly with potable water or clean water. In that event, the viscera and parts that may constitute a danger to public health must be removed as soon as possible and kept apart from products intended for human consu…	6. W przypadku odgławiania lub patroszenia ryb na pokładzie, operacje te należy wykonać w sposób higieniczny i możliwie jak najszybciej po odłowieniu, a produkty należy niezwłocznie dokładnie umyć pitną lub czystą wodą. W takim przypadku wnętrzności i części mogące stanowić zagrożenie dla zdrowia publicznego należy jak najszybciej usunąć i przetrzymywać z dala od produktów przeznaczonych do spoży…	Is "danger" translated as "hazard" ("zagrożeń")? Should it be a differentiation between danger and hazard?
Language	Term	Location (doc page)	English	Translation	Observation	EU-FORA fellow reply
PL	risk	29	(a) the animals cannot be transported, to avoid any risk for the handler or to protect the welfare of the animals;	a) zwierząt nie można transportować ze względu na zagrożenie dla obsługi lub ze względu na ochronę ich dobrostanu	Is "risk" translated as "hazard" ("zagrożenie") in "any risk"?
PL	risk	30	2. The trained person must carry out an examination of the body, and of any viscera removed, to identify any characteristics that may indicate that the meat presents a health risk. The examination must take place as soon as possible after killing.	2. Osoba przeszkolona musi dokonać oględzin uśmierconego zwierzęcia i usuniętych wnętrzności, w celu stwierdzenia ewentualnych cech, które mogą wskazywać, że mięso stanowi zagrożenie dla zdrowia. Oględzin należy dokonać możliwie jak najszybciej po uśmierceniu zwierzęcia.	Is "risk" translated as "hazard" ("zagrożenie") in "health risk"?
PL	risk	31	1. The trained person must carry out an examination to identify any characteristics that may indicate that the meat presents a health risk. The examination must take place as soon as possible after killing.	1. Osoba przeszkolona musi dokonać oględzin, w celu stwierdzenia ewentualnych cech, które mogą wskazywać, że mięso stanowi zagrożenie dla zdrowia. Oględzin należy dokonać możliwie jak najszybciej po uśmierceniu zwierzęcia.	Is "risk" translated as "hazard" ("zagrożenie") in "health risk"?
PL	risk	54	2. Eggs must be broken in a manner that minimises contamination, in particular by ensuring adequate separation from other operations. Cracked eggs must be processed as soon as possible.	2. Jaja rozbija się w sposób minimalizujący ryzyko zanieczyszczenia, zwłaszcza przez zapewnienie odpowiedniego oddzielenia tej czynności od innych operacji	Is the word "risk" ("ryzyko") used for expressing " minimises contamination" in the Polish version? Is the translationacceptable?
New version
Language	Term	Location (doc page)	English	Translation	Observation	EU-FORA fellow reply
PL	hazard	63	6. Where fish are headed and/or gutted on board, such operations must be carried out hygienically as soon as possible after capture, and the fishery products must be washed immediately. The viscera and parts that may constitute a danger to public health must be removed as soon as possible and kept apart from fishery products intended for human consumption. Livers and roes intended for human consu…	6. W przypadku odgławiania lub patroszenia ryb na pokładzie operacje te należy wykonać w sposób higieniczny i możliwie jak najszybciej po odłowieniu, a produkty rybołówstwa należy niezwłocznie umyć. Narządy wewnętrzne i części mogące stanowić zagrożenie dla zdrowia publicznego należy jak najszybciej usunąć i przetrzymywać z dala od produktów rybołówstwa przeznaczonych do spożycia przez ludzi. Wąt…	Is "danger" translated as "hazard" ("zagrożenie)? Should it be a differentiation between danger and hazard?
Language	Term	Location (doc page)	English	Translation	Observation	EU-FORA fellow reply
PL	risk	31	(a) the animals cannot be transported to the slaughterhouse, to avoid any risk for the handler and to prevent any injuries to the animals during transport;	a) zwierząt nie można przetransportować do rzeźni ze względu na zagrożenie dla obsługi i celem uniknięcia wszelkich obrażeń u zwierząt podczas transportu;	Is "risk" translated as "hazard" ("zagrożenie) in "avoid risk"?
PL	risk	40	(a) the animals cannot be transported, to avoid any risk for the handler or to protect the welfare of the animals;	a) zwierząt nie można transportować ze względu na zagrożenie dla obsługi lub ze względu na ochronę ich dobrostanu;	Is "risk" translated as "hazard" ("zagrożenie) in "any risk"?
PL	risk	42	2. The trained person must carry out an examination of the body, and of any viscera removed, to identify any characteristics that may indicate that the meat presents a health risk. The examination must take place as soon as possible after killing	2. Osoba przeszkolona musi dokonać oględzin uśmierconego zwierzęcia i usuniętych ►C1 narządów wewnętrznych ◄, w celu stwierdzenia ewentualnych cech, które mogą wskazywać, że mięso stanowi zagrożenie dla zdrowia. Oględzin należy dokonać możliwie jak najszybciej po uśmierceniu zwierzęcia.	Is "risk" translated as "hazard" ("zagrożenie) in "health risk"?
PL	risk	44	1. The trained person must carry out an examination to identify any characteristics that may indicate that the meat presents a health risk. The examination must take place as soon as possible after killing	1. Osoba przeszkolona musi dokonać oględzin, w celu stwierdzenia ewentualnych cech, które mogą wskazywać, że mięso stanowi zagrożenie dla zdrowia. Oględzin należy dokonać możliwie jak najszybciej po uśmierceniu zwierzęcia.	Is "risk" translated as "hazard" ("zagrożenie) in "health risk"?
PL	risk	65	treatment in order to kill viable parasites that may be a risk to the health of the consumer.	muszą dopilnować, aby surowiec lub produkt końcowy został poddany mrożeniu w celu zabicia żywotnych postaci pasożytów, które mogłyby stanowić zagrożenie dla zdrowia konsumentów.	Is "risk" translated as "hazard" ("zagrożenie) in "risk to health"?
PL	risk	77	2. Eggs must be broken in a manner that minimises contamination, in particular by ensuring adequate separation from other operations. Cracked eggs must be processed as soon as possible.	2. ►C1 Jaja wybija się w sposób minimalizujący ryzyko zanieczyszczenia, zwłaszcza przez zapewnienie odpowiedniego oddzielenia tej czynności od innych operacji. Jaja stłuczki powinny być przetworzone jak najszybciej. ◄	Is the word "risks" ("ryzyko") used for expressing "minimises contamination" in the Polish version? Is the translation acceptable?
PL	risk	80	(a) bones, other than specified risk materials as defined in Article 3(1)(g) of Regulation (EC) No 999/2001 of the European Parliament and of the Council (1);	a) kości, innych niż określone materiały niebezpieczne, zgodnie z definicją zawartą w art. 3 ust. 1 lit. g) rozporządzenia (WE) nr 999/2001 Parlamentu Europejskiego i Rady (1);	Is "risk" translated as "danger/dangerous" ("niebezpieczne")?
PL	risk	82	All precautions, including safe disposal of animal by-products, waste, unused or surplus material, shall be taken to avoid risks of spreading diseases to animals.	Należy podjąć wszelkie środki ostrożności, łącznie z bezpiecznym usuwaniem produktów ubocznych pochodzenia zwierzęcego, odpadów oraz materiału nieużytego lub jego nadmiaru, w celu zapobieżenia rozprzestrzenieniu się chorób na zwierzęta.	Is the word "risk" missing in the Polish version? Is the translation acceptable?
PL	risk	84	(a) bones, other than specified risk materials as defined in Article 3(1)(g) of Regulation (EC) No 999/2001;	a) kości, innych niż określone materiały niebezpieczne, zgodnie z definicją zawartą w art. 3 ust. 1 lit. g) rozporządzenia (WE) nr 999/2001;	Is the word "risks" ("ryzyko") used for expressing "minimises contamination" in the Polish version? Is the translation acceptable?
PL	risk	85	All precautions, including safe disposal of animal by-products, waste, unused or surplus material, shall be taken to avoid risks of spreading diseases to animals.	Należy podjąć wszelkie środki ostrożności, łącznie z bezpiecznym usuwaniem produktów ubocznych pochodzenia zwierzęcego, odpadów oraz materiału nieużytego lub jego nadmiaru, w celu zapobieżenia rozprzestrzenieniu się chorób na zwierzęta.	Is the word "risk" missing in the Polish version? Is the translation acceptable?
PL	risk	67	must ensure that the treatment of the raw materials used eliminates any animal or public health risk.	muszą zapewnić, by obróbka użytych surowców wyeliminowała wszelkie zagrożenia zdrowia zwierząt lub zdrowia publicznego.	Is "risk" translated as "hazard" ("zagrożenie) in "health risk"?

## Sheet: REG 625-2017
Old version
Language	Term	Location (doc page)	English	Translation	Observation	EU-FORA fellow reply
PL	hazard	2	(6) Transmissible animal diseases, including by micro-organisms that have developed resistance to antimicrobials, may have a significant impact on public health, food and feed safety, and animal health and welfare. In order to ensure high standards of animal and public health in the Union, rules on animal health measures and on feed and food safety are laid down at Union level. Compliance with th…	(6) Zakaźne choroby zwierząt, w tym wywoływane przez drobnoustroje, które rozwinęły oporność na środki przeciwdrobnoustrojowe, mogą mieć istotny wpływ na zdrowie publiczne, bezpieczeństwo żywności i paszy oraz zdrowie i dobrostan zwierząt. W celu zapewnienia wysokich standardów w zakresie zdrowia zwierząt i zdrowia publicznego w Unii przepisy dotyczące środków w zakresie zdrowia zwierząt oraz bez…	Is "threats" translated as "hazard" ("zagrożenia")? Should it be a differentiation between threat and hazard?
Language	Term	Location (doc page)	English	Translation	Observation	EU-FORA fellow reply
PL	risk	2	(3) Union legislation provides for a set of harmonised rules to ensure that food and feed are safe and wholesome, and that activities which might have an impact on the safety of the agri-food chain or on the protection of consumers’ interests in relation to food and food information are performed in accordance with specific requirements. Union rules exist also to ensure a high level of human, ani…	(3) W prawodawstwie Unii przewidziano zbiór zharmonizowanych przepisów w celu zapewnienia, by żywność i pasze były bezpieczne i zdrowe, a działania, które mogą mieć wpływ na bezpieczeństwo w łańcuchu rolno-spożywczym lub ochronę interesów konsumentów w związku z żywnością i informacjami dotyczącymi żywności, były prowadzone zgodnie z określonymi wymogami. Istnieją również przepisy Unii mające na …	Is the word hazard ("zagrożenie") used for expressing "fight against the possible spread of animal diseases, in some cases transmissible to humans, or of pests injurious to plants or plant products"? Is the translation acceptable?
PL	risk	3	The competent authorities should ensure that the staff responsible for official controls does not disclose information acquired during the performance of those controls where that information is covered by professional secrecy. Unless there is an overriding interest to justify disclosure, professional secrecy should include information which would undermine the purpose of inspections, investigati…	(31) Właściwe organy powinny zapewniać, by pracownicy odpowiedzialni za kontrole urzędowe nie ujawniali informacji uzyskanych w wyniku takich kontroli, jeżeli są one objęte tajemnicą służbową. O ile nie występuje nadrzędny interes uzasadniający ujawnienie, tajemnica służbowa powinna dotyczyć informacji, których udostępnienie mogłoby zaszkodzić realizacji celu kontroli urzędowej, postępowań wyjaśn…	Is "risk" translated as "hazard" ("zagrożenie") in "risk for health"?
PL	risk	15	The competent authorities should investigate cases where there is a suspicion of non-compliance with Union agri-food chain legislation and, where non-compliance is established, determine its origin and extent as well as the operators’ responsibilities. The competent authorities should also take appropriate measures to ensure that the operators concerned remedy the situation and to prevent further…	Właściwe organy powinny prowadzić postępowania wyjaśniające w sprawach, w których istnieje podejrzenie braku zgodności z prawodawstwem Unii dotyczącym łańcucha rolno-spożywczego oraz – w przypadku jego potwierdzenia – ustalić jego źródło i zakres, jak również obowiązki podmiotów. Ponadto właściwe organy powinny podejmować odpowiednie środki, aby zapewnić, by dane podmioty naprawiły zaistniałą syt…	Is the word "hazard" ("zagrożenia") used to express "potential risks and the likelihood of fraudulent"? Is the translation acceptable?
PL	risk	25	4. The competent authorities, when determining whether there is an overriding public interest in the disclosure of information covered by professional secrecy as referred to in paragraph 1, shall take into account inter alia the possible risks to human, animal or plant health, or to the environment, and the nature, severity and extent of such risks.	4. Określając, czy ujawnienie informacji objętych tajemnicą służbową, o których mowa w ust. 1, jest uzasadnione nadrzędnym interesem publicznym, właściwe organy biorą pod uwagę między innymi potencjalne zagrożenia dla zdrowia ludzi, zwierząt lub roślin, lub dla środowiska, oraz charakter, nasilenie i zakres zagrożenia	Is "risks" translated as "hazards" ("zagrożenia") in "possible hazards"?
PL	risk	27	3. The Commission shall adopt delegated acts in accordance with Article 144 to amend this Regulation concerning the setting out of categories of operators to be exempted from the list of operators referred to in paragraph 2 of this Article where their inclusion in such a list would constitute a disproportionate administrative burden for them compared to the risk related to their activities	3. Komisja przyjmuje zgodnie z art. 144, w celu zmiany niniejszego rozporządzenia, akty delegowane dotyczące określenia kategorii podmiotów zwolnionych z umieszczenia w wykazie, o którym mowa w ust. 2 niniejszego artykułu, jeżeli umieszczenie w nim stanowiłoby dla nich nieproporcjonalne obciążenie administracyjne w stosunku do niskiego zagrożenia związanego z ich działalnością.	Is "risks" translated as "hazards" ("zagrożenia") in "possible hazards"?
PL	risk	37	(b) uniform frequency of official controls performed by competent authorities on operators authorised to issue plant passports in accordance with Article 84(1) of Regulation (EU) 2016/2031 having regard to whether those operators have implemented a pest risk management plan as referred to in Article 91 of that Regulation for the plants, plant products and other objects they produce;	b) jednolitej częstotliwości kontroli urzędowych przeprowadzanych przez właściwe organy w odniesieniu do podmiotów upoważnionych do wydawania paszportów roślin zgodnie z art. 84 ust. 1 rozporządzenia (UE) 2016/2031, uwzględniając kwestię, czy dane podmioty wdrożyły plan zarządzania zagrożeniem agrofagami przewidziany w art. 91 tego rozporządzenia w odniesieniu do produkowanych przez nie roślin, p…	Is "risks" translated as "hazards" ("zagrożenia") in "possible hazards"?
PL	risk	39	(c) information on poisoning related to plant protection products, including information available in accordance to Article 56 of Regulation (EC) No 1107/2009, and information on emergency health responses made available by the centres referred to in Article 45(1) of Regulation (EC) No 1272/2008 of the European Parliament and of the Council (2).	c) informacje o zatruciach związanych ze środkami ochrony roślin, w tym informacje dostępne zgodnie z art. 56 rozporządzenia (WE) nr 1107/2009 oraz informacje o reagowaniu na nagłe przypadki zagrożenia zdrowia udostępnione przez jednostki, o których mowa w art. 45 ust. 1 rozporządzenia Parlamentu Europejskiego i Rady (WE) nr 1272/2008 ( 2 ).	Is "emergency" translated as "hazard" ("zagrożenia")? Is the translation acceptable?
PL	risk	111	‘Authorised operators implementing an approved pest risk management plan may be subject to inspections with a reduced frequency, as referred to in point (b) of Article 22(3) of Regulation (EU) 2017/….’;	„Podmioty upoważnione wdrażające zatwierdzony plan zarządzania zagrożeniem agrofagami mogą podlegać kontrolom o zmniejszonej częstotliwości, o których mowa w art. 22 ust. 3 lit. b) rozporządzenia (UE) 2017/….”;	Is "risk" translated as "hazard" ("zagrożeniem") in "risk management"?
PL	risk	115	Contingency arrangements for emergencies, including communication between Member States and the Commission	Rozwiązania awaryjne na wypadek zagrożenia, w tym komunikacja między państwami członkowskimi a Komisją	Is "emergencies" translated as "hazards" ("zagrożenia")? Is the translation acceptable?
New version
Language	Term	Location (doc page)	English	Translation	Observation	EU-FORA fellow reply
PL	hazard	32	(2) Regulation (EU) No 649/2012 of the European Parliament and of the Council of 4 July 2012 concerning the export and import of hazardous chemicals (OJ L 201, 27.7.2012, p. 60).	(2) Rozporządzenie Parlamentu Europejskiego i Rady (UE) nr 649/2012 z dnia 4 lipca 2012 r. dotyczące wywozu i przywozu niebezpiecznych chemikaliów (Dz.U. L 201 z 27.7.2012, s. 60).	Is "hazardous" translated as "dangerous" ("niebezpiecznych") in "hazardous chemicals"?
Language	Term	Location (doc page)	English	Translation	Observation	EU-FORA fellow reply
PL	risk	13	4. The competent authorities, when determining whether there is an overriding public interest in the disclosure of information covered by professional secrecy as referred to in paragraph 1, shall take into account inter alia the possible risks to human, animal or plant health, or to the environment, and the nature, severity and extent of such risks.	4. Określając, czy ujawnienie informacji objętych tajemnicą służbową, o których mowa w ust. 1, jest uzasadnione nadrzędnym interesem publicznym, właściwe organy biorą pod uwagę między innymi potencjalne zagrożenia dla zdrowia ludzi, zwierząt lub roślin, lub dla środowiska, oraz charakter, nasilenie i zakres zagrożenia	Is "risks" translated as "hazards" ("zagrożenia") in "risks to human" and "such risks"?
PL	risk	15	3. The Commission shall adopt delegated acts in accordance with Article 144 to amend this Regulation concerning the setting out of categories of operators to be exempted from the list of operators referred to in paragraph 2 of this Article where their inclusion in such a list would constitute a disproportionate administrative burden for them compared to the risk related to their activities	3. Komisja przyjmuje zgodnie z art. 144, w celu zmiany niniejszego rozporządzenia, akty delegowane dotyczące określenia kategorii podmiotów zwolnionych z umieszczenia w wykazie, o którym mowa w ust. 2 niniejszego artykułu, jeżeli umieszczenie w nim stanowiłoby dla nich nieproporcjonalne obciążenie administracyjne w stosunku do niskiego zagrożenia związanego z ich działalnością.	Is "risks" translated as "hazards" ("zagrożenia") in "risk related"?
PL	risk	29	(b) uniform frequency of official controls performed by competent authorities on operators authorised to issue plant passports in accordance with Article 84(1) of Regulation (EU) 2016/2031 having regard to whether those operators have implemented a pest risk management plan as referred to in Article 91 of that Regulation for the plants, plant products and other objects they produce;	b) jednolitej częstotliwości kontroli urzędowych przeprowadzanych przez właściwe organy w odniesieniu do podmiotów upoważnionych do wydawania paszportów roślin zgodnie z art. 84 ust. 1 rozporządzenia (UE) 2016/2031, uwzględniając kwestię, czy dane podmioty wdrożyły plan zarządzania zagrożeniem agrofagami przewidziany w art. 91 tego rozporządzenia w odniesieniu do produkowanych przez nie roślin, p…	Is "risks" translated as "hazards" ("zagrożenia") in "risk management"?
PL	risk	31	(c) information on poisoning related to plant protection products, including information available in accordance to Article 56 of Regulation (EC) No 1107/2009, and information on emergency health responses made available by the centres referred to in Article 45(1) of Regulation (EC) No 1272/2008 of the European Parliament and of the Council (2).	c) informacje o zatruciach związanych ze środkami ochrony roślin, w tym informacje dostępne zgodnie z art. 56 rozporządzenia (WE) nr 1107/2009 oraz informacje o reagowaniu na nagłe przypadki zagrożenia zdrowia udostępnione przez jednostki, o których mowa w art. 45 ust. 1 rozporządzenia Parlamentu Europejskiego i Rady (WE) nr 1272/2008 ( 2 ).	Is the word "hazards" ("zagrożenia") used for expressing "emergency health responses"? Is the translation acceptable?
PL	risk	132	‘Authorised operators implementing an approved pest risk management plan may be subject to inspections with a reduced frequency, as referred to in point (b) of Article 22(3) of Regulation ►C1 (EU) 2017/625 ◄.’;	„Podmioty upoważnione wdrażające zatwierdzony plan zarządzania zagrożeniem agrofagami mogą podlegać kontrolom o zmniejszonej częstotliwości, o których mowa w art. 22 ust. 3 lit. b) rozporządzenia ►C1 (UE) 2017/625 ◄.”;	Is "risk" translated as "hazard" ("zagrożeniem") in "risk management"?
PL	risk	136	Contingency arrangements for emergencies, including communication between Member States and the Commission	Rozwiązania awaryjne na wypadek zagrożenia, w tym komunikacja między państwami członkowskimi a Komisją	Is the word "hazards" ("zagrożenia") used for expressing "for emergencies"? Is thhere an addition to the Polish version? Is the translation acceptable?

## Sheet: REG 1381-2019
Single version
Language	Term	Location (doc page)	English	Translation	Observation	EU-FORA fellow reply
PL	hazard	-	-	-	-	-
Language	Term	Location (doc page)	English	Translation	Observation	EU-FORA fellow reply
PL	risk	-	-	-	-	-
