# Supplementary material for: Food Risk Analysis: Towards a Better Understanding of „Hazard” and „Risk” in EU food legislation
Source: Preprints.org preprint supplement (doi:10.20944/preprints202306.1556.v1), 2023-06-21
Supplement: Supplementary file 23 [file PT.xlsx]

## Sheet: REG 178-2002
Old version
Language	Term	Location (doc page)	English	Translation	Observation	EU-FORA fellow reply
PT	hazard	15	the Panel on biological hazards;	Painel dos riscos biológicos;	Is "hazards" translated as "risks" ("riscos") in "biological hazards"?
Language	Term	Location (doc page)	English	Translation	Observation	EU-FORA fellow reply
PT	risk	-	-	-	-	-
New version
Language	Term	Location (doc page)	English	Translation	Observation	EU-FORA fellow reply
PT	hazard	20	the Panel on biological hazards;	Painel dos riscos biológicos;	Is " hazards" translated as "risks" ("riscos biológicos") in "biological hazards"?
Language	Term	Location (doc page)	English	Translation	Observation	EU-FORA fellow reply
PT	risk	-	-	-	-	-

## Sheet: REG 852-2004
Old version
Language	Term	Location (doc page)	English	Translation	Observation	EU-FORA fellow reply
PT	hazard	4	(10) Food hazards present at the level of primary production should be identified and adequately controlled to ensure the achievement of the objectives of this Regulation. However, in the case of the direct supply of small quantities of primary products, by the food business operator producing them, to the final consumer or to a local retail establishment, it is appropriate to protect public heal…	(10) Os riscos alimentares presentes a nível da produção primária devem ser identificados e controlados adequadamente, a fim de assegurar a consecução dos objectivos do presente regulamento. Todavia, em caso de fornecimento directo de pequenas quantidades de produtos da produção primária pelo operador da empresa do sector alimentar que os produz ao consumidor final ou a um estabelecimento local d…	Is "hazards" translated as "risks" ("riscos") in "food hazards"?
PT	hazard	10	(a) ‘food hygiene’, hereinafter called ‘hygiene’, means the measures and conditions necessary to control hazards and to ensure fitness for human consumption of a foodstuff taking into account its intended use;	a) «Higiene dos géneros alimentícios», a seguir designada por «higiene», as medidas e condições necessárias para controlar os riscos e assegurar que os géneros alimentícios sejam próprios para consumo humano tendo em conta a sua utilização;	Is "hazards" translated as "risks" ("riscos") in "control hazards" in " control hazards"?
PT	hazard	11	(f) ‘contamination’ means the presence or introduction of a hazard;	f) «Contaminação», a presença ou introdução de um risco;	Is "hazard" translated as "risk" ("risco") in "introduction of a hazard" in "introduction of a hazard"?
PT	hazard	15	(b) identifying the critical control points at the step or steps at which control is essential to prevent or eliminate a hazard or to reduce it to acceptable levels;	b) Identificação dos pontos críticos de controlo na fase ou fases em que o controlo é essencial para evitar ou eliminar um risco ou para o reduzir para níveis aceitáveis;	Is "hazard" translated as "risk" ("risco") in "eliminate a hazard"?
PT	hazard	16	(c) establishing critical limits at critical control points which separate acceptability from unacceptability for the prevention, elimination or reduction of identified hazards;	c) Estabelecimento de limites críticos em pontos críticos de controlo, que separem a aceitabilidade da não aceitabilidade com vista à prevenção, eliminação ou redução dos riscos identificados;	Is "hazards" translated as "risks" ("riscos") in " identified hazards"?
PT	hazard	32	3. Notwithstanding the general duty laid down in paragraph 2, food business operators are to comply with appropriate Community and national legislative provisions relating to the control of hazards in primary production and associated operations, including:	3. Não obstante a obrigação geral prevista no ponto anterior, os operadores das empresas do sector alimentar devem respeitar as disposições legislativas, comunitárias e nacionais, aplicáveis ao controlo dos riscos na produção primária e operações conexas, incluindo:	Is "hazards" translated as "risks" ("riscos") in "control of hazards"?
PT	hazard	35	7. Food business operators are to keep and retain records relating to measures put in place to control hazards in an appropriate manner and for an appropriate period, commensurate with the nature and size of the food business. Food business operators are to make relevant information contained in these records available to the competent authority and receiving food business operators on request.	7. Os operadores das empresas do sector alimentar devem manter e conservar registos das medidas tomadas para controlar os riscos de forma adequada e durante um período apropriado, compatível com a natureza e dimensão da empresa do sector alimentar. Os operadores das empresas do sector alimentar devem disponibilizar quaisquer informações relevantes contidas nesses registos à autoridade competente …	Is "hazards" translated as "risks" ("riscos") in "control hazards"?
PT	hazard	37	1. National and Community guides referred to in Articles 7 to 9 of this Regulation should contain guidance on good hygiene practice for the control of hazards in primary production and associated operations.	1. Os códigos nacionais e comunitários a que se referem os artigos 7.o a 9.o do presente regulamento deverão conter orientações sobre as boas práticas de higiene para o controlo dos riscos na produção primária e operações conexas.	Is "hazards" translated as "risks" ("riscos") in "control of hazards"?
PT	hazard	37	2. Guides to good hygiene practice should include appropriate information on hazards that may arise in primary production and associated operations and actions to control hazards, including relevant measures set out in Community and national legislation or national and Community programmes. Examples of such hazards and measures may include:	2. Os códigos de boas práticas de higiene deverão conter informações adequadas sobre os riscos que possam resultar da produção primária e operações conexas e sobre as acções para controlar os referidos riscos, incluindo as medidas relevantes estabelecidas na legislação nacional e comunitária ou nos programas nacionais e comunitários. Entre esses riscos e medidas podem incluir-se:	Is "hazards" translated as "risks" ("riscos") in "control hazards" and "such hazards"?
PT	hazard	49	5. Steam used directly in contact with food is not to contain any substance that presents a hazard to health or is likely to contaminate the food.	5. O vapor utilizado em contacto directo com os alimentos não deve conter substâncias que representem um risco para a saúde ou que possam contaminar os alimentos.	Is "hazard" translated as "risk" ("risco") in "hazard to health"?
Language	Term	Location (doc page)	English	Translation	Observation	EU-FORA fellow reply
PT	risk	-	-	-	-	-
New version
Language	Term	Location (doc page)	English	Translation	Observation	EU-FORA fellow reply
PT	hazard	3	(a) ‘food hygiene’, hereinafter called ‘hygiene’, means the measures and conditions necessary to control hazards and to ensure fitness for human consumption of a foodstuff taking into account its intended use;	a) «Higiene dos géneros alimentícios», a seguir designada por «higiene», as medidas e condições necessárias para controlar os riscos e assegurar que os géneros alimentícios sejam próprios para consumo humano tendo em conta a sua utilização;	Is "hazards" translated as "risks" ("riscos") in "control hazards"?
PT	hazard	3	(f) ‘contamination’ means the presence or introduction of a hazard;	f) «Contaminação», a presença ou introdução de um risco;	Is "hazard" translated as "risk" ("risco") in "introduction of a hazard"?
PT	hazard	5	(b) identifying the critical control points at the step or steps at which control is essential to prevent or eliminate a hazard or to reduce it to acceptable levels;	b) Identificação dos pontos críticos de controlo na fase ou fases em que o controlo é essencial para evitar ou eliminar um risco ou para o reduzir para níveis aceitáveis;	Is "hazard" translated as "risk" ("risco") in "identified hazards"?
PT	hazard	5	(c) establishing critical limits at critical control points which separate acceptability from unacceptability for the prevention, elimination or reduction of identified hazards;	c) Estabelecimento de limites críticos em pontos críticos de controlo, que separem a aceitabilidade da não aceitabilidade com vista à prevenção, eliminação ou redução dos riscos identificados;	Is "hazard" translated as "risk" ("risco") in "identified hazards"?
PT	hazard	14	3. Notwithstanding the general duty laid down in paragraph 2, food business operators are to comply with appropriate Community and national legislative provisions relating to the control of hazards in primary production and associated operations, including:	3. Não obstante a obrigação geral prevista no ponto anterior, os operadores das empresas do sector alimentar devem respeitar as disposições legislativas, comunitárias e nacionais, aplicáveis ao controlo dos riscos na produção primária e operações conexas, incluindo:	Is "hazards" translated as "risks" ("riscos") in "control of hazards"?
PT	hazard	15	7. Food business operators are to keep and retain records relating to measures put in place to control hazards in an appropriate manner and for an appropriate period, commensurate with the nature and size of the food business. Food business operators are to make relevant information contained in these records available to the competent authority and receiving food business operators on request.	7. Os operadores das empresas do sector alimentar devem manter e conservar registos das medidas tomadas para controlar os riscos de forma adequada e durante um período apropriado, compatível com a natureza e dimensão da empresa do sector alimentar. Os operadores das empresas do sector alimentar devem disponibilizar quaisquer informações relevantes contidas nesses registos à autoridade competente …	Is "hazards" translated as "risks" ("riscos") in "control hazards"?
PT	hazard	16	1. National and Community guides referred to in Articles 7 to 9 of this Regulation should contain guidance on good hygiene practice for the control of hazards in primary production and associated operations.	1. Os códigos nacionais e comunitários a que se referem os artigos 7.o a 9.o do presente regulamento deverão conter orientações sobre as boas práticas de higiene para o controlo dos riscos na produção primária e operações conexas.	Is "hazards" translated as "risks" ("riscos") in "control of hazards"?
PT	hazard	16	2. Guides to good hygiene practice should include appropriate information on hazards that may arise in primary production and associated operations and actions to control hazards, including relevant measures set out in Community and national legislation or national and Community programmes. Examples of such hazards and measures may include:	2. Os códigos de boas práticas de higiene deverão conter informações adequadas sobre os riscos que possam resultar da produção primária e operações conexas e sobre as acções para controlar os referidos riscos, incluindo as medidas relevantes estabelecidas na legislação nacional e comunitária ou nos programas nacionais e comunitários. Entre esses riscos e medidas podem incluir-se:	Is "hazards" translated as "risks" ("riscos") in "control hazards"?
PT	hazard	22	5. Steam used directly in contact with food is not to contain any substance that presents a hazard to health or is likely to contaminate the food.	5. O vapor utilizado em contacto directo com os alimentos não deve conter substâncias que representem um risco para a saúde ou que possam contaminar os alimentos.	Is "hazard" translated as "risk" ("risco") in "hazard to health"?
Language	Term	Location (doc page)	English	Translation	Observation	EU-FORA fellow reply
PT	risk	-	-	-	-	-

## Sheet: REG 853-2004
Old version
Language	Term	Location (doc page)	English	Translation	Observation	EU-FORA fellow reply
PT	hazard	2	(2) Certain foodstuffs may present specific hazards to human health, requiring the setting of specific hygiene rules. This is particularly the case for food of animal origin, in which microbiological and chemical hazards have frequently been reported	(2) Certos géneros alimentícios podem apresentar riscos específicos para a saúde humana que tornem necessário o estabelecimento de regras específicas de higiene. É esse nomeadamente o caso dos géneros alimentícios de origem animal, nos quais se têm frequentemente constatado riscos microbiológicos e químicos	Is "hazard" translated as "risks" ("riscos") in "microbiological and chemical hazards"?
PT	hazard	8	(22) In order to ensure proper inspection of hunted wild game placed on the Community market, bodies of hunted animals and their viscera should be presented for official post-mortem inspection at a game-handling establishment. However, to preserve certain hunting traditions without prejudicing food safety, it is appropriate to provide for training for hunters who place wild game on the market for…	(22) A fim de assegurar uma inspecção adequada da caça selvagem colocada no mercado da Comunidade, os cadáveres de animais caçados e as suas vísceras devem ser apresentados para inspecção oficial post mortem num estabelecimento de manipulação de caça. Contudo, para preservar certas tradições cinegéticas sem prejudicar a segurança dos alimentos, convém prever a formação dos caçadores que colocam c…	Is "hazards" translated as "risks" ("riscos") in "anomalies or hazards" and "specific risks"?
PT	hazard	26	(c) explain the reasons for the adaptation, including, where relevant, by providing a summary of the hazard analysis carried out and any measures to be taken to ensure that the adaptation will not compromise the objectives of this Regulation; and	c) A explicação das razões da adaptação, incluindo, se pertinente, um resumo da análise de riscos efectuada e quaisquer medidas a tomar para garantir que a adaptação não comprometa os objectivos do presente regulamento;	Is "hazard" translated as "risks" ("riscos") in "hazard analysis"?
PT	hazard	28	8) to specify criteria for determining when epidemiological data indicate that a fishing ground does not present a health hazard with regard to the presence of parasites and, consequently, for determining when the competent authority may authorise food business operators not to freeze fishery products in accordance with Annex III, Section VIII, Chapter III, Part D;	8) Especificar critérios para determinar quando os dados epidemiológicos indicam que um pesqueiro não representa um risco sanitário quanto à presença de parasitas e, por conseguinte, quando a autoridade competente poderá autorizar os operadores das empresas do sector alimentar a não congelar produtos da pesca nos termos da Parte D do Capítulo III da Secção VIII do Anexo III;	Is "hazard" translated as "risks" ("riscos") in "health hazard"?
PT	hazard	43	1. Food business operators operating slaughterhouses must ensure that the procedures that they have put in place in accordance with the general requirements of Article 5 of Regulation (EC) No …/2004 ∗ meet the requirements that the hazard analysis shows to be necessary and the specific requirements listed in paragraph 2.	1. Os operadores das empresas do sector alimentar responsáveis por matadouros devem assegurar que os procedimentos que adoptaram de acordo com os requisitos gerais do artigo 5.º do Regulamento (CE) n.º .../2004 * obedecem aos requisitos que se revelem necessários com base na análise de risco e aos requisitos específicos enumerados no ponto 2.	Is "hazard" translated as "risk" ("risco") in "hazard analysis"?
PT	hazard	114	(a) epidemiological data are available indicating that the fishing grounds of origin do not present a health hazard with regard to the presence of parasites; and	a) i dati epidemiologici disponibili indichino che le zone di pesca d'origine non presentano rischi sanitari con riguardo alla presenza di parassiti;	Is "hazard" translated as "risk" ("risco") in "health hazard"?
PT	hazard	134	5. After breaking, each particle of the egg product must undergo processing as quickly as possible to eliminate microbiological hazards or to reduce them to an acceptable level. A batch that has been insufficiently processed may immediately undergo processing again in the same establishment, if this processing renders it fit for human consumption. When a batch is found to be unfit for human consu…	5. Depois de partidos os ovos, todas as partículas do ovoproduto devem ser submetidas, tão rapidamente quanto possível, a uma transformação destinada a eliminar riscos microbiológicos ou a reduzi-los para um nível aceitável. Os lotes cuja transformação tenha sido insuficiente devem ser submetidos imediatamente a uma nova transformação no mesmo estabelecimento, na condição de o novo tratamento os …	Is "hazards" translated as "risks" ("riscos") in "microbiological hazards"?
PT	hazard	136	4. Frogs and snails must be subjected to an organoleptic examination carried out by sampling. If that examination indicates that they might present a hazard, they must not be used for human consumption.	4. As rãs e os caracóis devem ser sujeitos a um exame organoléptico efectuado por amostragem. Se esse exame indicar que podem apresentar um risco, não devem ser utilizados para consumo humano.	Is "hazard" translated as "risk" ("risco") in "present a hazard"?
PT	hazard	137	6. After killing, snails' hepato-pancreas must, if it might present a hazard, be removed and not be used for human consumption.	6. Após o abate, os hepato-pâncreas dos caracóis devem, se puderem representar um risco, ser removidos e não devem ser utilizados para consumo humano	Is "hazard" translated as "risk" ("risco") in "present a hazard"?
Language	Term	Location (doc page)	English	Translation	Observation	EU-FORA fellow reply
PT	hazard	134	2. Eggs must be broken in a manner that minimises contamination, in particular by ensuring adequate separation from other operations. Cracked eggs must be processed as soon as possible.	2. Os ovos devem ser partidos de um modo que reduza ao mínimo os riscos de contaminação, devendo-se, em especial, assegurar uma separação adequada das restantes operações. Os ovos fendidos devem ser transformados logo que possível.	Is the word "risks" ("riscos") used for expressing "minimises contamination" in the Portuguese version? Is the translation acceptable?
New version
Language	Term	Location (doc page)	English	Translation	Observation	EU-FORA fellow reply
PT	hazard	11	(i) the criteria for determining when epidemiological data indicate that a fishing ground does not present a health hazard with regard to the presence of parasites and, consequently, for determining when the competent authority may authorise food business operators not to freeze fishery products in accordance with Annex III, Section VIII, Chapter III, Part D;	i) À especificação de critérios para determinar quando os dados epidemiológicos indicam que um pesqueiro não representa um risco sanitário quanto à presença de parasitas e, por conseguinte, quando a autoridade competente poderá autorizar os operadores das empresas do setor alimentar a não congelar produtos da pesca nos termos do anexo III, secção VIII, capítulo III, parte D;	Is "hazard" translated as "risk" ("risco") in "health hazard"?
PT	hazard	12	(c) explain the reasons for the adaptation, including, where relevant, by providing a summary of the hazard analysis carried out and any measures to be taken to ensure that the adaptation will not compromise the objectives of this Regulation;	c) A explicação das razões da adaptação, incluindo, se pertinente, um resumo da análise de riscos efectuada e quaisquer medidas a tomar para garantir que a adaptação não comprometa os objectivos do presente regulamento;	Is "hazard" translated as "risk" ("risco") in "hazard analysis"?
PT	hazard	21	1. Food business operators operating slaughterhouses must ensure that the procedures that they have put in place in accordance with the general requirements of Article 5 of Regulation (EC) No 852/2004 meet the requirements that the hazard analysis shows to be necessary and the specific requirements listed in point 2.	1. Os operadores das empresas do sector alimentar responsáveis por matadouros devem assegurar que os procedimentos que adoptaram de acordo com os requisitos gerais do artigo 5.o do Regulamento (CE) n.o 852/2004 obedecem aos requisitos que se revelem necessários com base na análise de risco e aos requisitos específicos enumerados no ponto 2.	Is "hazard" translated as "risk" ("risco") in "hazard analysis"?
PT	hazard	23	7. If the competent authority so permits and provided it does not jeopardise the objectives of this Regulation, food chain information may arrive less than 24 hours before the arrival of the animals of all species to which it relates at the slaughterhouse or accompany these animals to the slaughterhouse.	7. Se a autoridade competente o permitir e desde que não sejam postos em risco os objectivos do presente regulamento, as informações sobre a cadeia alimentar podem chegar ao matadouro num prazo inferior a 24 horas antes da chegada dos animais de todas as espécies a que se referem ou acompanhar os animais aquando da sua chegada ao matadouro.	Is the word "risk" ("risc") used for expressing ("jeoperdise") in the Portuguese version? Is the translation acceptable?
PT	hazard	63	6. Where fish are headed and/or gutted on board, such operations must be carried out hygienically as soon as possible after capture, and the fishery products must be washed immediately. The viscera and parts that may constitute a danger to public health must be removed as soon as possible and kept apart from fishery products intended for human consumption. Livers and roes intended for human consu…	6. Quando os peixes forem descabeçados e/ou eviscerados a bordo, essas operações têm de ser efetuadas de modo higiénico, assim que possível após a captura, e os produtos da pesca têm de ser imediatamente lavados. As vísceras e as partes que possam representar um perigo para a saúde pública têm de ser separadas assim que possível e afastadas dos produtos da pesca destinados ao consumo humano. Os f…	Is "danger" translated using the word for "hazard" ("perigo")? Should there be a differentiation between danger and hazard?
PT	hazard	53	(i) there are epidemiological data available indicating that the fishing grounds of origin do not present a health hazard with regard to the presence of parasites; and	i) Existam dados epidemiológicos disponíveis que indiquem que os pesqueiros de origem não apresentam um risco sanitário no que diz respeito à presença de parasitas; e	Is "hazard" translated as "risk" ("risco") in "health hazard"?
PT	hazard	53	(d) derived from fish farming, cultured from embryos and have been fed exclusively on a diet that cannot contain viable parasites that present a health hazard, and one of the following requirements is complied with:	d) Derivados da aquicultura, cultivados desde embriões e alimentados exclusivamente com alimentos que não possam conter parasitas viáveis que apresentem um risco sanitário, e que cumpram um dos seguintes requisitos:	Is "hazard" translated as "risk" ("risco") in "health hazard"?
PT	hazard	53	(ii) the food business operator verifies through procedures, approved by the competent authority, that the fishery products do not represent a health hazard with regard to the presence of viable parasites.	ii) O operador do sector alimentar verifica através dos procedimentos aprovados pela autoridade competente que os produtos da pesca não representam um risco sanitário no que respeita à presença de parasitas viáveis	Is "hazard" translated as "risk" ("risco") in "health hazard"?
PT	hazard	53	(b) Before placing on the market fishery products referred to in points 3(c) and (d) which have not undergone the freezing treatment or which are not intended to undergo before consumption a treatment that kills viable parasites that present a health hazard, a food business operator must ensure that the fishery products originate from a fishing ground or fish farming which complies with the speci…	b) Antes de colocar no mercado os produtos da pesca referidos no ponto 3, alíneas c) e d), que não foram submetidos ao tratamento por congelação ou que não se destinem a ser submetidos, antes de serem consumidos, a um tratamento que elimine os parasitas viáveis que apresentam um risco sanitário, um operador do sector alimentar tem de assegurar que os produtos da pesca são originários de um pesque…	Is "hazard" translated as "risk" ("risco") in "health hazard"?
PT	hazard	77	5. After breaking, each particle of the liquid egg must undergo processing as quickly as possible to eliminate microbiological hazards or to reduce them to an acceptable level. A batch that has been insufficiently processed may immediately undergo processing again in the same establishment if this processing renders it fit for human consumption. Where a batch is found to be unfit for human consum…	5. Depois de partidos os ovos, todas as partículas do ovo líquido devem ser submetidas, tão rapidamente quanto possível, a uma transformação destinada a eliminar riscos microbiológicos ou a reduzi-los para um nível aceitável. Os lotes cuja transformação tenha sido insuficiente devem ser submetidos imediatamente a uma nova transformação no mesmo estabelecimento, na condição de o novo tratamento os…	Is "hazards" translated as "risks" ("riscos") in "microbiological hazards"?
PT	hazard	78	4. Frogs and snails must be subjected to an organoleptic examination carried out by sampling. If that examination indicates that they might present a hazard, they must not be used for human consumption.	4. As rãs e os caracóis devem ser sujeitos a um exame organoléptico efectuado por amostragem. Se esse exame indicar que podem apresentar um risco, não devem ser utilizados para consumo humano.	Is "hazard" translated as "risk" ("risco") in "present a hazard"?
PT	hazard	78	6. After killing, snails' hepato-pancreas must, if it might present a hazard, be removed and not be used for human consumption.	6. Após o abate, os hepato-pâncreas dos caracóis devem, se puderem representar um risco, ser removidos e não devem ser utilizados para consumo humano.	Is "hazard" translated as "risk" ("risco") in "present a hazard"?
Language	Term	Location (doc page)	English	Translation	Observation	EU-FORA fellow reply
PT	hazard	77	2. Eggs must be broken in a manner that minimises contamination, in particular by ensuring adequate separation from other operations. Cracked eggs must be processed as soon as possible	2. Os ovos devem ser partidos de um modo que reduza ao mínimo os riscos de contaminação, devendo-se, em especial, assegurar uma separação adequada das restantes operações. Os ovos fendidos devem ser transformados logo que possível.	Is the word "risks" ("rischi") used for expressing "minimises contamination" in the Potuguese version? Is the translation acceptable?

## Sheet: REG 625-2017
Old version
Language	Term	Location (doc page)	English	Translation	Observation	EU-FORA fellow reply
PT	hazard	-	-	-	-	-
Language	Term	Location (doc page)	English	Translation	Observation	EU-FORA fellow reply
PT	risk	-	-	-	-	-
New version
Language	Term	Location (doc page)	English	Translation	Observation	EU-FORA fellow reply
PT	hazard	-	-	-	-	-
Language	Term	Location (doc page)	English	Translation	Observation	EU-FORA fellow reply
PT	risk	-	-	-	-	-

## Sheet: REG 1381-2019
Single version
Language	Term	Location (doc page)	English	Translation	Observation	EU-FORA fellow reply
PT	hazard	-	-	-	-	-
Language	Term	Location (doc page)	English	Translation	Observation	EU-FORA fellow reply
PT	risk	-	-	-	-	-
