# Supplementary material for: Food Risk Analysis: Towards a Better Understanding of „Hazard” and „Risk” in EU food legislation
Source: Preprints.org preprint supplement (doi:10.20944/preprints202306.1556.v1), 2023-06-21
Supplement: Supplementary file 24 [file RO.xlsx]

## Sheet: REG 178-2002
Old version
Language	Term	Location (doc page)	English	Translation	Observation	EU-FORA fellow reply
RO	hazard	3	(10) Experience has shown that the functioning of the internal market in food or feed can be jeopardised where it is impossible to trace food and feed. It is therefore necessary to establish a comprehensive system of traceability within food and feed businesses so that targeted and accurate withdrawals can be undertaken or information given to consumers or control officials, thereby avoiding the …	(10) Experiența a demonstrat că funcționarea pieței interne de produse alimentare ș i hrană pentru animale poate fi pusă în pericol în cazul în care este imposibil să se asigure trasabilitatea produselor alimentare ș i a hranei pentru animale. De aceea, este necesar să se stabilească un sistem cuprinzător de trasabilitate în afacerile cu produse alimentare ș i hrană pentru animale, astfel încât s…	Is "jeoperdised" translated with the word for "hazard" with the meaning of "put in danger" ("pusă în pericol")? Is the translation acceptable?
Language	Term	Location (doc page)	English	Translation	Observation	EU-FORA fellow reply
RO	risk	10	7. Food that complies with specific Community provisions governing food safety shall be deemed to be safe insofar as the aspects covered by the specific Community provisions are concerned.	(7) Produsele alimentare care sunt în conformitate cu prevederile comunitare speciale ce reglementează siguranța produselor alimentare se consideră ca neprezentând riscuri cu privire la aspectele acoperite de dispozițiile comunitare speciale.	s "shall be deemed to be safe" translated with the word for "hazard" with the meaning of "not reprezenting risks" ("neprezentând riscuri")? Is the translation acceptable?
RO	risk	10	8. Conformity of a food with specific provisions applicable to that food shall not bar the competent authorities from taking appropriate measures to impose restrictions on it being placed on the market or to require its withdrawal from the market where there are reasons to suspect that, despite such conformity, the food is unsafe.	(8) Conformitatea unui produs alimentar cu dispozițiile speciale aplicabile acelui produs alimentar nu împiedică autoritățile competente să ia măsuri adecvate de impunere a restricțiilor privind introducerea sa pe piață sau să solicite retragerea sa de pe piață, în cazurile în care există motive să se suspecteze că, în ciuda acestei conformități, produsul alimentare respectiv prezintă riscuri din…	Is "unsafe" translated as "presenting risks" ("prezintă riscurir")? Is the translation acceptable?
RO	risk	10	9. Where there are no specific Community provisions, food shall be deemed to be safe when it conforms to the specific provisions of national food law of the Member State in whose territory the food is marketed, such provisions being drawn up and applied without prejudice to the Treaty, in particular Articles 28 and 30 thereof.	(9) În cazul în care nu există prevederi comunitare speciale, se consideră că produsele alimentare nu prezintă riscuri atunci când se conformează prevederilor speciale ale legislației alimentare interne a statului membru pe al cărui teritoriu se comercializează alimentul respectiv, astfel de prevederi fiind redactate ș i aplicate fără a se aduce atingere prevederilor tratatului, în special artico…	Is "shall be deemed to be safe" translated with the word for "risc" ("riscuri") with the meaning of "not reprezenting risks" ("neprezentând riscuri")? Is the translation acceptable?
RO	risk	10	— make the food derived from food-producing animals unsafe for human consumption.	— produsele alimentare obținute de la animale pentru producția de alimente devin un factor de risc pentru consumul uman.	Is "unsafe" translated as "risk factor" ("factor de risc")? Is the translation acceptable?
New version
Language	Term	Location (doc page)	English	Translation	Observation	EU-FORA fellow reply
RO	hazard	-	-	-	-	-
Language	Term	Location (doc page)	English	Translation	Observation	EU-FORA fellow reply
RO	risk	-	-	-	-	-

## Sheet: REG 852-2004
Old version
Language	Term	Location (doc page)	English	Translation	Observation	EU-FORA fellow reply
RO	hazard	2	(10) Food hazards present at the level of primary production should be identified and adequately controlled to ensure the achievement of the objectives of this Regulation. However, in the case of the direct supply of small quantities of primary products, by the food business operator producing them, to the final consumer or to a local retail establishment, it is appropriate to protect public heal…	(10) Riscurile alimentare existente în etapa de producție primară ar trebui identificate și controlate în mod corespunzător pentru a permite atingerea obiectivelor prezentului regulament. Cu toate acestea, pentru situațiile în care mici cantități de produse primare sunt livrate direct consumatorilor sau unor unități locale de desfacere cu amănuntul, de către operatorul care le produce, este indic…	Is "hazards" translated as "risks" ("riscurile")? Is the translation acceptable?
RO	hazard	2	(11) The application of hazard analysis and critical control point (HACCP) principles to primary production is not yet generally feasible. However, guides to good practice should encourage the use of appropriate hygiene practices at farm level. Where necessary, specific hygiene rules for primary production should supplement these guides. It is appropriate for the hygiene requirements applicable t…	(11) Aplicarea principiilor analizei riscurilor ș i a punctelor critice de control (HACCP) la producția primară nu este de obicei realizabilă. Cu toate acestea, ghidurile de bună practică ar trebui să încurajeze aplicarea practicilor adecvate de igienă la nivelul fermelor. După caz, la aceste ghiduri trebuie să se adauge norme speciale de igienă aplicabile producției primare. Este indicat ca ceri…	Is "hazards" translated as "risks" ("riscurile")? Is the translation acceptable?
RO	hazard	4	(a) ‘food hygiene’, hereinafter called ‘hygiene’, means the measures and conditions necessary to control hazards and to ensure fitness for human consumption of a foodstuff taking into account its intended use;	(a) „igiena produselor alimentare”, denumită în continuare „igienă”, înseamnă măsurile și condiţiile necesare pentru a combate riscurile și a asigura adecvarea pentru consumul uman a unui produs alimentar, ţinând seama de utilizarea prevăzută;	Is "hazards" translated as "risks" ("riscurilor")? Is the translation acceptable?
RO	hazard	5	Hazard analysis and critical control points	Analiza riscurilor și a punctelor critice de control
RO	hazard	5	(a) identifying any hazards that must be prevented, eliminated or reduced to acceptable levels;	(a) identificarea oricăror riscuri care trebuie prevenite, eliminate sau reduse la un nivel acceptabil;	Is "hazards" translated as "risks" ("riscuri") in "any hazards"? Is the translation acceptable?
RO	hazard	5	(b) identifying the critical control points at the step or steps at which control is essential to prevent or eliminate a hazard or to reduce it to acceptable levels;	(b) identificarea punctelor critice de control în etapa sau etapele în care controlul este esenţial pentru a preveni riscul sau pentru a-l reduce la un nivel acceptabil;	Is "hazard" translated as "risk" ("riscul") in "eliminate a hazard"?
RO	hazard	6	(c) establishing critical limits at critical control points which separate acceptability from unacceptability for the prevention, elimination or reduction of identified hazards;	(c) stabilirea unor limite critice la punctele critice de control capabile să separe domeniul acceptabil de cel inacceptabil din punctul de vedere al prevenirii, eliminării sau reducerii riscurilor identificate;	Is "hazards" translated as "risks" ("riscurilor") in "identified hazards"? Is the translation acceptable?
RO	hazard	9	(c) explain the reasons for the adaptation, including, where relevant, by providing a summary of the hazard analysis carried out and any measures to be taken to ensure that the adaptation will not compromise the objectives of this Regulation;	(c) explică motivele acestei adaptări, inclusiv, atunci când este relevant, prin punerea la dispoziţie a unui sumar al analizei riscurilor efectuată cât și a măsurilor care urmează să fie luate pentru ca adaptarea să nu aducă atingere obiectivelor prezentului regulament și	Is "hazards" translated as "risks" ("riscurilor") in "hazard analysis"? Is the translation acceptable?
RO	hazard	11	3. Notwithstanding the general duty laid down in paragraph 2, food business operators are to comply with appropriate Community and national legislative provisions relating to the control of hazards in primary production and associated operations, including:	3. Fără a aduce atingere obligaţiei generale menţionate la alineatul (2), operatorii din sectorul alimentar trebuie să respecte dispoziţiile aplicabile ale legislaţiei comunitare și interne privind combaterea riscurilor în producţia primară și activităţile conexe, inclusiv:	Is "hazards" translated as "risks" ("riscurilor") in "control of hazard"? Is the translation acceptable?
RO	hazard	12	7. Food business operators are to keep and retain records relating to measures put in place to control hazards in an appropriate manner and for an appropriate period, commensurate with the nature and size of the food business. Food business operators are to make relevant information contained in these records available to the competent authority and receiving food business operators on request.	7. Operatorii din sectorul alimentar trebuie să întocmească și să ţină evidenţa măsurilor luate pentru a controla riscurile, în mod corespunzător și pe o perioadă de timp adecvată, proporţional cu caracterul și dimensiunea întreprinderii respective din sectorul alimentar. Operatorii din sectorul alimentar trebuie să pună informaţiile pertinente din aceste registre la dispoziţia autorităţii compet…	Is "hazards" translated as "risks" ("riscurile") in "control hazards"? Is the translation acceptable?
RO	hazard	13	1. National and Community guides referred to in Articles 7 to 9 of this Regulation should contain guidance on good hygiene practice for the control of hazards in primary production and associated operations.	1. Ghidurile naţionale și comunitare menţionate la articolele 7-9 din prezentul regulament trebuie să ofere îndrumări privind buna practică sanitară de combatere a riscurilor în producţia primară și activităţile conexe.	Is "hazards" translated as "risks" ("riscurile") in "control of hazards"? Is the translation acceptable?
RO	hazard	13	2. Guides to good hygiene practice should include appropriate information on hazards that may arise in primary production and associated operations and actions to control hazards, including relevant measures set out in Community and national legislation or national and Community programmes. Examples of such hazards and measures may include:	2. Ghidurile de bună practică sanitară trebuie să conţină informaţii adecvate cu privire la riscurile care pot apărea în producţia primară și activităţile conexe și măsurile de combatere a acestor riscuri, inclusiv măsurile relevante stabilite de legislaţia comunitară și internă sau de programele naţionale și comunitare. Printre aceste riscuri și măsuri se pot număra, de exemplu:	Is "hazards" translated as "risks" ("riscuri/riscurile") in "control hazards" and "such hazards"? Is the translation acceptable?
Language	Term	Location (doc page)	English	Translation	Observation	EU-FORA fellow reply
RO	risk	-	-	-	-
New version
Language	Term	Location (doc page)	English	Translation	Observation	EU-FORA fellow reply
RO	hazard	3	(a) ‘food hygiene’, hereinafter called ‘hygiene’, means the measures and conditions necessary to control hazards and to ensure fitness for human consumption of a foodstuff taking into account its intended use;	(a) „igiena produselor alimentare”, denumită în continuare „igienă”, înseamnă măsurile și condiţiile necesare pentru a combate riscurile și a asigura adecvarea pentru consumul uman a unui produs alimentar, ţinând seama de utilizarea prevăzută;	Is "hazards" translated as "risks" ("riscurilor") in "control hazards"? Is the translation acceptable?
RO	hazard	5	Hazard analysis and critical control points	Analiza riscurilor și a punctelor critice de control	Is "hazard" translated as "risks" ("riscuri") in "hazard analysis"? Is the translation acceptable?
RO	hazard	5	(a) identifying any hazards that must be prevented, eliminated or reduced to acceptable levels;	(a) identificarea oricăror riscuri care trebuie prevenite, eliminate sau reduse la un nivel acceptabil;	Is "hazards" translated as "risks" ("riscuri") in "any hazards"? Is the translation acceptable?
RO	hazard	5	(b) identifying the critical control points at the step or steps at which control is essential to prevent or eliminate a hazard or to reduce it to acceptable levels;	(b) identificarea punctelor critice de control în etapa sau etapele în care controlul este esenţial pentru a preveni riscul sau pentru a-l reduce la un nivel acceptabil;	Is "hazard" translated as "risk" ("riscul") in "eliminate a hazard"? Is the translation acceptable?
RO	hazard	5	(c) establishing critical limits at critical control points which separate acceptability from unacceptability for the prevention, elimination or reduction of identified hazards;	(c) stabilirea unor limite critice la punctele critice de control capabile să separe domeniul acceptabil de cel inacceptabil din punctul de vedere al prevenirii, eliminării sau reducerii riscurilor identificate;	Is "hazards" translated as "risks" ("riscurilor") in "identified hazards"? Is the translation acceptable?
RO	hazard	11	(c) explain the reasons for the adaptation, including, where relevant, by providing a summary of the hazard analysis carried out and any measures to be taken to ensure that the adaptation will not compromise the objectives of this Regulation;	(c) explică motivele acestei adaptări, inclusiv, atunci când este relevant, prin punerea la dispoziţie a unui sumar al analizei riscurilor efectuată cât și a măsurilor care urmează să fie luate pentru ca adaptarea să nu aducă atingere obiectivelor prezentului regulament și	Is "hazard" translated as "risks" ("riscuri") in "hazard analysis"? Is the translation acceptable?
RO	hazard	14	3. Notwithstanding the general duty laid down in paragraph 2, food business operators are to comply with appropriate Community and national legislative provisions relating to the control of hazards in primary production and associated operations, including:	3. Fără a aduce atingere obligaţiei generale menţionate la alineatul (2), operatorii din sectorul alimentar trebuie să respecte dispoziţiile aplicabile ale legislaţiei comunitare și interne privind combaterea riscurilor în producţia primară și activităţile conexe, inclusiv:	Is "hazards" translated as "risks" ("riscurilor") in "control of hazards"? Is the translation acceptable?
RO	hazard	15	7. Food business operators are to keep and retain records relating to measures put in place to control hazards in an appropriate manner and for an appropriate period, commensurate with the nature and size of the food business. Food business operators are to make relevant information contained in these records available to the competent authority and receiving food business operators on request.	7. Operatorii din sectorul alimentar trebuie să întocmească și să ţină evidenţa măsurilor luate pentru a controla riscurile, în mod corespunzător și pe o perioadă de timp adecvată, proporţional cu caracterul și dimensiunea întreprinderii respective din sectorul alimentar. Operatorii din sectorul alimentar trebuie să pună informaţiile pertinente din aceste registre la dispoziţia autorităţii compet…	Is "hazards" translated as "risks" ("riscurile") in "control hazards"?
RO	hazard	16	1. National and Community guides referred to in Articles 7 to 9 of this Regulation should contain guidance on good hygiene practice for the control of hazards in primary production and associated operations.	1. Ghidurile naţionale și comunitare menţionate la articolele 7-9 din prezentul regulament trebuie să ofere îndrumări privind buna practică sanitară de combatere a riscurilor în producţia primară și activităţile conexe.	Is "hazards" translated as "risks" ("riscurilor") in "control of hazards"? Is the translation acceptable?
RO	hazard	16	2. Guides to good hygiene practice should include appropriate information on hazards that may arise in primary production and associated operations and actions to control hazards, including relevant measures set out in Community and national legislation or national and Community programmes. Examples of such hazards and measures may include:	2. Ghidurile de bună practică sanitară trebuie să conţină informaţii adecvate cu privire la riscurile care pot apărea în producţia primară și activităţile conexe și măsurile de combatere a acestor riscuri, inclusiv măsurile relevante stabilite de legislaţia comunitară și internă sau de programele naţionale și comunitare. Printre aceste riscuri și măsuri se pot număra, de exemplu:	Is "hazards" translated as "risks" ("riscuri/riscurile") in "control hazards"? Is the translation acceptable?
Language	Term	Location (doc page)	English	Translation	Observation	EU-FORA fellow reply
RO	risk	24	(c) awareness of food safety hazards and of the importance of food safety and hygiene by all employees in the business;	(c) sensibilizarea tuturor angajaţilor întreprinderii cu privire la riscurile legate de siguranţa alimentară și la importanţa siguranţei și igienei alimentare;	Is "hazards" translated as "risks" ("riscurile") in "food safety hazards"? Is the translation acceptable?

## Sheet: REG 853-2004
Old version
Language	Term	Location (doc page)	English	Translation	Observation	EU-FORA fellow reply
RO	hazard	2	(2) Certain foodstuffs may present specific hazards to human health, requiring the setting of specific hygiene rules. This is particularly the case for food of animal origin, in which microbiological and chemical hazards have frequently been reported	(2) Anumite produse alimentare pot periclita în mod specific sănătatea umană ș i este necesară stabilirea unor norme specifice de igienă. Este, în special, cazul produselor alimentare de origine animală la care au fost frecvent constatate riscuri microbiologice ș i chimice.	Is "hazards" translated as "risks" ("riscuri") in microbiological and chemical hazards"? Is the translation acceptable?
RO	hazard	2	(7) The requirement in Regulation (EC) No /2004 ∗ whereby food business operators carrying out any stage of production, processing and distribution of food after primary production and associated operations must put in place, implement and maintain procedures based on hazard analysis and critical control point (HACCP) principles also permits simplification.	(7) Obligația, prevăzută de Regulamentul (CE) nr. 852/2004, pentru operatorii din sectorul alimentar, indiferent de stadiul în care intervin în procesul de producție, de prelucrare ș i de distribuție a produselor alimentare după producția primară ș i operațiunile conexe de a introduce, de a aplica ș i de a menține proceduri bazate pe analiza riscurilor ș i controlul punctelor critice (HACCP) cont…	Is "hazards" translated as "risks" ("riscurilor") in "hazard analysis and critical control point (HACCP)"? Is the translation acceptable?
RO	hazard	3	(22) In order to ensure proper inspection of hunted wild game placed on the Community market, bodies of hunted animals and their viscera should be presented for official post-mortem inspection at a game-handling establishment. However, to preserve certain hunting traditions without prejudicing food safety, it is appropriate to provide for training for hunters who place wild game on the market for…	(22) Pentru a asigura o verificare adecvată a cărnii de vânat sălbatic introdusă pe piața Comunității, corpul animalelor vânate ș i viscerele acestora ar trebui prezentate pentru o inspecție veterinară oficială post mortem într-o unitate de prelucrare a vânatului. Cu toate acestea, pentru menținerea anumitor tradiții de vânătoare fără a afecta siguranța alimentelor, este necesar să se prevadă o f…	Is "hazards" translated as "risks" ("riscurile") in "anomalies or hazards" and "specific risks"? Is the translation acceptable?
RO	hazard	3	(23) This Regulation should establish criteria for raw milk pending the adoption of new requirements for its placing on the market. These criteria should be trigger values, implying that, in the event of any overshooting, food business operators are to take corrective action and to notify the competent authority. The criteria should not be maximum figures beyond which raw milk cannot be placed on…	(23) Prezentul regulament ar trebui să definească, până la adoptarea unor noi cerințe privind introducerea laptelui crud pe piață, criteriile care se aplică acestuia. Aceste criterii ar trebui să aibă forma unor valori de declanș are: în cazul depăș irii acestor valori, operatorii din sectorul alimentar trebuie să ia măsuri de corectare ș i să informeze autoritatea competentă despre aceasta. Nu a…	Is "risk" missing in the English version? Is the translation acceptable? Is the translation acceptable?
RO	hazard	8	(b) the experience gained from the implementation of HACCP-based systems pursuant to Article 5 of Regulation (EC) No /2004* ;	(b) experiența acumulată în cadrul aplicării sistemelor bazate pe analiza riscurilor și puncte de control decisiv, în conformitate cu articolul 5 din Regulamentul (CE) nr. 852/2004;	Is the word "risk" ("riscurilor") used for expressing "hazard analysis and critical control points (HACCP)" in the Romanian version? Is the translation acceptable? Is the translation acceptable?
RO	hazard	8	(c) explain the reasons for the adaptation, including, where relevant, by providing a summary of the hazard analysis carried out and any measures to be taken to ensure that the adaptation will not compromise the objectives of this Regulation; and	c) explică motivele adaptării, furnizând inclusiv, după caz, o sinteză a analizei riscului ș i indicând măsurile care trebuie luate pentru ca adaptarea să nu compromită realizarea obiectivelor alimentare ale prezentului regulament	Is "hazard" translated as "risk" ("riscului") in "hazard anaysis"? Is the translation acceptable?
RO	hazard	9	8) to specify criteria for determining when epidemiological data indicate that a fishing ground does not present a health hazard with regard to the presence of parasites and, consequently, for determining when the competent authority may authorise food business operators not to freeze fishery products in accordance with Annex III, Section VIII, Chapter III, Part D;	8. a specifica criteriile care să permită determinarea momentului în care informațiile epidemiologice arată că un loc de pescuit nu prezintă riscuri pentru sănătate din punctul de vedere al paraziților ș i, prin urmare, a momentului în care autoritatea competentă poate autoriza operatorii din sectorul alimentar să nu congeleze produsele pescăreș ti în conformitate cu anexa III secțiunea VIII capi…	Is "hazard" translated as "risk" ("riscului") in "health hazard"? Is the translation acceptable?
RO	hazard	16	SECTION II: OBJECTIVES OF HACCP-BASED PROCEDURES	SECȚIUNEA II: OBIECTIVELE PROCEDURILOR BAZATE PE ANALIZA RISCURILOR Ș I PUNCTE DE CONTROL DECISIV	Is the word "risk" ("riscurilor") used for expressing "hazard analysis and critical control points (HACCP)" in the Romanian version? Is the translation acceptable? Is the translation acceptable?
RO	hazard	16	1. Food business operators operating slaughterhouses must ensure that the procedures that they have put in place in accordance with the general requirements of Article 5 of Regulation (EC) No …/2004 ∗ meet the requirements that the hazard analysis shows to be necessary and the specific requirements listed in paragraph 2.	1. Este necesar ca operatorii din sectorul alimentar care administrează abatoare să se asigure că procedurile pe care le pun în aplicare în conformitate cu cerințele generale prevăzute la articolul 5 din Regulamentul (CE) nr. 852/2004 respectă cerințele a căror necesitate este pusă în evidență de analiza riscului ș i cerințele specifice menționate la alineatul (2).	Is "hazard" translated as "risk" ("riscului") in "hazard analysis"? Is the translation acceptable?
RO	hazard	37	(iii) steaming under pressure in an enclosed space satisfying the requirements relating to cooking time and the internal temperature of the mollusc flesh mentioned under (i). A validated methodology must be used. Procedures based on the HACCP principles must be in place to verify the uniform distribution of heat.	(iii) fierberea în aburi sub presiune într-un spațiu închis unde sunt respectate cel puțin cerințele privind timpul ș i temperatura internă a cărnii moluș telor prevăzute la punctul (i). Este necesar să fie utilizată o metodologie validată. Este necesar să fie puse în aplicare proceduri bazate pe principiile analizei riscurilor ș i punctelor de control decisiv pentru a verifica omogenitatea distr…	Is the word "risk" ("riscurilor") used for expressing "hazard analysis and critical control points (HACCP)" in the Romanian version? Is the translation acceptable?
RO	hazard	44	6. Where fish are headed and/or gutted on board, such operations must be carried out hygienically as soon as possible after capture, and the products must be washed immediately and thoroughly with potable water or clean water. In that event, the viscera and parts that may constitute a danger to public health must be removed as soon as possible and kept apart from products intended for human consu…	6. Atunci când peștii sunt decapitați ș i/sau eviscerați la bord, aceste operațiuni trebuie să fie efectuate igienic ș i de îndată ce este posibil după ce au fost capturați, iar produsele trebuie să fie imediat spălate cu apă potabilă sau apă curată din abundență. În acest caz, viscerele ș i părțile care pot constitui un pericol pentru sănătatea publică trebuie să fie îndepărtate cât mai repede ș…	Is "danger" translated using the word for "hazard" ("pericol")? Should there be a differentiation between danger and hazard? Is the translation acceptable?
RO	hazard	54	5. After breaking, each particle of the egg product must undergo processing as quickly as possible to eliminate microbiological hazards or to reduce them to an acceptable level. A batch that has been insufficiently processed may immediately undergo processing again in the same establishment, if this processing renders it fit for human consumption. When a batch is found to be unfit for human consu…	5. după spargere, este necesar ca produsul din ouă să fie supus integral, cât mai repede posibil, unei prelucrări care să elimine riscurile microbiologice sau să le aducă la un nivel acceptabil. Un lot a cărui prelucrare a fost insuficientă poate fi supus fără întârziere unei noi prelucrări în aceeaș i unitate, cu condiția ca această prelucrare să îl facă propriu pentru consumul uman. În cazul în…	Is "hazards" translated as "riscurile" ("riscului") in "microbiological hazards"? Is the translation acceptable?
Language	Term	Location (doc page)	English	Translation	Observation	EU-FORA fellow reply
RO	risk	42	2. Holds must be separated from the engine compartments and from the crew quarters by partitions which are sufficient to prevent any contamination of the stored fishery products. Holds and containers used for the storage of fishery products must ensure their preservation under satisfactory conditions of hygiene and, where necessary, ensure that melt water does not remain in contact with the produ…	2. Calele trebuie să fie separate de hala maș inilor și de spațiile rezervate echipajului prin pereți care permit îndepărtarea oricărui risc de contaminare a produselor pescăreș ti depozitate. Recipientele utilizate pentru depozitarea produselor pescăreș ti trebuie să poată asigura conservarea acestora în condiții de igienă satisfăcătoare și, după caz, să permită o evacuare adecvată astfel încât …	Is the word "risk" ("risc") used for expressing "prevent any contamination" in the Romanian version? Is the translation acceptable?
RO	risk	50	(d) the identification of animals undergoing medical treatment likely to transfer residues to the milk, and that milk obtained from such animals before the end of the prescribed withdrawal period is not used for human consumption; and	(d) să fie identificate animalele supuse unui tratament în urma căruia există riscul ca reziduuri de medicamente să treacă în lapte ș i laptele care provine de la aceste animale înainte de încheierea perioadei de aș teptare prescrise să nu fie utilizat pentru consumul uman	Is the word "risk" ("riscul") used for expressing "likely to transfer" in the Romanian version? Is the translation acceptable?
RO	risk	58	(b) The storage rooms must be kept in a satisfactory state of cleanliness and repair, so that they do not constitute a source of contamination for the raw materials	(b) este necesar ca spațiile de depozitare să fie păstrate în bună stare de întreținere ș i igienă astfel încât să nu existe riscul contaminării materiilor prime;	Is the word "risk" ("riscul") used for expressing "not constitute a source of contamination" in the Romanian version? Is the translation acceptable?
RO	risk	59	(b) The storage rooms must be kept in a satisfactory state of cleanliness and repair, so that they do not constitute a source of contamination for the raw materials.	(b) este necesar ca spațiile de depozitare să fie păstrate în bună stare de întreținere ș i igienă, astfel încât să nu existe riscul contaminării materiilor prime;	Is the word "risk" ("riscul") used for expressing "not constitute a source of contamination" in the Romanian version? Is the translation acceptable?
New version
Language	Term	Location (doc page)	English	Translation	Observation	EU-FORA fellow reply
RO	hazard	11	(i) the criteria for determining when epidemiological data indicate that a fishing ground does not present a health hazard with regard to the presence of parasites and, consequently, for determining when the competent authority may authorise food business operators not to freeze fishery products in accordance with Annex III, Section VIII, Chapter III, Part D;	(i) criteriile de determinare a cazurilor în care informaţiile epidemiologice indică faptul că un loc de pescuit nu prezintă riscuri pentru sănătate din punctul de vedere al paraziţilor și, prin urmare, de determinare a cazurilor în care autoritatea competentă poate autoriza operatorii din sectorul alimentar să nu congeleze produsele pescărești în conformitate cu anexa III secţiunea VIII capitolu…	Is "hazards" translated as "risks" ("riscuri") in "health hazard"? Is the translation acceptable?
RO	hazard	12	(c) explain the reasons for the adaptation, including, where relevant, by providing a summary of the hazard analysis carried out and any measures to be taken to ensure that the adaptation will not compromise the objectives of this Regulation;	(c) explică motivele adaptării, furnizând inclusiv, după caz, o sinteză a analizei riscului și indicând măsurile care trebuie luate pentru ca adaptarea să nu compromită realizarea obiectivelor alimentare ale prezentului regulament	Is "hazard" translated as "risk" ("riscului") in "hazard analysis"? Is the translation acceptable?
RO	hazard	21	SECTION II: OBJECTIVES OF HACCP-BASED PROCEDURES	SECŢIUNEA II: OBIECTIVELE PROCEDURILOR BAZATE PE ANALIZA RISCURILOR ȘI PUNCTE DE CONTROL DECISIV	Is "hazards" translated as "risks" ("riscurilor") in "HACCP-BASED PROCEDURES"? Is the translation acceptable?
RO	hazard	21	1. Food business operators operating slaughterhouses must ensure that the procedures that they have put in place in accordance with the general requirements of Article 5 of Regulation (EC) No 852/2004 meet the requirements that the hazard analysis shows to be necessary and the specific requirements listed in point 2.	1. Este necesar ca operatorii din sectorul alimentar care administrează abatoare să se asigure că procedurile pe care le pun în aplicare în conformitate cu cerinţele generale prevăzute la articolul 5 din Regulamentul (CE) nr. 852/2004 respectă cerinţele a căror necesitate este pusă în evidenţă de analiza riscului și cerinţele specifice menţionate la alineatul (2).	Is "hazard" translated as "risk" ("riscului") in "hazard analysis"? Is the translation acceptable?
RO	hazard	52	(iii) steaming under pressure in an enclosed space satisfying the requirements relating to cooking time and the internal temperature of the mollusc flesh mentioned under (i). A validated methodology must be used. Procedures based on the HACCP principles must be in place to verify the uniform distribution of heat.	(iii) fierberea în aburi sub presiune într-un spaţiu închis unde sunt respectate cel puţin cerinţele privind timpul și temperatura internă a cărnii moluștelor prevăzute la punctul (i). Este necesar să fie utilizată o metodologie validată. Este necesar să fie puse în aplicare proceduri bazate pe principiile analizei riscurilor și punctelor de control decisiv pentru a verifica omogenitatea distribu…	Is the word "risk" ("riscurilor") used for expressing "hazard analysis and critical control points (HACCP)" in the Romanian version? Is the translation acceptable?
RO	hazard	63	6. Where fish are headed and/or gutted on board, such operations must be carried out hygienically as soon as possible after capture, and the fishery products must be washed immediately. The viscera and parts that may constitute a danger to public health must be removed as soon as possible and kept apart from fishery products intended for human consumption. Livers and roes intended for human consu…	6. Atunci când peștii sunt decapitaţi și/sau evisceraţi la bord, astfel de operaţiuni trebuie să fie efectuate în mod igienic de îndată ce este posibil după capturare, iar produsele pescărești trebuie să fie spălate imediat. Viscerele și părţile care pot constitui un pericol pentru sănătatea publică trebuie să fie îndepărtate cât mai repede și păstrate separat de produsele pescărești destinate co…	Is "danger" translated using the word for "hazard" ("pericol")? Should there be a differentiation between danger and hazard? Is the translation acceptable?
RO	hazard	77	5. After breaking, each particle of the liquid egg must undergo processing as quickly as possible to eliminate microbiological hazards or to reduce them to an acceptable level. A batch that has been insufficiently processed may immediately undergo processing again in the same establishment if this processing renders it fit for human consumption. Where a batch is found to be unfit for human consum…	5. după spargere, oul lichid trebuie să fie supus integral, cât mai repede posibil, unui tratament care urmărește eliminarea riscurilor microbiologice sau reducerea acestora la un nivel acceptabil. Un lot a cărui prelucrare este insuficientă poate face obiectul unei noi transformări în aceeași unitate, cu condiţia ca prin această prelucrare să devină adecvat consumului uman. În cazul în care un l…	Is "hazards" translated as "risks" ("riscurilor") in "microbiological hazards"? Is the translation acceptable?
Language	Term	Location (doc page)	English	Translation	Observation	EU-FORA fellow reply
RO	risk	61	2. Holds must be separated from the engine compartments and from the crew quarters by partitions which are sufficient to prevent any contamination of the stored fishery products. Holds and containers used for the storage of fishery products must ensure their preservation under satisfactory conditions of hygiene and, where necessary, ensure that melt water does not remain in contact with the produ…	2. Calele trebuie să fie separate de hala mașinilor și de spaţiile rezervate echipajului prin pereţi care permit îndepărtarea oricărui risc de contaminare a produselor pescărești depozitate. Recipientele utilizate pentru depozitarea produselor pescărești trebuie să poată asigura conservarea acestora în condiţii de igienă satisfăcătoare și, după caz, să permită o evacuare adecvată astfel încât apa…	Is the word "risk" ("risc") used for expressing "prevent any contamination)" in the Romanian version? Is the translation acceptable?
RO	risk	65	must ensure that the raw material or finished product undergo a freezing treatment in order to kill viable parasites that may be a risk to the health of the consumer.	trebuie să se asigure că materia primă sau produsul finit este supus unui tratament de congelare pentru a distruge paraziţii viabili care ar putea constitui un pericol pentru sănătatea consumatorului.	Is "risk" translated as "hazard" ("pericol") in "risk to health"? Is the translation acceptable?
RO	risk	65	Fresh, prepared, frozen and processed fishery products belonging to the family Gempylidae, in particular Ruvettus pretiosus and Lepidocybium flavobrunneum, may only be placed on the market in wrapped/packaged form and must be appropriately labelled to provide information to the consumer on preparation/cooking methods and on the risk related to the presence of substances with adverse gastrointesti…	Produsele pescărești proaspete, preparate, congelate și prelucrate din familia Gempylidae, în special Ruvettus pretiosus și Lepidocybium flavobrunneum, nu pot fi introduse pe piaţă decât ambalate sau împachetate și trebuie să fie etichetate în mod corespunzător pentru a informa consumatorul cu privire la metodele de preparare și/sau de fierbere, precum și cu privire la prezenţa substanţelor care …	Is "risk" missing in the Romanian version? Is the translation acceptable?
RO	risk	82	(b) The storage rooms must be kept in a satisfactory state of cleanliness and repair, so that they do not constitute a source of contamination for the raw materials.	(b) este necesar ca spaţiile de depozitare să fie păstrate în bună stare de întreţinere și igienă astfel încât să nu existe riscul contaminării materiilor prime;	Is the word "risk" used for the translation of "o that they do not constitute a source of contamination" the Romanian version? Is the translation acceptable?
RO	risk	85	(b) The storage rooms must be kept in a satisfactory state of cleanliness and repair, so that they do not constitute a source of contamination for the raw materials.	(b) este necesar ca spaţiile de depozitare să fie păstrate în bună stare de întreţinere și igienă, astfel încât să nu existe riscul contaminării materiilor prime;	Is the word "risk" used for the translation of "o that they do not constitute a source of contamination" the Romanian version? Is the translation acceptable?

## Sheet: REG 625-2017
Old version
Language	Term	Location (doc page)	English	Translation	Observation	EU-FORA fellow reply
RO	hazard	29	(d) an assessment of procedures on good manufacturing practices, good hygiene practices, good farming practices, and of procedures based on the principles of hazard analysis critical control points (HACCP);	(d) o evaluare a procedurilor privind bunele practici de fabricație, bunele practici de igienă, bunele practici agricole și a procedurilor bazate pe principiile analizei riscurilor și a punctelor critice de control (HACCP);	Is "hazard" translated as "risk" ("riscurilor") "hazard analysis"? Is the translation acceptable?
RO	hazard	35	(56) Regulation (EU) No 649/2012 of the European Parliament and of the Council of 4 July 2012 concerning the export and import of hazardous chemicals (OJ L 201, 27.7.2012, p. 60).	(56) Regulamentul (UE) nr. 649/2012 al Parlamentului European și al Consiliului din 4 iulie 2012 privind exportul și importul de produse chimice care prezintă risc (JO L 201, 27.7.2012, p. 60).	Is "hazardous" translated as "risk" ("risc") in "hazardous chemicals"? Is the translation acceptable?
Language	Term	Location (doc page)	English	Translation	Observation	EU-FORA fellow reply
RO	risk	-	-	-	-	-
New version
Language	Term	Location (doc page)	English	Translation	Observation	EU-FORA fellow reply
RO	hazard	18	(d) an assessment of procedures on good manufacturing practices, good hygiene practices, good farming practices, and of procedures based on the principles of hazard analysis critical control points (HACCP);	(d) o evaluare a procedurilor privind bunele practici de fabricaţie, bunele practici de igienă, bunele practici agricole și a procedurilor bazate pe principiile analizei riscurilor și a punctelor critice de control (HACCP);	Is "hazard" translated as "risk" ("anaizei riscurilor") in "hazard analysis"? Is the translation acceptable?
RO	hazard	39	(56) Regulation (EU) No 649/2012 of the European Parliament and of the Council of 4 July 2012 concerning the export and import of hazardous chemicals (OJ L 201, 27.7.2012, p. 60).	(56) Regulamentul (UE) nr. 649/2012 al Parlamentului European și al Consiliului din 4 iulie 2012 privind exportul și importul de produse chimice care prezintă risc (JO L 201, 27.7.2012, p. 60).	Is "hazardous" translated as "risk" ("risc") in "hazardous chemicals"? Is the translation acceptable?
Language	Term	Location (doc page)	English	Translation	Observation	EU-FORA fellow reply
RO	risk	-	-	-	-	-

## Sheet: REG 1381-2019
Language	Term	Location (doc page)	English	Translation	Observation	EU-FORA fellow reply
RO	hazard	-	-	-	-	-
Language	Term	Location (doc page)	English	Translation	Observation	EU-FORA fellow reply
RO	risk	-	-	-	-	-
