# Supplementary material for: Food Risk Analysis: Towards a Better Understanding of „Hazard” and „Risk” in EU food legislation
Source: Preprints.org preprint supplement (doi:10.20944/preprints202306.1556.v1), 2023-06-21
Supplement: Supplementary file 25 [file SK.xlsx]

## Sheet: REG 178-2002
Old version
Language	Term	Location (doc page)	English	Translation	Observation	EFSA Focal Point
SK	hazard	7	9. ‘risk’ means a function of the probability of an adverse health effect and the severity of that effect, consequential to a hazard;	9. „riziko“ znamená funkciu pravdepodobnosti nepriaznivého účinku na zdravotný stav a závažnosť tohto účinku vyplývajúceho z ohrozenia;	Is "hazard" translated as "threat" ("ohrozenia")? Is the translation acceptable?
SK	hazard	7	11. ‘risk assessment’ means a scientifically based process consisting of four steps: hazard identification, hazard characterisation, exposure assessment and risk characterisation;	11. „vyhodnotenie rizika“ znamená vedecky podložený proces pozostávajúci zo štyroch stupňov: identifikácia ohrozenia, charakteristika ohrozenia, vyhodnotenie miery vystavenia riziku a charakteristika rizika;	Is " hazard" translated as "threat" ("ohrozenia")? Is the translation acceptable?
SK	hazard	8	13. ‘risk communication’ means the interactive exchange of information and opinions throughout the risk analysis process as regards hazards and risks, risk-related factors and risk perceptions, among risk assessors, risk managers, consumers, feed and food businesses, the academic community and other interested parties, including the explanation of risk assessment findings and the basis of risk ma…	13. „oznámenie o riziku“ znamená vzájomnú výmenu informácií a názorov v priebehu procesu analýzy rizika, čo sa týka ohrození a rizík, faktorov súvisiacich s rizikom a vnímania rizík medzi tými, ktorí vyhodnocujú riziko, tými, ktorí sa zaoberajú riadením rizika, spotrebiteľmi, krmivárskymi a potravinárskymi podnikmi, akademickou obcou a inými zainteresovanými stranami, vrátane objasňovania zistení…	Is " hazard" translated as "threat" ("ohrození ")? Is the translation acceptable?
SK	hazard	8	14. ‘hazard’ means a biological, chemical or physical agent in, or condition of, food or feed with the potential to cause an adverse health effect;	14. „ohrozenie“ znamená biologický, chemický alebo fyzikálny faktor v potravinách alebo krmivách alebo podmienky, za ktorých potraviny alebo krmivá môžu vyvolať nepriaznivý účinok na zdravotný stav;	Is " hazard" translated as "threat" ("ohrozenie")? Is the translation acceptable?
SK	hazard	15	(f) the Panel on biological hazards;	f) pracovná skupina pre biologické riziká;	Is " hazards" translated as "risks" ("riziká")
Language	Term	Location (doc page)	English	Translation	Observation	EFSA Focal Point
SK	risk	5	(60) Recent food safety incidents have demonstrated the need to establish appropriate measures in emergency situations ensuring that all foods, whatever their type and origin, and all feed should be subject to common measures in the event of a serious risk to human health, animal health or the environment. Such a comprehensive approach to emergency food safety measures should allow effective acti…	(60) nedávne incidenty súvisiace s bezpečnosťou potravín preukázali potrebu zavedenia vhodných opatrení v mimoriadnych situáciách, ktoré by zabezpečili, že všetky potraviny, bez ohľadu na ich typ a pôvod a všetky krmivá budú podliehať spoločným opatreniam v prípade vážneho nebezpečenstva pre ľudské zdravie, zdravie zvierat alebo životné prostredie. Takýto komplexný prístup k mimoriadnym opatrenia…	Is "risk" translated as "hazard" ("nebezpečenstva")? Is the translation acceptable?
New version
Language	Term	Location (doc page)	English	Translation	Observation	EFSA Focal Point
SK	hazard	20	(f) the Panel on biological hazards;	f) pracovná skupina pre biologické riziká;	Is "hazards" translated as "risks" ("riziká") in "biological hazards"?
Language	Term	Location (doc page)	English	Translation	Observation	EFSA Focal Point
SK	risk	-	-	-	-	-

## Sheet: REG 852-2004
Old version
Language	Term	Location (doc page)	English	Translation	Observation	EFSA Focal Point
SK	hazard	9	3. Member States may, without compromising achievement of the objectives of this Regulation, adopt, in accordance with paragraphs 4 to 7 of this Article, national measures adapting the requirements laid down in Annex II.	3. V súlade s odsekmi 4 až 7 tohto článku môžu členské štáty bez ohrozenia dosiahnutia cieľov tohto nariadenia prijať vnútroštátne opatrenia, ktorými sa upravujú požiadavky ustanovené v prílohe II.	Is the word "threats" ("ohrozenia") mentioned in the Slovak version? Is the translation acceptable?
SK	hazard	17	5. Steam used directly in contact with food is not to contain any substance that presents a hazard to health or is likely to contaminate the food.	5. Para používaná v priamom styku s potravinami nesmie obsahovať žiadnu látku, ktorá predstavuje riziko pre zdravie alebo by mohla kontaminovať potraviny.	Is "hazard" translated as "risk" ("riziko") in "Is the translation correct? Is "threats" ("ohrozenia") mentioned in translation?hazard to health"?
Language	Term	Location (doc page)	English	Translation	Observation	EFSA Focal Point
SK	risk	-	-	-	-	-
New version
Language	Term	Location (doc page)	English	Translation	Observation	EFSA Focal Point
SK	hazard	10	3. Member States may, without compromising achievement of the objectives of this Regulation, adopt, in accordance with paragraphs 4 to 7 of this Article, national measures adapting the requirements laid down in Annex II.	3. V súlade s odsekmi 4 až 7 tohto článku môžu členské štáty bez ohrozenia dosiahnutia cieľov tohto nariadenia prijať vnútroštátne opatrenia, ktorými sa upravujú požiadavky ustanovené v prílohe II.	Is the word "threats" ("ohrozenia") mentioned in the Slovak version? Is the translation correct?
SK	hazard	22	5. Steam used directly in contact with food is not to contain any substance that presents a hazard to health or is likely to contaminate the food.	5. Para používaná v priamom styku s potravinami nesmie obsahovať žiadnu látku, ktorá predstavuje riziko pre zdravie alebo by mohla kontaminovať potraviny.	Is "hazard" translated as "risk" ("riziko") in "hazard to health"?
Language	Term	Location (doc page)	English	Translation	Observation	EFSA Focal Point
SK	risk	-	-	-	-	-

## Sheet: REG 853-2004
Old version
Language	Term	Location (doc page)	English	Translation	Observation	EFSA Focal Point
SK	hazard	43	6. Where fish are headed and/or gutted on board, such operations must be carried out hygienically as soon as possible after capture, and the products must be washed immediately and thoroughly with potable water or clean water. In that event, the viscera and parts that may constitute a danger to public health must be removed as soon as possible and kept apart from products intended for human consu…	6. Ak sa ryby zbavujú hláv a/alebo pitvú na palube, tieto operácie sa musia vykonávať hygienicky a čo najskôr po výlove a produkty sa musia ihneď a dôkladne umyť pitnou vodou alebo čistou vodou. V tomto prípade sa musia čo najskôr odstrániť vnútornosti a časti, ktoré by mohli predstavovať nebezpečenstvo pre zdravie ľudí a musia sa uchovávať oddelene od produktov určených na ľudskú spotrebu. Pečen…	Is "danger" translated as "hazard" ("nebezpečenstvo")? Should it be a differentiation between danger and hazard?
Language	Term	Location (doc page)	English	Translation	Observation	EFSA Focal Point
SK	risk	-	-	-	-	-
New version
Language	Term	Location (doc page)	English	Translation	Observation	EFSA Focal Point
SK	hazard	-	-	-	-	-
Language	Term	Location (doc page)	English	Translation	Observation	EFSA Focal Point
SK	risk	65	must ensure that the raw material or finished product undergo a freezing treatment in order to kill viable parasites that may be a risk to the health of the consumer.	musia zabezpečiť, aby surovina alebo hotový výrobok prešli ošetrením zamrazením s cieľom zahubiť životaschopné parazity potenciálne nebezpečné z hľadiska zdravia spotrebiteľa.	Is "risk" translated as "hazard" ("nebezpečné") in "risk to the health"?

## Sheet: REG 625-2017
Old version
Language	Term	Location (doc page)	English	Translation	Observation	EFSA Focal Point
SK	hazard	-	-	-	-	-
Language	Term	Location (doc page)	English	Translation	Observation	EFSA Focal Point
SK	risk	-	-	-	-	-
New version
Language	Term	Location (doc page)	English	Translation	Observation	EFSA Focal Point
SK	hazard	-	-	-	-	-
Language	Term	Location (doc page)	English	Translation	Observation	EFSA Focal Point
SK	risk	-	-	-	-	-

## Sheet: REG 1381-2019
Language	Term	Location (doc page)	English	Translation	Observation	EFSA Focal Point
SK	hazard	-	-	-	-	-
Language	Term	Location (doc page)	English	Translation	Observation	EFSA Focal Point
SK	risk	-	-	-	-	-
