# Supplementary material for: Food Risk Analysis: Towards a Better Understanding of „Hazard” and „Risk” in EU food legislation
Source: Preprints.org preprint supplement (doi:10.20944/preprints202306.1556.v1), 2023-06-21
Supplement: Supplementary file 26 [file SL.xlsx]

## Sheet: REG 178-2002
Old version
Language	Term	Location (doc page)	English	Translation	Observation	EU-FORA fellow reply
SL	hazard	8	13. ‘risk communication’ means the interactive exchange of information and opinions throughout the risk analysis process as regards hazards and risks, risk-related factors and risk perceptions, among risk assessors, risk managers, consumers, feed and food businesses, the academic community and other interested parties, including the explanation of risk assessment findings and the basis of risk ma…	13. „obveščanje o tveganju“ pomeni interaktivno izmenjavo informacij in mnenj v okviru analize tveganja o dejavnikih tveganja in tveganjih, drugih dejavnikih, ki vplivajo na tveganja in zaznavanjih tveganj med tistimi, ki ocenjujejo tveganja, tistimi, ki skrbijo za obvladovanje tveganj, potrošniki, živilsko dejavnostjo in dejavnostjo proizvodnje krme, znanstveniki in drugimi zainteresiranimi skup…	Is "hazards" translated as "risk factors" ("dejavnikih tveganja")? Is this acceptable in the context in which "hazard" is usually reffered to by ""nevarnosti"? The paragraph above this one reffers aslso to "nevarnosti" when talking about hazard.
SL	hazard	8	14. ‘hazard’ means a biological, chemical or physical agent in, or condition of, food or feed with the potential to cause an adverse health effect;	14. „dejavnik tveganja“ je biološki, kemijski ali fizikalni dejavnik v živilu ali krmi oziroma lastnost ali stanje živila ali krme, ki lahko ogroža zdravje ljudi;	Is "hazards" translated as "risk factors" ("dejavnikih tveganja")? Is this acceptable in the context in which "hazard" is usually reffered to by ""nevarnosti"? The paragraph above this one reffers aslso to "nevarnosti" when talking about hazard.
SL	hazard	15	(f) the Panel on biological hazards;	(f) svet za biološke dejavnike tveganja;	Is "hazards" translated as " risk factors" ("dejavnike tveganja") in "biological hazards"?
Language	Term	Location (doc page)	English	Translation	Observation	EU-FORA fellow reply
SL	risk	11	For that purpose, they shall maintain a system of official controls and other activities as appropriate to the circumstances, including public communication on food and feed safety and risk, food and feed safety surveillance and other monitoring activities covering all stages of production, processing and distribution.	Za to vzdržujejo sistem uradnega nadzora in izvajajo druge okoliščinam primerne ukrepe, vključno s seznanjanjem javnosti o varnosti in zdravstveni ustreznosti živil in krme, nadzorom varnosti živil in krme in drugimi ukrepi spremljanja in nadzora, ki zajemajo vse faze pridelave, predelave in distribucije.	Is "food and feed safety and risk" translated as "food and feed safety and health adequacy" ("da nosilci živilske dejavnosti in dejavnosti proizvodnje krme v vseh fazah pridelave")? Is the translation acceptable?
New version
Language	Term	Location (doc page)	English	Translation	Observation	EU-FORA fellow reply
SL	hazard	4	13. ‘risk communication’ means the interactive exchange of information and opinions throughout the risk analysis process as regards hazards and risks, risk-related factors and risk perceptions, among risk assessors, risk managers, consumers, feed and food businesses, the academic community and other interested parties, including the explanation of risk assessment findings and the basis of risk ma…	13. „obveščanje o tveganju“ pomeni interaktivno izmenjavo informacij in mnenj v okviru analize tveganja o dejavnikih tveganja in tveganjih, drugih dejavnikih, ki vplivajo na tveganja in zaznavanjih tveganj med tistimi, ki ocenjujejo tveganja, tistimi, ki skrbijo za obvladovanje tveganj, potrošniki, živilsko dejavnostjo in dejavnostjo ►C1 poslovanja s krmo ◄, znanstveniki in drugimi zainteresirani…	Is "hazards" translated as "risk factors" ("dejavnikih tveganja")? Is this acceptable in the context in which "hazard" is usually reffered to by ""nevarnosti"? The paragraph above this one reffers aslso to "nevarnosti" when talking about hazard.
SL	hazard	4	14. ‘hazard’ means a biological, chemical or physical agent in, or condition of, food or feed with the potential to cause an adverse health effect;	14. „dejavnik tveganja“ je biološki, kemijski ali fizikalni dejavnik v živilu ali krmi oziroma lastnost ali stanje živila ali krme, ki lahko ogroža zdravje ljudi;	Is "hazards" translated as "risk factors" ("dejavnikih tveganja")? Is this acceptable in the context in which "hazard" is usually reffered to by ""nevarnosti"? The paragraph above this one reffers aslso to "nevarnosti" when talking about hazard.
SL	hazard	20	(f) the Panel on biological hazards;	(f) svet za biološke dejavnike tveganja;	Is "hazards" translated as "risk factors" ("tveganja") in "biological hazards"?
Language	Term	Location (doc page)	English	Translation	Observation	EU-FORA fellow reply
SL	risk	-	-	-	-	-

## Sheet: REG 852-2004
Old version
Language	Term	Location (doc page)	English	Translation	Observation	EU-FORA fellow reply
SL	hazard	4	(10) Food hazards present at the level of primary production should be identified and adequately controlled to ensure the achievement of the objectives of this Regulation. However, in the case of the direct supply of small quantities of primary products, by the food business operator producing them, to the final consumer or to a local retail establishment, it is appropriate to protect public heal…	(10) Doseganje ciljev te uredbe je treba zagotoviti tako, da se tveganja za živila določijo in ustrezno nadzorujejo na ravni primarne proizvodnje. Vendar pa je v primeru, ko nosilec živilske dejavnosti, ki primarne proizvode proizvaja, njihove majhne količine neposredno dobavlja končnemu potrošniku ali lokalnemu maloprodajnemu podjetju, primerno varovati javno zdravje z nacionalno zakonodajo, zla…	Is "hazards" translated as "risk" ("tveganj") in "food hazards"?
SL	hazard	4	(11) The application of hazard analysis and critical control point (HACCP) principles to primary production is not yet generally feasible. However, guides to good practice should encourage the use of appropriate hygiene practices at farm level. Where necessary, specific hygiene rules for primary production should supplement these guides. It is appropriate for the hygiene requirements applicable t…	(11) Uporaba načel analize tveganj in kritičnih nadzornih točk (HACCP) v primarni proizvodnji še ni splošno izvedljiva. Vendar pa morajo smernice za dobro prakso spodbujati uporabo ustreznih higienskih praks na ravni kmetij. Kadar je to potrebno, je treba posebna higienska pravila za primarno proizvodnjo dopolniti z navedenimi smernicami. Primerno je, da se higienske zahteve, ki veljajo za primar…	Is "hazards" translated as "risk" ("tveganj") in hazard analysis?
SL	hazard	10	(a) ‘food hygiene’, hereinafter called ‘hygiene’, means the measures and conditions necessary to control hazards and to ensure fitness for human consumption of a foodstuff taking into account its intended use;	(a) „higiena živil“, v nadaljnjem besedilo „higiena“, pomeni ukrepe in pogoje, potrebne za nadzor tveganj in za zagotovitev ustreznosti živil za prehrano ljudi, ob upoštevanju njihove predvidene uporabe;	Is "hazard" translated as "risk" ("tveganj") in control hazards?
SL	hazard	11	(f) ‘contamination’ means the presence or introduction of a hazard;	(f) „kontaminacija“ pomeni prisotnost ali nastanek tveganja;	Is "hazard" translated as "risk" ("tveganj") in " introduction of a hazard"?
SL	hazard	11	(l) ‘hermetically sealed container’ means a container that is designed and intended to be secure against the entry of hazards;	(l) „hermetično zaprta posoda“ pomeni posodo, ki je oblikovana tako, da je varna pred tveganji in je temu namenjena;	Is "hazards" translated as "risk" ("tveganj") in "entry of hazards"?
SL	hazard	15	Hazard analysis and critical control points	Analiza tveganj in kritičnih kontrolnih točk	Is "hazards" translated as "risk" ("tveganj") in "hazard analysis"?
SL	hazard	15	(a) identifying any hazards that must be prevented, eliminated or reduced to acceptable levels;	(a) ugotavljanje vseh tveganj, ki jih je treba preprečiti, odpraviti ali znižati na sprejemljive ravni;	Is "hazards" translated as "risk" ("tveganj") in "any hazards"?
SL	hazard	15	(b) identifying the critical control points at the step or steps at which control is essential to prevent or eliminate a hazard or to reduce it to acceptable levels;	(b) ugotavljanje kritičnih kontrolnih točk v fazi ali fazah, na katerih je nadzor nujen za preprečitev ali odpravo tveganja ali za njegovo znižanje na sprejemljivo raven:	Is "hazard" translated as "risk" ("tveganja") in "eliminate a hazard"?
SL	hazard	16	(c) establishing critical limits at critical control points which separate acceptability from unacceptability for the prevention, elimination or reduction of identified hazards;	(c) določitev kritičnih mej na kritičnih kontrolnih točkah, ki ločijo dopustno od nedopustnega pri preprečevanju, odpravi ali znižanju ugotovljenih tveganj;	Is "hazards" translated as "risk" ("tveganj") in "identified hazard"?
SL	hazard	26	(c) explain the reasons for the adaptation, including, where relevant, by providing a summary of the hazard analysis carried out and any measures to be taken to ensure that the adaptation will not compromise the objectives of this Regulation;	(c) razlago razlogov za prilagoditev, kadar je to ustrezno, tudi s povzetkom opravljene analize tveganj in vseh ukrepov, ki jih je treba sprejeti, da prilagoditev ne bo ogrozila ciljev te uredbe; in	Is "hazard" translated as "risk" ("tveganja") in "hazard analysis"?
SL	hazard	32	3. Notwithstanding the general duty laid down in paragraph 2, food business operators are to comply with appropriate Community and national legislative provisions relating to the control of hazards in primary production and associated operations, including:	3. Ne glede na splošno obveznost, določeno v odstavku 2, morajo nosilci živilske dejavnosti spoštovati ustrezne določbe zakonodaje Skupnosti in nacionalne zakonodaje v zvezi z nadzorom tveganj v primarni proizvodnji in povezanih delovnih postopkih, vključno z:	Is "hazards" translated as "risk" ("tveganj") in "control of hazards"?
SL	hazard	5	7. Food business operators are to keep and retain records relating to measures put in place to control hazards in an appropriate manner and for an appropriate period, commensurate with the nature and size of the food business. Food business operators are to make relevant information contained in these records available to the competent authority and receiving food business operators on request.	7. Nosilci živilske dejavnosti morajo na primeren način in za ustrezno obdobje voditi in hraniti evidenco, ki se nanaša na ukrepe, sprejete za nadzor tveganj, ki je sorazmerna vrsti in velikosti živilske dejavnosti. Na zahtevo morajo nosilci živilske dejavnosti dati ustrezne informacije iz teh evidenc na voljo pristojnemu organu in nosilcu živilske dejavnosti, ki prevzema hrano.	Is "hazards" translated as "risk" ("tveganj") in "control hazards"?
SL	hazard	13	1. National and Community guides referred to in Articles 7 to 9 of this Regulation should contain guidance on good hygiene practice for the control of hazards in primary production and associated operations.	1. Nacionalne smernice in smernice Skupnosti iz členov od 7 do 9 te uredbe morajo vključevati smernice za dobro higiensko prakso za nadzor tveganj v primarni proizvodnji in z njo povezanih delovnih postopkih.	Is "hazards" translated as "risk" ("tveganj") in "control of hazards"?
SL	hazard	13	2. Guides to good hygiene practice should include appropriate information on hazards that may arise in primary production and associated operations and actions to control hazards, including relevant measures set out in Community and national legislation or national and Community programmes. Examples of such hazards and measures may include:	2. Smernice za dobro higiensko prakso morajo vključevati ustrezne informacije o tveganjih, ki lahko nastanejo v primarni proizvodnji in z njo povezanih delovnih postopkih, ter postopke za nadzor tveganj, tudi ustrezne ukrepe, določene v nacionalni zakonodaji in zakonodaji Skupnosti ali v nacionalnih programih in programih Skupnosti. Med primere takih tveganj in ukrepov lahko sodijo:	Is "hazards" translated as "risk" ("tveganj") in "control hazards" and "such hazards"?
SL	hazard	17	5. Steam used directly in contact with food is not to contain any substance that presents a hazard to health or is likely to contaminate the food.	5. Para, ki prihaja v neposreden stik z živili, ne sme vsebovati snovi, ki predstavljajo tveganje za zdravje ali bi lahko kontaminirale živilo.	Is "hazard" translated as "risk" ("tveganja") in "hazard to health" and "hazard to health"?
Language	Term	Location (doc page)	English	Translation	Observation	EU-FORA fellow reply
SL	risk	-	-	-	-	-
New version
Language	Term	Location (doc page)	English	Translation	Observation	EU-FORA fellow reply
SL	hazard	3	(a) ‘food hygiene’, hereinafter called ‘hygiene’, means the measures and conditions necessary to control hazards and to ensure fitness for human consumption of a foodstuff taking into account its intended use;	(a) „higiena živil“, v nadaljnjem besedilo „higiena“, pomeni ukrepe in pogoje, potrebne za nadzor tveganj in za zagotovitev ustreznosti živil za prehrano ljudi, ob upoštevanju njihove predvidene uporabe;	Is "hazard" translated as "risk" ("tveganj")?
SL	hazard	3	(f) ‘contamination’ means the presence or introduction of a hazard;	(f) „kontaminacija“ pomeni prisotnost ali nastanek tveganja;	Is "hazard" translated as "risk" ("tveganj")?
SL	hazard	3	(l) ‘hermetically sealed container’ means a container that is designed and intended to be secure against the entry of hazards;	(l) „hermetično zaprta posoda“ pomeni posodo, ki je oblikovana tako, da je varna pred tveganji in je temu namenjena;	Is "hazards" translated as "risk" ("tveganj")?
SL	hazard	5	Hazard analysis and critical control points	Analiza tveganj in kritičnih kontrolnih točk	Is "hazards" translated as "risk" ("tveganj")?
SL	hazard	5	(a) identifying any hazards that must be prevented, eliminated or reduced to acceptable levels;	(a) ugotavljanje vseh tveganj, ki jih je treba preprečiti, odpraviti ali znižati na sprejemljive ravni;	Is "hazards" translated as "risk" ("tveganj")?
SL	hazard	5	(b) identifying the critical control points at the step or steps at which control is essential to prevent or eliminate a hazard or to reduce it to acceptable levels;	(b) ugotavljanje kritičnih kontrolnih točk v fazi ali fazah, na katerih je nadzor nujen za preprečitev ali odpravo tveganja ali za njegovo znižanje na sprejemljivo raven:	Is "hazard" translated as "risk" ("tveganja")?
SL	hazard	5	(c) establishing critical limits at critical control points which separate acceptability from unacceptability for the prevention, elimination or reduction of identified hazards;	(c) določitev kritičnih mej na kritičnih kontrolnih točkah, ki ločijo dopustno od nedopustnega pri preprečevanju, odpravi ali znižanju ugotovljenih tveganj;	Is "hazards" translated as "risk" ("tveganj")?
SL	hazard	11	(c) explain the reasons for the adaptation, including, where relevant, by providing a summary of the hazard analysis carried out and any measures to be taken to ensure that the adaptation will not compromise the objectives of this Regulation;	(c) razlago razlogov za prilagoditev, kadar je to ustrezno, tudi s povzetkom opravljene analize tveganj in vseh ukrepov, ki jih je treba sprejeti, da prilagoditev ne bo ogrozila ciljev te uredbe; in	Is "hazard" translated as "risk" ("tveganja")?
SL	hazard	14	3. Notwithstanding the general duty laid down in paragraph 2, food business operators are to comply with appropriate Community and national legislative provisions relating to the control of hazards in primary production and associated operations, including:	3. Ne glede na splošno obveznost, določeno v odstavku 2, morajo nosilci živilske dejavnosti spoštovati ustrezne določbe zakonodaje Skupnosti in nacionalne zakonodaje v zvezi z nadzorom tveganj v primarni proizvodnji in povezanih delovnih postopkih, vključno z:	Is "hazards" translated as "risk" ("tveganj")?
SL	hazard	15	7. Food business operators are to keep and retain records relating to measures put in place to control hazards in an appropriate manner and for an appropriate period, commensurate with the nature and size of the food business. Food business operators are to make relevant information contained in these records available to the competent authority and receiving food business operators on request.	7. Nosilci živilske dejavnosti morajo na primeren način in za ustrezno obdobje voditi in hraniti evidenco, ki se nanaša na ukrepe, sprejete za nadzor tveganj, ki je sorazmerna vrsti in velikosti živilske dejavnosti. Na zahtevo morajo nosilci živilske dejavnosti dati ustrezne informacije iz teh evidenc na voljo pristojnemu organu in nosilcu živilske dejavnosti, ki prevzema hrano.	Is "hazards" translated as "risk" ("tveganj")?
SL	hazard	16	1. National and Community guides referred to in Articles 7 to 9 of this Regulation should contain guidance on good hygiene practice for the control of hazards in primary production and associated operations.	1. Nacionalne smernice in smernice Skupnosti iz členov od 7 do 9 te uredbe morajo vključevati smernice za dobro higiensko prakso za nadzor tveganj v primarni proizvodnji in z njo povezanih delovnih postopkih.	Is "hazards" translated as "risk" ("tveganj")?
SL	hazard	16	2. Guides to good hygiene practice should include appropriate information on hazards that may arise in primary production and associated operations and actions to control hazards, including relevant measures set out in Community and national legislation or national and Community programmes. Examples of such hazards and measures may include:	2. Smernice za dobro higiensko prakso morajo vključevati ustrezne informacije o tveganjih, ki lahko nastanejo v primarni proizvodnji in z njo povezanih delovnih postopkih, ter postopke za nadzor tveganj, tudi ustrezne ukrepe, določene v nacionalni zakonodaji in zakonodaji Skupnosti ali v nacionalnih programih in programih Skupnosti. Med primere takih tveganj in ukrepov lahko sodijo:	Is "hazards" translated as "risk" ("tveganj") in "control hazards"?
SL	hazard	22	5. Steam used directly in contact with food is not to contain any substance that presents a hazard to health or is likely to contaminate the food.	5. Para, ki prihaja v neposreden stik z živili, ne sme vsebovati snovi, ki predstavljajo tveganje za zdravje ali bi lahko kontaminirale živilo.	Is "hazard" translated as "risk" ("tveganja") in "hazard to health"?
Language	Term	Location (doc page)	English	Translation	Observation	EU-FORA fellow reply
SL	risk	-	-	-	-	-

## Sheet: REG 853-2004
Old version
Language	Term	Location (doc page)	English	Translation	Observation	EU-FORA fellow reply
SL	hazard	2	(2) Certain foodstuffs may present specific hazards to human health, requiring the setting of specific hygiene rules. This is particularly the case for food of animal origin, in which microbiological and chemical hazards have frequently been reported.	(2) Nekatera ivila lahko predstavljajo posebno nevarnost za zdravje ljudi, zaradi Łesar je treba doloŁiti posebna higienska pravila. To _x0001_e zlasti velja za ivila ivalskega izvora, v katerih so pogosto ugotovljena mikrobiolo_x0001_ka in kemijska tveganja.	Is "hazards" translated as "risks" in "tveganja"?
SL	hazard	2	(7) The requirement in Regulation (EC) No /2004 ∗ whereby food business operators carrying out any stage of production, processing and distribution of food after primary production and associated operations must put in place, implement and maintain procedures based on hazard analysis and critical control point (HACCP) principles also permits simplification	(7) Poenostavitev dovoljuje tudi zahteva v Uredbi (ES) _x0001_t. 852/2004, v skladu s katero morajo nosilci ivilske dejavnosti, ki po primarni pridelavi in pridrueni dejavnosti izvajajo katero koli stopnjo proizvodnje, predelave in distribucije hrane, uvesti, izvajati in vzdrevati postopke na podlagi naŁel analize tveganja in kritiŁnih kontrolnih toŁk (HACCP).	Is "hazard" translated as "risk" in "tveganja"?
SL	hazard	2	(22) In order to ensure proper inspection of hunted wild game placed on the Community market, bodies of hunted animals and their viscera should be presented for official post-mortem inspection at a game-handling establishment. However, to preserve certain hunting traditions without prejudicing food safety, it is appropriate to provide for training for hunters who place wild game on the market for…	(22) Za zagotovitev pravilnega veterinarskega pregleda uplenjene divjadi, dane v promet na trgu Skupnosti, je treba na trupih uplenjenih ivali in njihovih notranjih organih opraviti uradni post mortem pregled v obratu za obdelavo divjadi. Zaradi ohranjanja nekaterih obiŁajev lova je primerno, da se brez poseganja v varnost ivil predvidi usposabljanje za lovce, ki dajejo na trg divjad za prehrano …	Is "hazard" translated as "risk" in "tveganja" in "no anormalities and hazards"?
SL	hazard	8	(c) explain the reasons for the adaptation, including, where relevant, by providing a summary of the hazard analysis carried out and any measures to be taken to ensure that the adaptation will not compromise the objectives of this Regulation; and	(c) poda razloge za prilagoditev, vkljuŁno z zagotovitvijo povzetka izvedene analize tveganj in vseh ukrepov, ki jih je treba sprejeti za zagotovitev, da prilagoditev ne bo ogrozila ciljev te uredbe;	Is "hazard" translated as "risk" in "tveganj" in "hazard analysis"?
SL	hazard	46	(a) epidemiological data are available indicating that the fishing grounds of origin do not present a health hazard with regard to the presence of parasites; and	(a) so na voljo epidemiološki podatki, ki dokazujejo, da ribolovna območja izvora ne ogrožajo zdravja ljudi glede prisotnosti parazitov;	Is "hazard" translated as "endanger" ("ogrožajo")? Should it be a differentiation between hazard and endanger?
SL	hazard	54	5. After breaking, each particle of the egg product must undergo processing as quickly as possible to eliminate microbiological hazards or to reduce them to an acceptable level. A batch that has been insufficiently processed may immediately undergo processing again in the same establishment, if this processing renders it fit for human consumption. When a batch is found to be unfit for human consu…	5. Po tretju je treba vse dele jajčnega proizvoda čim prej predelati, da se odpravijo mikrobiološka tveganja ali jih zmanjšati do sprejemljive ravni. Serija, ki je bila nezadostno predelana, se lahko ponovno takoj predela v istem objektu, če ta predelava omogoča, da je serija primerna za prehrano ljudi. Če se ugotovi, da serija ni primerna za prehrano ljudi, mora biti denaturirana tako, da se ne …	Is "hazard" translated as "risk" in "tveganja" in "microbiological hazards"?
Language	Term	Location (doc page)	English	Translation	Observation	EU-FORA fellow reply
SL	risk	3	(20) The definition of mechanically separated meat (MSM) should be a generic one covering all methods of mechanical separation. Rapid technological developments in this area mean that a flexible definition is appropriate. The technical requirements for MSM should differ, however, depending on a risk assessment of the product resulting from different methods.	(20) Opredelitev mehansko izko_x0001_Łenega mesa (MIM) bi morala biti splo_x0001_na in zajeti vse metode mehanskega izko_x0001_Łevanja. Hiter tehnolo_x0001_ki razvoj na tem podroŁju pomeni, da je primerna prona opredelitev. TehniŁne zahteve za MIM pa bi se morale razlikovati glede na oceno nevarnosti za proizvod, ki izhaja iz razliŁnih metod.	Is "risk" translated as "hazard" ("nevarnosti") in "risk assessment"?
SL	hazard	2	(22) In order to ensure proper inspection of hunted wild game placed on the Community market, bodies of hunted animals and their viscera should be presented for official post-mortem inspection at a game-handling establishment. However, to preserve certain hunting traditions without prejudicing food safety, it is appropriate to provide for training for hunters who place wild game on the market for…	(22) Za zagotovitev pravilnega veterinarskega pregleda uplenjene divjadi, dane v promet na trgu Skupnosti, je treba na trupih uplenjenih ivali in njihovih notranjih organih opraviti uradni post mortem pregled v obratu za obdelavo divjadi. Zaradi ohranjanja nekaterih obiŁajev lova je primerno, da se brez poseganja v varnost ivil predvidi usposabljanje za lovce, ki dajejo na trg divjad za prehrano …	Is "risk" translated as "hazard" ("nevarnosti") in "anomalies or hazards" and "specific risks"?
SL	risk	22	9. When not skinned, porcine animals must have their bristles removed immediately. The risk of contamination of the meat with scalding water must be minimised. Only approved additives may be used for this operation. Porcine animals must be thoroughly rinsed afterwards with potable water.	9. Kadar niso odrti, je treba prašičem takoj odstraniti ščetine. Nevarnost za kontaminacijo mesa z vodo za oparjenje je treba zmanjšati na najmanjšo mero. Za to operacijo se lahko uporabljajo le odobreni aditivi. Prašiče je zatem treba temeljito sprati s pitno vodo.	Is "risk" translated as "hazard" ("nevarnost") in "risk of contamination"?
SL	risk	22	(a) the animals cannot be transported, to avoid any risk for the handler or to protect the welfare of the animals;	(a) se živali ne morejo prevažati, da ne bi bilo nevarnosti za osebo, ki z živalmi ravna, ali zaradi varovanja dobrega počutja živali;	Is "risk" translated as "hazard" ("nevarnosti") in "any risk"?
SL	risk	30	2. The trained person must carry out an examination of the body, and of any viscera removed, to identify any characteristics that may indicate that the meat presents a health risk. The examination must take place as soon as possible after killing.	2. Usposobljena oseba mora opraviti pregled telesa in odstranjenih notranjih organov, da lahko ugotovi vse znake, po katerih bi lahko lahko sklepala, da pomeni meso nevarnost za zdravje. Pregled se mora opraviti čim prej po uplenitvi.	Is "risk" translated as "hazard" ("nevarnost") in "health risk"?
SL	risk	31	1. The trained person must carry out an examination to identify any characteristics that may indicate that the meat presents a health risk. The examination must take place as soon as possible after killing.	1. Usposobljena oseba mora opraviti pregled, da ugotovi vse lastnosti, po katerih lahko sklepa, da predstavlja meso nevarnost za zdravje. Pregled se mora opraviti čim prej po uplenitvi.	Is "risk" translated as "hazard" ("nevarnost") in "health risk"?
SL	risk	31	1. Food business operators may use only those areas that the competent authority has approved for relaying live bivalve molluscs. Buoys, poles or other fixed means must clearly identify the boundaries of the sites. There must be a minimum distance between relaying areas, and also between relaying areas and production areas, so as to minimise any risk of the spread of contamination.	1. Nosilci živilske dejavnosti morajo uporabljati samo tista območja, ki jih je za ponovno nasaditev živih školjk odobril pristojni organ. Boje, drogovi in druga pritrjena sredstva morajo jasno označevati meje območij. Med območji za ponovno nasaditev ter med območji za ponovno nasaditev in proizvodnimi območji mora biti minimalna oddaljenost, tako da se zmanjša nevarnost širitve onesnaženja.	Is "risk" translated as "hazard" ("nevarnost") in "any risk"?
SL	risk	47	(b) is stored in such a manner that it is not exposed to a risk of contamination;	b) se skladišči na tak način, da ni izpostavljen nevarnostim kontaminacije;	Is "risk" translated as "hazard" ("nevarnostim") in "risk of contamination"?
SL	risk	50	1. Milking equipment, and premises where milk is stored, handled or cooled must be located and constructed so as to limit the risk of contamination of milk.	1. Molzna oprema in prostori, kjer se mleko skladišči, obdeluje ali ohlajuje, mora biti locirana in izdelana tako, da se omeji nevarnost kontaminacije mleka.	Is "risk" translated as "hazard" ("nevarnost") in "risk of contamination"?
New version
Language	Term	Location (doc page)	English	Translation	Observation	EU-FORA fellow reply
SK	hazard	53	(d) derived from fish farming, cultured from embryos and have been fed exclusively on a diet that cannot contain viable parasites that present a health hazard, and one of the following requirements is complied with:	(i) so na voljo epidemiološki podatki, ki dokazujejo, da ribolovna območja izvora ne ogrožajo zdravja ljudi z vidika prisotnosti parazitov, ter	Is "hazard" translated as "threat" ("ogrožajo") in "health hazard"?
SK	hazard	53	(ii) the food business operator verifies through procedures, approved by the competent authority, that the fishery products do not represent a health hazard with regard to the presence of viable parasites.	(d) iz ribogojnic, pridobljenih iz zarodkov, hranjenih izključno s krmili, ki ne morejo vsebovati za življenje sposobnih parazitov, ki ogrožajo zdravje, pri tem pa je izpolnjena ena od naslednjih zahtev:	Is "hazard" translated as "threat" ("ogrožajo") in "health hazard"?
			(ii) the food business operator verifies through procedures, approved by the competent authority, that the fishery products do not represent a health hazard with regard to the presence of viable parasites.	(ii) nosilec živilske dejavnosti s pomočjo postopkov, ki jih je odobril pristojni organ, preveri, da ribiški proizvodi ne ogrožajo zdravja z vidika prisotnosti za življenje sposobnih parazitov.	Is "hazard" translated as "threat" ("ogrožajo") in "health hazard"?
SK	hazard	53	(b) Before placing on the market fishery products referred to in points 3(c) and (d) which have not undergone the freezing treatment or which are not intended to undergo before consumption a treatment that kills viable parasites that present a health hazard, a food business operator must ensure that the fishery products originate from a fishing ground or fish farming which complies with the speci…	(b) Preden se na trg dajo ribiški izdelki iz točke 3(c) in (d), ki niso bili obdelani z zamrzovanjem ali za katere pred zaužitjem ni predvidena obdelava za usmrtitev za življenje sposobnih parazitov, ki ogrožajo zdravje, mora nosilec živilske dejavnosti zagotoviti, da ribiški proizvodi izvirajo iz ribolovnega območja ali ribogojnice, ki je v skladu s posebnimi pogoji iz ene od navedenih točk. To …	Is "hazard" translated as "threat" ("ogrožajo") in "health hazard"?
SK	hazard	77	5. After breaking, each particle of the liquid egg must undergo processing as quickly as possible to eliminate microbiological hazards or to reduce them to an acceptable level. A batch that has been insufficiently processed may immediately undergo processing again in the same establishment if this processing renders it fit for human consumption. Where a batch is found to be unfit for human consum…	5. Po tretju je treba vse dele jajčnega melanža čim prej predelati, da se odpravijo mikrobiološka tveganja ali se zmanjšajo do sprejemljive ravni. Serija, ki je bila nezadostno predelana, se lahko takoj znova predela v istem obratu, če ta predelava omogoči, da je serija primerna za prehrano ljudi. Če se ugotovi, da serija ni primerna za prehrano ljudi, mora biti denaturirana, tako da se ne more u…	Is "hazard" translated as "risk" ("tveganja") in "microbiological hazards"?
Language	Term	Location (doc page)	English	Translation	Observation	EU-FORA fellow reply
SL	risk	28	9. When not skinned, porcine animals must have their bristles removed immediately. The risk of contamination of the meat with scalding water must be minimised. Only approved additives may be used for this operation. Porcine animals must be thoroughly rinsed afterwards with potable water.	9. Kadar niso odrti, je treba prašičem takoj odstraniti ščetine. Nevarnost za kontaminacijo mesa z vodo za oparjenje je treba zmanjšati na najmanjšo mero. Za to operacijo se lahko uporabljajo le odobreni aditivi. Prašiče je zatem treba temeljito sprati s pitno vodo	Is "risk" translated as "hazard" ("nevarnost") in "risk of contamination"?
SL	risk	40	(a) the animals cannot be transported, to avoid any risk for the handler or to protect the welfare of the animals;	(a) se živali ne morejo prevažati, da ne bi bilo nevarnosti za osebo, ki z živalmi ravna, ali zaradi varovanja dobrega počutja živali;	Is "risk" translated as "hazard" ("nevarnosti") in "avoid any risk"?
SL	risk	42	2. The trained person must carry out an examination of the body, and of any viscera removed, to identify any characteristics that may indicate that the meat presents a health risk. The examination must take place as soon as possible after killing.	2. Usposobljena oseba mora opraviti pregled telesa in odstranjenih notranjih organov, da lahko ugotovi vse znake, po katerih bi lahko lahko sklepala, da pomeni meso nevarnost za zdravje. Pregled se mora opraviti čim prej po uplenitvi.	Is "risk" translated as "hazard" ("nevarnost") in "health risk"?
SL	risk	44	1. The trained person must carry out an examination to identify any characteristics that may indicate that the meat presents a health risk. The examination must take place as soon as possible after killing.	1. Usposobljena oseba mora opraviti pregled, da ugotovi vse lastnosti, po katerih lahko sklepa, da predstavlja meso nevarnost za zdravje. Pregled se mora opraviti čim prej po uplenitvi.	Is "risk" translated as "hazard" ("nevarnost") in "health risk"?
SL	risk	53	1. Food business operators may use only those areas that the competent authority has approved for relaying live bivalve molluscs. Buoys, poles or other fixed means must clearly identify the boundaries of the sites. There must be a minimum distance between relaying areas, and also between relaying areas and production areas, so as to minimise any risk of the spread of contamination.	1. Nosilci živilske dejavnosti morajo uporabljati samo tista območja, ki jih je za ponovno nasaditev živih školjk odobril pristojni organ. Boje, drogovi in druga pritrjena sredstva morajo jasno označevati meje območij. Med območji za ponovno nasaditev ter med območji za ponovno nasaditev in proizvodnimi območji mora biti minimalna oddaljenost, tako da se zmanjša nevarnost širitve onesnaženja.	Is "risk" translated as "hazard" ("nevarnost") in "risk of contamination"?
SL	risk	65	must ensure that the raw material or finished product undergo a freezing treatment in order to kill viable parasites that may be a risk to the health of the consumer.	morajo zagotoviti, da se surovina ali končni proizvod obdela z zamrzovanjem, da se usmrti za življenje sposobne parazite, ki bi lahko ogrožali zdravje potrošnika.	Is the word "risk" missing in the Slovak version? Is the translation acceptable?
SL	risk	68	(b) is stored in such a manner that it is not exposed to a risk of contamination;	(b) se skladišči na tak način, da ni izpostavljen nevarnostim kontaminacije;	Is "risk" translated as "hazard" ("nevarnost") in "risk of contamination"?
SL	risk	71	1. Milking equipment and premises where milk and colostrum are stored, handled or cooled must be located and constructed so as to limit the risk of contamination of milk and colostrum.	1. Molzna oprema in prostori, kjer se mleko in kolostrum skladiščita, obdelujeta ali ohlajujeta, morajo biti locirani in izdelani tako, da se omeji nevarnost kontaminacije mleka in kolostruma.	Is "risk" translated as "hazard" ("nevarnost") in "risk of contamination"?
SL	risk	82	(a) all ruminant bone material derived from animals born, reared or slaughtered in countries or regions with a controlled or undetermined BSE risk in accordance with Community legislation is subjected to a process which ensures that all bone material is finely crushed and degreased with hot water and treated with dilute hydrochloric acid (at minimum concentration of 4 % and pH < 1,5) over a perio…	(a) se za ves kostni material prežvekovalcev, rojenih, vzrejenih ali zaklanih v državah ali regijah, ki so razvrščene kot države z nadzorovano ali nedoločeno stopnjo BSE v skladu z zakonodajo Skupnosti, uporabi postopek predelave, ki zagotavlja, da se ves kostni material drobno zmelje in razmasti z vročo vodo in obdela z razredčeno solno kislino (pri najmanjši koncentraciji 4 % in pH < 1,5) za na…	Is the word "risk" missing in the Slovak version? Is the translation acceptable?

## Sheet: REG 625-2017
Old version
Language	Term	Location (doc page)	English	Translation	Observation	EU-FORA fellow reply
SL	hazard	2	(6) Transmissible animal diseases, including by micro-organisms that have developed resistance to antimicrobials, may have a significant impact on public health, food and feed safety, and animal health and welfare. In order to ensure high standards of animal and public health in the Union, rules on animal health measures and on feed and food safety are laid down at Union level. Compliance with th…	(6) Prenosljive bolezni živali, tudi tiste, ki se prenašajo z mikroorganizmi, ki so razvili odpornost na protimikrobna zdravila, lahko pomembno vplivajo na javno zdravje, varnost živil in krme ter zdravje in dobrobit živali. Da bi zagotovili visoke standarde zdravja živali in javnega zdravja v Uniji, se pravila o ukrepih na področju zdravja živali ter o varnosti živil in krme določajo na ravni Un…	Is "threats" translated as "hazard" ("nevarnosti")? Should it be a differentiation between threats and hazard?
Language	Term	Location (doc page)	English	Translation	Observation	EU-FORA fellow reply
SL	risk	-	-	-	-	-
New version
Language	Term	Location (doc page)	English	Translation	Observation	EU-FORA fellow reply
SL	hazard	18	(d) an assessment of procedures on good manufacturing practices, good hygiene practices, good farming practices, and of procedures based on the principles of hazard analysis critical control points (HACCP);	(d) oceno postopkov dobre proizvodne prakse, dobre higienske prakse, dobre kmetijske prakse ter postopkov, ki temeljijo na načelih analize tveganj in kritičnih kontrolnih točk (HACCP);	Is "hazard" translated as "risk" ("tveganj") in "hazard analysis"?
Language	Term	Location (doc page)	English	Translation	Observation	EU-FORA fellow reply
SL	risk	-	-	-	-	-

## Sheet: REG 1381-2019
Single version
Language	Term	Location (doc page)	English	Translation	Observation	EU-FORA fellow reply
SL	hazard	-	-	-	-	-
Language	Term	Location (doc page)	English	Translation	Observation	EU-FORA fellow reply
SL	risk	-	-	-	-	-
