# Supplementary material for: Food Risk Analysis: Towards a Better Understanding of „Hazard” and „Risk” in EU food legislation
Source: Preprints.org preprint supplement (doi:10.20944/preprints202306.1556.v1), 2023-06-21
Supplement: Supplementary file 27 [file SV.xlsx]

## Sheet: REG 178-2002
Old version
Language	Term	Location (doc page)	English	Translation	Observation	EFSA Focal Point
SV	hazard	-	-	-	-
Language	Term	Location (doc page)	English	Translation	Observation	EFSA Focal Point
SV	risk	3	(26) Some Member States have adopted horizontal legislation on food safety imposing, in particular, a general obligation on economic operators to market only food that is safe. However, these Member States apply different basic criteria for establishing whether a food is safe. Given these different approaches, and in the absence of horizontal legislation in other Member States, barriers to trade …	(26) En del medlemsstater har antagit en övergripande lagstiftning om livsmedelssäkerhet som särskilt innehåller det allmänna kravet att ekonomiska aktörer endast får marknadsföra livsmedel som är säkra. Dessa medlemsstater tillämpar emellertid olika grundläggande kriterier för att fastställa om ett livsmedel är säkert. Mot bakgrund av dessa olika synsätt och eftersom det saknas övergripande lags…	Is the word expressing "risk" ("riskera") used in the translation? Is the translation acceptable?
SV	risk	3	(30) A food business operator is best placed to devise a safe system for supplying food and ensuring that the food it supplies is safe; thus, it should have primary legal responsibility for ensuring food safety. Although this principle exists in some Member States and areas of food law, in other areas this is either not explicit or else responsibility is assumed by the competent authorities of th…	(30) En livsmedelsföretagare är mest lämpad att utforma ett säkert system för att tillhandahålla livsmedel och garantera att de livsmedel som tillhandahålls är säkra. Företagaren bör därför ha det primära juridiska ansvaret för att garantera livsmedelssäkerhet. Även om denna princip tillämpas i en del medlemsstater och på vissa områden av livsmedelslagstiftningen, är detta inte klart inom andra o…	Is the word expressing "risk" ("riskera") used in the translation? Is the translation acceptable?
SV	risk	4	(44) The Authority should cooperate closely with competent bodies in the Member States if it is to operate effectively. An Advisory Forum should be created in order to advise the Executive Director, to constitute a mechanism of exchange of information, and to ensure close cooperation in particular with regard to the networking system. Cooperation and appropriate exchange of information should als…	44) Myndigheten bör ha ett nära samarbete med behöriga organ i medlemsstaterna om den skall kunna fungera effektivt. En rådgivande grupp bör inrättas för att biträda den verkställande direktören, utgöra en mekanism för informationsutbyte och säkerställa ett nära samarbete i synnerhet med avseende på nätverkssystemet. Samarbete och lämpligt informationsutbyte bör även begränsa risken för skiljakti…	Is the word expressing "risk" ("risken") used in the translation? Is the translation acceptable?
New version
Language	Term	Location (doc page)	English	Translation	Observation	EFSA Focal Point
SV	hazard	-	-	-	-	-
Language	Term	Location (doc page)	English	Translation	Observation	EFSA Focal Point
SV	risk	-	-	-	-	-

## Sheet: REG 852-2004
Old version
Language	Term	Location (doc page)	English	Translation	Observation	EFSA Focal Point
SV	hazard	-	-	-	-	-
Language	Term	Location (doc page)	English	Translation	Observation	EFSA Focal Point
SV	risk	51	5. Raw materials, ingredients, intermediate products and finished products likely to support the reproduction of pathogenic micro-organisms or the formation of toxins are not to be kept at temperatures that might result in a risk to health. The cold chain is not to be interrupted. However, limited periods outside temperature control are permitted, to accommodate the practicalities of handling dur…	5. Råvaror, ingredienser, halvfabrikat och färdiga produkter i vilka patogena mikroorganismer kan förökas eller gifter kan bildas får inte förvaras vid temperaturer som kan medföra att hälsofara uppstår. Kylkedjan får inte brytas. Begränsade perioder utan temperaturkontroller skall dock tillåtas av praktiska skäl vid beredning, transport, lagring, utbjudande till försäljning eller servering av li…	Is "risk" translated as "hazard" ("hälsofara") in "risk to health"?
New version
Language	Term	Location (doc page)	English	Translation	Observation	EFSA Focal Point
SV	hazard	24	(c) awareness of food safety hazards and of the importance of food safety and hygiene by all employees in the business;	c) Medvetenhet om risker för livsmedelssäkerheten och om vikten av livsmedelssäkerhet och livsmedelshygien hos alla anställda i företaget.	Is "hazards" translated as "risks" ("risker") in "food safety hazards"?
Language	Term	Location (doc page)	English	Translation	Observation	EFSA Focal Point
SV	risk	23	5. Raw materials, ingredients, intermediate products and finished products likely to support the reproduction of pathogenic micro-organisms or the formation of toxins are not to be kept at temperatures that might result in a risk to health. The cold chain is not to be interrupted. However, limited periods outside temperature control are permitted, to accommodate the practicalities of handling dur…	5. Råvaror, ingredienser, halvfabrikat och färdiga produkter i vilka patogena mikroorganismer kan förökas eller gifter kan bildas får inte förvaras vid temperaturer som kan medföra att hälsofara uppstår. Kylkedjan får inte brytas. Begränsade perioder utan temperaturkontroller skall dock tillåtas av praktiska skäl vid beredning, transport, lagring, utbjudande till försäljning eller servering av li…	Is "risk" translated as "hazard" ("hälsofara") as "risk to health"?

## Sheet: REG 853-2004
Old version
Language	Term	Location (doc page)	English	Translation	Observation	EFSA Focal Point
SV	hazard	28	8) to specify criteria for determining when epidemiological data indicate that a fishing ground does not present a health hazard with regard to the presence of parasites and, consequently, for determining when the competent authority may authorise food business operators not to freeze fishery products in accordance with Annex III, Section VIII, Chapter III, Part D;	8. för att ange kriterier för fastställande av att en fångstplats enligt epidemiologiska data inte utgör någon hälsorisk med avseende på förekomsten av parasiter och för fastställande av när den behöriga myndigheten följaktligen får ge livsmedelsföretagare tillstånd att inte behöva frysa fiskeriprodukter i enlighet med bilaga III, avsnitt VIII, kapitel III, del D,	Is "hazard" translated as "risk" ("hälsorisk") in "health risk"?
SV	hazard	108	6. Where fish are headed and/or gutted on board, such operations must be carried out hygienically as soon as possible after capture, and the products must be washed immediately and thoroughly with potable water or clean water. In that event, the viscera and parts that may constitute a danger to public health must be removed as soon as possible and kept apart from products intended for human consu…	6. Eventuell huvudskärning och/eller rensning, skall utföras på ett hygieniskt sätt snarast möjligt efter fångsten, och produkten skall omedelbart sköljas grundligt med dricksvatten eller rent vatten. Inälvorna och delar som kan utgöra en risk för människors hälsa skall avlägsnas snarast möjligt och hållas åtskilda från produkter som är avsedda att användas som livsmedel. Lever, rom och mjölke av…	Is "danger" translated as "risk" ("riskt")? Should it be a differentiation between danger and threat?
Language	Term	Location (doc page)	English	Translation	Observation	EFSA Focal Point
SV	risk	143	(b) The storage rooms must be kept in a satisfactory state of cleanliness and repair, so that they do not constitute a source of contamination for the raw materials.	b) Lagerlokalerna skall hållas rena och i gott skick så att råvarorna inte riskeras att kontamineras	Is the word "risk" ("riskeras") used for expressing "do not constitute a source of contamination" in the Swedish version? Is the translation acceptable?
SV	risk	148	(b) The storage rooms must be kept in a satisfactory state of cleanliness and repair, so that they do not constitute a source of contamination for the raw materials.	b) Lagerlokalerna skall hållas rena och i gott skick så att råvarorna inte riskeras att kontamineras.	Is the word "risk" ("riskeras") used for expressing "do not constitute a source of contamination" in the Swedish version? Is the translation acceptable?
New version
Language	Term	Location (doc page)	English	Translation	Observation	EFSA Focal Point
SV	hazard	11	(i) the criteria for determining when epidemiological data indicate that a fishing ground does not present a health hazard with regard to the presence of parasites and, consequently, for determining when the competent authority may authorise food business operators not to freeze fishery products in accordance with Annex III, Section VIII, Chapter III, Part D;	i) kriterier för fastställande av när en fångstplats enligt epidemiologiska data inte utgör någon hälsorisk med avseende på förekomsten av parasiter och följaktligen för fastställande av när den behöriga myndigheten får ge livsmedelsföretagare tillstånd att inte behöva frysa fiskeriprodukter i enlighet med bilaga III, avsnitt VIII, kapitel III, del D,	Is "hazard" is translated as "risk" ("hälsorisk") in "health hazard"?
SV	hazard	23	5. Food business operators deciding to accept animals onto the slaughterhouse premises after evaluating the relevant food chain information must make it available to the official veterinarian without delay and, except in the circumstances mentioned in point 7, no less than 24 hours before the arrival of the animal or lot. The food business operator must notify the official veterinarian of any inf…	5. Livsmedelsföretagare som beslutar att ta emot djur på slakteriområdet efter att ha utvärderat den relevanta informationen från livsmedelskedjan, skall göra informationen tillgänglig för den officiella veterinären utan dröjsmål och, utom under de förhållanden som nämns i punkt 7, minst 24 timmar innan djuret eller djuren anländer. Livsmedelsföretagaren måste underrätta den officiella veterinäre…	Is the word "hazard" ("hälsofara") used for expressing "health concern" in the Swedish version? Is the translation acceptable?
Language	Term	Location (doc page)	English	Translation	Observation	EFSA Focal Point
SV	risk	82	(b) The storage rooms must be kept in a satisfactory state of cleanliness and repair, so that they do not constitute a source of contamination for the raw materials.	b) Lagerlokalerna skall hållas rena och i gott skick så att råvarorna inte riskeras att kontamineras.	Is the word "risk" ("riskeraso") used for expressing "do not constitute a source of contamination" in the Swedish version? Is the translation acceptable?
SV	risk	85	(b) The storage rooms must be kept in a satisfactory state of cleanliness and repair, so that they do not constitute a source of contamination for the raw materials.	b) Lagerlokalerna skall hållas rena och i gott skick så att råvarorna inte riskeras att kontamineras.	Is the word "risk" ("riskeraso") used for expressing "do not constitute a source of contamination" in the Swedish version? Is the translation acceptable?

## Sheet: REG 625-2017
Old version
Language	Term	Location (doc page)	English	Translation	Observation	EFSA Focal Point
SV	hazard	-	-	-	-	-
Language	Term	Location (doc page)	English	Translation	Observation	EFSA Focal Point
SV	risk	-	-	-	-	-
New version
Language	Term	Location (doc page)	English	Translation	Observation	EFSA Focal Point
SV	hazard	-	-	-	-	-
Language	Term	Location (doc page)	English	Translation	Observation	EFSA Focal Point
SV	risk	-	-	-	-	-

## Sheet: REG 1381-2019
Single version
Language	Term	Location (doc page)	English	Translation	Observation	EFSA Focal Point
SV	hazard	-	-	-	-	-
Language	Term	Location (doc page)	English	Translation	Observation	EFSA Focal Point
SV	risk	-	-	-	-	-
