# Supplementary material for: Food Risk Analysis: Towards a Better Understanding of „Hazard” and „Risk” in EU food legislation
Source: Preprints.org preprint supplement (doi:10.20944/preprints202306.1556.v1), 2023-06-21
Supplement: Supplementary file 28 [file Supplementary Material 4.xlsx]

## Sheet: BG
Regulation	Version	Language	Term	PDF EN Page	PDF EN paragraph	PDF EN article	Authors	Expert 1
178	O	BG	RE-H	5	59	before chapter I	3	1
178	O	BG	R-H	2	15	before chapter I	5	5
178	O	BG	R-H	2	17	before chapter I	5	5
178	O	BG	R-H	2	22	before chapter I	5	1
625	O	BG	R-H	5	31	I (Legislative Acts)	5	1
625	O	BG	R-H	14	85	85	5	1
852	O	BG	H-R	2	10	before Chapter 1	5	1
852	O	BG	U-R	2	17	before Chapter 1	3	1
852	O	BG	ADDR	5	16	before Chapter 1	3	4
853	O	BG	H-R	3	7	before Chapter 1	5	1
853	O	BG	H-R	43	title	SECTION II: OBJECTIVES OF HACCP-BASED PROCEDURES	5	1
853	O	BG	H-R	136	4	SECTION XI: FROGS' LEGS AND SNAILS .	5	5
853	O	BG	H-R	137	6	SECTION XI: FROGS' LEGS AND SNAILS	5	5
853	N	BG	H-R	21	title	SECTION II: OBJECTIVES OF HACCP-BASED PROCEDURES	5	1
853	N	BG	H-R	78	4	SECTION XI: FROGS' LEGS AND SNAILS	5	5
853	N	BG	H-R	78	6	SECTION XI: FROGS' LEGS AND SNAILS	5	5

## Sheet: CS
Regulation	Version	Language	Term	PDF EN Page	PDF EN paragraph	PDF EN article	Authors	Expert 1
178	O	CS	U-Z	10	6	Article 14	3	5
178	O	CS	U-Z	11	3	Article 15	3	1
178	O	CS	R-T	5	60	before chapter I	3	1
178	O	CS	CMP-RMP	13	h	Article 23	3	5
178	O	CS	PHH-PHHR	40	3a	Article 50	3	1
178	N	CS	U-Z	11	6	Article 14	3	5
178	N	CS	CMP - RMP	16	h	Article 23	3	5
178	N	CS	PHH - PHHR	40	3a	Article 50	3	1
1381	S	CS	U-Z	3	19	before Article 1	3	5
625	O	CS	H-R	29	d	Article 14	5	5
625	N	CS	H-R	18	d	Article 14	5	5
852	O	CS	H-R	15	title	Article 5	5	5
852	O	CS	H-R	5	2a	Article 5	5	5
852	O	CS	H-R	5	2b	Article 5	5	5
852	O	CS	H-R	6	1c	Article 5	5	5
852	O	CS	H-R	9	5c	Article 13	5	5
852	O	CS	H-R	11	3	ANNEX I. II HYEGIENE PROVISIONS	5	5
852	O	CS	H-R	12	7	ANNEX I. III RECORD KEEPING	5	5
852	O	CS	H-R	17	5	CHAPTER VII. WATER SUPPLY	5	5
852	N	CS	H-R	5	title	Article 5	5	5
852	N	CS	H-R	5	2a	Article 5	5	5
852	N	CS	H-R	5	2b	Article 5	5	5
852	N	CS	H-R	5	1c	Article 5	5	5
852	N	CS	H-R	11	5c	Article 13	5	5
852	N	CS	H-R	14	3	ANNEX I. II HYEGIENE PROVISIONS	5	5
852	N	CS	H-R	15	7	ANNEX I. III RECORD KEEPING	5	5
852	N	CS	H-R	22	5	CHAPTER VII. WATER SUPPLY	5	5
853	O	CS	H-R	2	2	before Chapter 1	5	5
853	O	CS	H-R	3	7	before Chapter 1	5	5
853	O	CS	H-R	8	22	before Chapter 1	5	5
853	O	CS	H-R	26	5c	Article 10	5	5
853	O	CS	H-R	28	8	Article 11	5	5
853	O	CS	H-R	43	1	SECTION II: OBJECTIVES OF HACCP-BASED PROCEDURES	5	5
853	O	CS	H-R	114	2a	D. REQUIREMENTS CONCERNING PARASITES	5	5
853	O	CS	H-R	134	5	III. SPECIAL HYGIENE REQUIREMENTS FOR THE MANUFACTURE OF EGG PRODUCTS	5	5
853	O	CS	H-R	136	4	SECTION XI: FROGS' LEGS AND SNAILS	5	5
853	O	CS	H-R	136	6	SECTION XI: FROGS' LEGS AND SNAILS	5	5
853	O	CS	R-T	73	3a	SECTION III: MEAT OF FARMED GAME	3	5
853	N	CS	H-R	12	5c	Article 10	5	5
853	N	CS	H-R	21	1	SECTION II: OBJECTIVES OF HACCP-BASED PROCEDURES	5	5
853	N	CS	H-R	66	3c(i)	D. REQUIREMENTS CONCERNING PARASITES	5	5
853	N	CS	H-R	77	5	III. SPECIAL HYGIENE REQUIREMENTS FOR THE MANUFACTURE OF EGG PRODUCTS	5	5
853	N	CS	H-R	78	4	SECTION XI: FROGS' LEGS AND SNAILS	5	5
853	N	CS	H-R	78	6	SECTION XI: FROGS' LEGS AND SNAILS	5	5

## Sheet: ES
Regulation	Version	Language	Term	PDF EN Page	PDF EN paragraph	PDF EN article	Authors	Expert 1	Expert 2
178	O	ES	RA-RD	7	10	Article 3	5	5	4
178	O	ES	RA-RD	7	12	Article 3	5	5	4
178	O	ES	RA-RD	8	13	Article 3	5	5	4
178	O	ES	RA-RD	8	2	Article 6	5	5	4
178	O	ES	RA-RD	8	3	Article 6	5	5	4
178	O	ES	RA-RD	9	2	Article 7	5	5	4
178	O	ES	RA-RD	13	8	Article 23	5	5	4
178	O	ES	RA-RD	13	c	Article 23	5	5	4
178	N	ES	RA-RD	4	10	Article 3	5	5	4
178	N	ES	RA-RD	4	12	Article 3	5	5	4
178	N	ES	RA-RD	4	13	Article 3	5	5	4
178	N	ES	RA-RD	6	2	Article 6	5	5	4
178	N	ES	RA-RD	6	3	Article 6	5	5	4
178	N	ES	RA-RD	6	2	Article 7	5	5	4
178	N	ES	RA-RD	7	b	Article 8b	5	5	4
178	N	ES	RA-RD	15	8	Article 22	5	5	4
178	N	ES	RA-RD	15	c	Article 23	5	5	4
178	N	ES	RA-RD	25	6	Article 32b	5	5	4
178	N	ES	RA-RD	25	1	Article 32c	5	5	4
178	N	ES	RA-RD	26	2	Article 32c	5	5	4
178	N	ES	RA-RD	26	paragraph	Article 32d	5	5	4
625	O	ES	H-R	29	d	Article 14	5	5	4
625	O	ES	RPH-FR	14	2d	Article 16	3	5	2
625	N	ES	RPH-FR	19	2d	Article 16	3	5	2
852	O	ES	ADDR	50	2	CHAPTER VIII. PERSONAL HYGIENE	3	2	2
852	N	ES	ADDR	22	50	CHAPTER VIII. PERSONAL HYGIENE	3	2	2
853	O	ES	H-R	2	2	before Chapter 1	5	1	1
853	O	ES	D-H	108	6	II. HYGIENE REQUIREMENTS	3	1	1
853	O	ES	H-R	134	5	III. SPECIAL HYGIENE REQUIREMENTS FOR THE MANUFACTURE OF EGG PRODUCTS	5	1	1
853	O	ES	ADDR	49	2	ANNEX III. SPECIFIC REQUIREMENTS. SECTION I: MEAT OF DOMESTIC UNGULATES. CHAPTER I: TRANSPORT OF LIVE ANIMALS TO THE SLAUGHTERHOUSE	3	1	2
853	O	ES	ADDR	50	2	CHAPTER II: REQUIREMENTS FOR SLAUGHTERHOUSES	3	2	2
853	O	ES	ADDR	63	2	CHAPTER II: REQUIREMENTS FOR SLAUGHTERHOUSES	3	1	2
853	O	ES	ADDR	64	2	SECTION II: MEAT FROM POULTRY AND LAGOMORPHS. CHAPTER I: TRANSPORT OF LIVE ANIMALS TO THE SLAUGHTERHOUSE	3	2	2
853	O	ES	IN-R	145	1a	CHAPTER III: REQUIREMENTS FOR THE MANUFACTURE OF GELATINE	3	2	5
853	N	ES	D-H	68	6	II. HYGIENE REQUIREMENTS	3	1	1
853	N	ES	H-R	77	5	III. SPECIAL HYGIENE REQUIREMENTS FOR THE MANUFACTURE OF EGG PRODUCTS	5	1	1
853	N	ES	ADDR	25	2	ANNEX III. SPECIFIC REQUIREMENTS. SECTION I: MEAT OF DOMESTIC UNGULATES. CHAPTER I: TRANSPORT OF LIVE ANIMALS TO THE SLAUGHTERHOUSE	3	1	2
853	N	ES	ADDR	25	2	CHAPTER II: REQUIREMENTS FOR SLAUGHTERHOUSES	3	2	2
853	N	ES	ADDR	35	2	CHAPTER II: REQUIREMENTS FOR SLAUGHTERHOUSES	3	1	2
853	N	ES	ADDR	35	2	SECTION II: MEAT FROM POULTRY AND LAGOMORPHS. CHAPTER I: TRANSPORT OF LIVE ANIMALS TO THE SLAUGHTERHOUSE	3	2	2
853	N	ES	IN-R	82	1a	CHAPTER III: REQUIREMENTS FOR THE MANUFACTURE OF GELATINE	3	2	5

## Sheet: DA
Regulation	Version	Language	Term	PDF EN Page	PDF EN paragraph	PDF EN article	Authors	Expert 1
178	O	DA	R-H	2	15	before chapter I	5	5
178	O	DA	J-H	3	28	before chapter I	3	1
178	O	DA	RE-H	5	59	before chapter I	3	1
178	O	DA	POD-ROD	4	44	before chapter I	3	1
1381	S	DA	DDI-H	5	28	before Article 1	3	2
625	O	DA	ABB	29	d	Article 14	3	1
625	O	DA	H-R	84	paragraph	Article 112	5	1
625	O	DA	H-R	84	b	Article 112	5	1
625	O	DA	ABB	18	d	Article 14	3	1
625	O	DA	H-R	94	paragraph	Article 112	5	1
625	O	DA	H-R	94	b	Article 112	5	1
852	O	DA	H-R	4	10	before Chapter 1	5	5
852	O	DA	H-R	4	11	before Chapter 1	5	5
852	O	DA	H-R	10	1a	Article 2	5	5
852	O	DA	H-R	11	1f	Article 2	5	5
852	O	DA	H-R	15	title	Article 5	5	5
852	O	DA	H-R	15	2a	Article 5	5	5
852	O	DA	H-R	15	2b	Article 5	5	5
852	O	DA	H-R	16	2c	Article 5	5	5
852	O	DA	H-R	26	5c	Article 13	5	5
852	O	DA	H-R	32	3	ANNEX I. II HYEGIENE PROVISIONS	5	5
852	O	DA	H-R	35	7	ANNEX I. III RECORD KEEPING	5	5
852	O	DA	H-R	37	1	PART B: RECOMMENDATIONS FOR GUIDES TO GOOD HYGIENE PRACTICE	5	5
852	O	DA	H-R	37	2	PART B: RECOMMENDATIONS FOR GUIDES TO GOOD HYGIENE PRACTICE	5	5
852	O	DA	ADDR	50	2	CHAPTER VIII. PERSONAL HYGIENE	3	5
852	O	DA	R-H	51	5	CHAPTER IX. PROVISIONS APPLICABLE TO FOODSTUFFS	5	5
852	O	DA	R-H	51	6	CHAPTER IX. PROVISIONS APPLICABLE TO FOODSTUFFS	5	5
852	O	DA	R-H	52	7	CHAPTER IX. PROVISIONS APPLICABLE TO FOODSTUFFS	5	5
852	N	DA	H-R	3	1a	Article 2	5	5
852	N	DA	H-R	3	1f	Article 2	5	5
852	N	DA	H-R	5	title	Article 5	5	5
852	N	DA	H-R	5	2a	Article 5	5	5
852	N	DA	H-R	5	2b	Article 5	5	5
852	N	DA	H-R	5	2c	Article 5	5	5
852	N	DA	H-R	11	5c	Article 13	5	5
852	N	DA	H-R	14	3	ANNEX I. II HYEGIENE PROVISIONS	5	5
852	N	DA	H-R	15	7	ANNEX I. III RECORD KEEPING	5	5
852	N	DA	H-R	16	1	PART B: RECOMMENDATIONS FOR GUIDES TO GOOD HYGIENE PRACTICE	5	5
852	N	DA	H-R	16	2	PART B: RECOMMENDATIONS FOR GUIDES TO GOOD HYGIENE PRACTICE	5	5
852	N	DA	ADDR	22	2	CHAPTER VIII. PERSONAL HYGIENE	3	5
852	N	DA	R-H	23	5	CHAPTER IX. PROVISIONS APPLICABLE TO FOODSTUFFS	5	5
852	N	DA	R-H	23	6	CHAPTER IX. PROVISIONS APPLICABLE TO FOODSTUFFS	5	5
852	N	DA	R-H	23	7	CHAPTER IX. PROVISIONS APPLICABLE TO FOODSTUFFS	5	5
853	O	DA	H-R	2	2	before Chapter 1	5	5
853	O	DA	H-R	3	7	before Chapter 1	5	5
853	O	DA	ADDH	7	19	before Chapter 1	3	5
853	O	DA	H-R	8	22	before Chapter 1	5	5
853	O	DA	H-R	26	5c	Article 10	5	5
853	O	DA	ADDR	8	23	before Chapter 1	3	5
853	O	DA	H-R	43	1	SECTION II: OBJECTIVES OF HACCP-BASED PROCEDURES	5	5
853	O	DA	ADDH	49	1a	ANNEX III. SPECIFIC REQUIREMENTS. SECTION I: MEAT OF DOMESTIC UNGULATES. CHAPTER II: REQUIREMENTS FOR SLAUGHTERHOUSES	3	5
853	O	DA	D-H	108	6	II. HYGIENE REQUIREMENTS	3	5
853	O	DA	H-R	134	5	III. SPECIAL HYGIENE REQUIREMENTS FOR THE MANUFACTURE OF EGG PRODUCTS	5	5
853	O	DA	H-R	136	4	SECTION XI: FROGS' LEGS AND SNAILS	5	5
853	O	DA	H-R	137	6	SECTION XI: FROGS' LEGS AND SNAILS	5	5
853	O	DA	R-Z	76	2	CHAPTER II: HANDLING OF LARGE WILD GAME	3	5
853	O	DA	R-Z	78	1	CHAPTER III: HANDLING OF SMALL WILD GAME	3	5
853	O	DA	IN-R	145	1a	CHAPTER III: REQUIREMENTS FOR THE MANUFACTURE OF GELATINE	3	5
853	N	DA	H-R	11	paragraph	Article 11	5	5
853	N	DA	H-R	12	5c	Article 10	5	5
853	N	DA	H-R	21	1	SECTION II: OBJECTIVES OF HACCP-BASED PROCEDURES	5	5
853	N	DA	ADDH	25	1a	CHAPTER II: REQUIREMENTS FOR SLAUGHTERHOUSES	3	5
853	N	DA	D-H	63	6	II. HYGIENE REQUIREMENTS	3	5
853	N	DA	H-R	77	5	III. SPECIAL HYGIENE REQUIREMENTS FOR THE MANUFACTURE OF EGG PRODUCTS	5	5
853	N	DA	H-R	78	4	SECTION XI: FROGS' LEGS AND SNAILS	5	5
853	N	DA	H-R	78	6	SECTION XI: FROGS' LEGS AND SNAILS	5	5
853	N	DA	R-Z	42	2	CHAPTER II: HANDLING OF LARGE WILD GAME	3	5
853	N	DA	R-Z	44	1	CHAPTER III: HANDLING OF SMALL WILD GAME	3	5

## Sheet: DE
Regulation	Version	Language	Term	PDF EN Page	PDF EN paragraph	PDF EN article	Authors	Expert 1
178	O	DE	R-H	5	60	before chapter I	5	5
178	O	DE	R-H	12	3	Article 20	5	5
178	N	DE	R-H	14	3	Article 20	5	5
178	N	DE	R-H	25	2	Article 32c	5	5
1381	S	DE	R-H	4	24	before Article 1	5	4
1381	S	DE	R-H	12	2	Article 32c	5	4
625	O	DE	T-H	2	6	I (Legislative Acts)	3	5
625	O	DE	ADD	60	3i	Article 64	3	1
625	O	DE	ADD	79	3f	Article 100	3	1
625	O	DE	MISR	67	1g	Article 77	3	1
625	O	DE	MISR	72	b	Article 90	3	1
625	N	DE	ADD	60	3i	Article 64	3	1
625	N	DE	ADD	79	3f	Article 100	3	1
625	N	DE	MIS	70	1g	Article 77	3	1
625	N	DE	MIS	77	paragraph	Article 90	3	1
852	O	DE	Z-Q	45	2f	CHAPTER III. REQUIREMENTS	3	1
852	O	DE	ADDH	46	2	CHAPTER IV. TRANSPORT	3	5
852	O	DE	R-H	51	5	CHAPTER IX. PROVISIONS APPLICABLE TO FOODSTUFFS	5	5
852	O	DE	MISR	52	1	CHAPTER X. PROVISIONS APPLICABLE TO THE WRAPPING AND PACKAGING OF FOODSTUFFS	3	1
852	N	DE	Z-Q	19	2f	CHAPTER III. REQUIREMENTS	3	1
852	N	DE	ADDH	19	2	CHAPTER IV. TRANSPORT	3	5
852	N	DE	SC-R	22	paragraph	CHAPTER VII. WATER SUPPLY	3	5
852	N	DE	R-H	23	5	CHAPTER IX. PROVISIONS APPLICABLE TO FOODSTUFFS	5	5
852	N	DE	MISR	24	2	CHAPTER X. PROVISIONS APPLICABLE TO THE WRAPPING AND PACKAGING OF FOODSTUFFS	3	1
853	O	DE	R-Q	76	2	CHAPTER II: HANDLING OF LARGE WILD GAME	3	2
853	O	DE	R-Q	78	1	CHAPTER III: HANDLING OF SMALL WILD GAME	3	2
853	O	DE	MISR	117	3b	CHAPTER VI: WRAPPING AND PACKAGING OF FISHERY PRODUCTS	3	2
853	N	DE	R-Q	44	1	CHAPTER III: HANDLING OF SMALL WILD GAME	3	2
853	N	DE	MISR	68	3b	CHAPTER VI: WRAPPING AND PACKAGING OF FISHERY PRODUCTS	3	2
853	N	DE	MISR	82	1a	CHAPTER III: REQUIREMENTS FOR THE MANUFACTURE OF GELATINE	3	2
853	N	DE	R-H	87	paragraph	SECTION XVI: HIGHLY REFINED CHONDROITIN SULPHATE, HYALURONIC ACID, OTHER HYDROLYSED CARTILAGE PRODUCTS, CHITOSAN, GLUCOSAMINE, RENNET, ISINGLASS AND AMINO ACIDS	5	5

## Sheet: ET
Regulation	Version	Language	Term	PDF EN Page	PDF EN paragraph	PDF EN article	Authors	Expert 1
178	O	ET	U-Z	2	10	before chapter I	3	1
178	O	ET	I-Z	3	24	before chapter I	3	1
178	O	ET	I-Z	9	1	Article 12	3	1
178	O	ET	U-Z	10	6	Article 14	3	1
178	O	ET	U-Z	10	2	Article 15	3	1
178	O	ET	U-Z	10	2	Article 15	3	1
178	O	ET	U-Z	11	2	Article 15	3	1
178	O	ET	R-H	21	b	Article 50	5	5
178	O	ET	R-H	21	1	Article 52	5	5
178	N	ET	U-Z	9	1	Article 12	3	1
178	N	ET	U-Z	11	6	Article 14	3	1
178	N	ET	U-Z	11	1	Article 15	3	1
178	N	ET	U-Z	11	2	Article 15	3	1
178	N	ET	U-Z	11	2	Article 15	3	1
1381	S	ET	R-H	4	24	before Article 1	5	5
1381	S	ET	J-H	5	28	before Article 1	3	1
1381	S	ET	U-Z	3	19	before Article 1	3	2
1381	S	ET	R-H	4	24	before Article 1	5	5
625	O	ET	T-H	2	6	I (Legislative Acts)	4	1
625	O	ET	MISH	115	5	Annex II. Chapter I	3	1
615	N	ET	MISH	136	5	Annex II. Chapter I	3	1
852	O	ET	U-H	6	17	before Chapter 1	3	1
852	O	ET	H-R	12	7	ANNEX I. III RECORD KEEPING	5	5
852	O	ET	H-R	13	2	PART B: RECOMMENDATIONS FOR GUIDES TO GOOD HYGIENE PRACTICE	5	5
852	O	ET	ADDH	17	2	CHAPTER VIII. PERSONAL HYGIENE	3	5
852	O	ET	R-H	14	8	CHAPTER I. GENERAL REQUIREMENTS FOR FOOD PREMISES	5	5
852	O	ET	R-H	15	1	CHAPTER III. REQUIREMENTS	5	5
852	O	ET	MISR	16	2h	CHAPTER III. REQUIREMENTS	5	1
852	O	ET	R-H	16	5	CHAPTER IV. TRANSPORT	5	5
852	O	ET	R-H	16	6	CHAPTER IV. TRANSPORT	5	5
852	O	ET	R-H	16	1a	CHAPTER V. EQUIPMENT REQUIREMENTS	5	5
852	O	ET	R-H	16	1b	CHAPTER V. EQUIPMENT REQUIREMENTS	5	5
852	O	ET	R-H	17	3	CHAPTER VII. WATER SUPPLY	5	5
852	O	ET	R-H	18	5	CHAPTER IX. PROVISIONS APPLICABLE TO FOODSTUFFS	5	5
852	O	ET	R-H	18	6	CHAPTER IX. PROVISIONS APPLICABLE TO FOODSTUFFS	5	5
852	O	ET	R-H	18	7	CHAPTER IX. PROVISIONS APPLICABLE TO FOODSTUFFS	5	5
852	O	ET	R-H	18	2	CHAPTER X. PROVISIONS APPLICABLE TO THE WRAPPING AND PACKAGING OF FOODSTUFFS	5	5
853	O	ET	H-R	8	22	before Chapter 1	5	5
853	O	ET	MISR	56	9	CHAPTER IV: SLAUGHTER HYGIENE	3	4
853	O	ET	R-H	76	2	CHAPTER II: HANDLING OF LARGE WILD GAME	5	5
853	O	ET	R-H	78	1	CHAPTER III: HANDLING OF SMALL WILD GAME	5	5
853	O	ET	R-H	117	3b	CHAPTER VI: WRAPPING AND PACKAGING OF FISHERY PRODUCTS	5	5
853	O	ET	R-H	123	1	II. HYGIENE ON MILK PRODUCTION HOLDINGS. A. Requirements for premises and equipment	5	5
853	N	ET	R-H	65	paragraph	D. REQUIREMENTS CONCERNING PARASITES	5	5
853	N	ET	R-H	68	paragraph	E. TOXINS HARMFUL TO HUMAN HEALTH	5	5
853	N	ET	R-H	68	3b	CHAPTER VI: WRAPPING AND PACKAGING OF FISHERY PRODUCTS	5	5
853	N	ET	MISR	71	1	A. Requirements for premises and equipment	3	1
853	N	ET	R-H	82	paragraph	CHAPTER II: TRANSPORT AND STORAGE OF RAW MATERIALS	5	5
853	N	ET	R-H	85	paragraph	CHAPTER II: TRANSPORT AND STORAGE OF RAW MATERIALS	5	5

## Sheet: EL
Regulation	Version	Language	Term	PDF EN Page	PDF EN paragraph	PDF EN article	Authors	Expert 1
178	O	EL	H-SD	8	14	Article 3	5	5
178	O	EL	H-SD	15	4f	Article 28	5	5
178	O	EL	CMP-RPM	13	h	Article 23	3	5
178	N	EL	H-SD	4	14	Article 3	5	5
178	N	EL	H-SD	20	4f	Article 28	5	5
178	N	EL	CMP-RMP	16	h	Article 23	3	5
1381	S	EL	H-SD	2	6	before Article 1	5	5
1381	S	EL	H-SD	2	10	before Article 1	5	5
1381	S	EL	J-H	5	28	before Article 1	3	2
625	O	EL	T-H	2	6	I (Legislative Acts)	3	2
625	O	EL	H-RF	5	25	I (Legislative Acts)	5	5
625	O	EL	H-RF	20	23	Article 3	5	5
625	O	EL	H-RF	29	d	Article 14	5	5
625	O	EL	H-RF	33	8a	Article 18	5	5
625	O	EL	H-RF	33	8f	Article 18	5	5
625	O	EL	H-RF	34	2a	Article 19	5	5
625	O	EL	H-RF	34	3a	Article 19	5	5
625	O	EL	H-RF	34	2a	Article 20	5	5
625	O	EL	H-RF	34	2b	Article 20	5	5
625	O	EL	H-RF	35	3a	Article 20	5	5
625	O	EL	H-RF	34	3b	Article 20	5	5
625	O	EL	H-RF	37	2a	Article 22	5	5
625	O	EL	H-RF	37	3a	Article 22	5	5
625	O	EL	H-RF	38	2a	Article 23	5	5
625	O	EL	H-RF	38	3	Article 23	5	5
625	O	EL	H-RF	39	3a	Article 24	5	5
625	O	EL	H-RF	39	4a	Article 24	5	5
625	O	EL	H-RF	41	1a	Article 27	5	5
625	O	EL	H-RF	41	2	Article 27	5	5
625	O	EL	H-RF	44	2	Article 35	5	5
625	O	EL	H-RF	84	paragraph	Article 112	5	5
625	O	EL	H-RF	91	3c	Article 127	5	5
625	O	EL	H-RF	91	3d	Article 127	5	5
625	O	EL	H-RF	115	5	Annex II. Chapter I	5	5
625	N	EL	H-RF	6	23	Article 3	5	5
625	N	EL	H-RF	18	d	Article 14	5	5
625	N	EL	H-RF	24	8a	Article 18	5	5
625	N	EL	H-RF	23	8f	Article 18	5	5
625	N	EL	H-RF	25	2a	Article 19	5	5
625	N	EL	H-RF	25	3a	Article 19	5	5
625	N	EL	H-RF	25	2a	Article 20	5	5
625	N	EL	H-RF	25	2b	Article 20	5	5
625	N	EL	H-RF	26	3a	Article 20	5	5
625	N	EL	H-RF	26	3b	Article 20	5	5
625	N	EL	H-RF	29	2a	Article 22	5	5
625	N	EL	H-RF	29	3a	Article 22	5	5
625	N	EL	H-RF	30	2a	Article 23	5	5
625	N	EL	Z-D	31	footnote2	Article 24	3	5
625	N	EL	H-RF	32	3	Article 23	5	5
625	N	EL	H-RF	32	3a	Article 24	5	5
625	N	EL	H-RF	32	4a	Article 24	5	5
625	N	EL	H-RF	34	1a	Article 27	5	5
625	N	EL	H-RF	35	2	Article 27	5	5
625	N	EL	H-RF	39	2	Article 35	5	5
625	N	EL	H-RF	94	paragraph	Article 112	5	5
625	N	EL	H-RF	103	3c	Article 127	5	5
625	N	EL	H-RF	103	3d	Article 127	5	5
625	N	EL	H-RF	136	5	Annex II.Chapter I	5	5
852	O	EL	H-SD	4	10	before Chapter 1	5	5
852	O	EL	H-SD	10	1a	Article 2	5	5
852	O	EL	H-SD	11	1f	Article 2	5	5
852	O	EL	H-SD	11	1l	Article 2	5	5
852	O	EL	H-SD	15	2a	Article 5	5	5
852	O	EL	H-SD	15	1b	Article 5	5	5
852	O	EL	H-SD	16	2c	Article 5	5	5
852	O	EL	H-SD	26	5c	Article 13	5	5
852	O	EL	H-SD	32	3	ANNEX I. II HYGIENE PROVISIONS	5	5
852	O	EL	Z-R	33	4g	ANNEX I. II HYGIENE PROVISIONS	3	5
852	O	EL	Z-R	34	5f	ANNEX I. II HYGIENE PROVISIONS	3	5
852	O	EL	H-SD	35	7	ANNEX I. III RECORD KEEPING	5	5
852	O	EL	H-SD	37	1	PART B: RECOMMENDATIONS FOR GUIDES TO GOOD HYGIENE PRACTICE	5	5
852	O	EL	H-SD	37	2	PART B: RECOMMENDATIONS FOR GUIDES TO GOOD HYGIENE PRACTICE	5	5
852	O	EL	Z-Q	45	2f	CHAPTER III. REQUIREMENTS	3	1
852	O	EL	H-R	49	5	CHAPTER VII. WATER SUPPLY	5	5
852	O	EL	ADDR	50	2	CHAPTER VIII. PERSONAL HYGIENE	3	2
852	O	EL	Z-R	52	8	CHAPTER IX. PROVISIONS APPLICABLE TO FOODSTUFFS	3	5
852	N	EL	H-SD	3	1a	before Chapter 1	5	5
852	N	EL	H-SD	3	1f	before Chapter 1	5	5
852	N	EL	H-SD	3	1l	Article 2	5	5
852	N	EL	H-SD	5	2a	Article 5	5	5
852	N	EL	H-SD	5	1b	Article 5	5	5
852	N	EL	H-SD	5	2c	Article 5	5	5
852	N	EL	H-SD	11	5c	Article 13	5	5
852	N	EL	H-SD	14	3	ANNEX I. II HYGIENE PROVISIONS	5	5
852	N	EL	Z-R	15	4g	ANNEX I. II HYGIENE PROVISIONS	3	5
852	N	EL	Z-R	15	5f	ANNEX I. II HYGIENE PROVISIONS	3	5
852	N	EL	H-SD	15	7	ANNEX I. III RECORD KEEPING	5	5
852	N	EL	H-SD	15	1	PART B: RECOMMENDATIONS FOR GUIDES TO GOOD HYGIENE PRACTICE	5	5
852	N	EL	H-SD	15	2	PART B: RECOMMENDATIONS FOR GUIDES TO GOOD HYGIENE PRACTICE	5	5
852	N	EL	Z-Q	19	2f	CHAPTER III. REQUIREMENTS	3	1
852	N	EL	ADDR	22	2	CHAPTER VIII. PERSONAL HYGIENE	3	2
852	N	EL	Z-R	23	8	CHAPTER IX. PROVISIONS APPLICABLE TO FOODSTUFFS	3	5
853	O	EL	ADDR	25	3	Article 10	3	1
853	O	EL	ADDR	96	2c	CHAPTER III: STRUCTURAL REQUIREMENTS FOR DISPATCH AND PURIFICATION CENTRES	3	1
853	O	EL	ADDR	134	2	III. SPECIAL HYGIENE REQUIREMENTS FOR THE MANUFACTURE OF EGG PRODUCTS	3	2
853	N	EL	ADDR	11	3	Article 10	3	1
853	N	EL	ADDR	12	5c	Article 10	3	1
853	N	EL	ADDR	25	1a	CHAPTER II: REQUIREMENTS FOR SLAUGHTERHOUSES	3	1
853	N	EL	ADDR	77	2	III. SPECIAL HYGIENE REQUIREMENTS FOR THE MANUFACTURE OF EGG PRODUCTS	3	1

## Sheet: FR
Regulation	Version	Language	Term	PDF EN Page	PDF EN paragraph	PDF EN article	Authors	Expert 1
178	O	FR	U-Z	2	10	before chapter I	3	4
178	O	FR	U-Z	3	24	before chapter I	3	1
178	O	FR	U-Z	9	1	Article 12	3	5
178	O	FR	I-Z	10	1	Article 14	3	5
178	O	FR	U-Z	10	2a	Article 14	3	1
178	O	FR	U-Z	10	3	Article 14	3	1
178	O	FR	U-Z	10	6	Article 14	3	1
178	O	FR	U-Z	10	8	Article 14	3	1
178	O	FR	U-Z	10	1	Article 15	3	1
178	O	FR	U-Z	10	2	Article 15	3	1
178	O	FR	U-Z	10	2	Article 15	3	1
178	O	FR	U-Z	11	3	Article 17	3	4
178	O	FR	U-Z	11	5	Article 17	3	1
178	O	FR	H-R	15	4f	Article 28	5	5
178	O	FR	ADD	3	26	before chapter I	5	1
178	N	FR	I-Z	9	2	Article 12	3	1
178	N	FR	U-Z	10	1	Article 14	3	1
178	N	FR	U-Z	10	2	Article 14	3	1
178	N	FR	U-Z	10	3	Article 14	3	1
178	N	FR	U-Z	11	6	Article 14	3	1
178	N	FR	U-Z	11	8	Article 14	3	1
178	N	FR	U-Z	11	1	Article 14	3	1
178	N	FR	U-Z	11	2	Article 14	3	1
178	N	FR	U-Z	11	2	Article 15	3	1
178	N	FR	TAW	11	3	Article 15	3	2
178	N	FR	U-Z	11	5	Article 15	3	1
625	O	FR	ADD	88	g(viii)	Article 121	3	2
625	N	FR	ADD	100	g(viii)	Article 121	3	2
852	O	FR	H-R	4	11	before Chapter 1	5	5
852	O	FR	H-R	15	title	Article 5	5	5
852	O	FR	H-R	26	5c	Article 13	5	5
852	O	FR	I-Z	51	3	CHAPTER IX. PROVISIONS APPLICABLE TO FOODSTUFFS	3	5
852	O	FR	MISR	44	1	CHAPTER III. REQUIREMENTS	3	5
852	O	FR	ADDR	50	2	CHAPTER VIII. PERSONAL HYGIENE	3	2
852	N	FR	H-R	11	5c	Article 13	5	5
852	N	FR	ADDR	22	2	CHAPTER VIII. PERSONAL HYGIENE	3	2
853	O	FR	H-R	3	7	before Chapter 1	5	5
853	O	FR	H-R	8	22	before Chapter 1	5	5
853	O	FR	H-R	25	5c	Article 10	5	5
853	O	FR	H-R	28	8	Article 11	5	5
853	O	FR	H-R	43	1	SECTION II: OBJECTIVES OF HACCP-BASED PROCEDURES	5	5
853	O	FR	D-H	108	6	II. HYGIENE REQUIREMENTS	3	1
853	O	FR	HF-Z	116	tite	E. TOXINES DANGEREUSES POUR LA SANTÉ HUMAINE	3	5
853	O	FR	H-R	134	5	III. SPECIAL HYGIENE REQUIREMENTS FOR THE MANUFACTURE OF EGG PRODUCTS	5	5
853	O	FR	ADDR	105	2	B. Requirements for vessels designed and equipped to preserve fresh fishery products for more than twenty-four hours	3	2
853	O	FR	ADDR	144	5b	CHAPTER I: REQUIREMENTS FOR RAW MATERIALS	3	2
853	O	FR	ADDR	148	5b	CHAPTER I: REQUIREMENTS FOR RAW MATERIALS	3	2
853	N	FR	H-R	11	2	III. SPECIAL HYGIENE REQUIREMENTS FOR THE MANUFACTURE OF EGG PRODUCTS	5	5
853	N	FR	D-H	63	6	II. HYGIENE REQUIREMENTS	3	1
853	N	FR	H-R	66	3d	D. REQUIREMENTS CONCERNING PARASITES	5	5
853	N	FR	H-R	66	3c(ii)	D. REQUIREMENTS CONCERNING PARASITES	5	5
853	N	FR	H-R	66	4b	D. REQUIREMENTS CONCERNING PARASITES	5	5
853	N	FR	HF-Z	68	title	E. TOXINES DANGEREUSES POUR LA SANTÉ HUMAINE	3	1
853	N	FR	R-H	53	2c	C. REQUIREMENTS FOR RELAYING LIVE BIVALVE MOLLUSCS	5	4
853	N	FR	ADDR	61	2	B. Requirements for vessels designed and equipped to preserve fresh fishery products for more than 24 hours	3	2
853	N	FR	ADDR	71	1d	B. Hygiene during milking, collection and transport	3	2
853	N	FR	ADDR	82	5b	SECTION XIV: GELATINE. CHAPTER I: REQUIREMENTS FOR RAW MATERIALS	3	2
853	N	FR	ADDR	85	5b	SECTION XV: COLLAGEN. CHAPTER I: REQUIREMENTS FOR RAW MATERIALS	3	2

## Sheet: GA
Regulation	Version	Language	Term	PDF EN Page	PDF EN paragraph	PDF EN article	Authors	Expert 1
625	O	GA	R-MA	50	4	Article 44	3	4
625	O	GA	MISR	67	1g	Article 77	3	5
625	N	GA	MISR	47	4	Article 44	3	4
625	N	GA	MISR	70	1g	Article 77	3	5

## Sheet: HR
Regulation	Version	Language	Term	PDF EN Page	PDF EN paragraph	PDF EN article	Authors	Expert 1
178	O	HR	RE-H	5	59	before chapter I	3	5
852	O	HR	R-H	14	8	CHAPTER I. GENERAL REQUIREMENTS FOR FOOD PREMISES	5	5
852	O	HR	R-H	15	1	CHAPTER III. REQUIREMENTS	5	5
852	O	HR	R-H	15	2h	CHAPTER II. SPECIFIC REQUIREMENTS	5	5
852	O	HR	R-H	15	5	CHAPTER IV. TRANSPORT	5	5
852	O	HR	R-H	16	6	CHAPTER IV. TRANSPORT	5	5
852	O	HR	R-H	16	1a	CHAPTER V. EQUIPMENT REQUIREMENTS	5	5
852	O	HR	R-H	16	1b	CHAPTER V. EQUIPMENT REQUIREMENTS	5	5
852	O	HR	R-H	17	3	CHAPTER VII. WATER SUPPLY	5	5
852	O	HR	ADDH	17	2	CHAPTER VIII. PERSONAL HYGIENE	3	5
852	O	HR	R-H	18	7	CHAPTER VIII. PERSONAL HYGIENE	5	5
852	N	HR	R-H	18	8	CHAPTER I. GENERAL REQUIREMENTS FOR FOOD PREMISES	5	5
852	N	HR	R-H	19	1	CHAPTER III. REQUIREMENTS	5	5
852	N	HR	R-H	19	2h	CHAPTER II. SPECIFIC REQUIREMENTS	5	5
852	N	HR	R-H	20	5	CHAPTER IV. TRANSPORT	5	5
852	N	HR	R-H	20	6	CHAPTER IV. TRANSPORT	5	5
852	N	HR	R-H	20	1a	CHAPTER V. EQUIPMENT REQUIREMENTS	5	5
852	N	HR	R-H	20	1b	CHAPTER V. EQUIPMENT REQUIREMENTS	5	5
852	N	HR	R-H	22	3	CHAPTER VII. WATER SUPPLY	5	5
852	N	HR	ADDH	22	2	CHAPTER VIII. PERSONAL HYGIENE	3	5
852	N	HR	R-H	23	7	CHAPTER VIII. PERSONAL HYGIENE	5	5
853	O	HR	R-H	56	9	CHAPTER IV: SLAUGHTER HYGIENE	5	5
853	O	HR	R-H	73	3a	SECTION III: MEAT OF FARMED GAME	5	5
853	O	HR	R-H	76	2	CHAPTER II: HANDLING OF LARGE WILD GAME	5	5
853	O	HR	R-H	78	1	CHAPTER III: HANDLING OF SMALL WILD GAME	5	5
853	O	HR	R-H	95	1	C. REQUIREMENTS FOR RELAYING LIVE BIVALVE MOLLUSCS	5	5
853	O	HR	R-H	47	3b	CHAPTER VI: WRAPPING AND PACKAGING OF FISHERY PRODUCTS	5	5
853	O	HR	R-H	50	1	A. Requirements for premises and equipment	5	5
853	N	HR	D-H	63	6	II. HYGIENE REQUIREMENTS	3	2
853	N	HR	H-R	77	5	III. SPECIAL HYGIENE REQUIREMENTS FOR THE MANUFACTURE OF EGG PRODUCTS	5	5
853	N	HR	R-H	28	9	CHAPTER IV: SLAUGHTER HYGIENE	5	5
853	N	HR	R-H	40	3a	SECTION III: MEAT OF FARMED GAME	5	5
853	N	HR	R-H	42	2	CHAPTER II: HANDLING OF LARGE WILD GAME	5	5
853	N	HR	R-H	42	1	CHAPTER III: HANDLING OF SMALL WILD GAME	5	5
853	N	HR	R-H	53	1	C. REQUIREMENTS FOR RELAYING LIVE BIVALVE MOLLUSCS	5	5
853	N	HR	R-H	68	3b	CHAPTER VI: WRAPPING AND PACKAGING OF FISHERY PRODUCTS	5	5

[truncated: 14 more sheets: IT, LV, LT, HU, MT, NL, PL, PT, RO, SK, SL, FI, SV, Sheet1]
