# Supplementary material for: Food Risk Analysis: Towards a Better Understanding of „Hazard” and „Risk” in EU food legislation
Source: Preprints.org preprint supplement (doi:10.20944/preprints202306.1556.v1), 2023-06-21
Supplement: Supplementary file 29 [file Supplementary Material 5.xlsx]

## Sheet: Pivot
EUmember	Language	Version	Term	TermCode	Authors	Author	EUFORA1	EUFORA2	EUFORA3	EUFORA4	EUave	EUmed	Regulation
BG	1	1	R-H..	1	5	1	1	0	0	0	1	1	178
BG	1	1	R-H..	1	5	1	1	0	0	0	1	1	625
BG	1	1	R-H..	1	5	1	1	0	0	0	1	1	625
BG	1	1	H-R..	5	5	1	1	0	0	0	1	1	852
BG	1	1	H-R..	5	5	1	1	0	0	0	1	1	853
BG	1	1	H-R..	5	5	1	1	0	0	0	1	1	853
BG	1	1	R-H..	1	5	1	5	0	0	0	5	5	178
BG	1	1	R-H..	1	5	1	5	0	0	0	5	5	178
BG	1	1	H-R..	5	5	1	5	0	0	0	5	5	853
BG	1	1	H-R..	5	5	1	5	0	0	0	5	5	853
BG	1	2	H-R..	5	5	1	1	0	0	0	1	1	853
BG	1	2	H-R..	5	5	1	5	0	0	0	5	5	853
BG	1	2	H-R..	5	5	1	5	0	0	0	5	5	853
CS	2	1	H-R..	5	5	1	5	0	0	0	5	5	625
CS	2	1	H-R..	5	5	1	5	0	0	0	5	5	852
CS	2	1	H-R..	5	5	1	5	0	0	0	5	5	852
CS	2	1	H-R..	5	5	1	5	0	0	0	5	5	852
CS	2	1	H-R..	5	5	1	5	0	0	0	5	5	852
CS	2	1	H-R..	5	5	1	5	0	0	0	5	5	852
CS	2	1	H-R..	5	5	1	5	0	0	0	5	5	852
CS	2	1	H-R..	5	5	1	5	0	0	0	5	5	852
CS	2	1	H-R..	5	5	1	5	0	0	0	5	5	852
CS	2	1	H-R..	5	5	1	5	0	0	0	5	5	853
CS	2	1	H-R..	5	5	1	5	0	0	0	5	5	853
CS	2	1	H-R..	5	5	1	5	0	0	0	5	5	853
CS	2	1	H-R..	5	5	1	5	0	0	0	5	5	853
CS	2	1	H-R..	5	5	1	5	0	0	0	5	5	853
CS	2	1	H-R..	5	5	1	5	0	0	0	5	5	853
CS	2	1	H-R..	5	5	1	5	0	0	0	5	5	853
CS	2	1	H-R..	5	5	1	5	0	0	0	5	5	853
CS	2	1	H-R..	5	5	1	5	0	0	0	5	5	853
CS	2	1	H-R..	5	5	1	5	0	0	0	5	5	853
CS	2	2	H-R..	5	5	1	5	0	0	0	5	5	852
CS	2	2	H-R..	5	5	1	5	0	0	0	5	5	852
CS	2	2	H-R..	5	5	1	5	0	0	0	5	5	852
CS	2	2	H-R..	5	5	1	5	0	0	0	5	5	852
CS	2	2	H-R..	5	5	1	5	0	0	0	5	5	852
CS	2	2	H-R..	5	5	1	5	0	0	0	5	5	852
CS	2	2	H-R..	5	5	1	5	0	0	0	5	5	852
CS	2	2	H-R..	5	5	1	5	0	0	0	5	5	852
CS	2	2	H-R..	5	5	1	5	0	0	0	5	5	625
CS	2	2	H-R..	5	5	1	5	0	0	0	5	5	853
CS	2	2	H-R..	5	5	1	5	0	0	0	5	5	853
CS	2	2	H-R..	5	5	1	5	0	0	0	5	5	853
CS	2	2	H-R..	5	5	1	5	0	0	0	5	5	853
CS	2	2	H-R..	5	5	1	5	0	0	0	5	5	853
CS	2	2	H-R..	5	5	1	5	0	0	0	5	5	853
ES	3	2	H-R..	5	5	1	1	1	0	0	1	1	853
ES	3	2	RA-RD	3	5	1	5	4	0	0	4.5	4.5	178
ES	3	2	RA-RD	3	5	1	5	4	0	0	4.5	4.5	178
ES	3	2	RA-RD	3	5	1	5	4	0	0	4.5	4.5	178
ES	3	2	RA-RD	3	5	1	5	4	0	0	4.5	4.5	178
ES	3	2	RA-RD	3	5	1	5	4	0	0	4.5	4.5	178
ES	3	2	RA-RD	3	5	1	5	4	0	0	4.5	4.5	178
ES	3	2	RA-RD	3	5	1	5	4	0	0	4.5	4.5	178
ES	3	2	RA-RD	3	5	1	5	4	0	0	4.5	4.5	178
ES	3	2	RA-RD	3	5	1	5	4	0	0	4.5	4.5	178
ES	3	2	RA-RD	3	5	1	5	4	0	0	4.5	4.5	178
ES	3	2	RA-RD	3	5	1	5	4	0	0	4.5	4.5	178
ES	3	2	RA-RD	3	5	1	5	4	0	0	4.5	4.5	178
ES	3	2	RA-RD	3	5	1	5	4	0	0	4.5	4.5	178
ES	3	1	H-R..	5	5	1	1	1	0	0	1	1	853
ES	3	1	H-R..	5	5	1	1	1	0	0	1	1	853
ES	3	1	RA-RD	3	5	1	5	4	0	0	4.5	4.5	178
ES	3	1	RA-RD	3	5	1	5	4	0	0	4.5	4.5	178
ES	3	1	RA-RD	3	5	1	5	4	0	0	4.5	4.5	178
ES	3	1	RA-RD	3	5	1	5	4	0	0	4.5	4.5	178
ES	3	1	RA-RD	3	5	1	5	4	0	0	4.5	4.5	178
ES	3	1	RA-RD	3	5	1	5	4	0	0	4.5	4.5	178
ES	3	1	RA-RD	3	5	1	5	4	0	0	4.5	4.5	178
ES	3	1	RA-RD	3	5	1	5	4	0	0	4.5	4.5	178
ES	3	1	H-R..	5	5	1	5	4	0	0	4.5	4.5	625
DA	4	1	R-H..	1	5	1	5	0	0	0	5	5	178
DA	4	1	H-R..	5	5	1	1	0	0	0	1	1	625
DA	4	1	H-R..	5	5	1	1	0	0	0	1	1	625
DA	4	1	H-R..	5	5	1	1	0	0	0	1	1	625
DA	4	1	H-R..	5	5	1	1	0	0	0	1	1	625
DA	4	1	H-R..	5	5	1	5	0	0	0	5	5	852
DA	4	1	H-R..	5	5	1	5	0	0	0	5	5	852
DA	4	1	H-R..	5	5	1	5	0	0	0	5	5	852
DA	4	1	H-R..	5	5	1	5	0	0	0	5	5	852
DA	4	1	H-R..	5	5	1	5	0	0	0	5	5	852
DA	4	1	H-R..	5	5	1	5	0	0	0	5	5	852
DA	4	1	H-R..	5	5	1	5	0	0	0	5	5	852
DA	4	1	H-R..	5	5	1	5	0	0	0	5	5	852
DA	4	1	H-R..	5	5	1	5	0	0	0	5	5	852
DA	4	1	H-R..	5	5	1	5	0	0	0	5	5	852
DA	4	1	H-R..	5	5	1	5	0	0	0	5	5	852
DA	4	1	H-R..	5	5	1	5	0	0	0	5	5	852
DA	4	1	H-R..	5	5	1	5	0	0	0	5	5	852
DA	4	1	R-H..	1	5	1	5	0	0	0	5	5	852
DA	4	1	R-H..	1	5	1	5	0	0	0	5	5	852
DA	4	1	R-H..	1	5	1	5	0	0	0	5	5	852
DA	4	1	H-R..	5	5	1	5	0	0	0	5	5	853
DA	4	1	H-R..	5	5	1	5	0	0	0	5	5	853
DA	4	1	H-R..	5	5	1	5	0	0	0	5	5	853
DA	4	1	H-R..	5	5	1	5	0	0	0	5	5	853
DA	4	1	H-R..	5	5	1	5	0	0	0	5	5	853
DA	4	1	H-R..	5	5	1	5	0	0	0	5	5	853
DA	4	1	H-R..	5	5	1	5	0	0	0	5	5	853
DA	4	1	H-R..	5	5	1	5	0	0	0	5	5	853
DA	4	2	H-R..	5	5	1	5	0	0	0	5	5	852
DA	4	2	H-R..	5	5	1	5	0	0	0	5	5	852
DA	4	2	H-R..	5	5	1	5	0	0	0	5	5	852
DA	4	2	H-R..	5	5	1	5	0	0	0	5	5	852
DA	4	2	H-R..	5	5	1	5	0	0	0	5	5	852
DA	4	2	H-R..	5	5	1	5	0	0	0	5	5	852
DA	4	2	H-R..	5	5	1	5	0	0	0	5	5	852
DA	4	2	H-R..	5	5	1	5	0	0	0	5	5	852
DA	4	2	H-R..	5	5	1	5	0	0	0	5	5	852
DA	4	2	H-R..	5	5	1	5	0	0	0	5	5	852
DA	4	2	H-R..	5	5	1	5	0	0	0	5	5	852
DA	4	2	R-H..	1	5	1	5	0	0	0	5	5	852
DA	4	2	R-H..	1	5	1	5	0	0	0	5	5	852
DA	4	2	R-H..	1	5	1	5	0	0	0	5	5	852
DA	4	2	H-R..	5	5	1	5	0	0	0	5	5	853
DA	4	2	H-R..	5	5	1	5	0	0	0	5	5	853
DA	4	2	H-R..	5	5	1	5	0	0	0	5	5	853
DA	4	2	H-R..	5	5	1	5	0	0	0	5	5	853
DA	4	2	H-R..	5	5	1	5	0	0	0	5	5	853
DA	4	2	H-R..	5	5	1	5	0	0	0	5	5	853
DE	5	1	R-H..	1	5	1	5	0	0	0	5	5	852
DE	5	1	R-H..	1	5	1	5	0	0	0	5	5	178
DE	5	1	R-H..	1	5	1	5	0	0	0	5	5	178
DE	5	2	R-H..	1	5	1	5	0	0	0	5	5	852
DE	5	2	R-H..	1	5	1	5	0	0	0	5	5	853
DE	5	2	R-H..	1	5	1	5	0	0	0	5	5	178
DE	5	2	R-H..	1	5	1	5	0	0	0	5	5	178
DE	5	3	R-H..	1	5	1	4	0	0	0	4	4	1381
DE	5	3	R-H..	1	5	1	4	0	0	0	4	4	1381
ET	6	1	H-R..	5	5	1	5	0	0	0	5	5	852
ET	6	1	H-R..	5	5	1	5	0	0	0	5	5	852
ET	6	1	R-H..	1	5	1	5	0	0	0	5	5	852
ET	6	1	R-H..	1	5	1	5	0	0	0	5	5	852
ET	6	1	R-H..	1	5	1	5	0	0	0	5	5	178
ET	6	1	R-H..	1	5	1	5	0	0	0	5	5	178
ET	6	1	R-H..	1	5	1	5	0	0	0	5	5	852
ET	6	1	R-H..	1	5	1	5	0	0	0	5	5	852
ET	6	1	R-H..	1	5	1	5	0	0	0	5	5	852
ET	6	1	R-H..	1	5	1	5	0	0	0	5	5	852
ET	6	1	R-H..	1	5	1	5	0	0	0	5	5	852
ET	6	1	R-H..	1	5	1	5	0	0	0	5	5	852
ET	6	1	R-H..	1	5	1	5	0	0	0	5	5	852
ET	6	1	R-H..	1	5	1	5	0	0	0	5	5	852
ET	6	1	R-H..	1	5	1	5	0	0	0	5	5	852
ET	6	1	H-R..	5	5	1	5	0	0	0	5	5	853
ET	6	1	R-H..	1	5	1	5	0	0	0	5	5	853
ET	6	1	R-H..	1	5	1	5	0	0	0	5	5	853
ET	6	1	R-H..	1	5	1	5	0	0	0	5	5	853
ET	6	1	R-H..	1	5	1	5	0	0	0	5	5	853
ET	6	2	R-H..	1	5	1	5	0	0	0	5	5	853
ET	6	2	R-H..	1	5	1	5	0	0	0	5	5	853
ET	6	2	R-H..	1	5	1	5	0	0	0	5	5	853
ET	6	2	R-H..	1	5	1	5	0	0	0	5	5	853
ET	6	2	R-H..	1	5	1	5	0	0	0	5	5	853
ET	6	3	R-H..	1	5	1	5	0	0	0	5	5	1381
EL	7	2	H-SD.	4	5	1	5	0	0	0	5	5	178
EL	7	2	H-SD.	4	5	1	5	0	0	0	5	5	178
EL	7	2	H-RF.	2	5	1	5	0	0	0	5	5	625
EL	7	2	H-RF.	2	5	1	5	0	0	0	5	5	625
EL	7	2	H-RF.	2	5	1	5	0	0	0	5	5	625
EL	7	2	H-RF.	2	5	1	5	0	0	0	5	5	625
EL	7	2	H-RF.	2	5	1	5	0	0	0	5	5	625
EL	7	2	H-RF.	2	5	1	5	0	0	0	5	5	625
EL	7	2	H-RF.	2	5	1	5	0	0	0	5	5	625
EL	7	2	H-RF.	2	5	1	5	0	0	0	5	5	625
EL	7	2	H-RF.	2	5	1	5	0	0	0	5	5	625
EL	7	2	H-RF.	2	5	1	5	0	0	0	5	5	625
EL	7	2	H-RF.	2	5	1	5	0	0	0	5	5	625
EL	7	2	H-RF.	2	5	1	5	0	0	0	5	5	625
EL	7	2	H-RF.	2	5	1	5	0	0	0	5	5	625
EL	7	2	H-RF.	2	5	1	5	0	0	0	5	5	625
EL	7	2	H-RF.	2	5	1	5	0	0	0	5	5	625
EL	7	2	H-RF.	2	5	1	5	0	0	0	5	5	625
EL	7	2	H-RF.	2	5	1	5	0	0	0	5	5	625
EL	7	2	H-RF.	2	5	1	5	0	0	0	5	5	625
EL	7	2	H-RF.	2	5	1	5	0	0	0	5	5	625
EL	7	2	H-RF.	2	5	1	5	0	0	0	5	5	625
EL	7	2	H-RF.	2	5	1	5	0	0	0	5	5	625
EL	7	2	H-RF.	2	5	1	5	0	0	0	5	5	625
EL	7	2	H-RF.	2	5	1	5	0	0	0	5	5	625
EL	7	2	H-SD.	4	5	1	5	0	0	0	5	5	852
EL	7	2	H-SD.	4	5	1	5	0	0	0	5	5	852
EL	7	2	H-SD.	4	5	1	5	0	0	0	5	5	852
EL	7	2	H-SD.	4	5	1	5	0	0	0	5	5	852
EL	7	2	H-SD.	4	5	1	5	0	0	0	5	5	852
EL	7	2	H-SD.	4	5	1	5	0	0	0	5	5	852
EL	7	2	H-SD.	4	5	1	5	0	0	0	5	5	852
EL	7	2	H-SD.	4	5	1	5	0	0	0	5	5	852
EL	7	2	H-SD.	4	5	1	5	0	0	0	5	5	852
EL	7	2	H-SD.	4	5	1	5	0	0	0	5	5	852
EL	7	2	H-SD.	4	5	1	5	0	0	0	5	5	852
EL	7	1	H-SD.	4	5	1	5	0	0	0	5	5	178
EL	7	1	H-SD.	4	5	1	5	0	0	0	5	5	178
EL	7	1	H-RF.	2	5	1	5	0	0	0	5	5	625
EL	7	1	H-RF.	2	5	1	5	0	0	0	5	5	625
EL	7	1	H-RF.	2	5	1	5	0	0	0	5	5	625
EL	7	1	H-RF.	2	5	1	5	0	0	0	5	5	625
EL	7	1	H-RF.	2	5	1	5	0	0	0	5	5	625
EL	7	1	H-RF.	2	5	1	5	0	0	0	5	5	625
EL	7	1	H-RF.	2	5	1	5	0	0	0	5	5	625
EL	7	1	H-RF.	2	5	1	5	0	0	0	5	5	625
EL	7	1	H-RF.	2	5	1	5	0	0	0	5	5	625
EL	7	1	H-RF.	2	5	1	5	0	0	0	5	5	625
EL	7	1	H-RF.	2	5	1	5	0	0	0	5	5	625
EL	7	1	H-RF.	2	5	1	5	0	0	0	5	5	625
EL	7	1	H-RF.	2	5	1	5	0	0	0	5	5	625
EL	7	1	H-RF.	2	5	1	5	0	0	0	5	5	625
EL	7	1	H-RF.	2	5	1	5	0	0	0	5	5	625
EL	7	1	H-RF.	2	5	1	5	0	0	0	5	5	625
EL	7	1	H-RF.	2	5	1	5	0	0	0	5	5	625
EL	7	1	H-RF.	2	5	1	5	0	0	0	5	5	625
EL	7	1	H-RF.	2	5	1	5	0	0	0	5	5	625
EL	7	1	H-RF.	2	5	1	5	0	0	0	5	5	625
EL	7	1	H-RF.	2	5	1	5	0	0	0	5	5	625
EL	7	1	H-RF.	2	5	1	5	0	0	0	5	5	625
EL	7	1	H-RF.	2	5	1	5	0	0	0	5	5	625
EL	7	1	H-RF.	2	5	1	5	0	0	0	5	5	625
EL	7	1	H-SD.	4	5	1	5	0	0	0	5	5	852
EL	7	1	H-SD.	4	5	1	5	0	0	0	5	5	852
EL	7	1	H-SD.	4	5	1	5	0	0	0	5	5	852
EL	7	1	H-SD.	4	5	1	5	0	0	0	5	5	852
EL	7	1	H-SD.	4	5	1	5	0	0	0	5	5	852
EL	7	1	H-SD.	4	5	1	5	0	0	0	5	5	852
EL	7	1	H-SD.	4	5	1	5	0	0	0	5	5	852
EL	7	1	H-SD.	4	5	1	5	0	0	0	5	5	852
EL	7	1	H-SD.	4	5	1	5	0	0	0	5	5	852
EL	7	1	H-SD.	4	5	1	5	0	0	0	5	5	852
EL	7	1	H-SD.	4	5	1	5	0	0	0	5	5	852
EL	7	1	H-SD.	4	5	1	5	0	0	0	5	5	852
EL	7	1	H-R..	5	5	1	5	0	0	0	5	5	852
EL	7	3	H-SD.	4	5	1	5	0	0	0	5	5	1381
EL	7	3	H-SD.	4	5	1	5	0	0	0	5	5	1381
FR	9	2	H-R..	5	5	1	5	0	0	0	5	5	852
FR	9	2	H-R..	5	5	1	5	0	0	0	5	5	853
FR	9	2	H-R..	5	5	1	5	0	0	0	5	5	853
FR	9	2	H-R..	5	5	1	5	0	0	0	5	5	853
FR	9	2	H-R..	5	5	1	5	0	0	0	5	5	853
FR	9	2	R-H..	1	5	1	4	0	0	0	4	4	853
FR	9	1	H-R..	5	5	1	5	0	0	0	5	5	178
FR	9	1	H-R..	5	5	1	5	0	0	0	5	5	852
FR	9	1	H-R..	5	5	1	5	0	0	0	5	5	852
FR	9	1	H-R..	5	5	1	5	0	0	0	5	5	852
FR	9	1	H-R..	5	5	1	5	0	0	0	5	5	853
FR	9	1	H-R..	5	5	1	5	0	0	0	5	5	853
FR	9	1	H-R..	5	5	1	5	0	0	0	5	5	853
FR	9	1	H-R..	5	5	1	5	0	0	0	5	5	853
FR	9	1	H-R..	5	5	1	5	0	0	0	5	5	853
FR	9	1	H-R..	5	5	1	5	0	0	0	5	5	853
HR	11	2	R-H..	1	5	1	5	0	0	0	5	5	852
HR	11	2	R-H..	1	5	1	5	0	0	0	5	5	852
HR	11	2	R-H..	1	5	1	5	0	0	0	5	5	852
HR	11	2	R-H..	1	5	1	5	0	0	0	5	5	852
HR	11	2	R-H..	1	5	1	5	0	0	0	5	5	852
HR	11	2	R-H..	1	5	1	5	0	0	0	5	5	852
HR	11	2	R-H..	1	5	1	5	0	0	0	5	5	852
HR	11	2	R-H..	1	5	1	5	0	0	0	5	5	852
HR	11	2	R-H..	1	5	1	5	0	0	0	5	5	852
HR	11	2	H-R..	5	5	1	5	0	0	0	5	5	853
HR	11	2	R-H..	1	5	1	5	0	0	0	5	5	853
HR	11	2	R-H..	1	5	1	5	0	0	0	5	5	853
HR	11	2	R-H..	1	5	1	5	0	0	0	5	5	853
HR	11	2	R-H..	1	5	1	5	0	0	0	5	5	853
HR	11	2	R-H..	1	5	1	5	0	0	0	5	5	853
HR	11	2	R-H..	1	5	1	5	0	0	0	5	5	853
HR	11	1	R-H..	1	5	1	5	0	0	0	5	5	852
HR	11	1	R-H..	1	5	1	5	0	0	0	5	5	852
HR	11	1	R-H..	1	5	1	5	0	0	0	5	5	852
HR	11	1	R-H..	1	5	1	5	0	0	0	5	5	852
HR	11	1	R-H..	1	5	1	5	0	0	0	5	5	852
HR	11	1	R-H..	1	5	1	5	0	0	0	5	5	852
HR	11	1	R-H..	1	5	1	5	0	0	0	5	5	852
HR	11	1	R-H..	1	5	1	5	0	0	0	5	5	852
HR	11	1	R-H..	1	5	1	5	0	0	0	5	5	852
HR	11	1	R-H..	1	5	1	5	0	0	0	5	5	853
HR	11	1	R-H..	1	5	1	5	0	0	0	5	5	853
HR	11	1	R-H..	1	5	1	5	0	0	0	5	5	853
HR	11	1	R-H..	1	5	1	5	0	0	0	5	5	853
HR	11	1	R-H..	1	5	1	5	0	0	0	5	5	853
HR	11	1	R-H..	1	5	1	5	0	0	0	5	5	853
HR	11	1	R-H..	1	5	1	5	0	0	0	5	5	853
IT	12	2	H-R..	5	5	1	5	5	5	0	5	5	625
IT	12	2	H-R..	5	5	1	5	5	5	0	5	5	625
IT	12	2	H-R..	5	5	1	5	5	5	0	5	5	852
IT	12	2	H-R..	5	5	1	5	5	5	0	5	5	852
IT	12	2	H-R..	5	5	1	5	5	5	0	5	5	852
IT	12	2	H-R..	5	5	1	5	5	5	0	5	5	852
IT	12	2	H-R..	5	5	1	5	5	5	0	5	5	853
IT	12	2	H-R..	5	5	1	5	5	5	0	5	5	853
IT	12	2	H-R..	5	5	1	5	5	5	0	5	5	853
IT	12	2	H-R..	5	5	1	5	5	5	0	5	5	853
IT	12	2	H-R..	5	5	1	5	5	5	0	5	5	853
IT	12	2	H-R..	5	5	1	5	5	5	0	5	5	853
IT	12	2	H-R..	5	5	1	5	5	5	0	5	5	853
IT	12	2	H-R..	5	5	1	5	5	5	0	5	5	853
IT	12	1	H-R..	5	5	1	5	5	5	0	5	5	625
IT	12	1	H-R..	5	5	1	5	5	5	0	5	5	625
IT	12	1	H-R..	5	5	1	5	5	5	0	5	5	852
IT	12	1	H-R..	5	5	1	5	5	5	0	5	5	852
IT	12	1	H-R..	5	5	1	5	5	5	0	5	5	852
IT	12	1	H-R..	5	5	1	5	5	5	0	5	5	852
IT	12	1	H-R..	5	5	1	5	5	5	0	5	5	853
IT	12	1	H-R..	5	5	1	5	5	5	0	5	5	853
IT	12	1	H-R..	5	5	1	5	5	5	0	5	5	853
IT	12	1	H-R..	5	5	1	5	5	5	0	5	5	853
IT	12	1	H-R..	5	5	1	5	5	5	0	5	5	853
IT	12	1	H-R..	5	5	1	5	5	3	0	4.33333	5	853
IT	12	1	H-R..	5	5	1	5	5	5	0	5	5	853
LV	13	2	H-R..	5	5	1	5	0	0	0	5	5	852
LV	13	2	H-R..	5	5	1	5	0	0	0	5	5	852
LV	13	2	R-H..	1	5	1	3	0	0	0	3	3	852
LV	13	2	R-H..	1	5	1	3	0	0	0	3	3	852
LV	13	2	H-R..	5	5	1	5	0	0	0	5	5	853
LV	13	2	H-R..	5	5	1	5	0	0	0	5	5	853
LV	13	1	H-R..	5	5	1	5	0	0	0	5	5	852
LV	13	1	H-R..	5	5	1	5	0	0	0	5	5	852
LV	13	1	R-H..	1	5	1	3	0	0	0	3	3	852
LV	13	1	R-H..	1	5	1	3	0	0	0	3	3	852
LV	13	1	H-R..	5	5	1	5	0	0	0	5	5	853
LV	13	1	H-R..	5	5	1	5	0	0	0	5	5	853
LT	14	2	H-RF.	2	5	1	5	0	0	0	5	5	625
LT	14	2	H-RF.	2	5	1	5	0	0	0	5	5	852
LT	14	2	H-RF.	2	5	1	5	0	0	0	5	5	852
LT	14	2	H-RF.	2	5	1	5	0	0	0	5	5	852
LT	14	2	H-RF.	2	5	1	5	0	0	0	5	5	852
LT	14	2	H-RF.	2	5	1	5	0	0	0	5	5	852
LT	14	2	H-RF.	2	5	1	5	0	0	0	5	5	852
LT	14	2	H-RF.	2	5	1	5	0	0	0	5	5	852
LT	14	2	H-R..	5	5	1	5	0	0	0	5	5	852
LT	14	2	H-RF.	2	5	1	5	0	0	0	5	5	852
LT	14	2	H-RF.	2	5	1	5	0	0	0	5	5	852
LT	14	2	H-RF.	2	5	1	5	0	0	0	5	5	852
LT	14	2	R-H..	1	5	1	5	0	0	0	5	5	853
LT	14	2	R-H..	1	5	1	5	0	0	0	5	5	853
LT	14	2	R-H..	1	5	1	5	0	0	0	5	5	853
LT	14	2	R-H..	1	5	1	5	0	0	0	5	5	853
LT	14	2	R-H..	1	5	1	5	0	0	0	5	5	853
LT	14	2	R-H..	1	5	1	5	0	0	0	5	5	853
LT	14	2	R-H..	1	5	1	5	0	0	0	5	5	853
LT	14	2	R-H..	1	5	1	5	0	0	0	5	5	853
LT	14	2	R-H..	1	5	1	5	0	0	0	5	5	853
LT	14	2	R-H..	1	5	1	5	0	0	0	5	5	853
LT	14	2	R-H..	1	5	1	5	0	0	0	5	5	853
LT	14	2	R-H..	1	5	1	5	0	0	0	5	5	853
LT	14	2	R-H..	1	5	1	5	0	0	0	5	5	853
LT	14	1	H-R..	5	5	1	5	0	0	0	5	5	178
LT	14	1	R-H..	1	5	1	4	0	0	0	4	4	178
LT	14	1	R-H..	1	5	1	5	0	0	0	5	5	178
LT	14	1	R-H..	1	5	1	5	0	0	0	5	5	178
LT	14	1	R-H..	1	5	1	5	0	0	0	5	5	178
LT	14	1	R-H..	1	5	1	5	0	0	0	5	5	178
LT	14	1	R-H..	1	5	1	5	0	0	0	5	5	178
LT	14	1	R-H..	1	5	1	5	0	0	0	5	5	178
LT	14	1	R-H..	1	5	1	5	0	0	0	5	5	178
LT	14	1	R-H..	1	5	1	5	0	0	0	5	5	178
LT	14	1	R-H..	1	5	1	5	0	0	0	5	5	178
LT	14	1	R-H..	1	5	1	5	0	0	0	5	5	178
LT	14	1	R-H..	1	5	1	5	0	0	0	5	5	178
LT	14	1	R-H..	1	5	1	5	0	0	0	5	5	178
LT	14	1	R-H..	1	5	1	5	0	0	0	5	5	178
LT	14	1	R-H..	1	5	1	5	0	0	0	5	5	178
LT	14	1	R-H..	1	5	1	5	0	0	0	5	5	178
LT	14	1	R-H..	1	5	1	5	0	0	0	5	5	178
LT	14	1	R-H..	1	5	1	5	0	0	0	5	5	178
LT	14	1	R-H..	1	5	1	5	0	0	0	5	5	178
LT	14	1	R-H..	1	5	1	5	0	0	0	5	5	625
LT	14	1	R-H..	1	5	1	5	0	0	0	5	5	625
LT	14	1	R-H..	1	5	1	5	0	0	0	5	5	625
LT	14	1	H-RF.	2	5	1	5	0	0	0	5	5	625
LT	14	1	R-H..	1	5	1	5	0	0	0	5	5	625
LT	14	1	R-H..	1	5	1	5	0	0	0	5	5	625
LT	14	1	H-RF.	2	5	1	5	0	0	0	5	5	852
LT	14	1	H-RF.	2	5	1	5	0	0	0	5	5	852
LT	14	1	H-RF.	2	5	1	5	0	0	0	5	5	852
LT	14	1	H-R..	5	5	1	5	0	0	0	5	5	852
LT	14	1	H-RF.	2	5	1	5	0	0	0	5	5	852
LT	14	1	H-RF.	2	5	1	5	0	0	0	5	5	852
LT	14	1	H-RF.	2	5	1	5	0	0	0	5	5	852
LT	14	1	H-RF.	2	5	1	5	0	0	0	5	5	852
LT	14	1	H-RF.	2	5	1	5	0	0	0	5	5	852
LT	14	1	H-R..	5	5	1	5	0	0	0	5	5	852
LT	14	1	H-RF.	2	5	1	5	0	0	0	5	5	852
LT	14	1	H-RF.	2	5	1	5	0	0	0	5	5	852
LT	14	1	H-RF.	2	5	1	5	0	0	0	5	5	852
LT	14	1	H-RF.	2	5	1	5	0	0	0	5	5	853
LT	14	1	H-RF.	2	5	1	5	0	0	0	5	5	853
LT	14	1	R-H..	1	5	1	5	0	0	0	5	5	853
LT	14	1	R-H..	1	5	1	5	0	0	0	5	5	853
LT	14	1	R-H..	1	5	1	5	0	0	0	5	5	853
LT	14	1	R-H..	1	5	1	5	0	0	0	5	5	853
LT	14	1	R-H..	1	5	1	5	0	0	0	5	5	853
LT	14	1	R-H..	1	5	1	5	0	0	0	5	5	853
LT	14	1	R-H..	1	5	1	5	0	0	0	5	5	853
HU	15	2	R-H..	1	5	1	1	0	0	0	1	1	178
HU	15	2	R-H..	1	5	1	1	0	0	0	1	1	852
HU	15	2	H-R..	5	5	1	1	0	0	0	1	1	853
HU	15	2	H-R..	5	5	1	1	0	0	0	1	1	853
HU	15	2	H-R..	5	5	1	1	0	0	0	1	1	853
HU	15	2	H-R..	5	5	1	1	0	0	0	1	1	853
HU	15	2	R-H..	1	5	1	2	0	0	0	2	2	853
HU	15	2	R-H..	1	5	1	2	0	0	0	2	2	853
HU	15	2	R-H..	1	5	1	2	0	0	0	2	2	853
HU	15	2	R-H..	1	5	1	5	0	0	0	5	5	178
HU	15	2	R-H..	1	5	1	5	0	0	0	5	5	178
HU	15	2	R-H..	1	5	1	5	0	0	0	5	5	178
HU	15	2	R-H..	1	5	1	5	0	0	0	5	5	178
HU	15	2	R-H..	1	5	1	5	0	0	0	5	5	625
HU	15	2	R-H..	1	5	1	5	0	0	0	5	5	625
HU	15	2	R-H..	1	5	1	5	0	0	0	5	5	852
HU	15	1	H-R..	5	5	1	2	0	0	0	2	2	853
HU	15	1	R-H..	1	5	1	1	0	0	0	1	1	852
HU	15	1	R-H..	1	5	1	2	0	0	0	2	2	178
HU	15	1	R-H..	1	5	1	1	0	0	0	1	1	852
HU	15	1	R-H..	1	5	1	5	0	0	0	5	5	178
HU	15	1	R-H..	1	5	1	5	0	0	0	5	5	178
HU	15	1	R-H..	1	5	1	5	0	0	0	5	5	178
HU	15	1	R-H..	1	5	1	5	0	0	0	5	5	178
HU	15	1	R-H..	1	5	1	5	0	0	0	5	5	178
HU	15	1	R-H..	1	5	1	5	0	0	0	5	5	178
HU	15	1	R-H..	1	5	1	5	0	0	0	5	5	625
HU	15	1	R-H..	1	5	1	5	0	0	0	5	5	625
HU	15	1	R-H..	1	5	1	5	0	0	0	5	5	852
HU	15	1	R-H..	1	5	1	5	0	0	0	5	5	852
HU	15	3	R-H..	1	5	1	2	0	0	0	2	2	1381
MT	16	2	H-R..	5	5	1	0	0	0	0	0	0	625
MT	16	2	H-R..	5	5	1	0	0	0	0	0	0	853
MT	16	2	H-R..	5	5	1	0	0	0	0	0	0	853
MT	16	2	R-H..	1	5	1	0	0	0	0	0	0	853
MT	16	1	H-R..	5	5	1	0	0	0	0	0	0	625
MT	16	1	H-R..	5	5	1	0	0	0	0	0	0	853
MT	16	1	H-R..	5	5	1	0	0	0	0	0	0	853
MT	16	1	H-R..	5	5	1	0	0	0	0	0	0	853
MT	16	1	R-H..	1	5	1	0	0	0	0	0	0	853
NL	17	2	H-R..	5	5	1	5	0	0	0	5	5	852
NL	17	2	H-R..	5	5	1	5	0	0	0	5	5	852
NL	17	2	H-R..	5	5	1	5	0	0	0	5	5	852
NL	17	2	H-R..	5	5	1	5	0	0	0	5	5	853
NL	17	2	H-R..	5	5	1	5	0	0	0	5	5	853
NL	17	2	H-R..	5	5	1	5	0	0	0	5	5	853
NL	17	2	H-R..	5	5	1	5	0	0	0	5	5	853
NL	17	2	H-R..	5	5	1	5	0	0	0	5	5	853
NL	17	2	R-H..	1	5	1	5	0	0	0	5	5	853
NL	17	1	H-R..	5	5	1	5	0	0	0	5	5	852
NL	17	1	H-R..	5	5	1	5	0	0	0	5	5	852
NL	17	1	H-R..	5	5	1	5	0	0	0	5	5	852
NL	17	1	H-R..	5	5	1	5	0	0	0	5	5	853
NL	17	1	H-R..	5	5	1	5	0	0	0	5	5	853
NL	17	1	H-R..	5	5	1	5	0	0	0	5	5	853
NL	17	1	H-R..	5	5	1	5	0	0	0	5	5	853
NL	17	1	H-R..	5	5	1	5	0	0	0	5	5	853
NL	17	1	H-R..	5	5	1	5	0	0	0	5	5	853
NL	17	1	R-H..	1	5	1	5	0	0	0	5	5	853
PL	18	2	R-H..	1	5	1	5	0	0	0	5	5	178
PL	18	2	R-H..	1	5	1	5	0	0	0	5	5	178
PL	18	2	R-H..	1	5	1	5	0	0	0	5	5	178
PL	18	2	R-H..	1	5	1	5	0	0	0	5	5	178
PL	18	2	R-H..	1	5	1	5	0	0	0	5	5	178
PL	18	2	R-H..	1	5	1	5	0	0	0	5	5	178
PL	18	2	R-H..	1	5	1	5	0	0	0	5	5	178
PL	18	2	R-H..	1	5	1	5	0	0	0	5	5	178
PL	18	2	R-H..	1	5	1	5	0	0	0	5	5	625
PL	18	2	R-H..	1	5	1	5	0	0	0	5	5	625
PL	18	2	R-H..	1	5	1	5	0	0	0	5	5	625
PL	18	2	R-H..	1	5	1	5	0	0	0	5	5	625
PL	18	2	H-R..	5	5	1	5	0	0	0	5	5	852
PL	18	2	R-H..	1	5	1	5	0	0	0	5	5	853
PL	18	2	R-H..	1	5	1	5	0	0	0	5	5	853
PL	18	2	R-H..	1	5	1	5	0	0	0	5	5	853
PL	18	2	R-H..	1	5	1	5	0	0	0	5	5	853
PL	18	2	R-H..	1	5	1	5	0	0	0	5	5	853
PL	18	2	R-H..	1	5	1	5	0	0	0	5	5	853
PL	18	1	R-H..	1	5	1	5	0	0	0	5	5	178
PL	18	1	R-H..	1	5	1	5	0	0	0	5	5	178
PL	18	1	R-H..	1	5	1	5	0	0	0	5	5	178
PL	18	1	R-H..	1	5	1	5	0	0	0	5	5	178
PL	18	1	R-H..	1	5	1	5	0	0	0	5	5	178
PL	18	1	R-H..	1	5	1	5	0	0	0	5	5	178
PL	18	1	R-H..	1	5	1	5	0	0	0	5	5	178
PL	18	1	R-H..	1	5	1	5	0	0	0	5	5	178
PL	18	1	R-H..	1	5	1	5	0	0	0	5	5	178
PL	18	1	R-H..	1	5	1	5	0	0	0	5	5	178
PL	18	1	R-H..	1	5	1	5	0	0	0	5	5	178
PL	18	1	R-H..	1	5	1	5	0	0	0	5	5	178
PL	18	1	R-H..	1	5	1	5	0	0	0	5	5	178
PL	18	1	R-H..	1	5	1	5	0	0	0	5	5	178
PL	18	1	R-H..	1	5	1	5	0	0	0	5	5	178
PL	18	1	R-H..	1	5	1	5	0	0	0	5	5	625
PL	18	1	R-H..	1	5	1	5	0	0	0	5	5	625
PL	18	1	R-H..	1	5	1	5	0	0	0	5	5	625
PL	18	1	R-H..	1	5	1	5	0	0	0	5	5	625
PL	18	1	R-H..	1	5	1	5	0	0	0	5	5	625
PL	18	1	R-H..	1	5	1	5	0	0	0	5	5	625
PL	18	1	H-R..	5	5	1	5	0	0	0	5	5	852
PL	18	1	R-H..	1	5	1	5	0	0	0	5	5	853
PL	18	1	R-H..	1	5	1	5	0	0	0	5	5	853
PL	18	1	R-H..	1	5	1	5	0	0	0	5	5	853
PL	18	1	R-H..	1	5	1	5	0	0	0	5	5	853
PT	19	2	H-R..	5	5	1	5	5	0	0	5	5	178
PT	19	2	H-R..	5	5	1	5	5	0	0	5	5	852
PT	19	2	H-R..	5	5	1	5	5	0	0	5	5	852
PT	19	2	H-R..	5	5	1	5	5	0	0	5	5	852
PT	19	2	H-R..	5	5	1	5	5	0	0	5	5	852
PT	19	2	H-R..	5	5	1	5	5	0	0	5	5	852
PT	19	2	H-R..	5	5	1	5	5	0	0	5	5	852
PT	19	2	H-R..	5	5	1	5	5	0	0	5	5	852
PT	19	2	H-R..	5	5	1	5	5	0	0	5	5	852
PT	19	2	H-R..	5	5	1	5	5	0	0	5	5	852
PT	19	2	H-R..	5	5	1	5	5	0	0	5	5	853
PT	19	2	H-R..	5	5	1	5	5	0	0	5	5	853
PT	19	2	H-R..	5	5	1	5	5	0	0	5	5	853
PT	19	2	H-R..	5	5	1	5	5	0	0	5	5	853
PT	19	2	H-R..	5	5	1	5	5	0	0	5	5	853
PT	19	2	H-R..	5	5	1	5	5	0	0	5	5	853
PT	19	2	H-R..	5	5	1	5	5	0	0	5	5	853
PT	19	2	H-R..	5	5	1	5	5	0	0	5	5	853
PT	19	2	H-R..	5	5	1	5	5	0	0	5	5	853
PT	19	2	H-R..	5	5	1	5	5	0	0	5	5	853
PT	19	1	H-R..	5	5	1	5	5	0	0	5	5	178
PT	19	1	H-R..	5	5	1	5	5	0	0	5	5	852
PT	19	1	H-R..	5	5	1	5	5	0	0	5	5	852
PT	19	1	H-R..	5	5	1	5	5	0	0	5	5	852
PT	19	1	H-R..	5	5	1	5	5	0	0	5	5	852
PT	19	1	H-R..	5	5	1	5	5	0	0	5	5	852
PT	19	1	H-R..	5	5	1	5	5	0	0	5	5	852
PT	19	1	H-R..	5	5	1	5	5	0	0	5	5	852
PT	19	1	H-R..	5	5	1	5	5	0	0	5	5	852
PT	19	1	H-R..	5	5	1	5	5	0	0	5	5	852
PT	19	1	H-R..	5	5	1	5	5	0	0	5	5	852
PT	19	1	H-R..	5	5	1	5	5	0	0	5	5	853
PT	19	1	H-R..	5	5	1	5	5	0	0	5	5	853
PT	19	1	H-R..	5	5	1	5	5	0	0	5	5	853
PT	19	1	H-R..	5	5	1	5	5	0	0	5	5	853
PT	19	1	H-R..	5	5	1	5	5	0	0	5	5	853
PT	19	1	H-R..	5	5	1	5	5	0	0	5	5	853
PT	19	1	H-R..	5	5	1	5	5	0	0	5	5	853
PT	19	1	H-R..	5	5	1	5	5	0	0	5	5	853
PT	19	1	H-R..	5	5	1	5	5	0	0	5	5	853
RO	20	2	H-R..	5	5	1	5	5	0	0	5	5	625
RO	20	2	H-R..	5	5	1	5	5	0	0	5	5	852
RO	20	2	H-R..	5	5	1	5	5	0	0	5	5	852
RO	20	2	H-R..	5	5	1	5	5	0	0	5	5	852
RO	20	2	H-R..	5	5	1	5	5	0	0	5	5	852
RO	20	2	H-R..	5	5	1	5	5	0	0	5	5	852
RO	20	2	H-R..	5	5	1	5	5	0	0	5	5	852
RO	20	2	H-R..	5	5	1	5	5	0	0	5	5	852
RO	20	2	H-R..	5	5	1	5	5	0	0	5	5	852
RO	20	2	H-R..	5	5	1	5	5	0	0	5	5	852
RO	20	2	H-R..	5	5	1	5	5	0	0	5	5	852
RO	20	2	H-R..	5	5	1	5	5	0	0	5	5	852
RO	20	2	H-R..	5	5	1	5	5	0	0	5	5	853
RO	20	2	H-R..	5	5	1	5	5	0	0	5	5	853
RO	20	2	H-R..	5	5	1	5	5	0	0	5	5	853
RO	20	2	H-R..	5	5	1	5	5	0	0	5	5	853
RO	20	2	H-R..	5	5	1	5	5	0	0	5	5	853
RO	20	2	H-R..	5	5	1	5	5	0	0	5	5	853
RO	20	2	R-H..	1	5	1	5	5	0	0	5	5	853
RO	20	1	H-R..	5	5	1	5	5	0	0	5	5	625
RO	20	1	H-R..	5	5	1	5	5	0	0	5	5	852
RO	20	1	H-R..	5	5	1	5	5	0	0	5	5	852
RO	20	1	H-R..	5	5	1	5	5	0	0	5	5	852
RO	20	1	H-R..	5	5	1	5	5	0	0	5	5	852
RO	20	1	H-R..	5	5	1	5	5	0	0	5	5	852
RO	20	1	H-R..	5	5	1	5	5	0	0	5	5	852
RO	20	1	H-R..	5	5	1	5	5	0	0	5	5	852
RO	20	1	H-R..	5	5	1	5	5	0	0	5	5	852
RO	20	1	H-R..	5	5	1	5	5	0	0	5	5	852
RO	20	1	H-R..	5	5	1	5	5	0	0	5	5	852
RO	20	1	H-R..	5	5	1	5	5	0	0	5	5	852
RO	20	1	H-R..	5	5	1	5	5	0	0	5	5	852
RO	20	1	H-R..	5	5	1	5	5	0	0	5	5	853
RO	20	1	H-R..	5	5	1	5	5	0	0	5	5	853
RO	20	1	H-R..	5	5	1	5	5	0	0	5	5	853
RO	20	1	H-R..	5	5	1	5	5	0	0	5	5	853
RO	20	1	H-R..	5	5	1	5	5	0	0	5	5	853
RO	20	1	H-R..	5	5	1	5	5	0	0	5	5	853
RO	20	1	H-R..	5	5	1	5	5	0	0	5	5	853
RO	20	1	H-R..	5	5	1	5	5	0	0	5	5	853
RO	20	1	H-R..	5	5	1	5	5	0	0	5	5	853
RO	20	1	H-R..	5	5	1	5	5	0	0	5	5	853
SK	21	2	R-H..	1	5	1	5	0	0	0	5	5	178
SK	21	2	H-R..	5	5	1	4	0	0	0	4	4	178
SK	21	2	H-R..	5	5	1	2	0	0	0	2	2	852
SK	21	2	R-H..	1	5	1	2	0	0	0	2	2	853
SK	21	1	H-R..	5	5	1	4	0	0	0	4	4	178
SK	21	1	H-R..	5	5	1	2	0	0	0	2	2	852
SL	22	2	H-RF.	2	5	1	5	0	0	0	5	5	178
SL	22	2	H-RF.	2	5	1	5	0	0	0	5	5	178
SL	22	2	H-RF.	2	5	1	5	0	0	0	5	5	178
SL	22	2	H-R..	5	5	1	5	0	0	0	5	5	625
SL	22	2	H-R..	5	5	1	5	0	0	0	5	5	852
SL	22	2	H-R..	5	5	1	5	0	0	0	5	5	852
SL	22	2	H-R..	5	5	1	5	0	0	0	5	5	852
SL	22	2	H-R..	5	5	1	5	0	0	0	5	5	852
SL	22	2	H-R..	5	5	1	5	0	0	0	5	5	852
SL	22	2	H-R..	5	5	1	5	0	0	0	5	5	852
SL	22	2	H-R..	5	5	1	5	0	0	0	5	5	852
SL	22	2	H-R..	5	5	1	5	0	0	0	5	5	852
SL	22	2	H-R..	5	5	1	5	0	0	0	5	5	852
SL	22	2	H-R..	5	5	1	5	0	0	0	5	5	852
SL	22	2	H-R..	5	5	1	5	0	0	0	5	5	852
SL	22	2	H-R..	5	5	1	5	0	0	0	5	5	852
SL	22	2	H-R..	5	5	1	5	0	0	0	5	5	852
SL	22	2	H-R..	5	5	1	5	0	0	0	5	5	853
SL	22	2	R-H..	1	5	1	5	0	0	0	5	5	853
SL	22	2	R-H..	1	5	1	5	0	0	0	5	5	853
SL	22	2	R-H..	1	5	1	5	0	0	0	5	5	853
SL	22	2	R-H..	1	5	1	5	0	0	0	5	5	853
SL	22	2	R-H..	1	5	1	5	0	0	0	5	5	853
SL	22	2	R-H..	1	5	1	5	0	0	0	5	5	853
SL	22	2	R-H..	1	5	1	5	0	0	0	5	5	853
SL	22	1	H-RF.	2	5	1	5	0	0	0	5	5	178
SL	22	1	H-RF.	2	5	1	5	0	0	0	5	5	178
SL	22	1	H-RF.	2	5	1	5	0	0	0	5	5	178
SL	22	1	H-R..	5	5	1	5	0	0	0	5	5	852
SL	22	1	H-R..	5	5	1	5	0	0	0	5	5	852
SL	22	1	H-R..	5	5	1	5	0	0	0	5	5	852
SL	22	1	H-R..	5	5	1	5	0	0	0	5	5	852
SL	22	1	H-R..	5	5	1	5	0	0	0	5	5	852
SL	22	1	H-R..	5	5	1	5	0	0	0	5	5	852
SL	22	1	H-R..	5	5	1	5	0	0	0	5	5	852
SL	22	1	H-R..	5	5	1	5	0	0	0	5	5	852
SL	22	1	H-R..	5	5	1	5	0	0	0	5	5	852
SL	22	1	H-R..	5	5	1	5	0	0	0	5	5	852
SL	22	1	H-R..	5	5	1	5	0	0	0	5	5	852
SL	22	1	H-R..	5	5	1	5	0	0	0	5	5	852
SL	22	1	H-R..	5	5	1	5	0	0	0	5	5	852
SL	22	1	H-R..	5	5	1	5	0	0	0	5	5	852
SL	22	1	H-R..	5	5	1	5	0	0	0	5	5	852
SL	22	1	H-R..	5	5	1	5	0	0	0	5	5	853
SL	22	1	H-R..	5	5	1	5	0	0	0	5	5	853
SL	22	1	H-R..	5	5	1	5	0	0	0	5	5	853
SL	22	1	H-R..	5	5	1	5	0	0	0	5	5	853
SL	22	1	R-H..	1	5	1	5	0	0	0	5	5	853
SL	22	1	R-H..	1	5	1	5	0	0	0	5	5	853
SL	22	1	R-H..	1	5	1	5	0	0	0	5	5	853
SL	22	1	R-H..	1	5	1	5	0	0	0	5	5	853
SL	22	1	R-H..	1	5	1	5	0	0	0	5	5	853
SL	22	1	R-H..	1	5	1	5	0	0	0	5	5	853
SL	22	1	R-H..	1	5	1	5	0	0	0	5	5	853
SL	22	1	R-H..	1	5	1	5	0	0	0	5	5	853
SL	22	1	R-H..	1	5	1	5	0	0	0	5	5	853
FI	23	2	R-H..	1	5	1	5	0	0	0	5	5	178
FI	23	2	R-H..	1	5	1	5	0	0	0	5	5	852
FI	23	2	R-H..	1	5	1	5	0	0	0	5	5	853
FI	23	2	R-H..	1	5	1	5	0	0	0	5	5	853
FI	23	2	R-H..	1	5	1	5	0	0	0	5	5	853
FI	23	1	R-H..	1	5	1	5	0	0	0	5	5	852
FI	23	1	R-H..	1	5	1	5	0	0	0	5	5	853
FI	23	1	R-H..	1	5	1	5	0	0	0	5	5	853
FI	23	1	R-H..	1	5	1	5	0	0	0	5	5	853
FI	23	3	R-H..	1	5	1	4	0	0	0	4	4	1381
FI	23	3	R-H..	1	5	1	4	0	0	0	4	4	1381
SV	24	2	H-R..	5	5	1	1	1	0	0	1	1	852
SV	24	2	R-H..	1	5	1	4	4	0	0	4	4	852
SV	24	2	H-R..	5	5	1	1	1	0	0	1	1	853
SV	24	1	R-H..	1	5	1	4	4	0	0	4	4	852
SV	24	1	H-R..	5	5	1	1	2	0	0	1.5	1.5	853

## Sheet: AU_EX_OLD
EUmember	Language	Version	T1a	T2a	T3a	T4a	T5a	T1	T2	T3	T4	T5	Sum	SumA
BG	1	1	5				5	2				2	4	10
CS	2	1					19					19	19	19
ES	3	1			8		3			8		1	9	11
DA	4	1	4				25	4				21	25	29
DE	5	1	3					3					3	3
ET	6	1	17				3	17				3	20	20
EL	7	1		24		14	1		24		14	1	39	39
FR	9	1					10					10	10	10
HR	11	1	16					16					16	16
IT	12	1					13					13	13	13
LV	13	1	2				4					4	4	6
LT	14	1	31	14			3	31	14			3	48	48
HU	15	1	13				1	10					10	14
MT	16	1	1				4						0	5
NL	17	1	1				9	1				9	10	10
PL	18	1	25				1	25				1	26	26
PT	19	1					20					20	20	20
RO	20	1					23					23	23	23
SK	21	1					2					1	1	2
SL	22	1	9	3			19	9	3			19	31	31
FI	23	1	4					4					4	4
SV	24	1	1				1	1					1	2

## Sheet: AU_EX_New
EUmember	Language	Version	T1a	T2a	T3a	T4a	T5a	T1	T2	T3	T4	T5	Sum	SumA
BG	1	2					3					2	2	3
CS	2	2					15					15	15	15
ES	3	2			13		1			13			13	14
DA	4	2	3				17	3				17	20	20
DE	5	2	4					4					4	4
ET	6	2	5					5					5	5
EL	7	2		23		13			23		13		36	36
FR	9	2	1				5	1				5	6	6
HR	11	2	15				1	15				1	16	16
IT	12	2					14					14	14	14
LV	13	2	2				4					4	4	6
LT	14	2	13	11			1	13	11			1	25	25
HU	15	2	12				4	7					7	16
MT	16	2	1				3						0	4
NL	17	2	1				8	1				8	9	9
PL	18	2	18				1	18				1	19	19
PT	19	2					20					20	20	20
RO	20	2	1				18	1				18	19	19
SK	21	2	2				2	1				1	2	4
SL	22	2	7	3			15	7	3			15	25	25
FI	23	2	5					5					5	5
SV	24	2	1				2	1					1	3

## Sheet: AU_EX_Single
EUmember	Language	Version	T1a	T2a	T3a	T4a	T5a	T1	T2	T3	T4	T5
DE	5	3	2					2
ET	6	3	1					1
EL	7	3				2					2
HU	15	3	1					0
FI	23	3	2					2

## Sheet: Skupaj
EUmember	Language	Version	T1a	T2a	T3a	T4a	T5a	T1	T2	T3	T4	T5	Sum	SumA
BG	1	1	5	0	0	0	5	2	0	0	0	2	4	10
CS	2	1	0	0	0	0	19	0	0	0	0	19	19	19
ES	3	1	0	0	8	0	3	0	0	8	0	1	9	11
DA	4	1	4	0	0	0	25	4	0	0	0	21	25	29
DE	5	1	3	0	0	0	0	3	0	0	0	0	3	3
ET	6	1	17	0	0	0	3	17	0	0	0	3	20	20
EL	7	1	0	24	0	14	1	0	24	0	14	1	39	39
FR	9	1	0	0	0	0	10	0	0	0	0	10	10	10
HR	11	1	16	0	0	0	0	16	0	0	0	0	16	16
IT	12	1	0	0	0	0	13	0	0	0	0	13	13	13
LV	13	1	2	0	0	0	4	0	0	0	0	4	4	6
LT	14	1	31	14	0	0	3	31	14	0	0	3	48	48
HU	15	1	13	0	0	0	1	10	0	0	0	0	10	14
MT	16	1	1	0	0	0	4	0	0	0	0	0	0	5
NL	17	1	1	0	0	0	9	1	0	0	0	9	10	10
PL	18	1	25	0	0	0	1	25	0	0	0	1	26	26
PT	19	1	0	0	0	0	20	0	0	0	0	20	20	20
RO	20	1	0	0	0	0	23	0	0	0	0	23	23	23
SK	21	1	0	0	0	0	2	0	0	0	0	1	1	2
SL	22	1	9	3	0	0	19	9	3	0	0	19	31	31
FI	23	1	4	0	0	0	0	4	0	0	0	0	4	4
SV	24	1	1	0	0	0	1	1	0	0	0	0	1	2
BG	1	2	0	0	0	0	3	0	0	0	0	2	2	3
CS	2	2	0	0	0	0	15	0	0	0	0	15	15	15
ES	3	2	0	0	13	0	1	0	0	13	0	0	13	14
DA	4	2	3	0	0	0	17	3	0	0	0	17	20	20
DE	5	2	4	0	0	0	0	4	0	0	0	0	4	4
ET	6	2	5	0	0	0	0	5	0	0	0	0	5	5
EL	7	2	0	23	0	13	0	0	23	0	13	0	36	36
FR	9	2	1	0	0	0	5	1	0	0	0	5	6	6
HR	11	2	15	0	0	0	1	15	0	0	0	1	16	16
IT	12	2	0	0	0	0	14	0	0	0	0	14	14	14
LV	13	2	2	0	0	0	4	0	0	0	0	4	4	6
LT	14	2	13	11	0	0	1	13	11	0	0	1	25	25
HU	15	2	12	0	0	0	4	7	0	0	0	0	7	16
MT	16	2	1	0	0	0	3	0	0	0	0	0	0	4
NL	17	2	1	0	0	0	8	1	0	0	0	8	9	9
PL	18	2	18	0	0	0	1	18	0	0	0	1	19	19
PT	19	2	0	0	0	0	20	0	0	0	0	20	20	20
RO	20	2	1	0	0	0	18	1	0	0	0	18	19	19
SK	21	2	2	0	0	0	2	1	0	0	0	1	2	4
SL	22	2	7	3	0	0	15	7	3	0	0	15	25	25
FI	23	2	5	0	0	0	0	5	0	0	0	0	5	5
SV	24	2	1	0	0	0	2	1	0	0	0	0	1	3
DE	5	3	2	0	0	0	0	2	0	0	0	0	2	2
ET	6	3	1	0	0	0	0	1	0	0	0	0	1	1
EL	7	3	0	0	0	2	0	0	0	0	2	0	2	2
HU	15	3	1	0	0	0	0	0	0	0	0	0	0	1
FI	23	3	2	0	0	0	0	2	0	0	0	0	2	2
